# Supplementary material for: Analysis of 21 Apiospora genomes reveals a genus with tremendous synthesis potential for carbohydrate-active enzymes and secondary metabolites
Source: Research Square preprint supplement (doi:10.21203/rs.3.rs-7297991/v1), 2025-08-20
Supplement: Supplementary file 1 [file 94078f00de068ed95819d0ab.docx]

Additional file 2


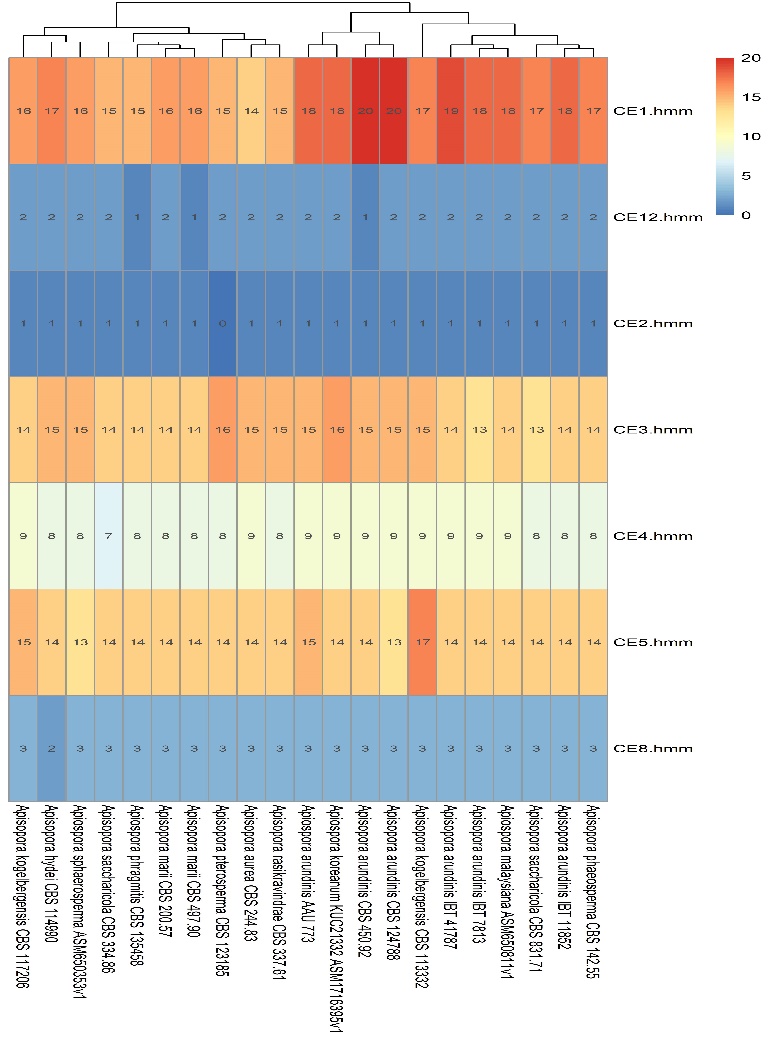


*Figure S1 – Distribution of CAZyme-related genes located in the 21 Apiospora genome assemblies.*


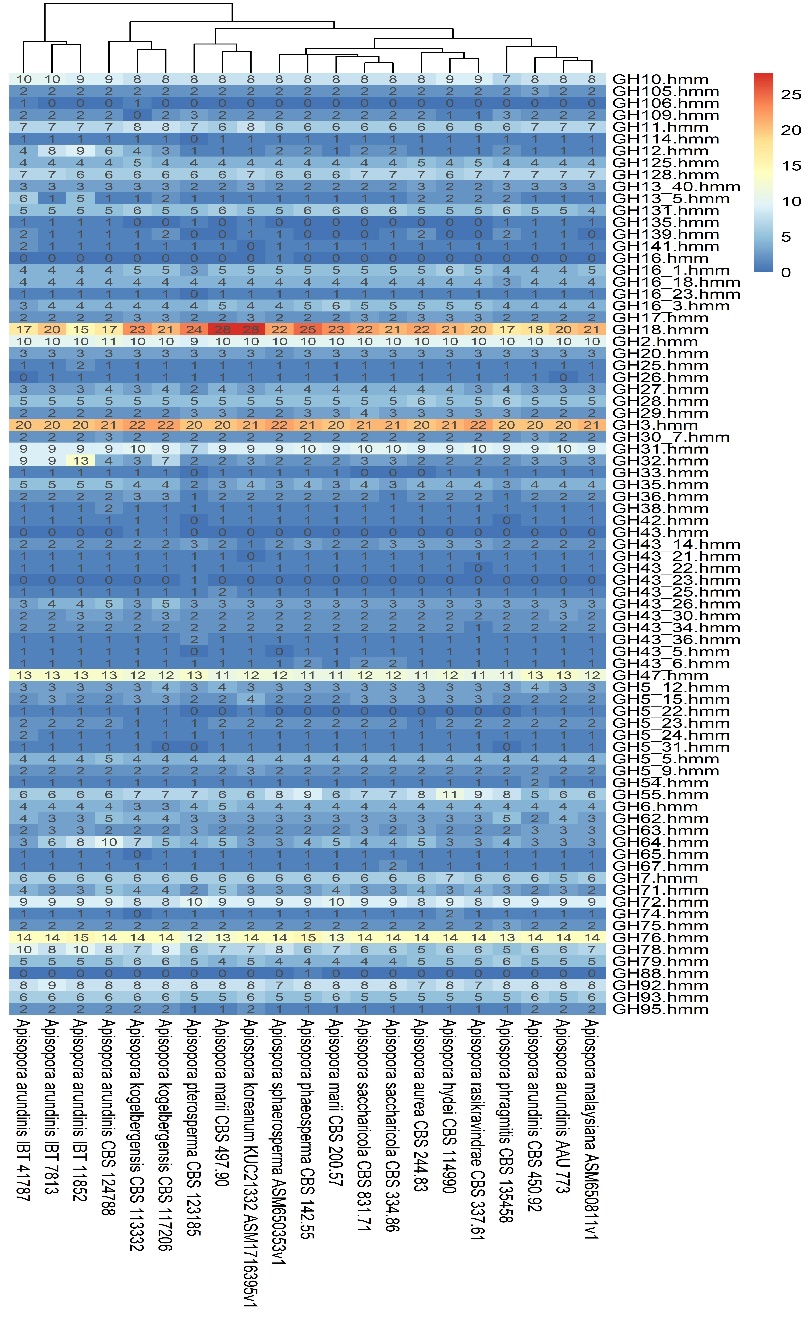


Figure S2 - Distribution of CAZyme-related genes located in the 21 Apiospora genome assemblies.


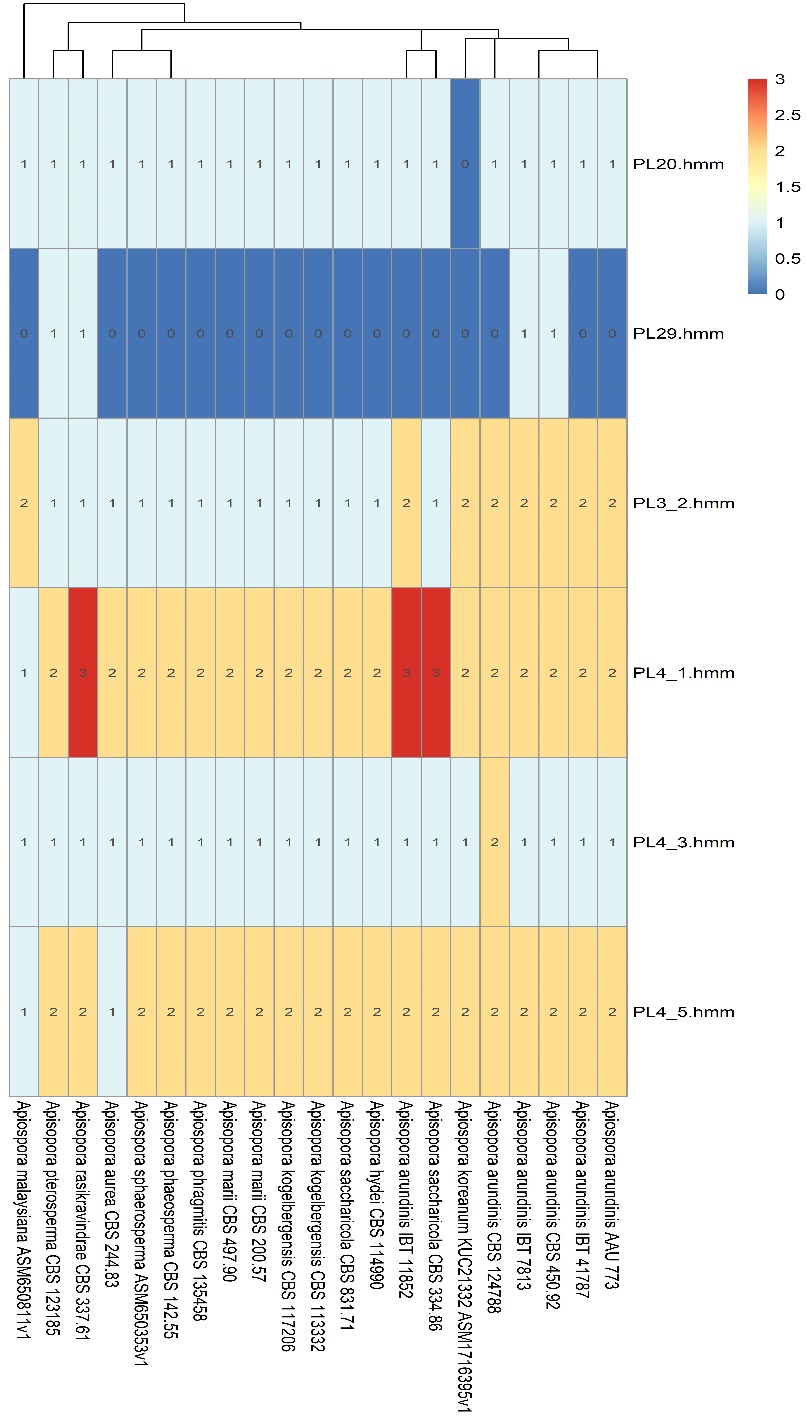


Figure S3 - Distribution of CAZyme-related genes located in the 21 Apiospora genome assemblies.


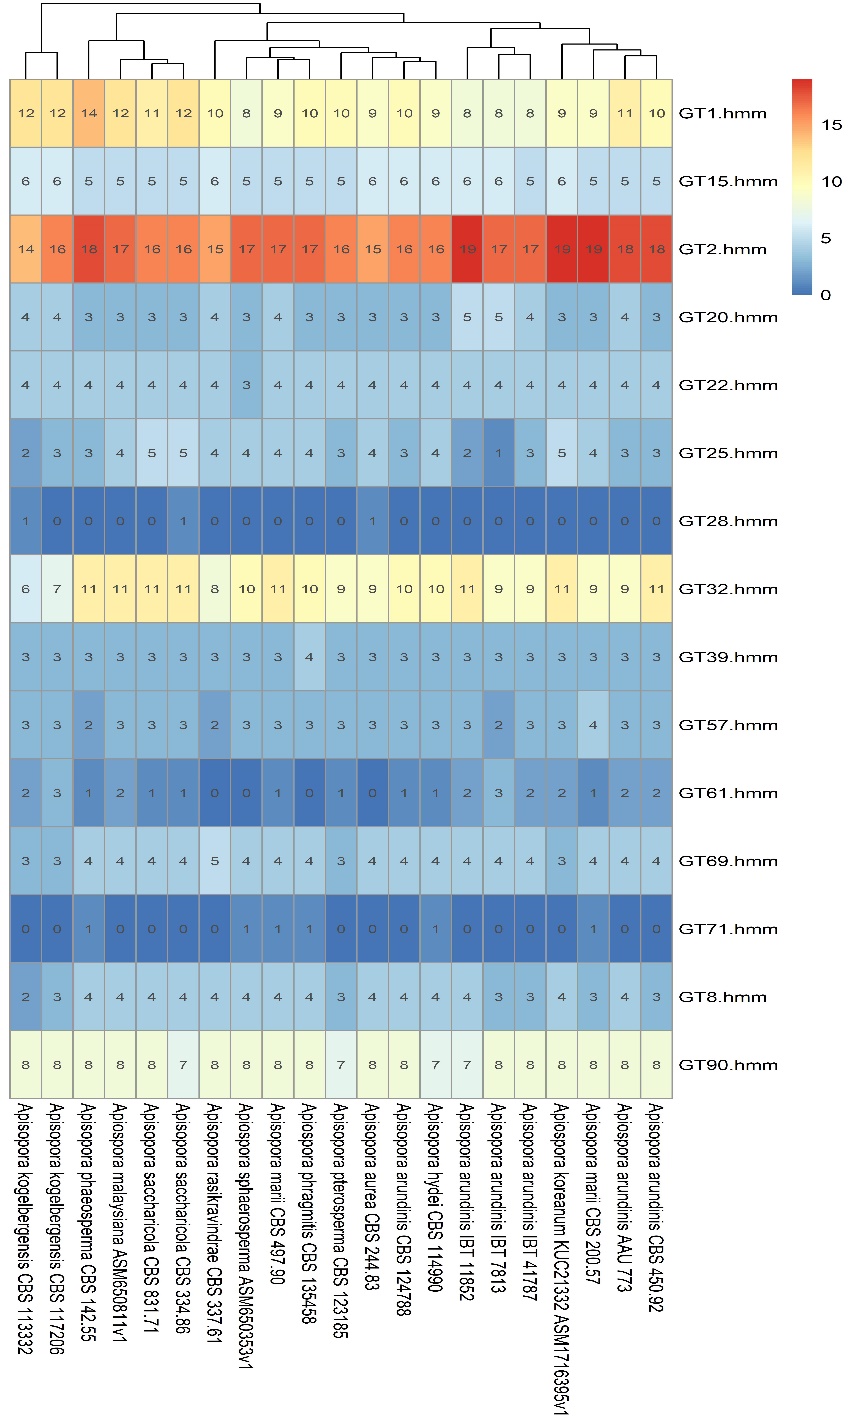


Figure S4 - Distribution of CAZyme-related genes located in the 21 Apiospora genome assemblies.


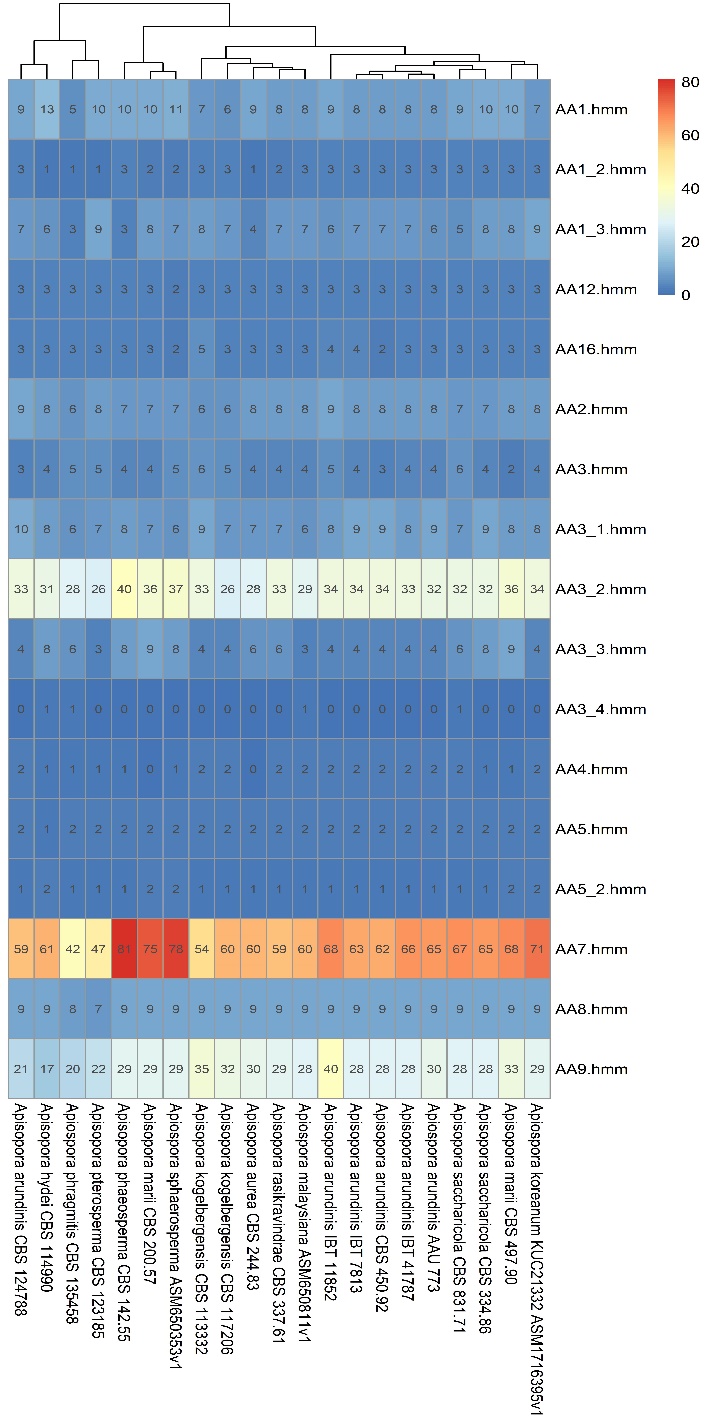


Figure S5 - Distribution of CAZyme-related genes located in the 21 Apiospora genome assemblies.


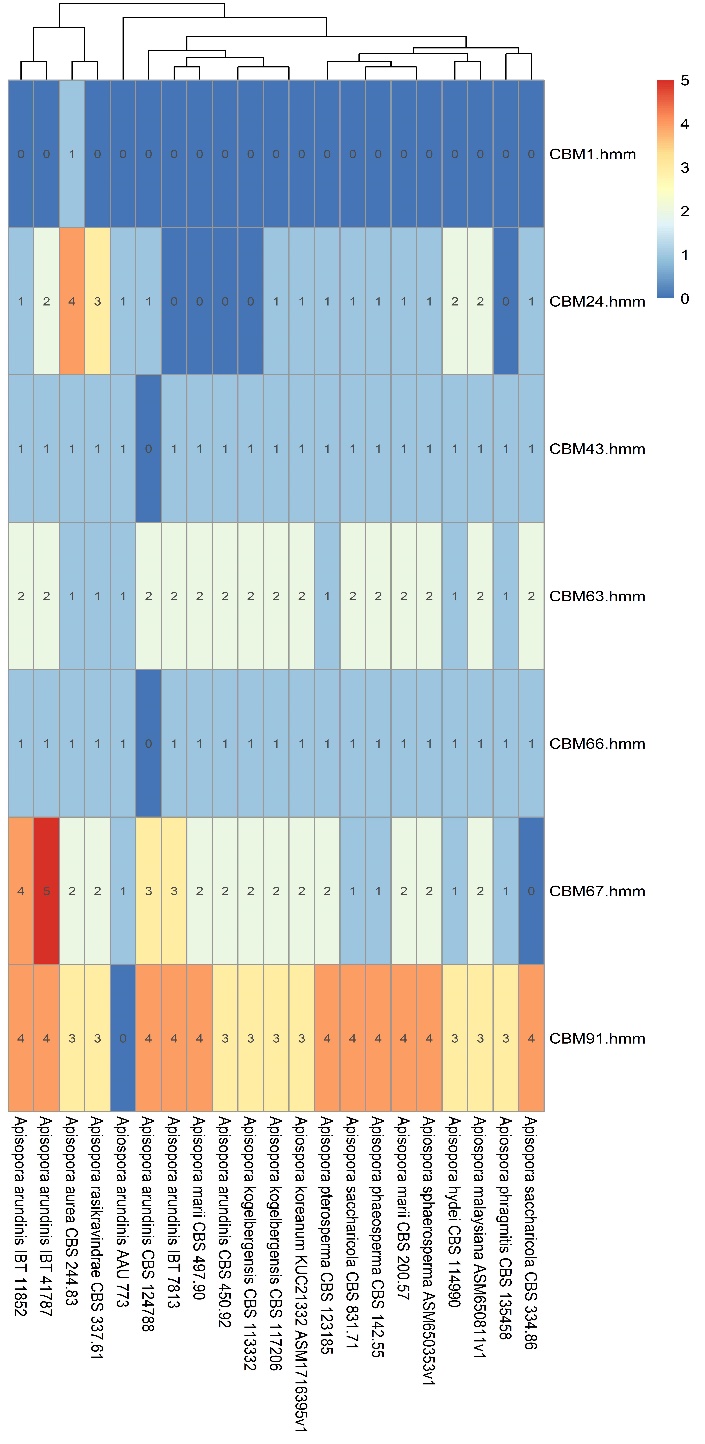


Figure S6 - Distribution of CAZyme-related genes located in the 21 Apiospora genome assemblies.


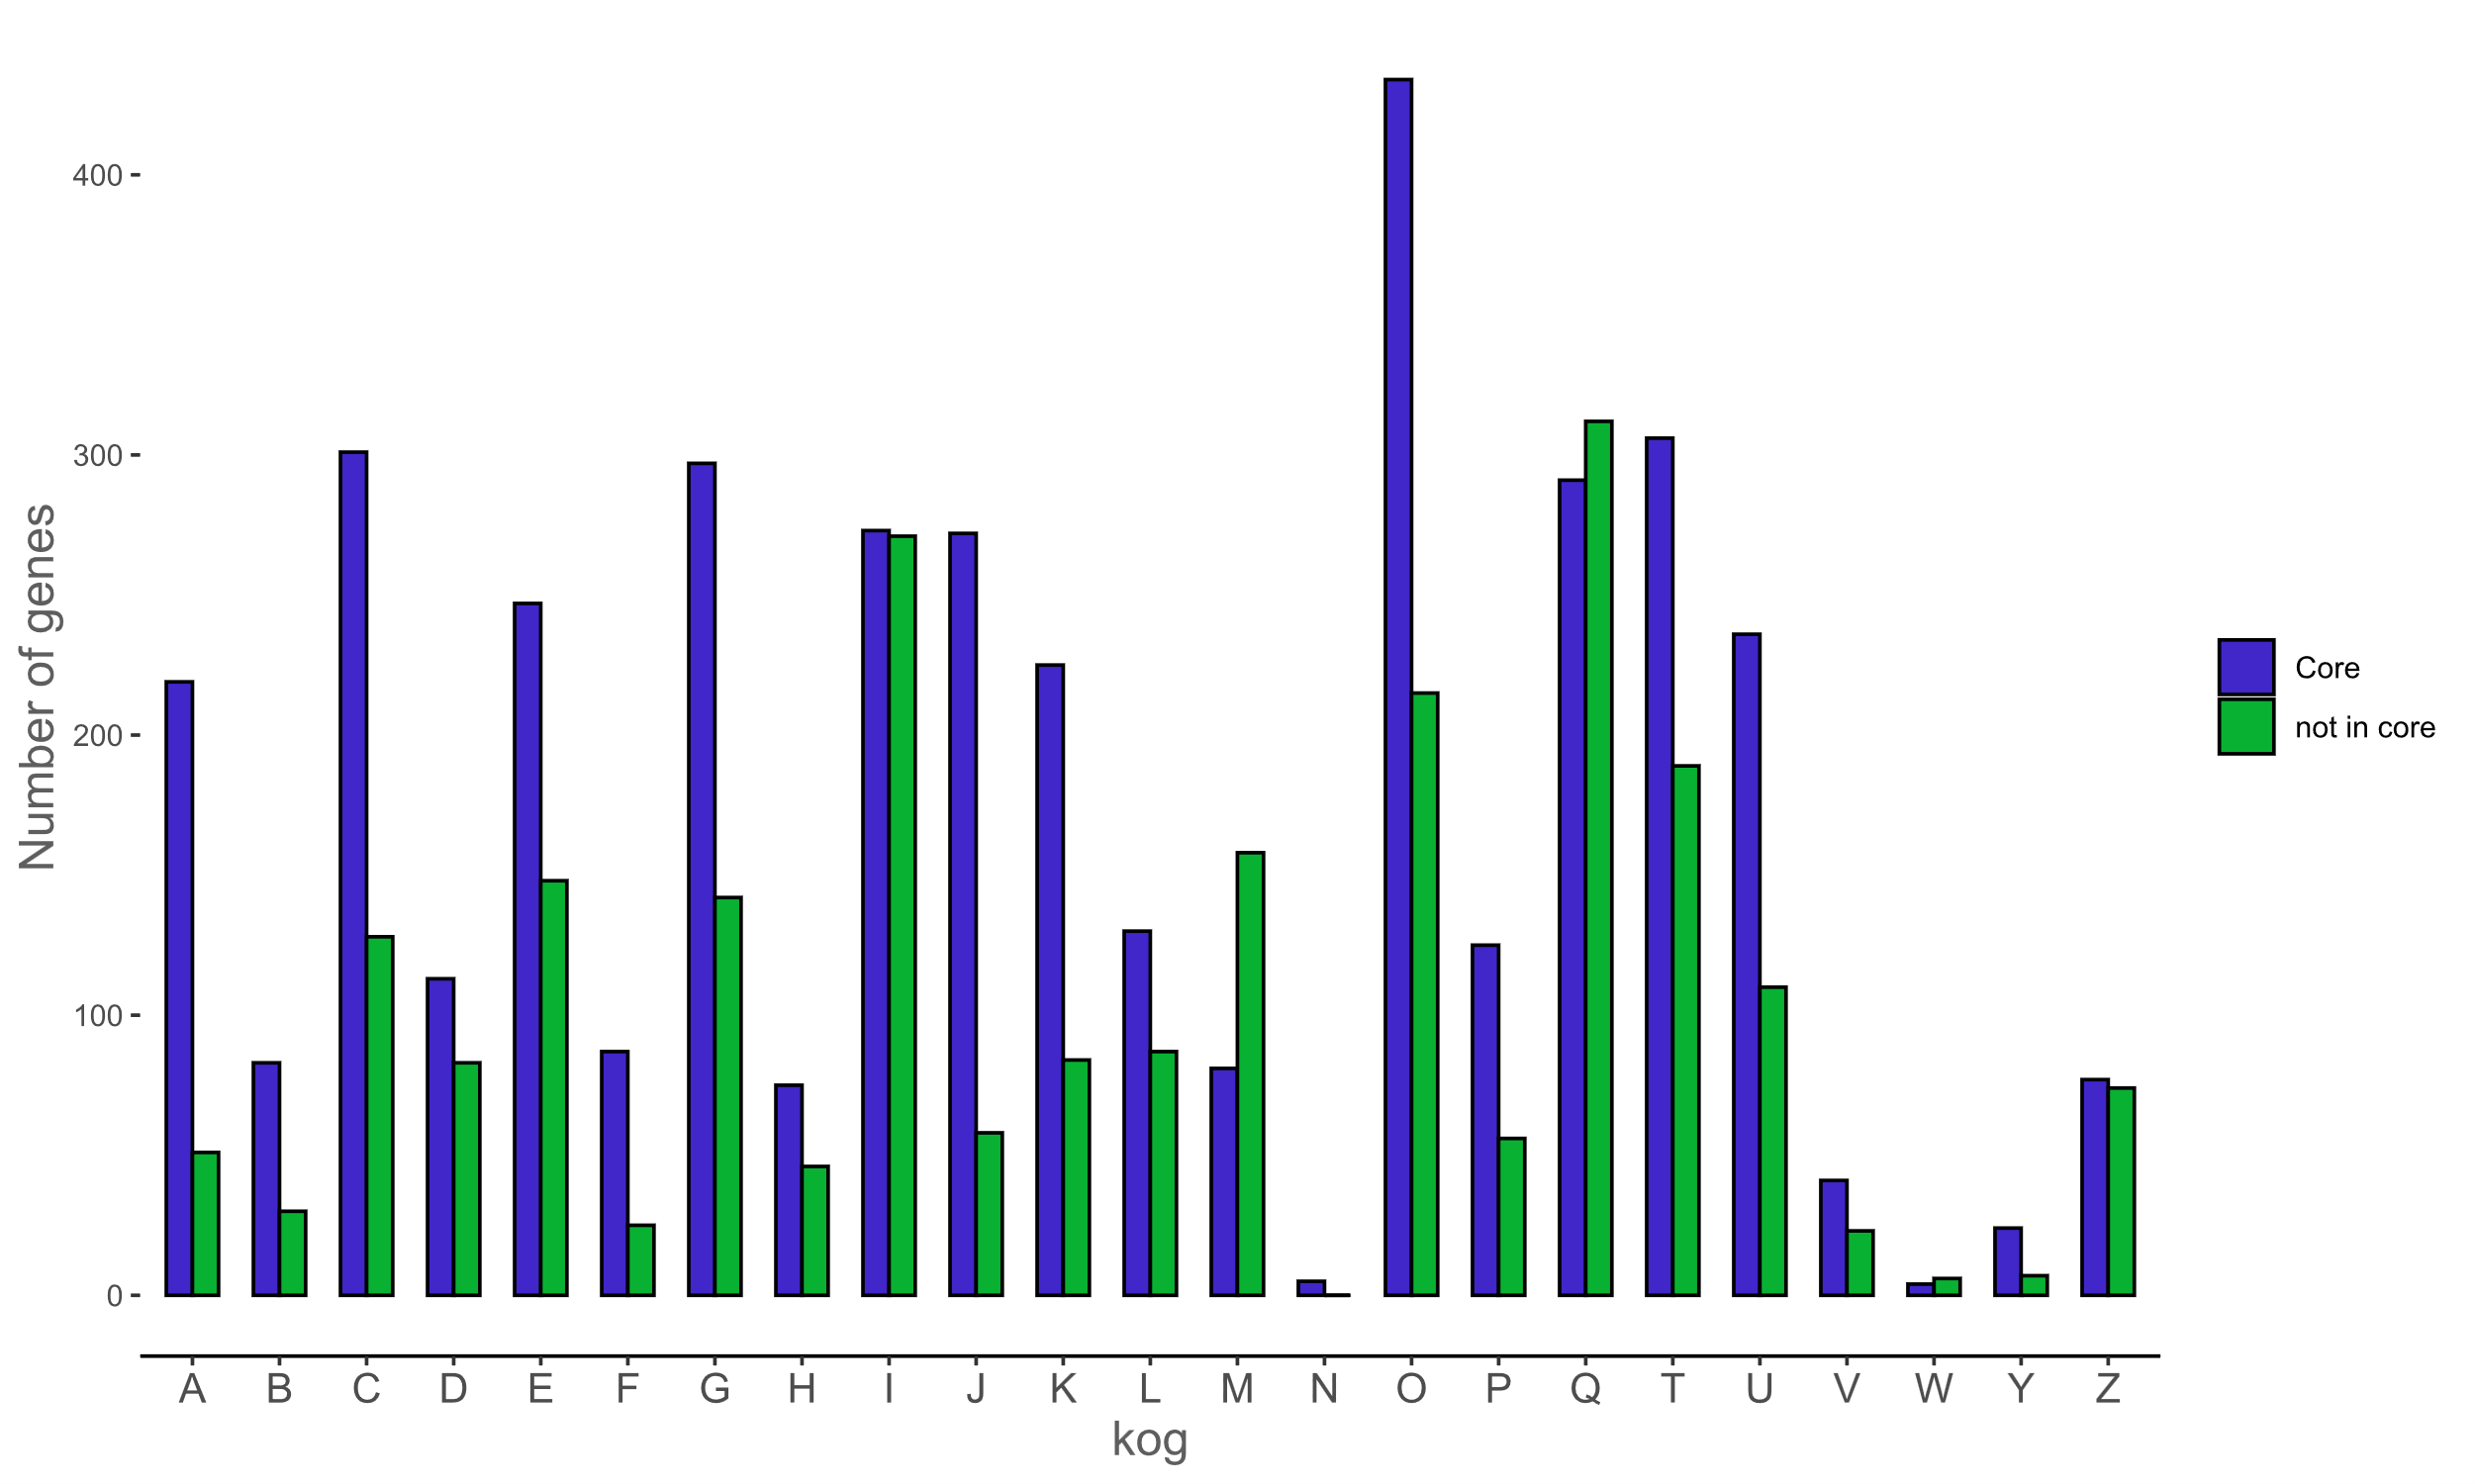


Figure S7 – Distribution of genes with KOG associated terms in the core genome (blue) and in the dispensable genome (green).


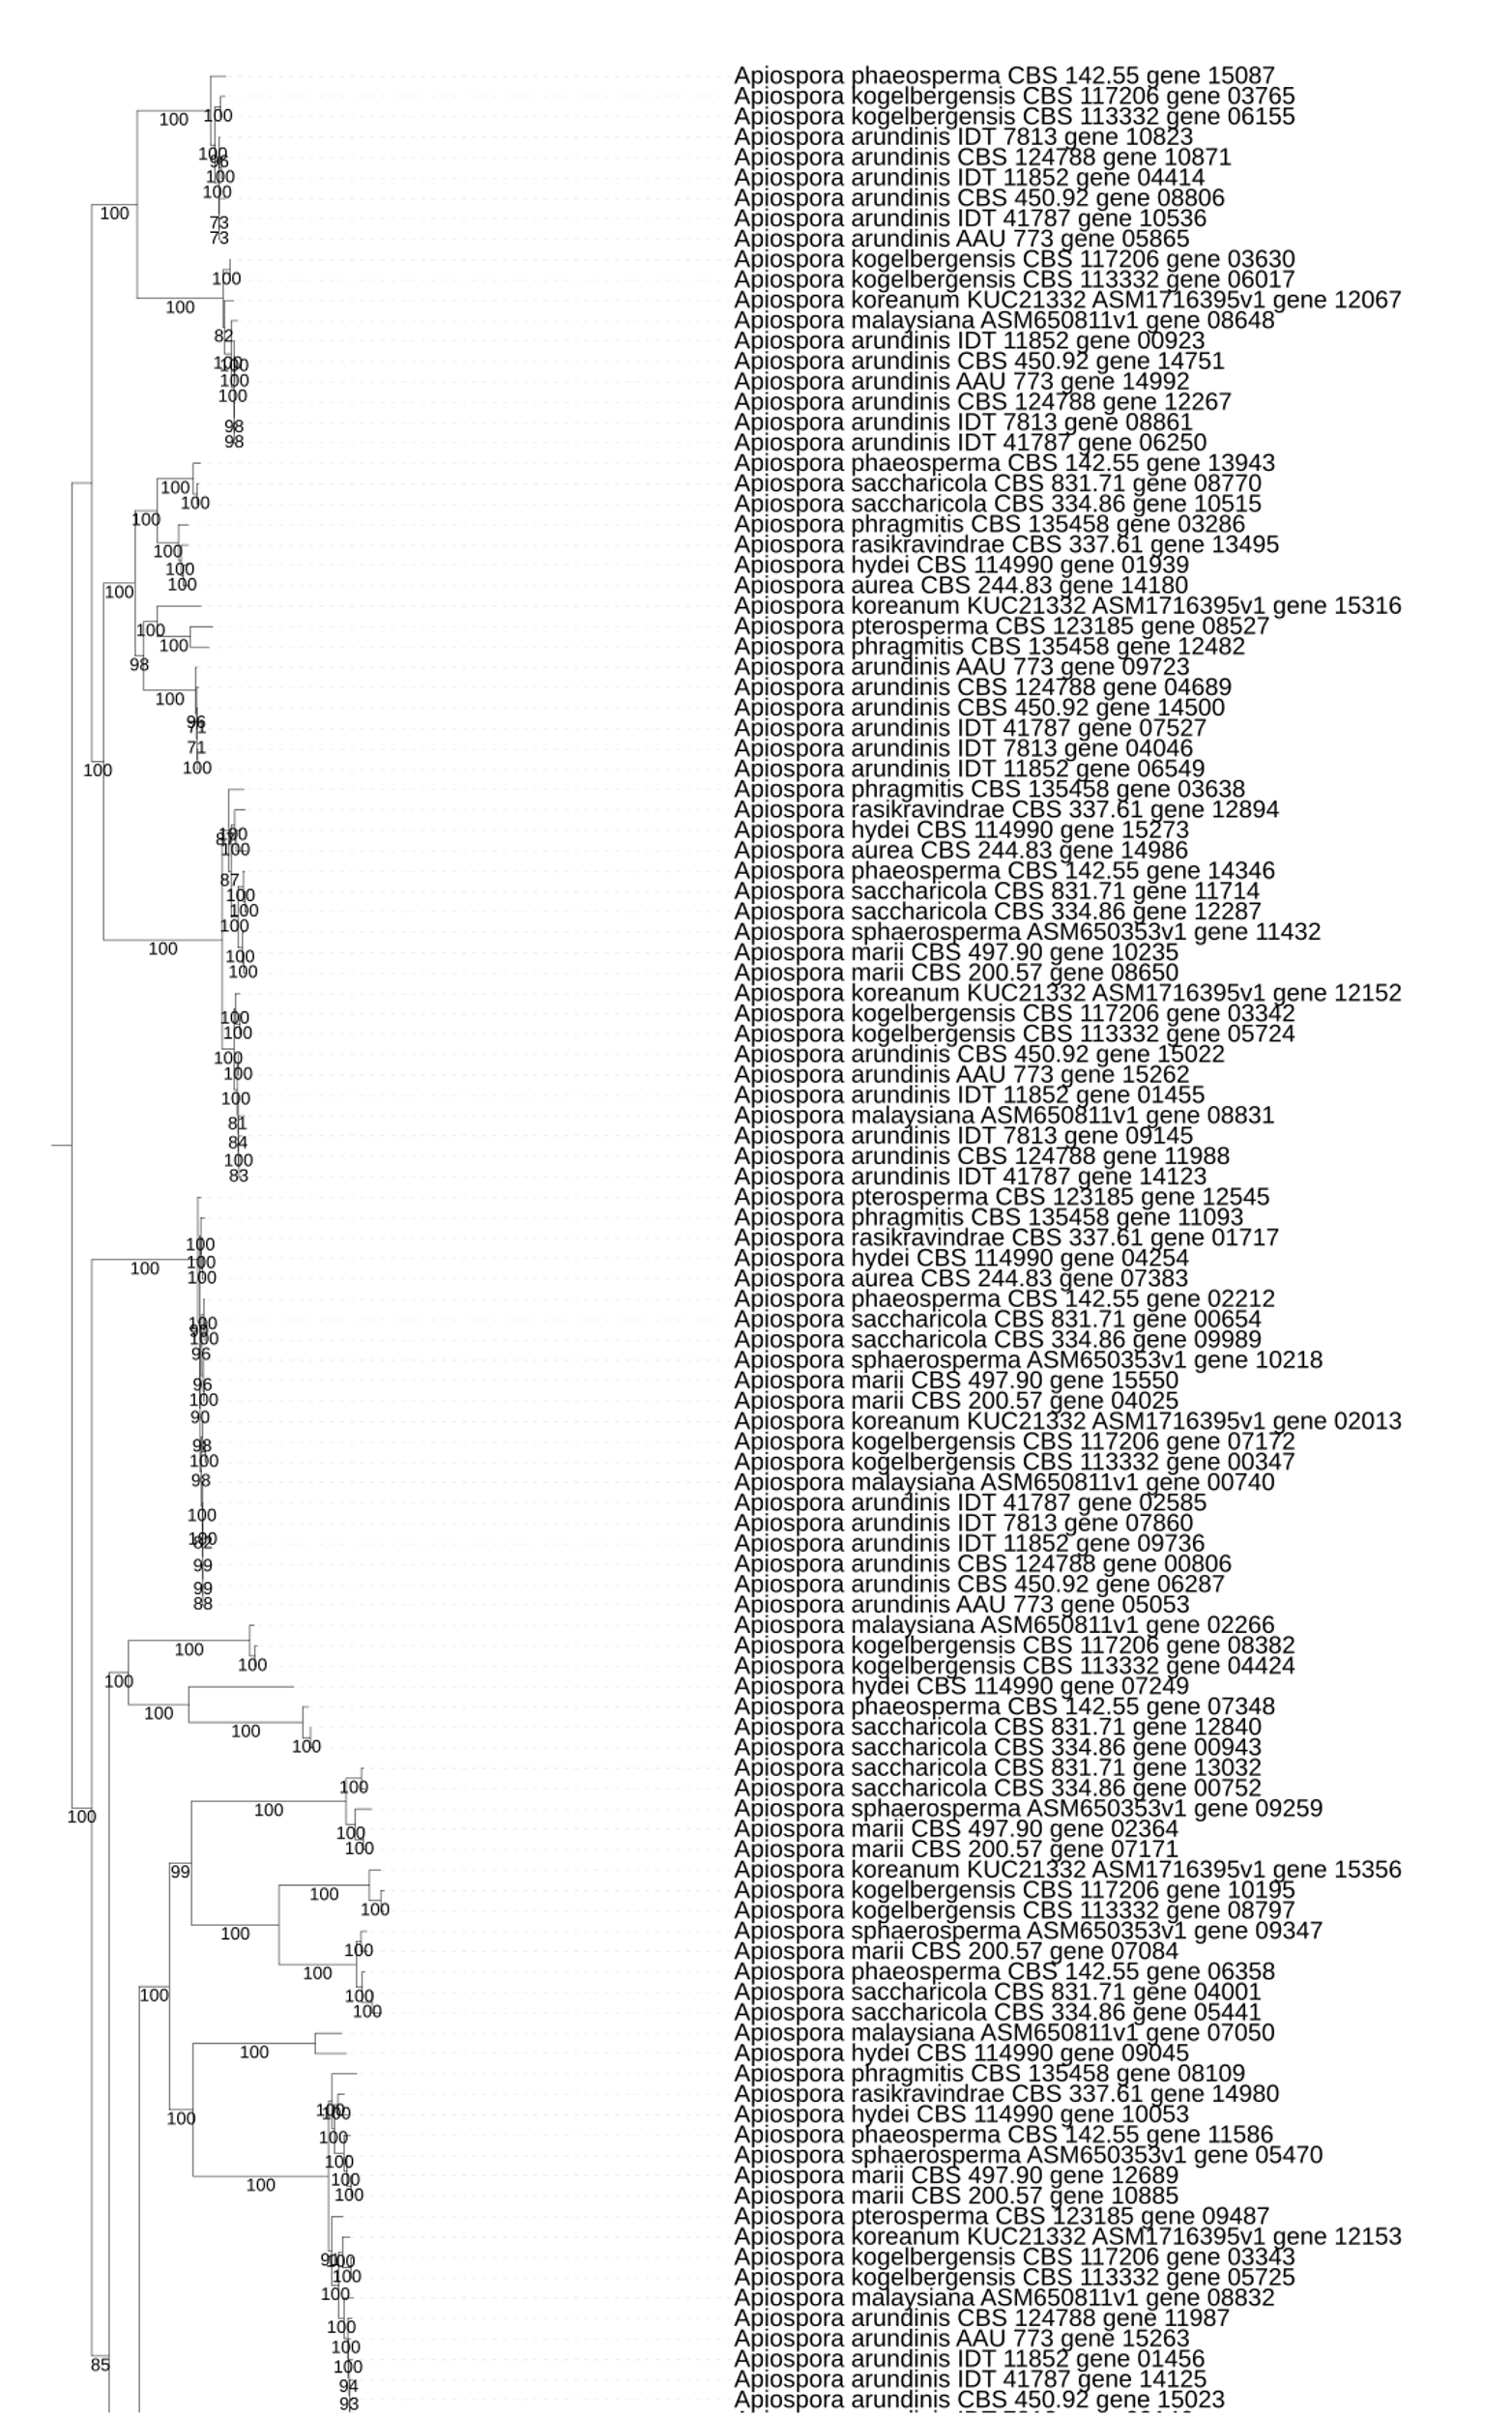


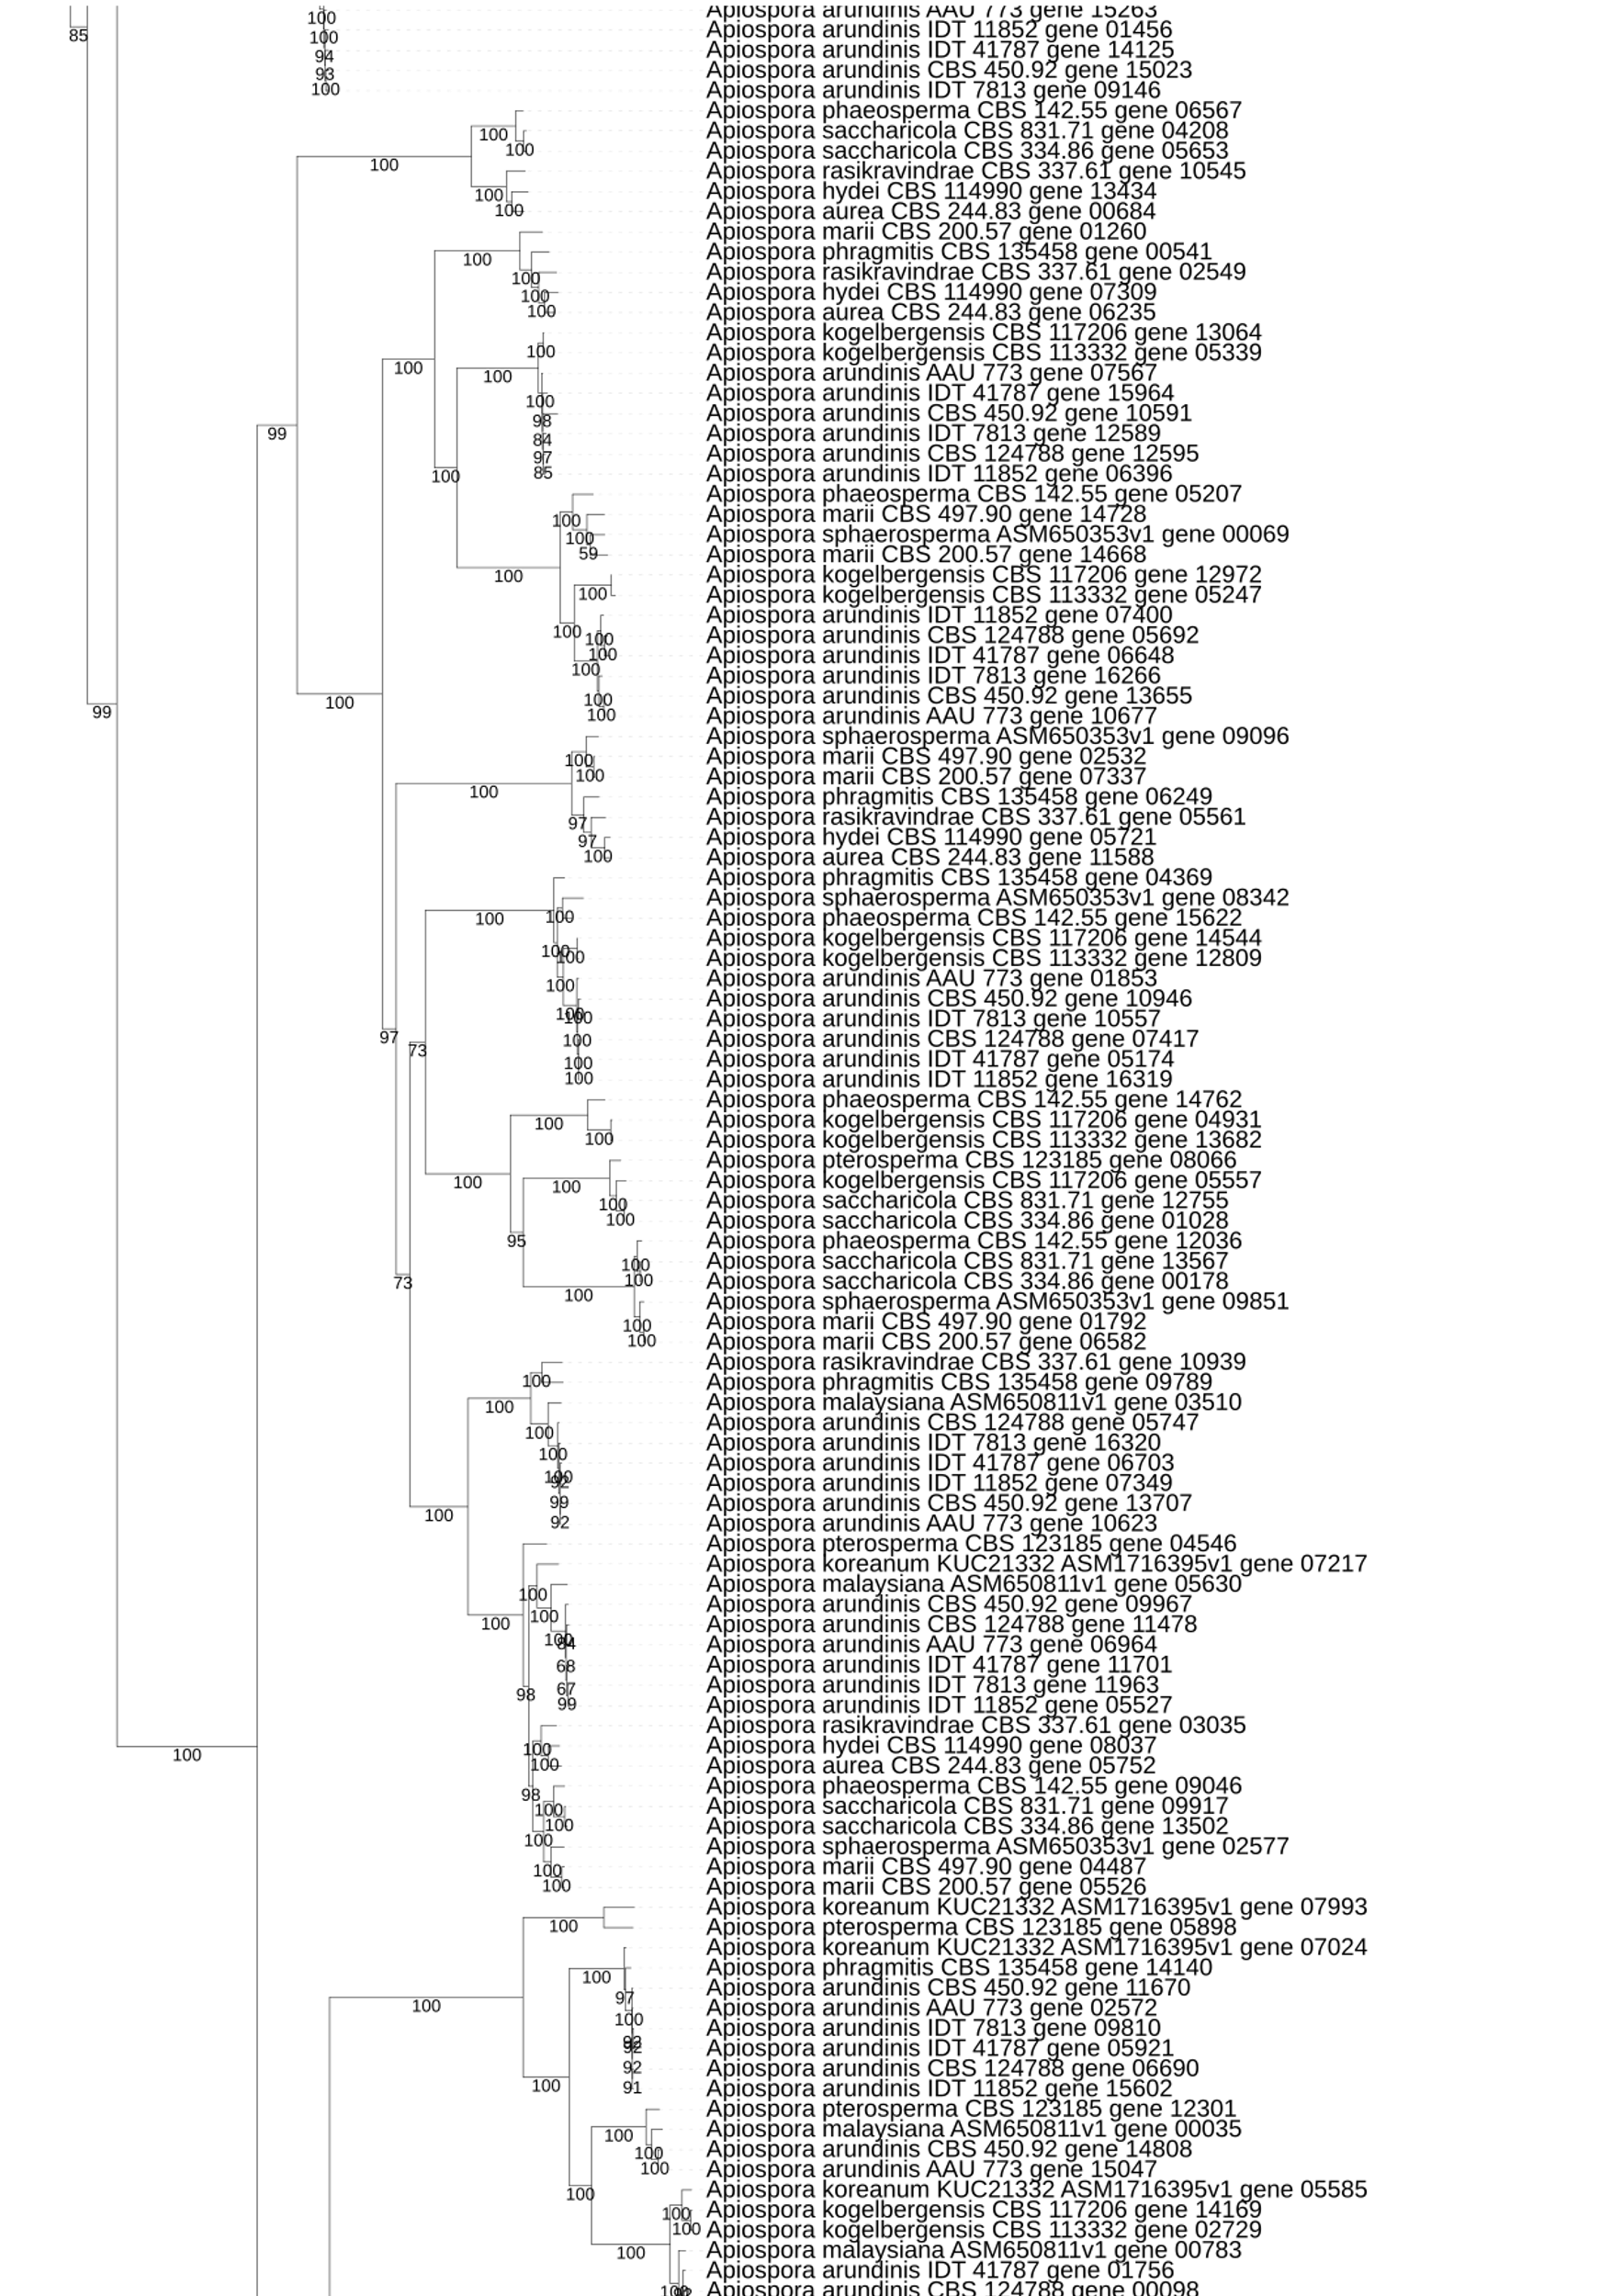


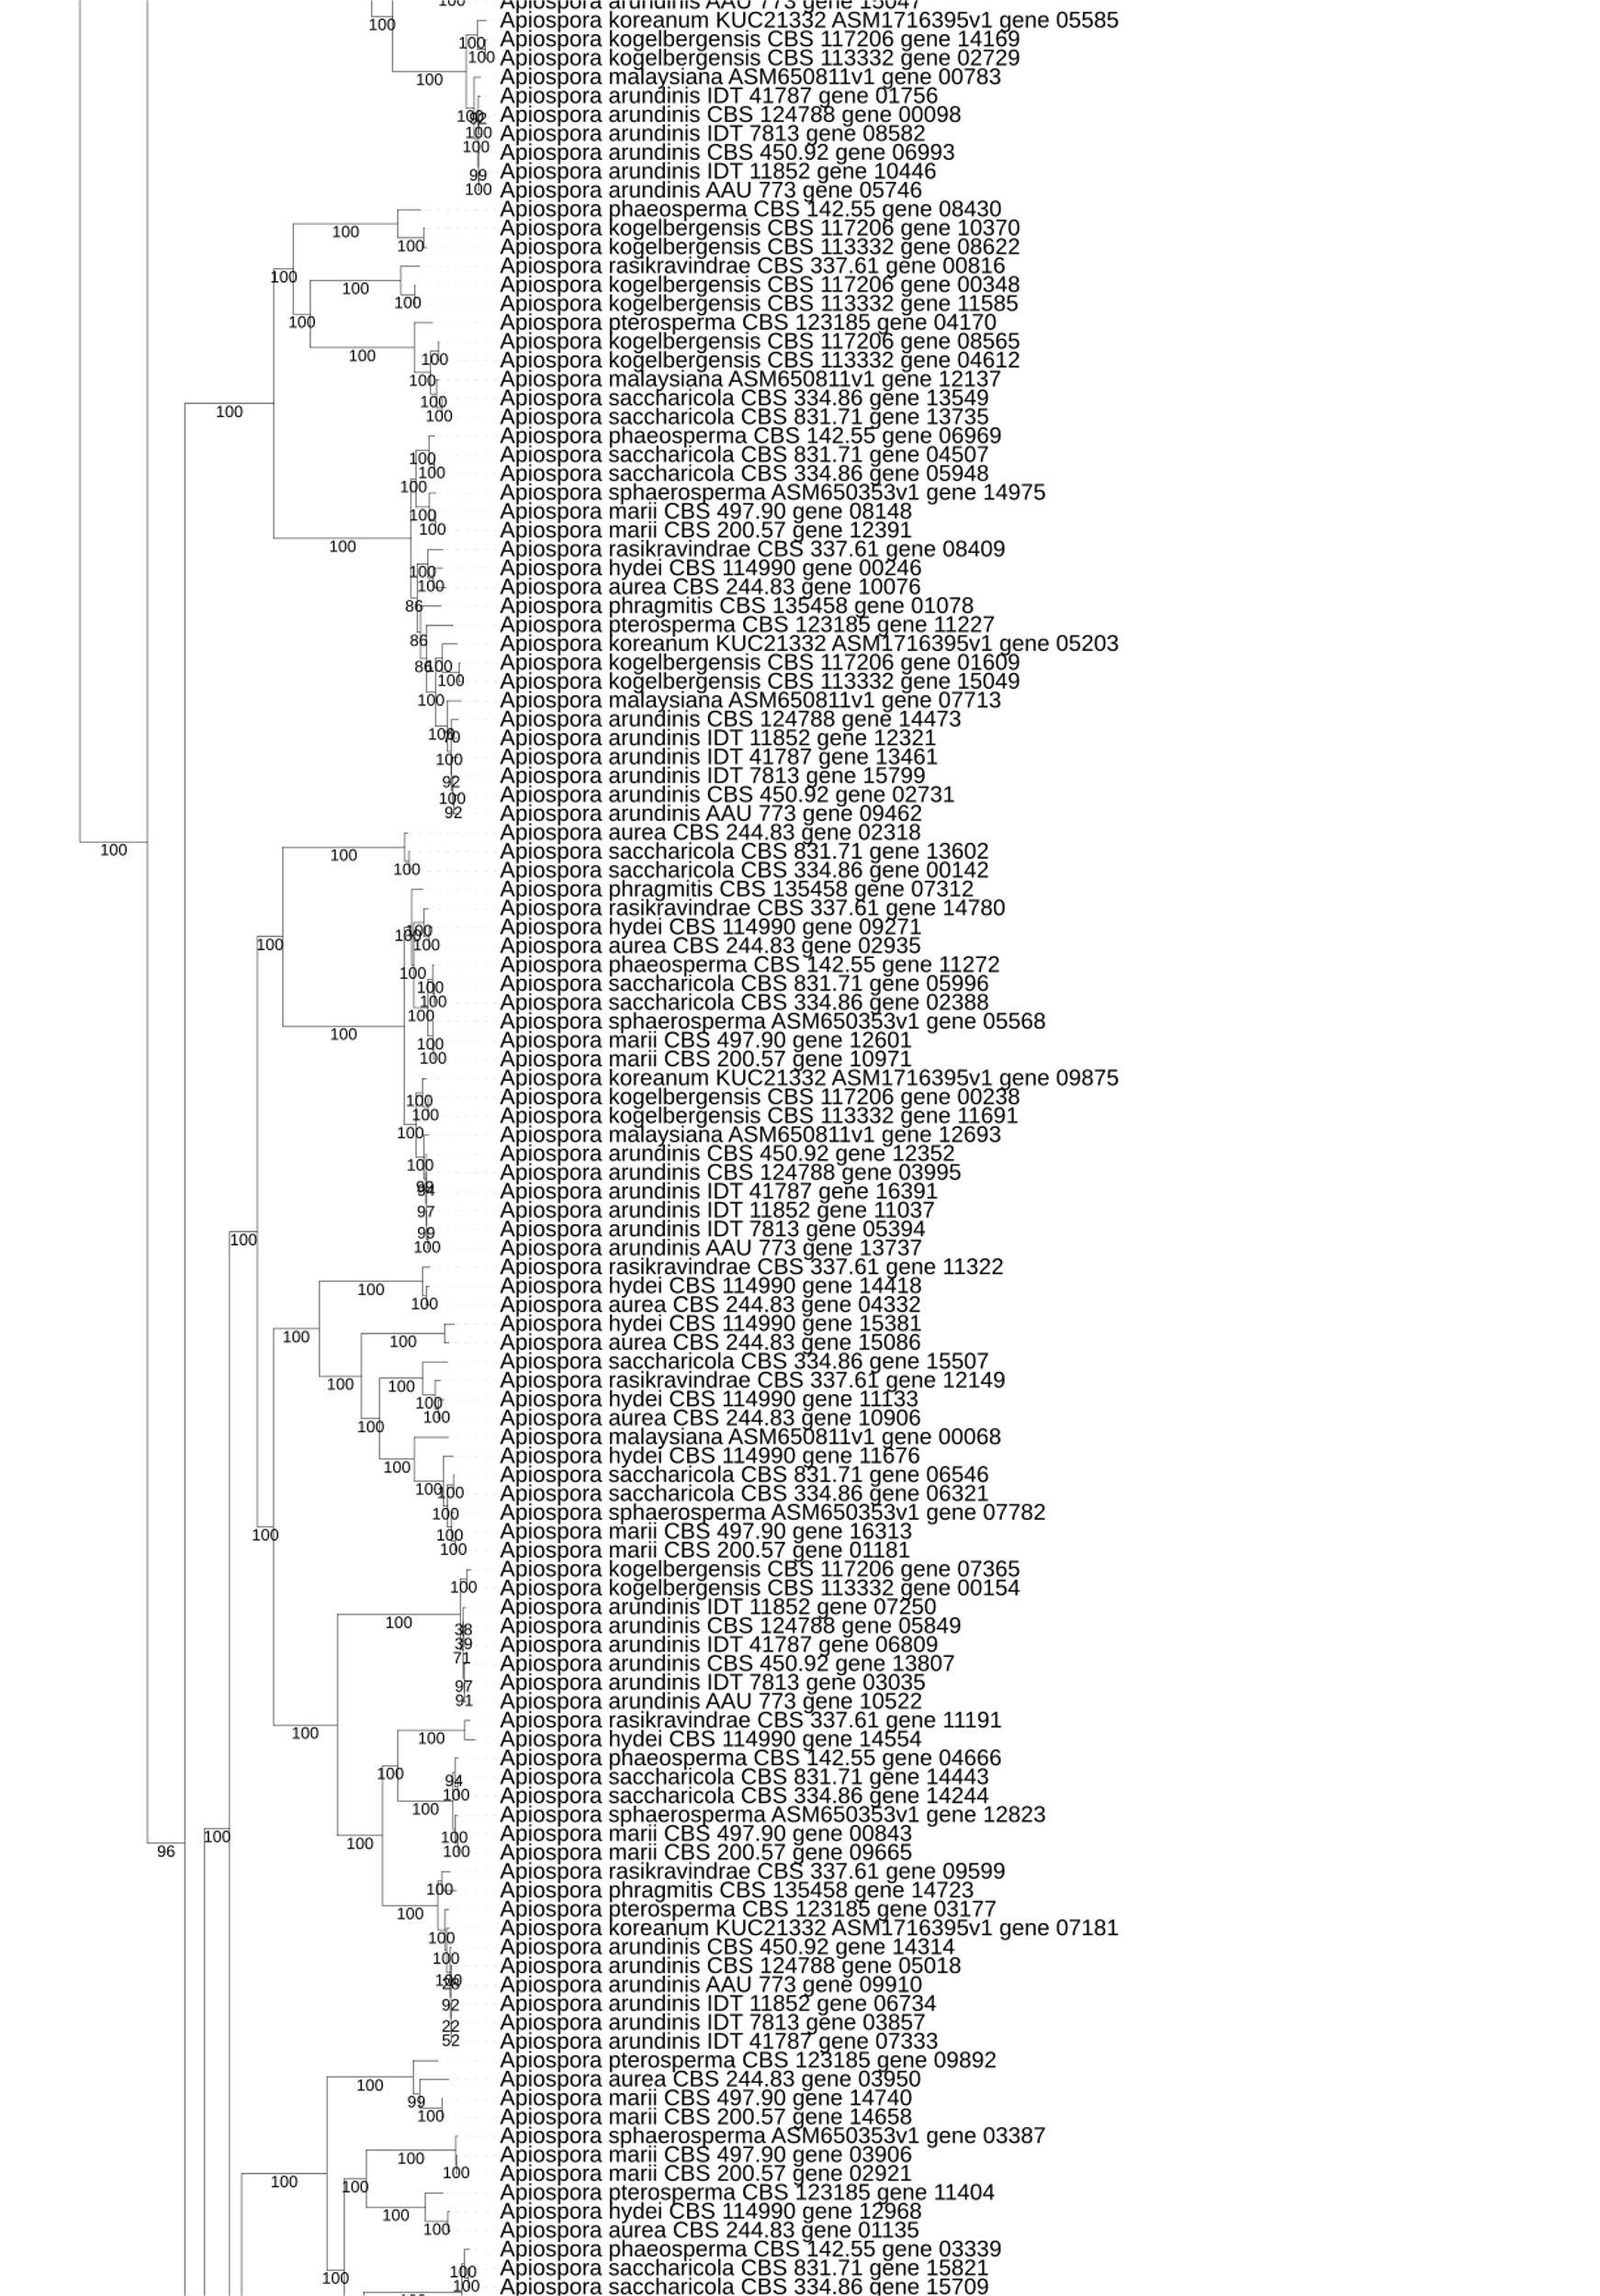


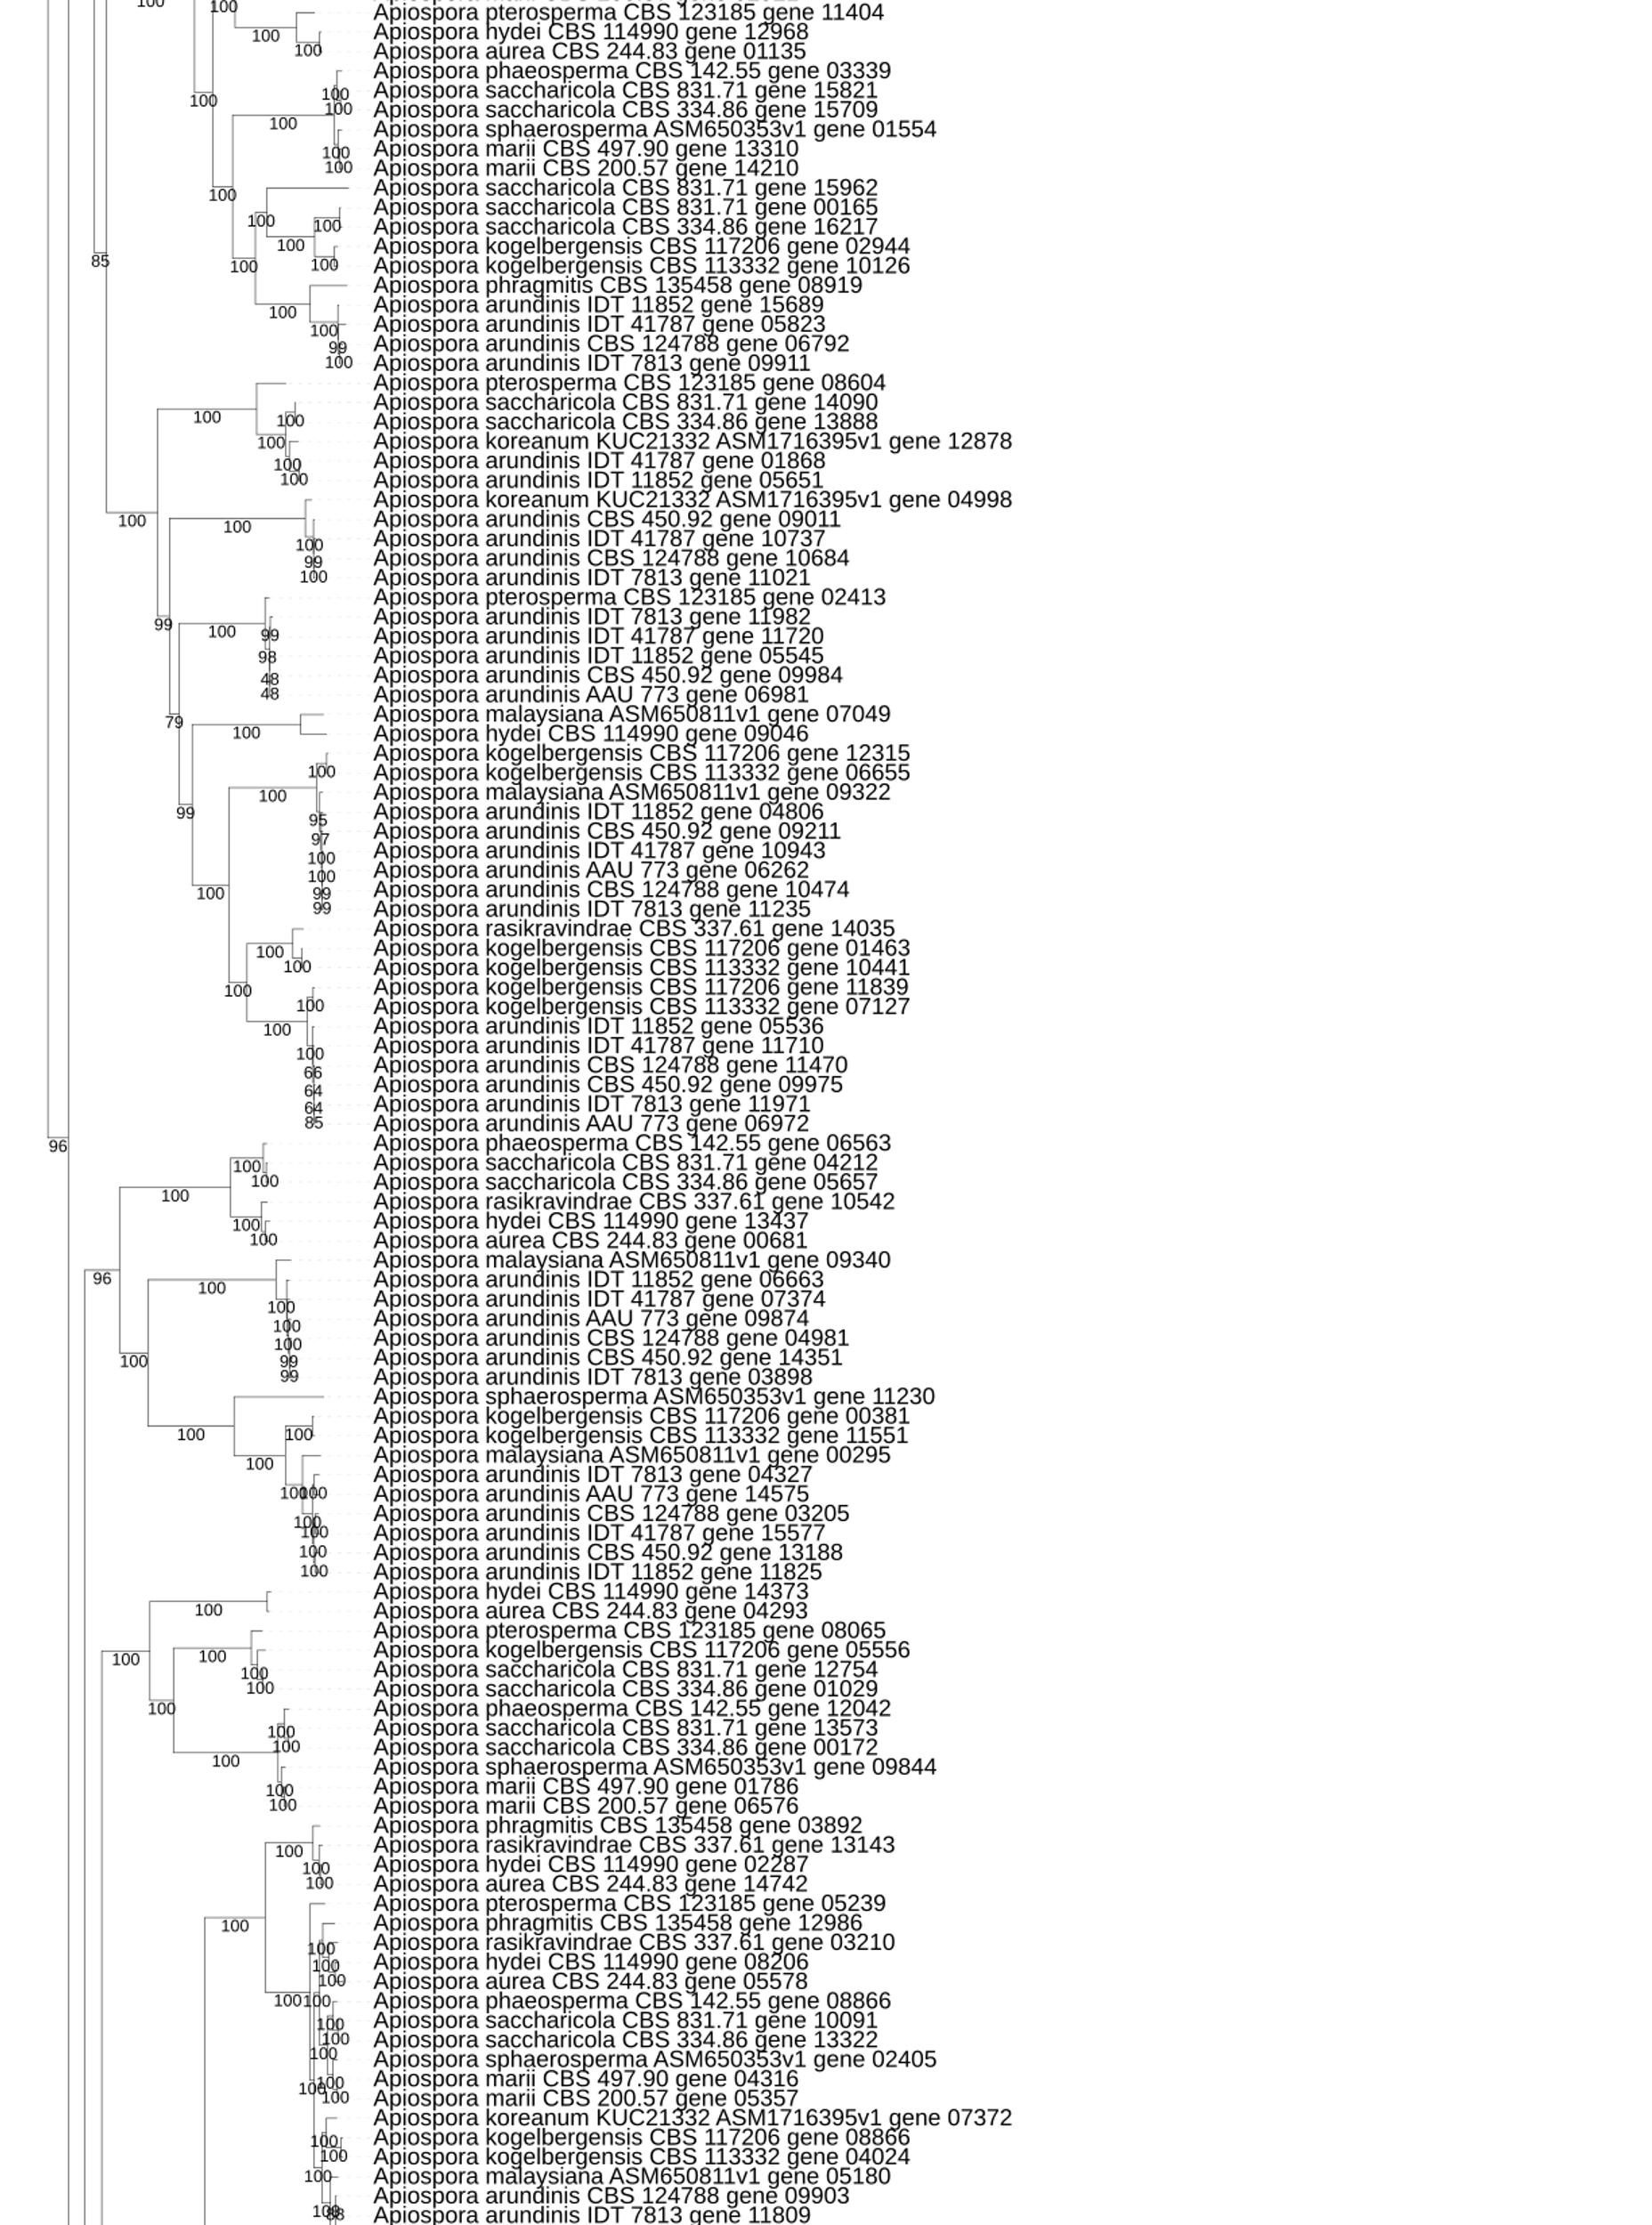


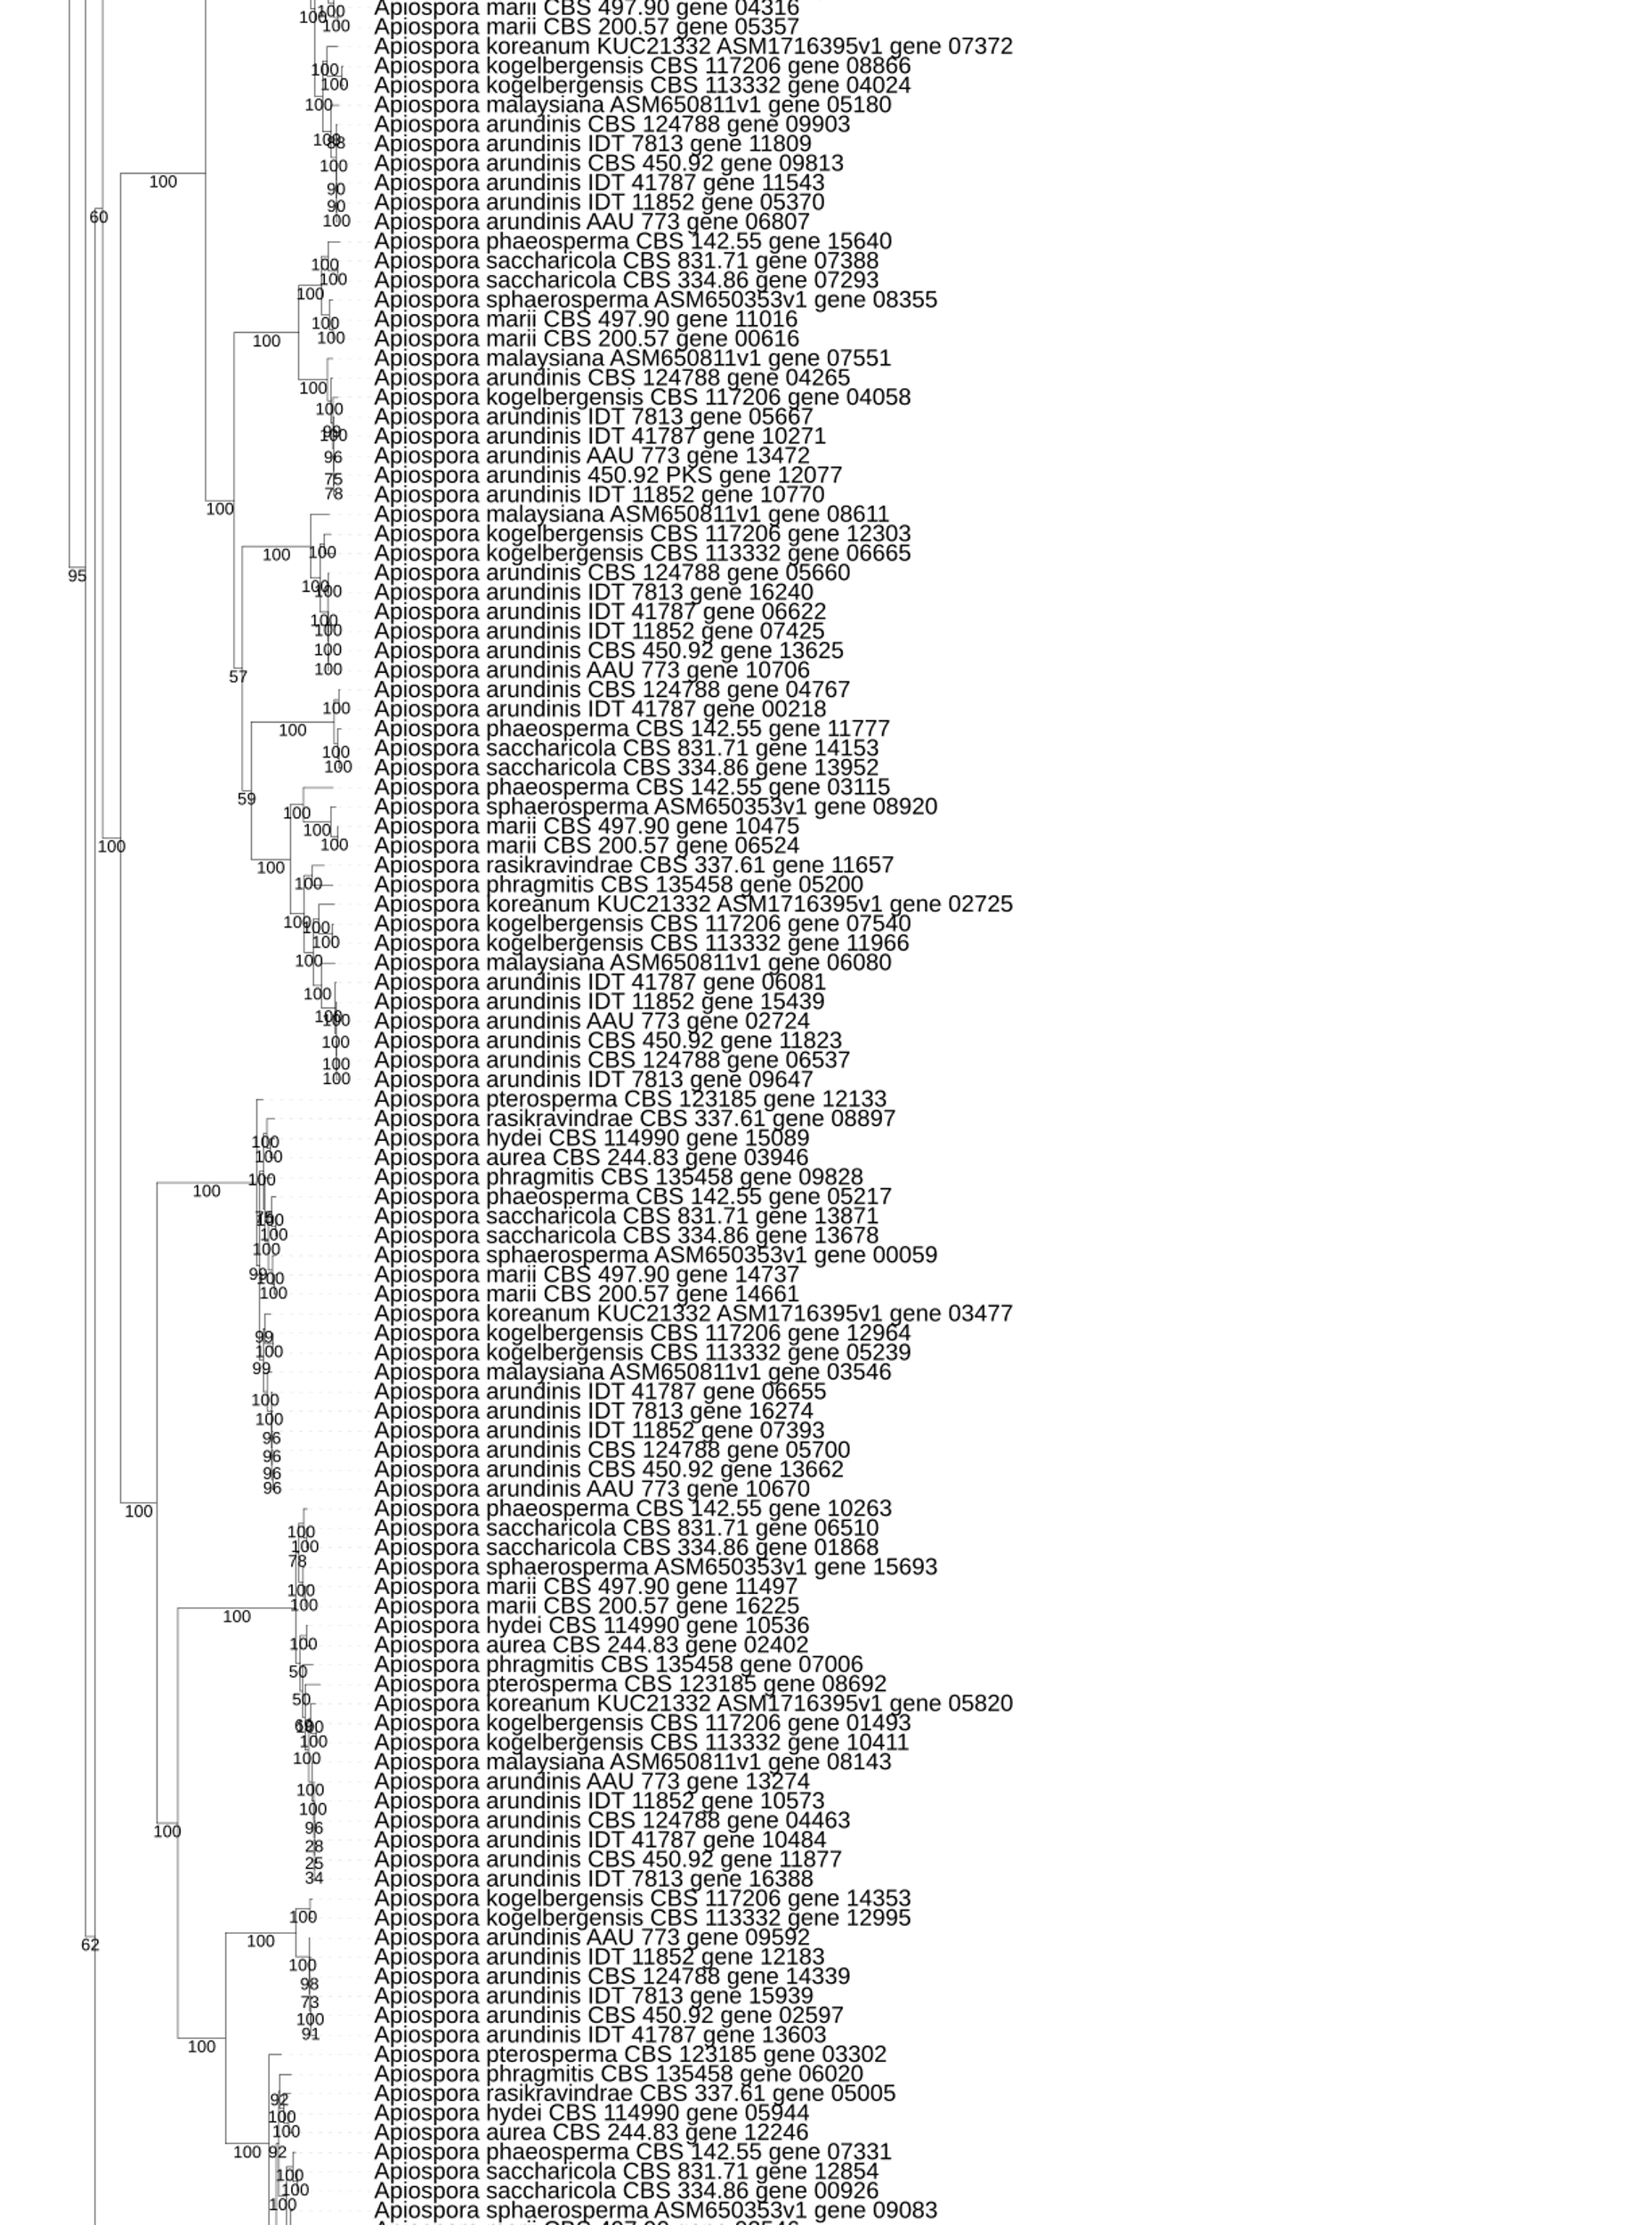


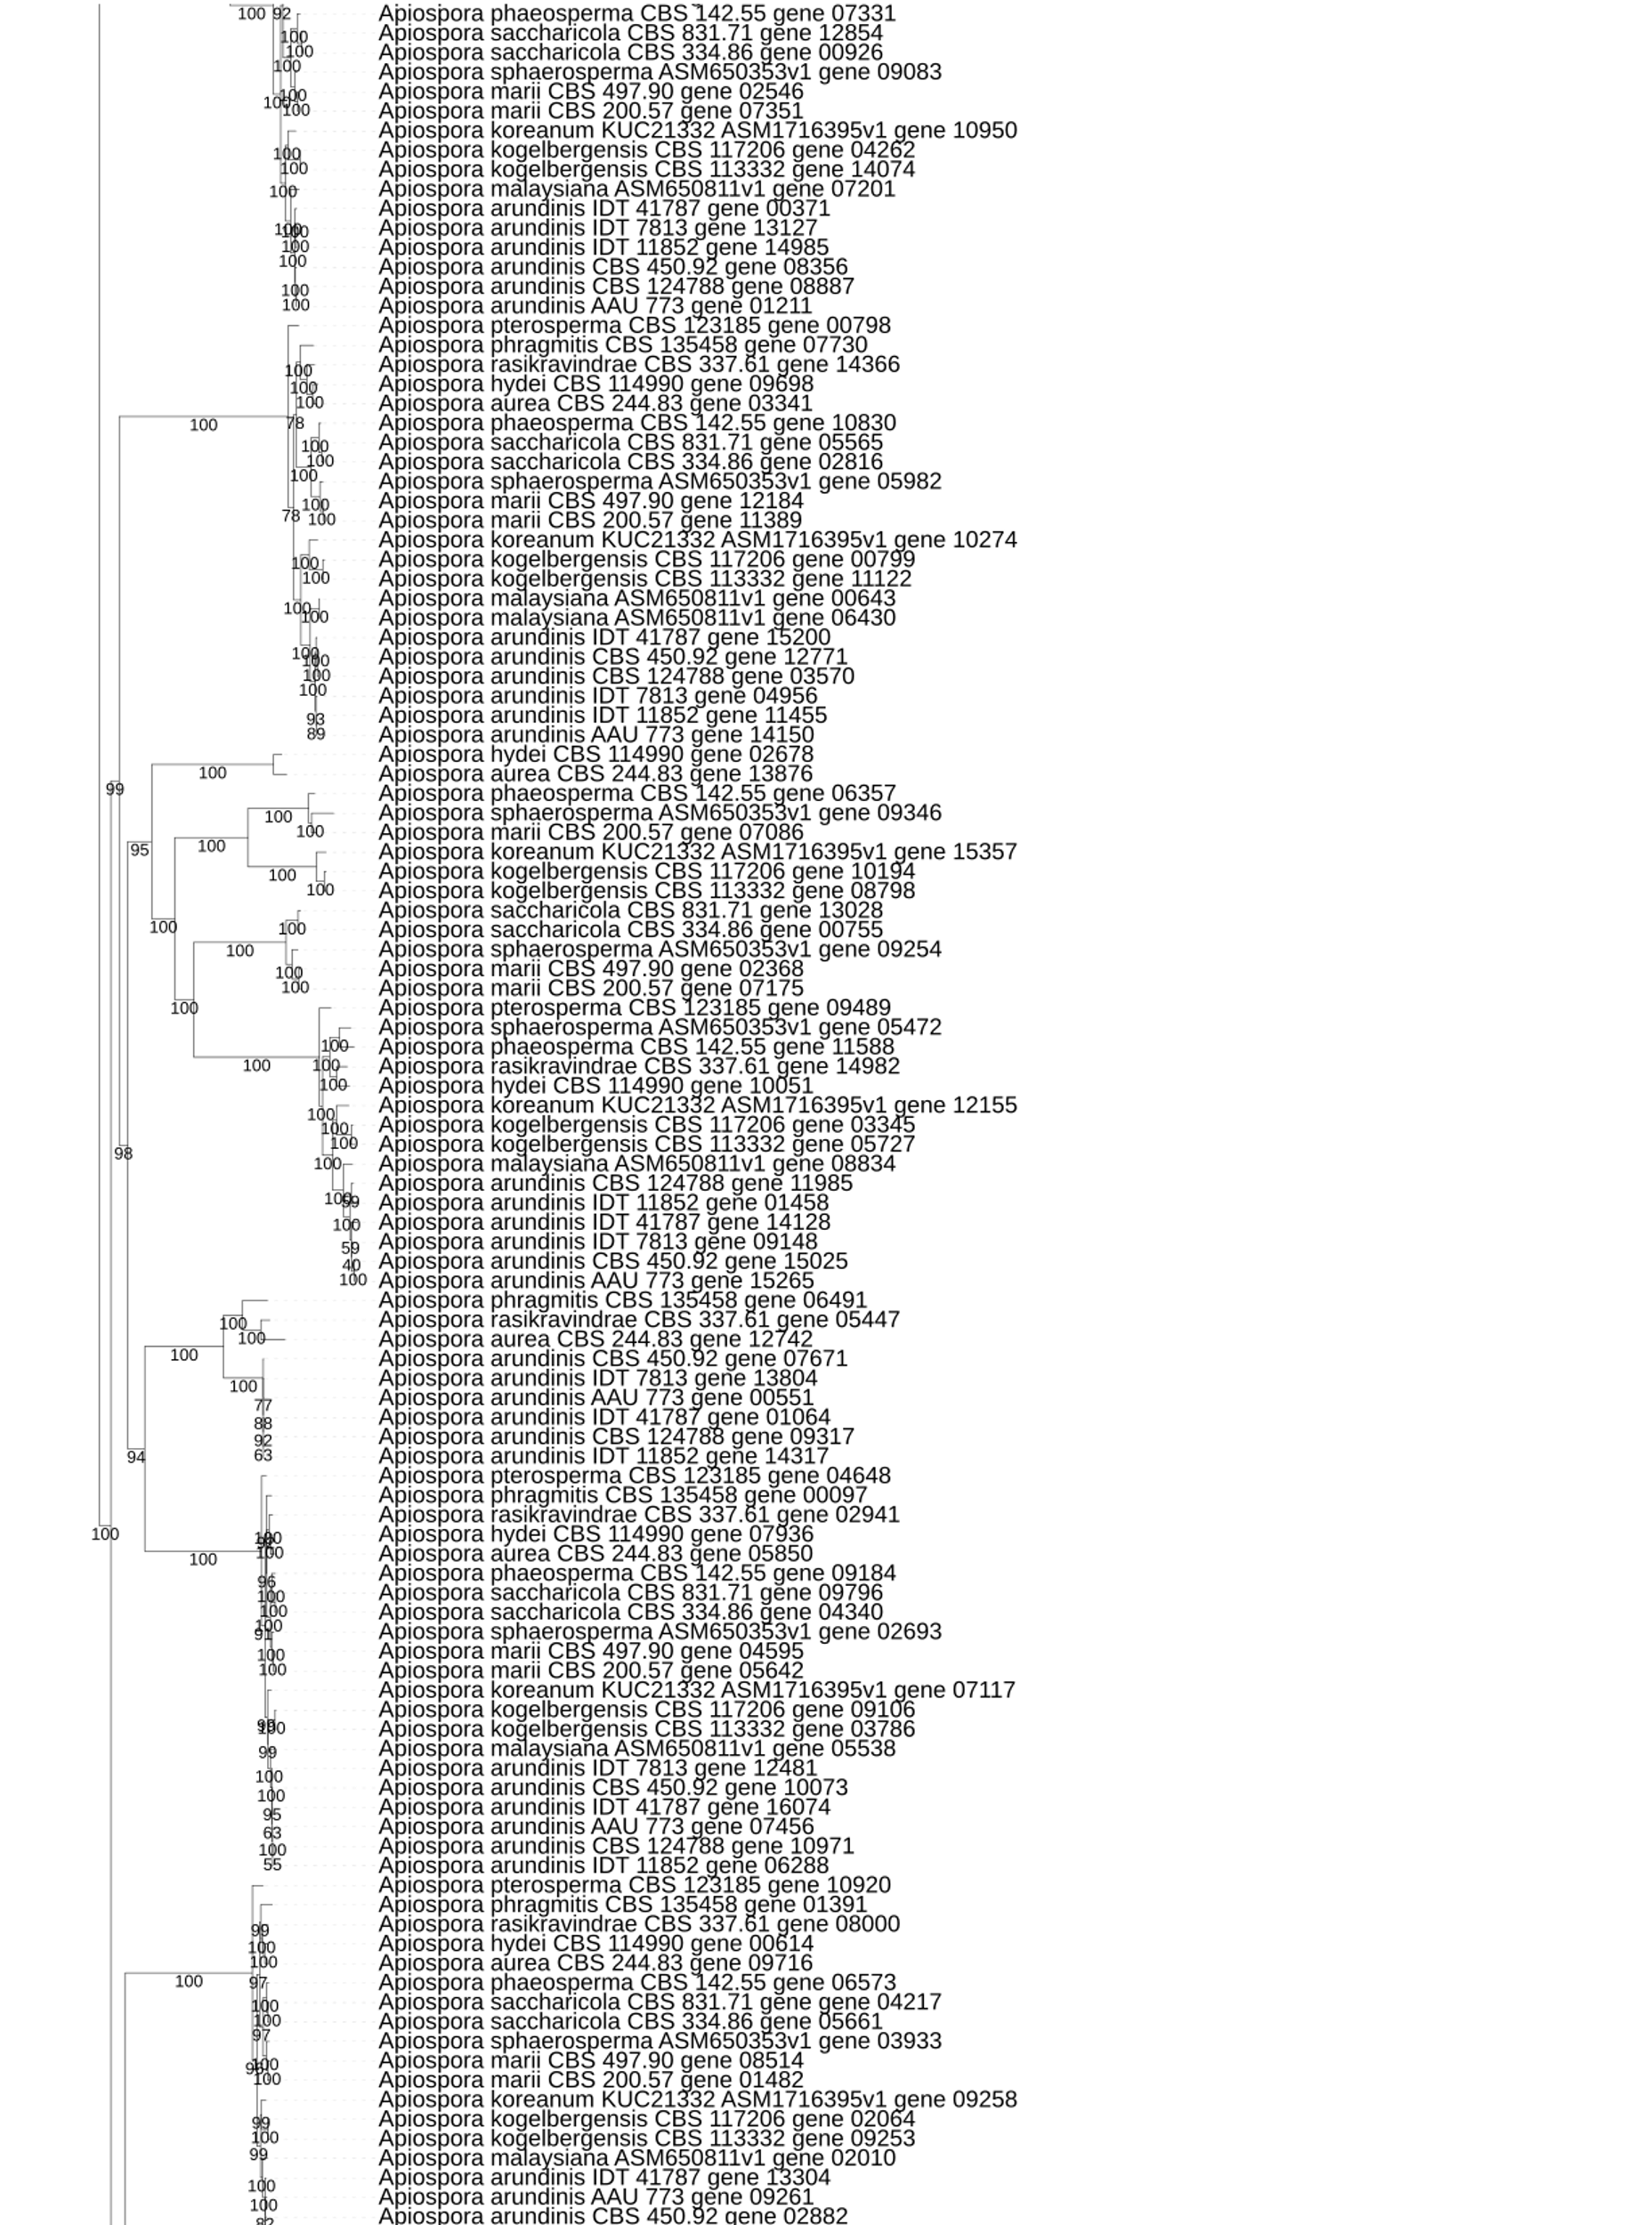


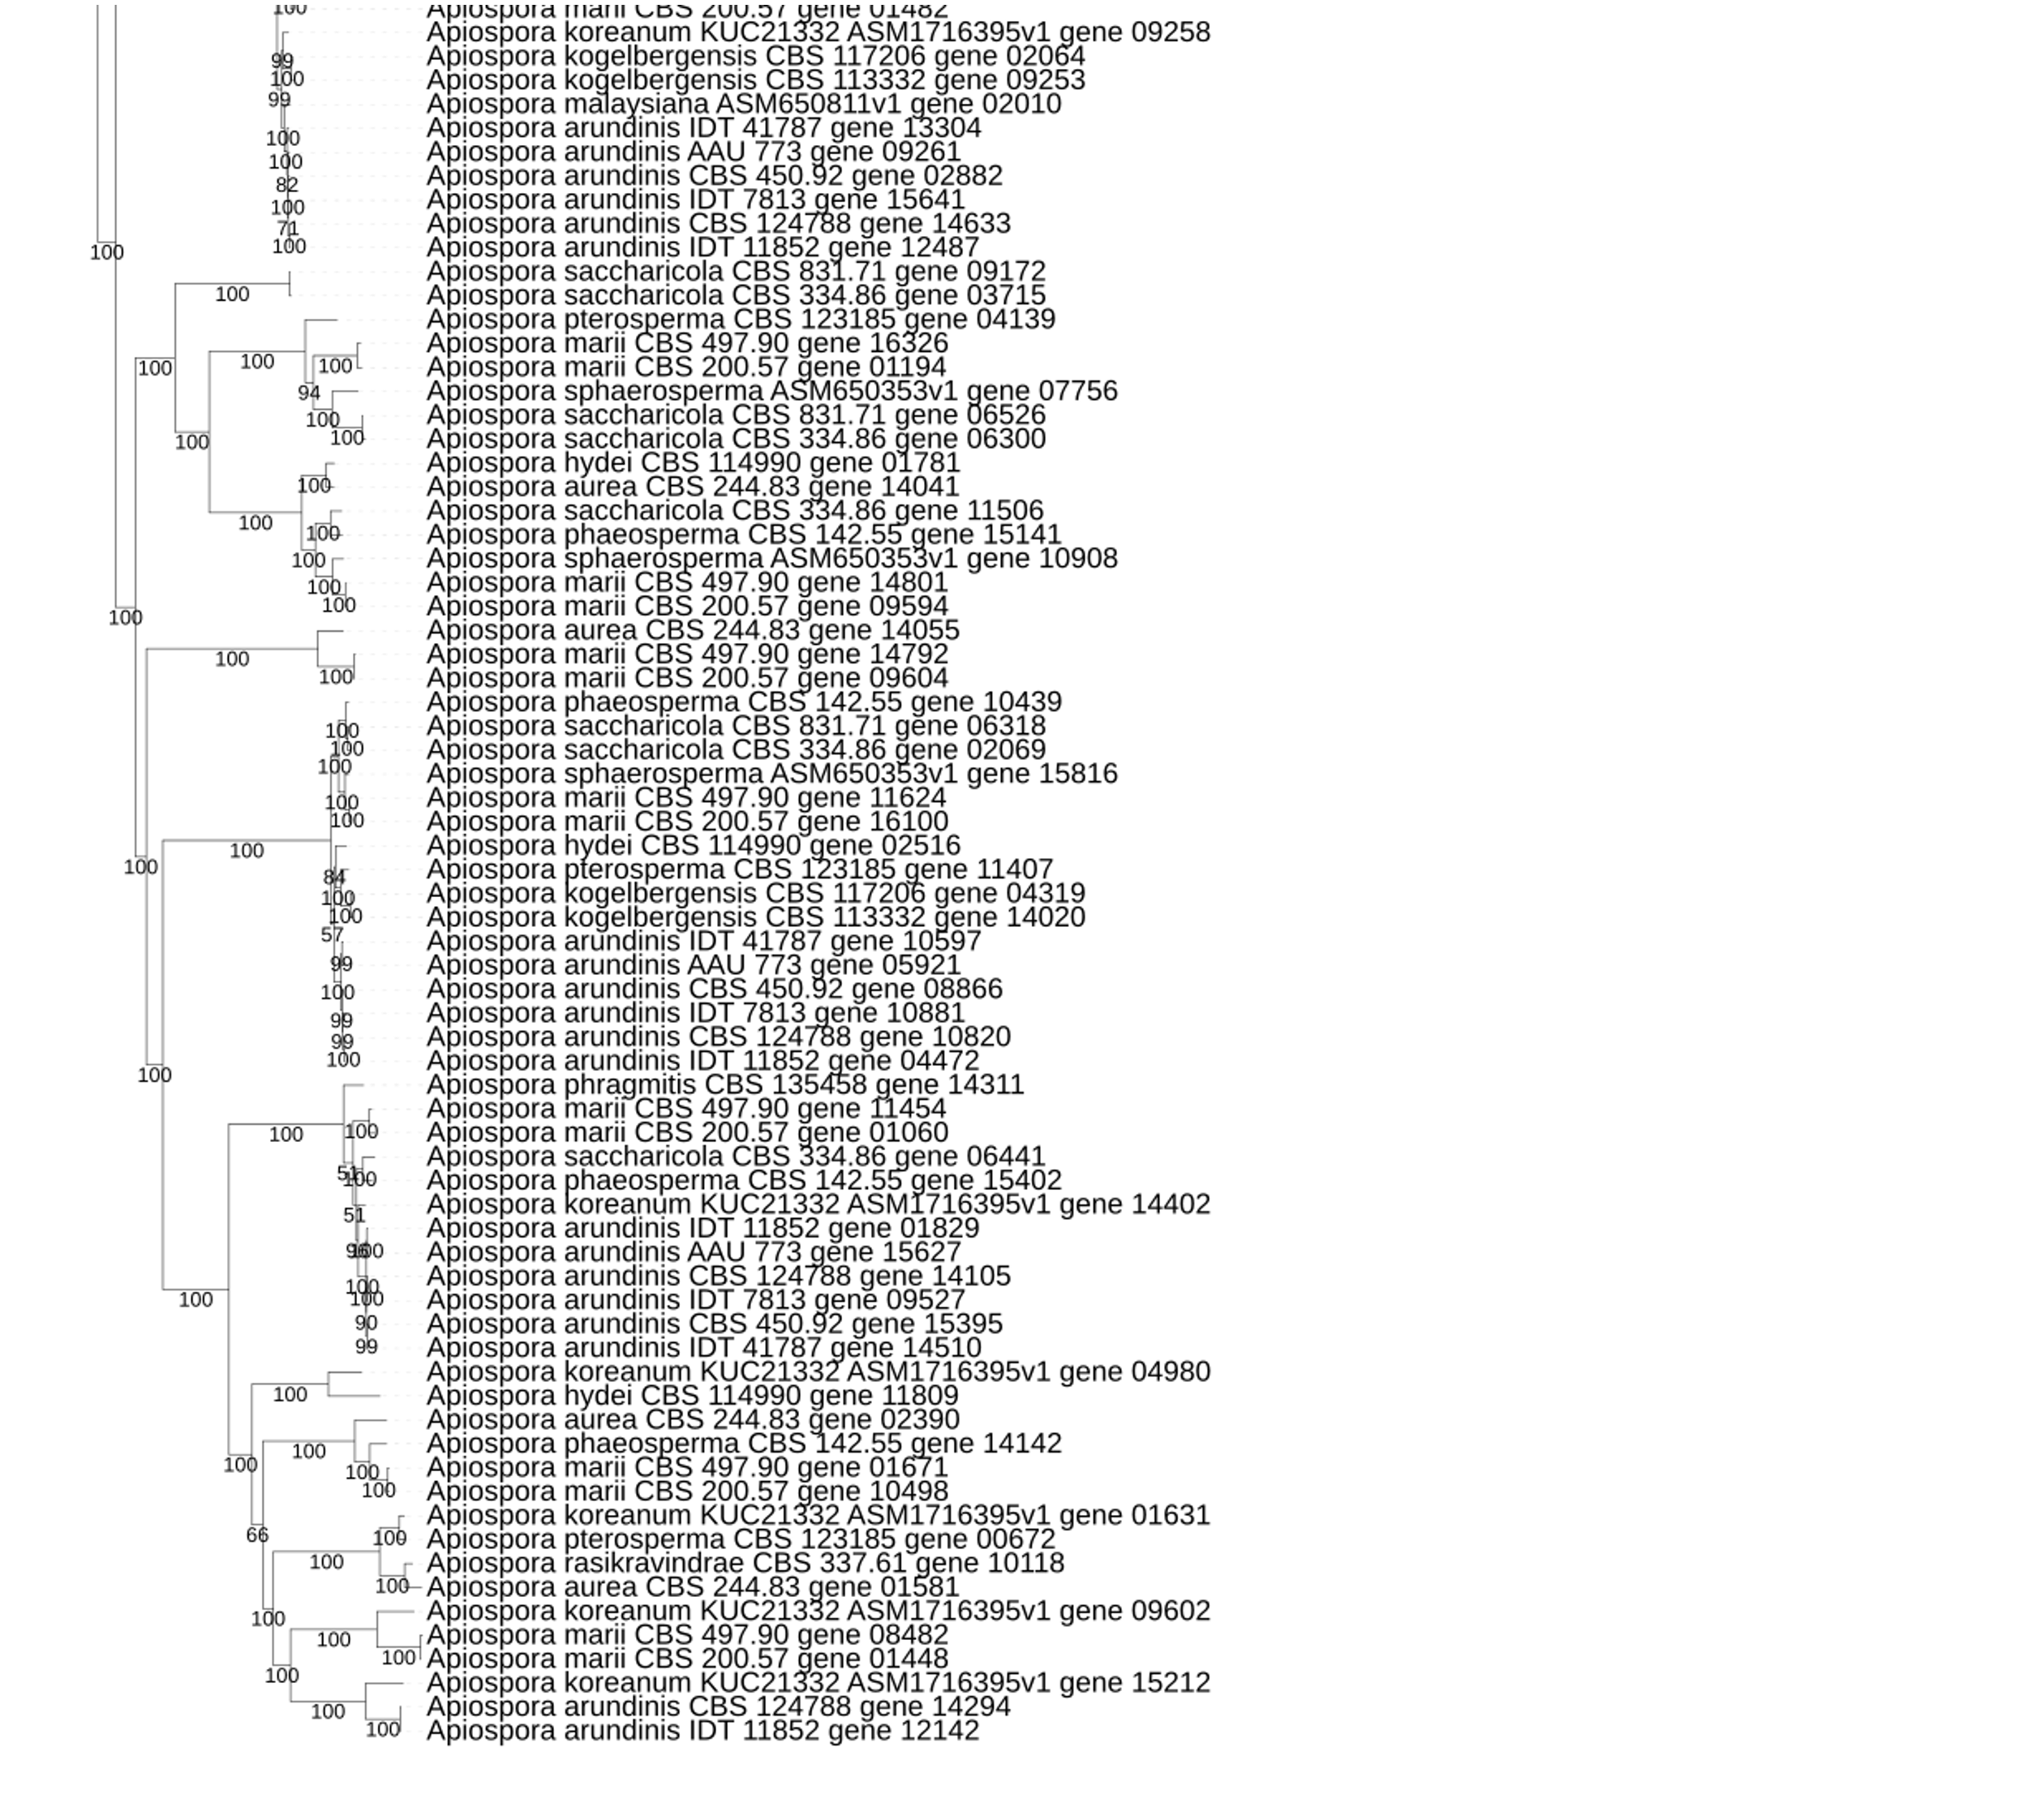


Figure S8 – Phylogenetic analysis of the PKS core genes located in the 21 Apiospora genome assemblies.


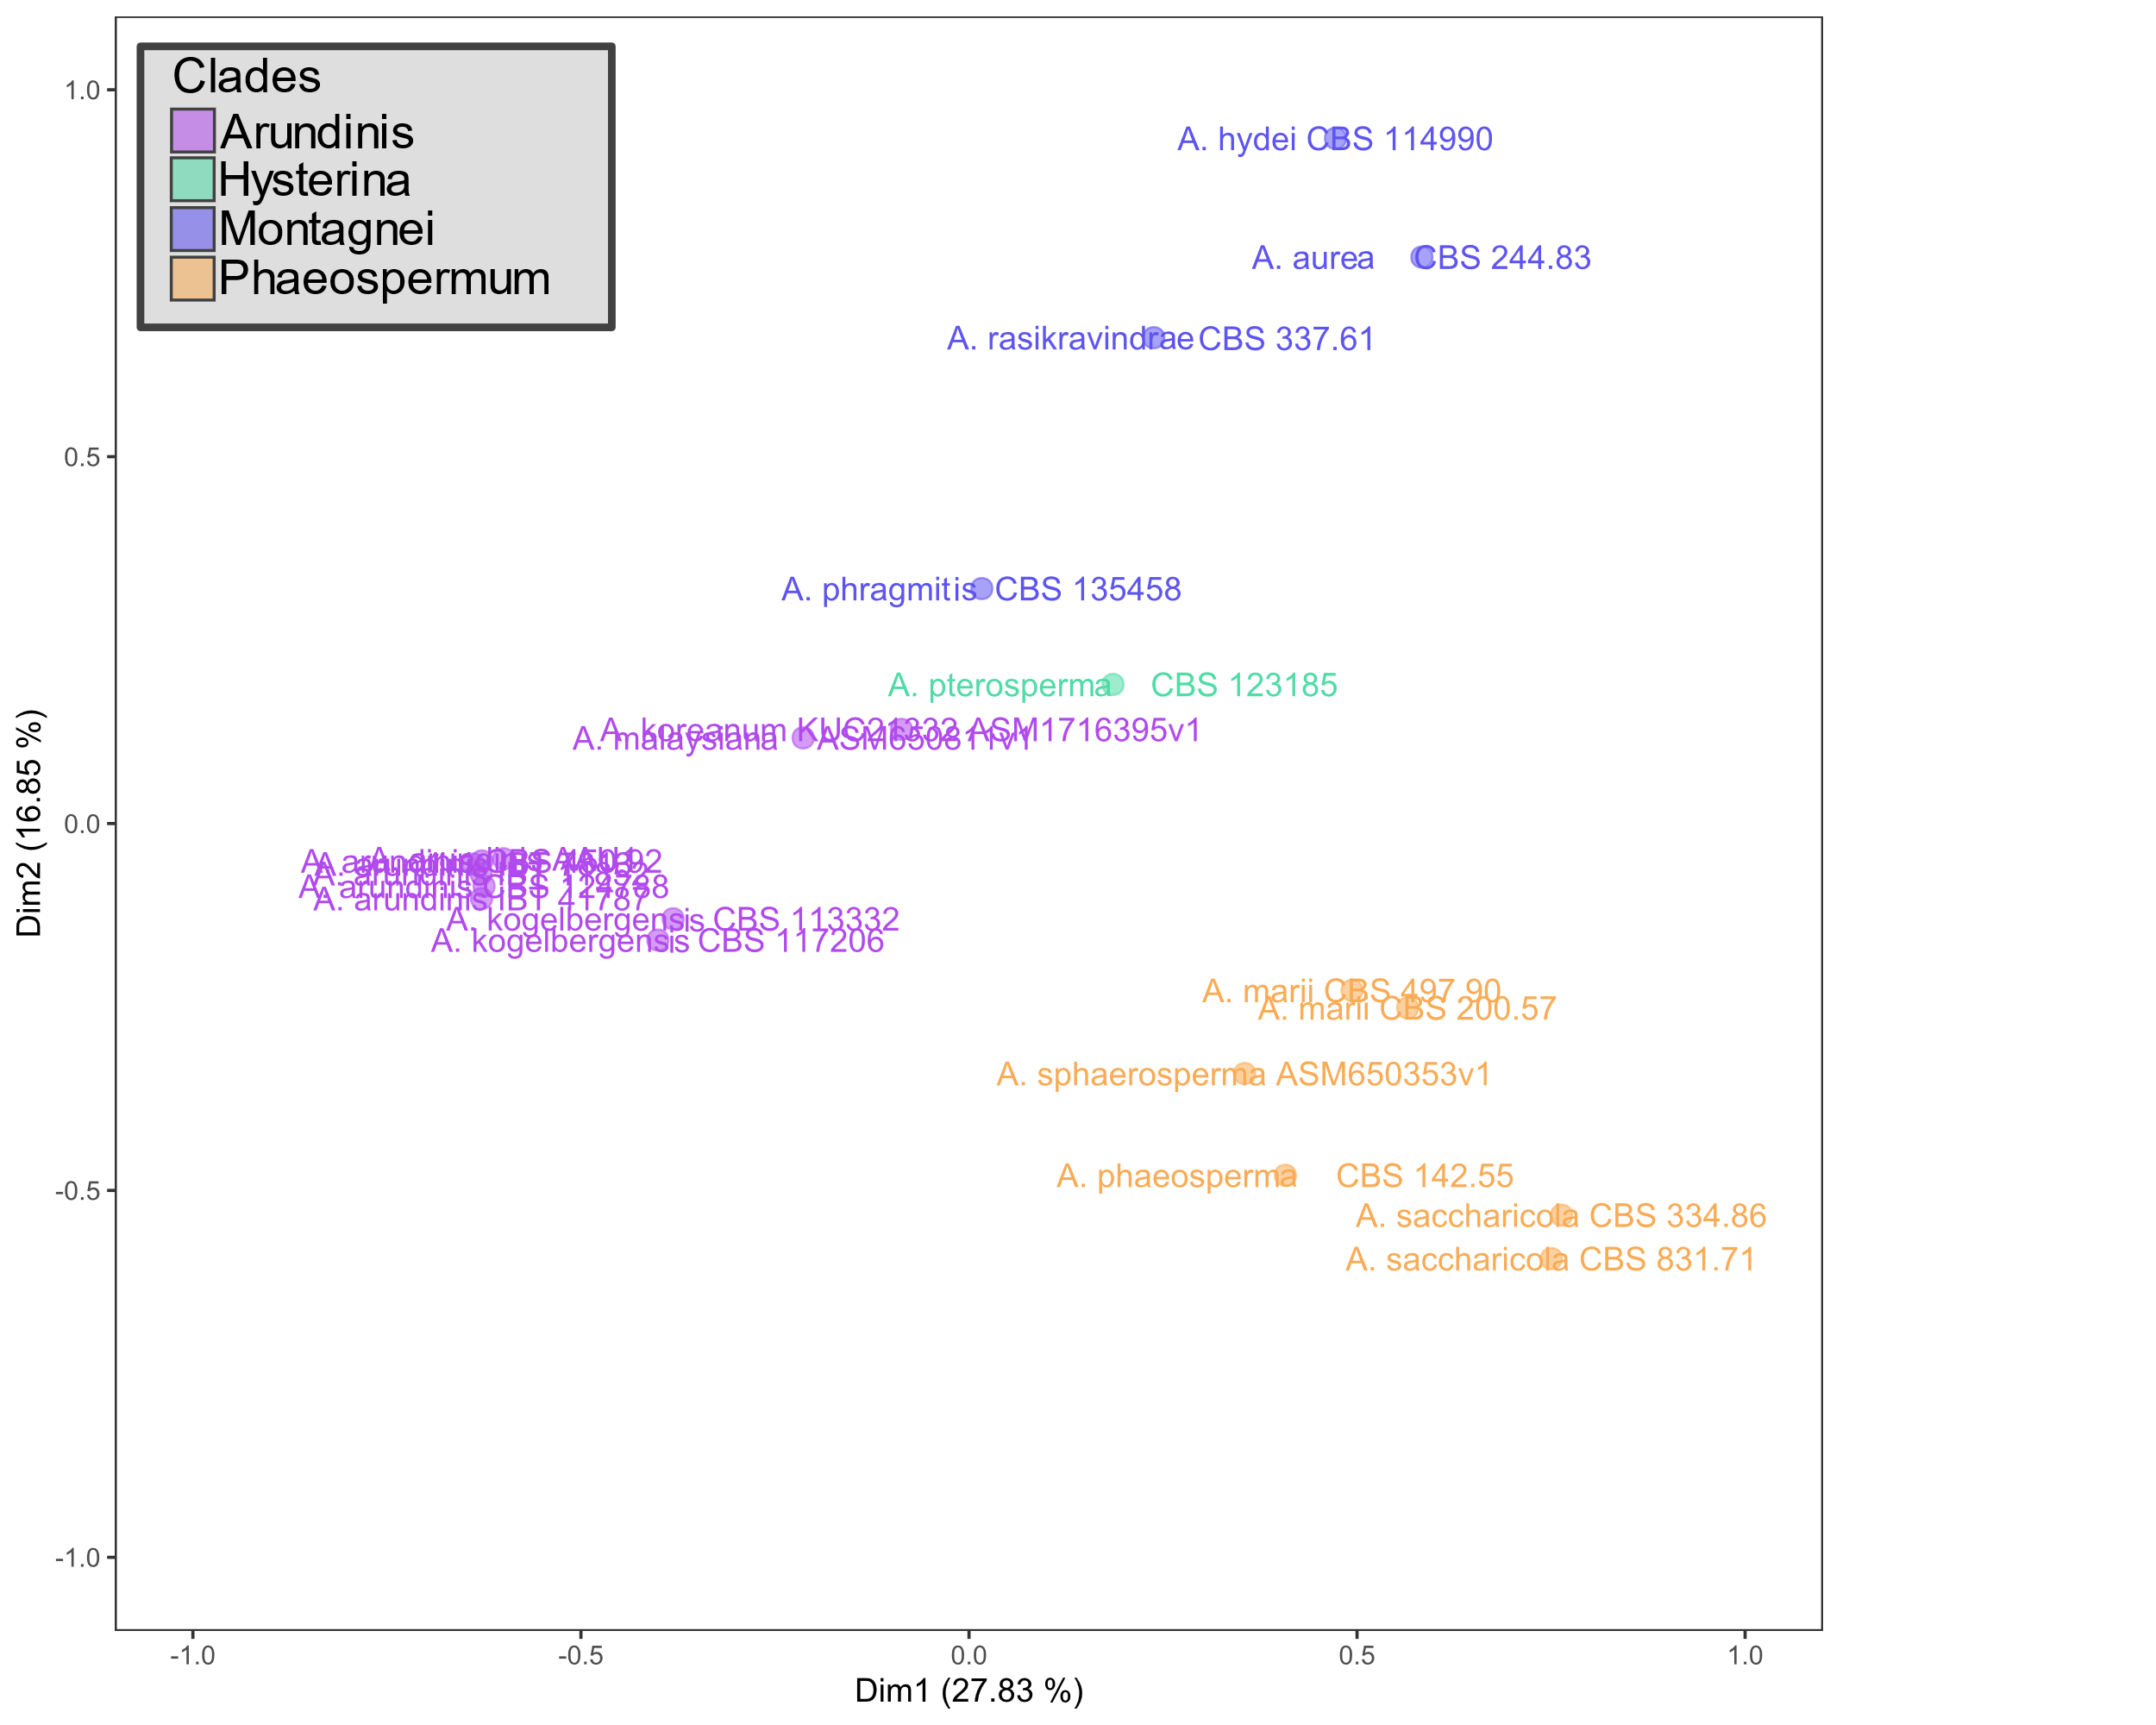


Figure S9 – MCA analysis of the PKS profiles from all the Apiospora genomes.


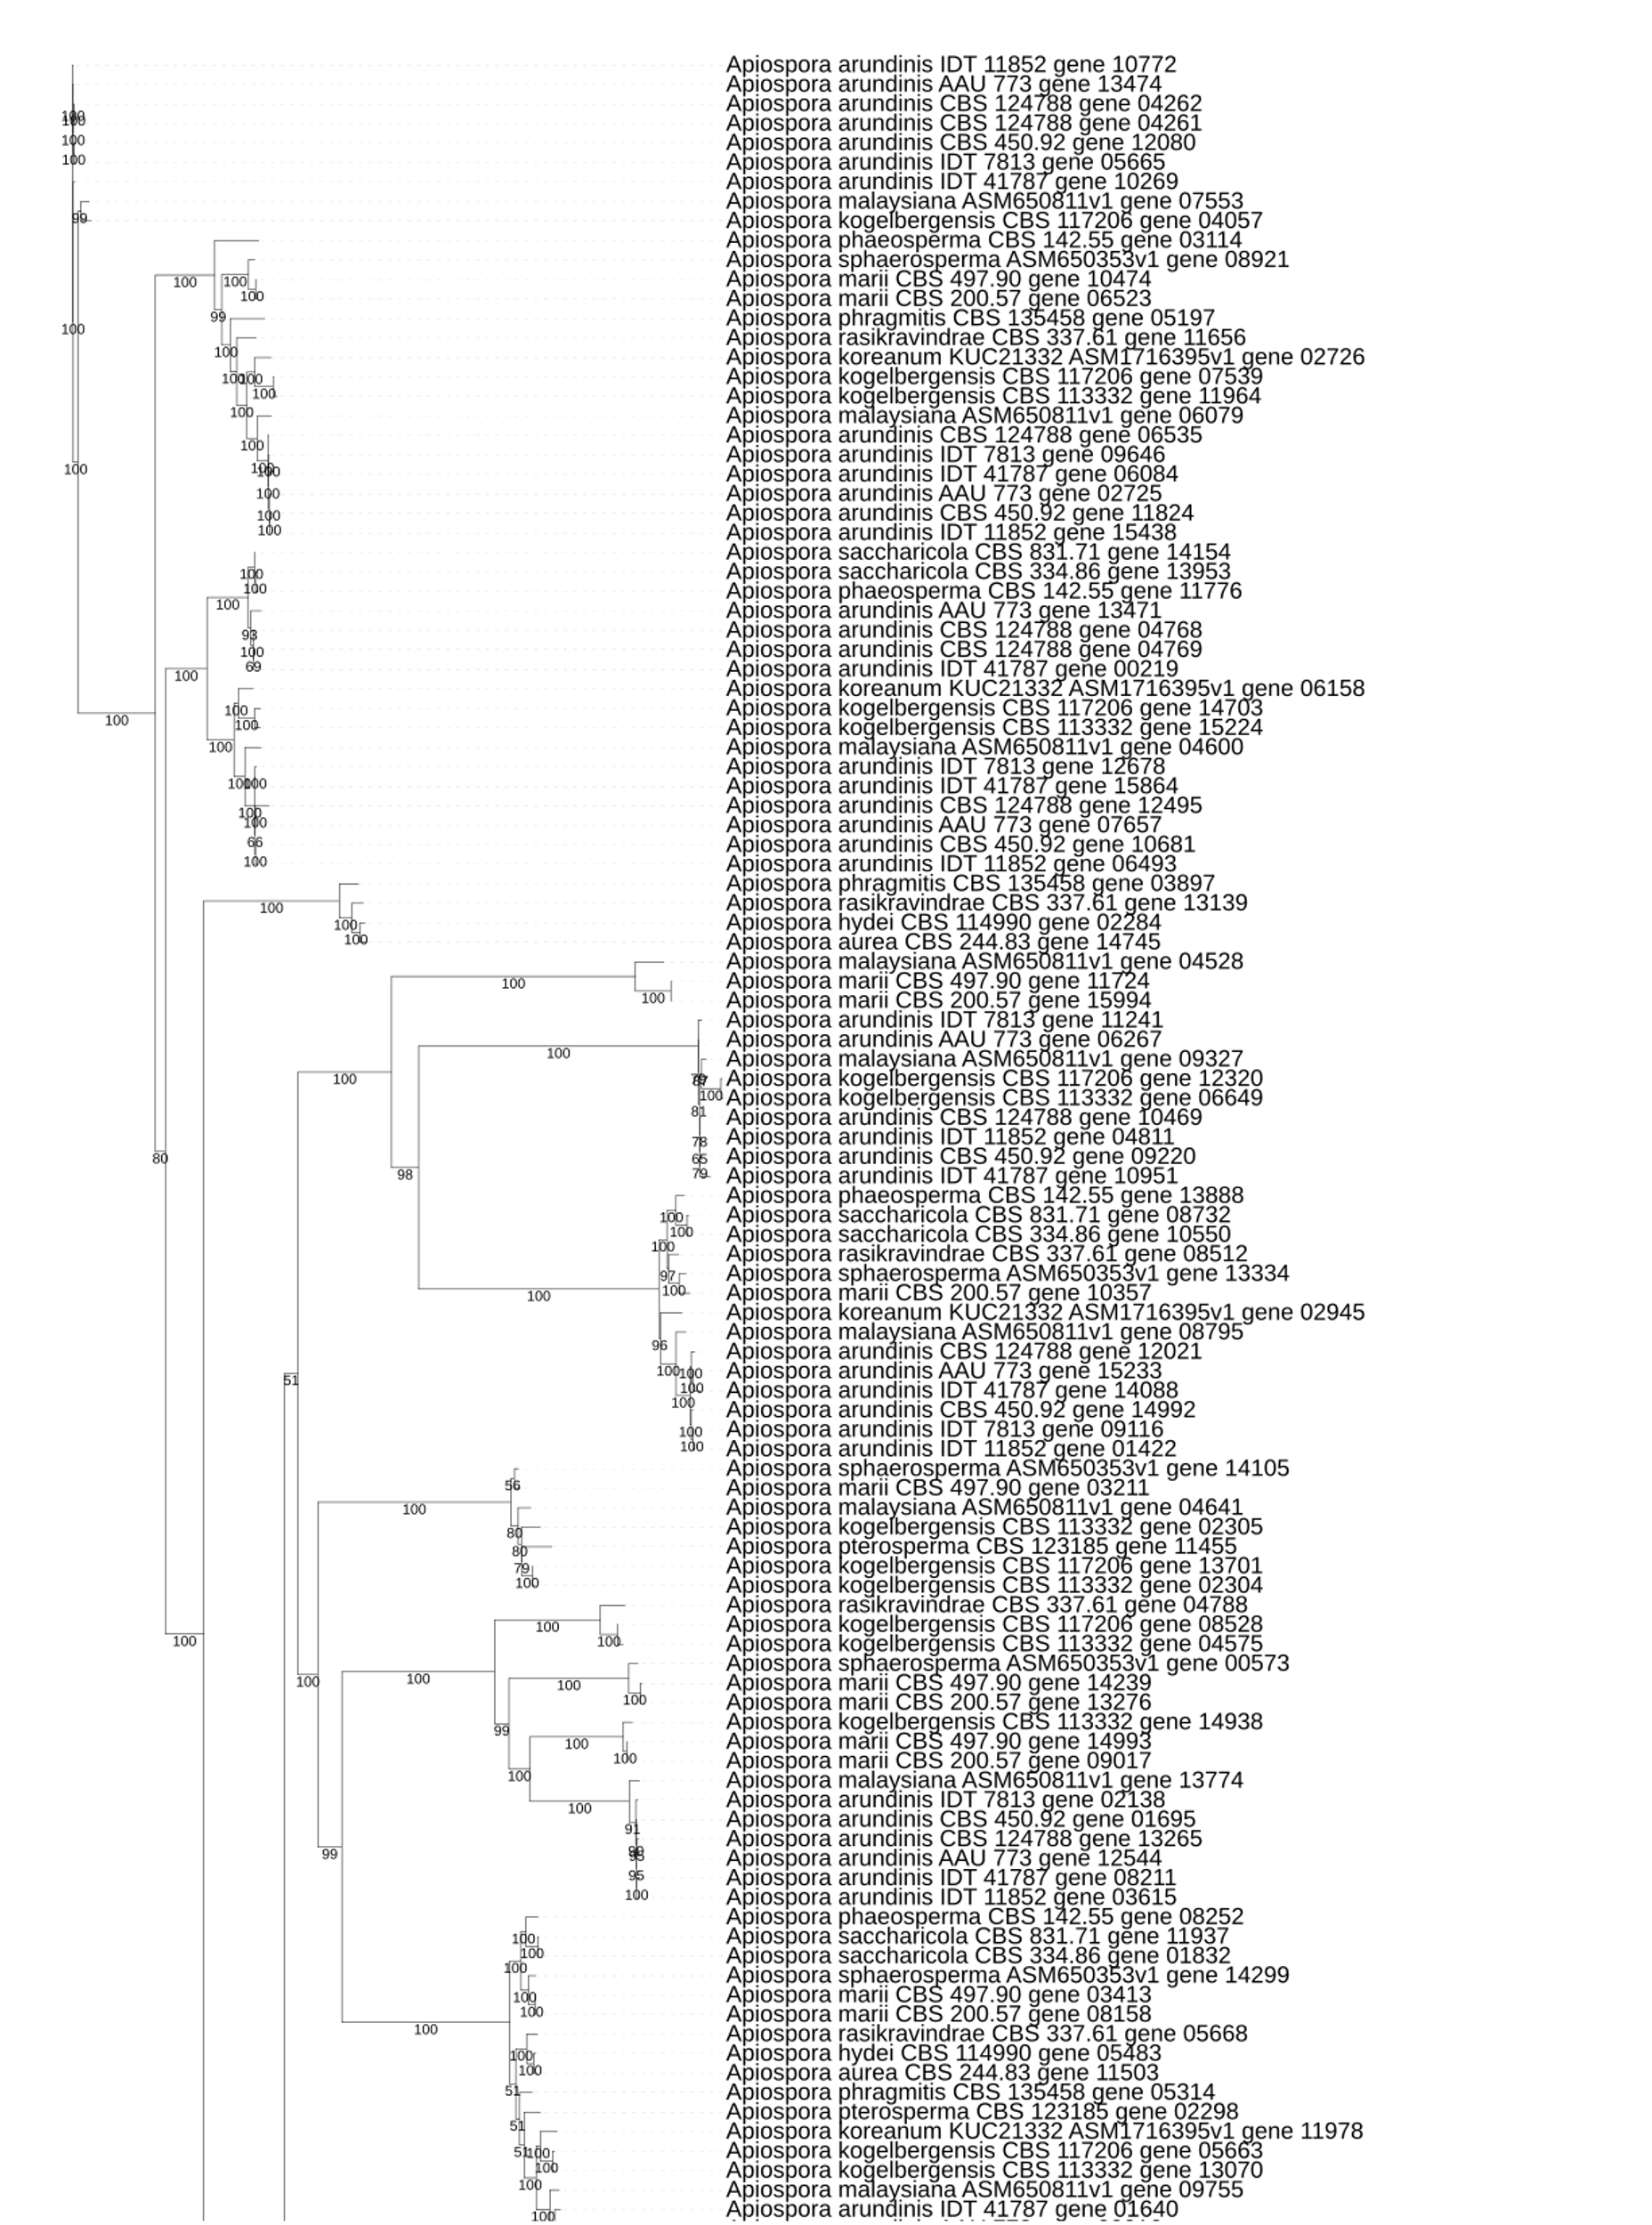


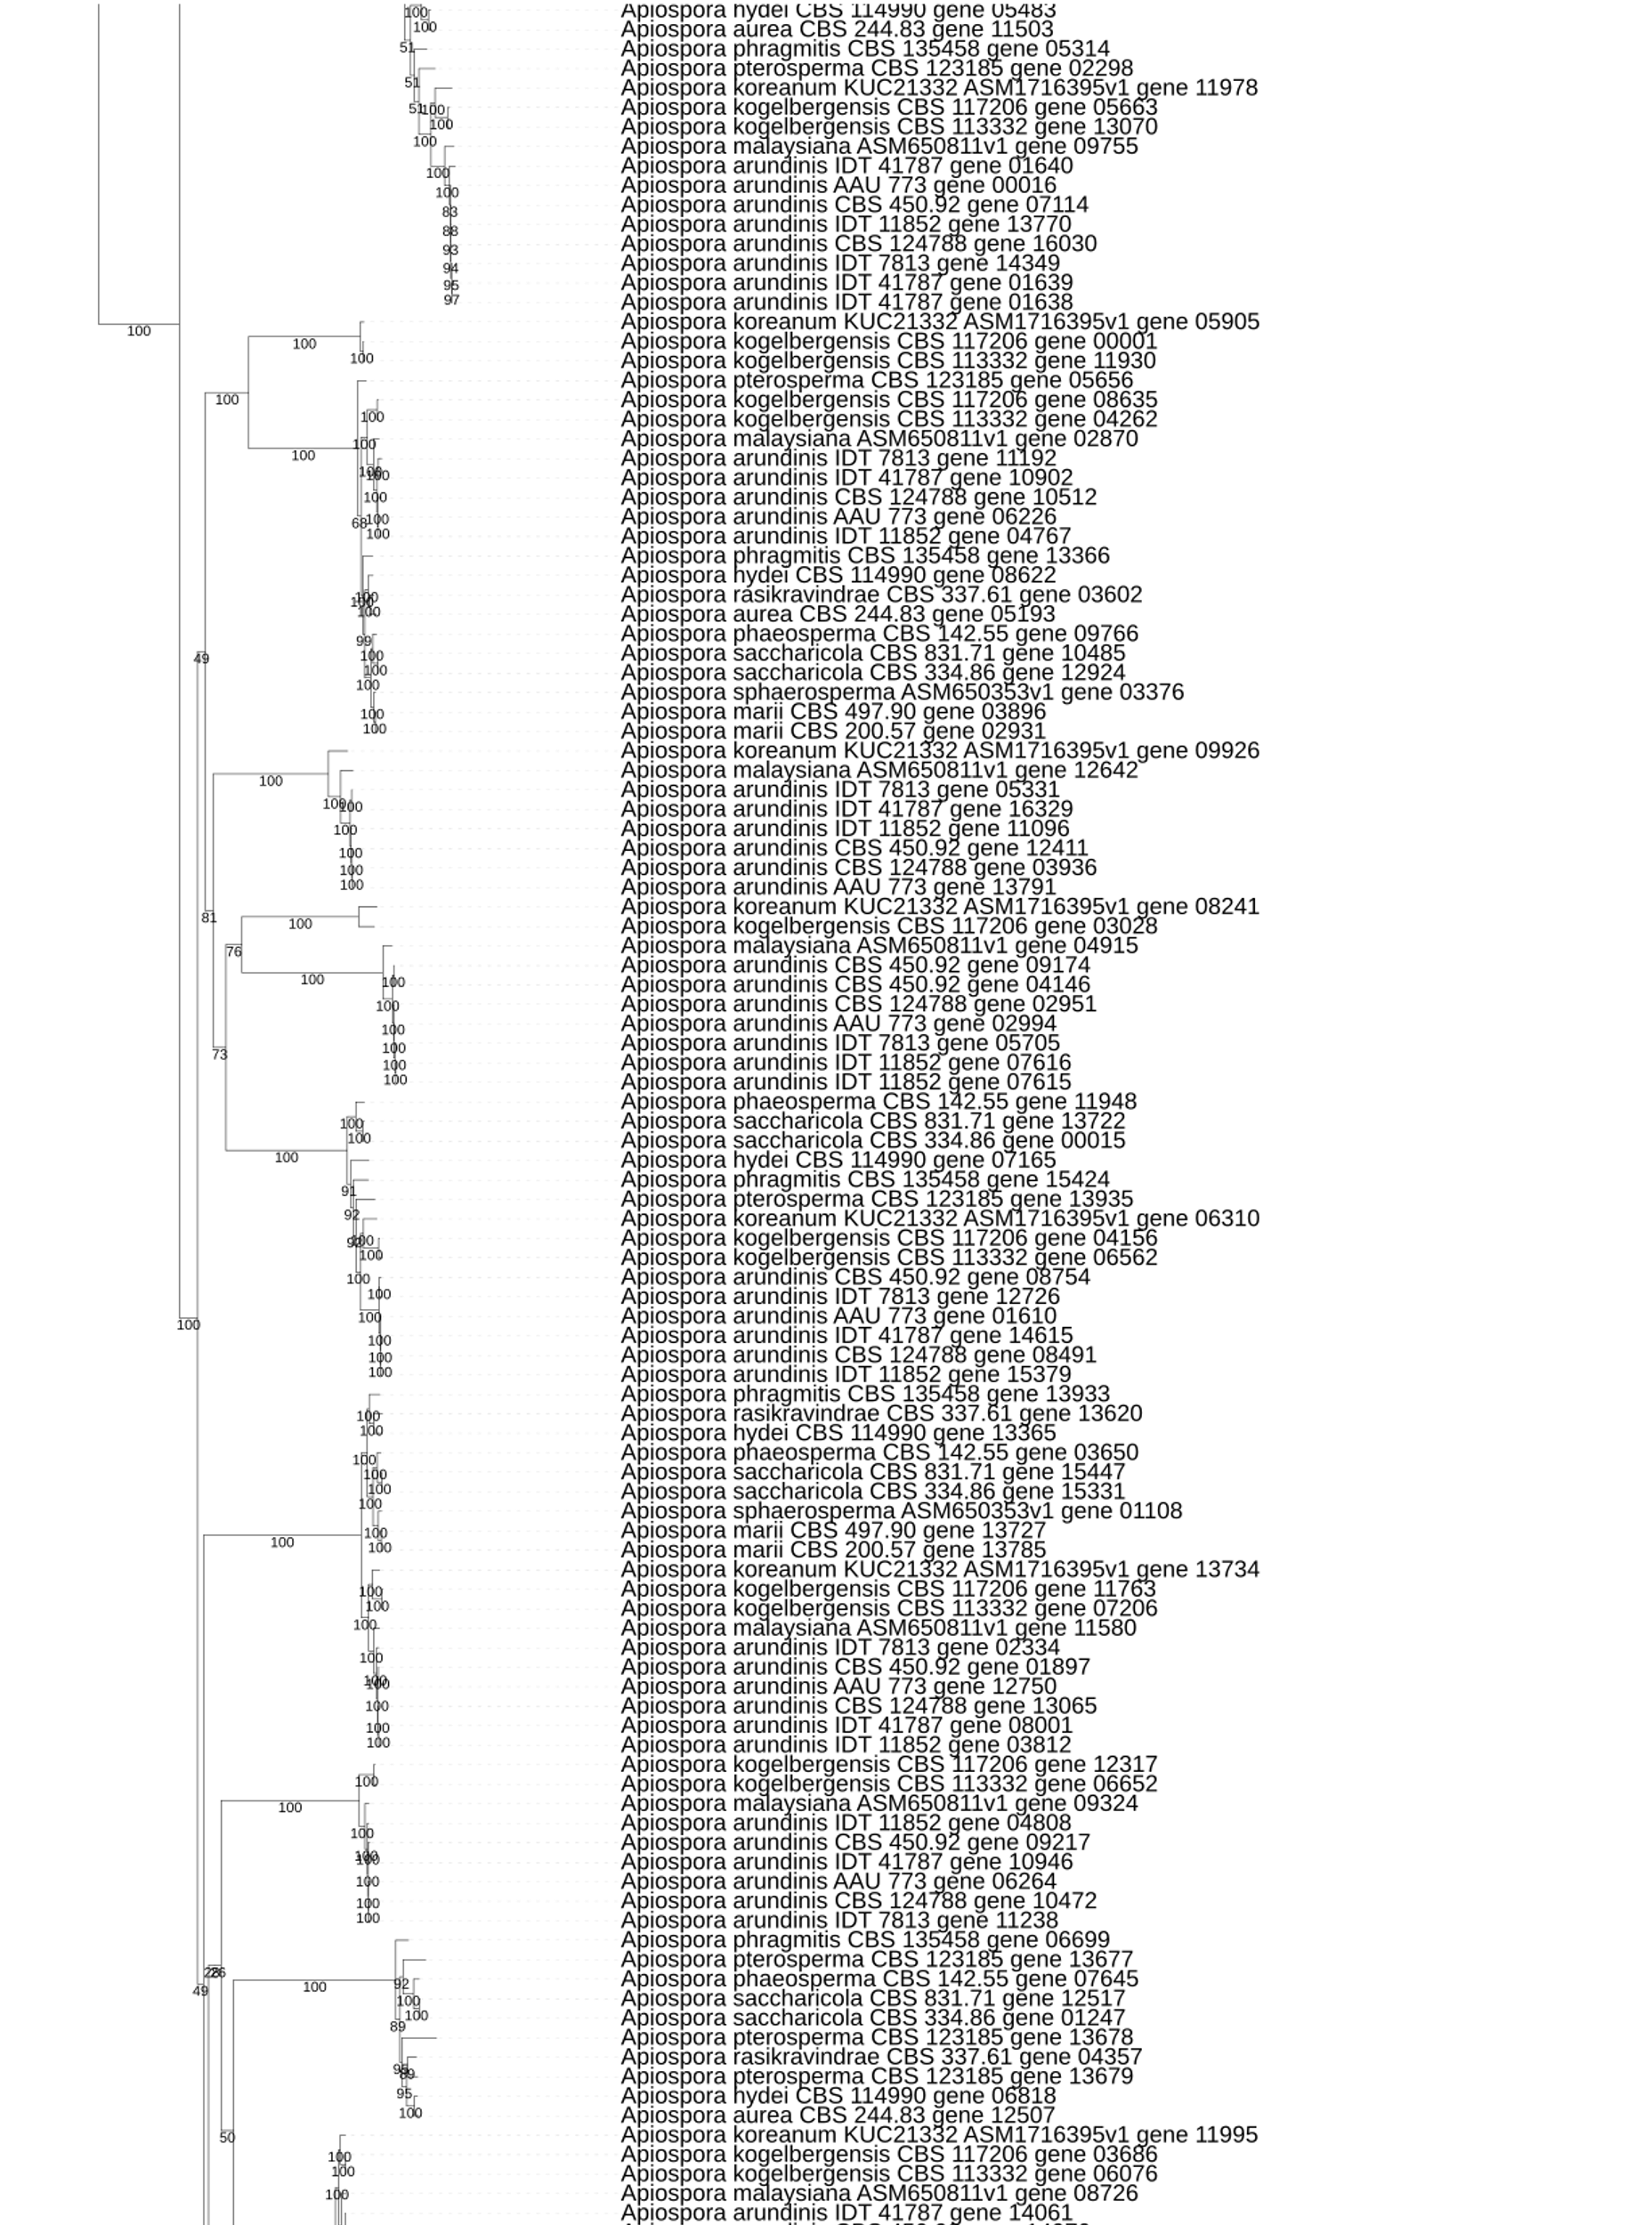


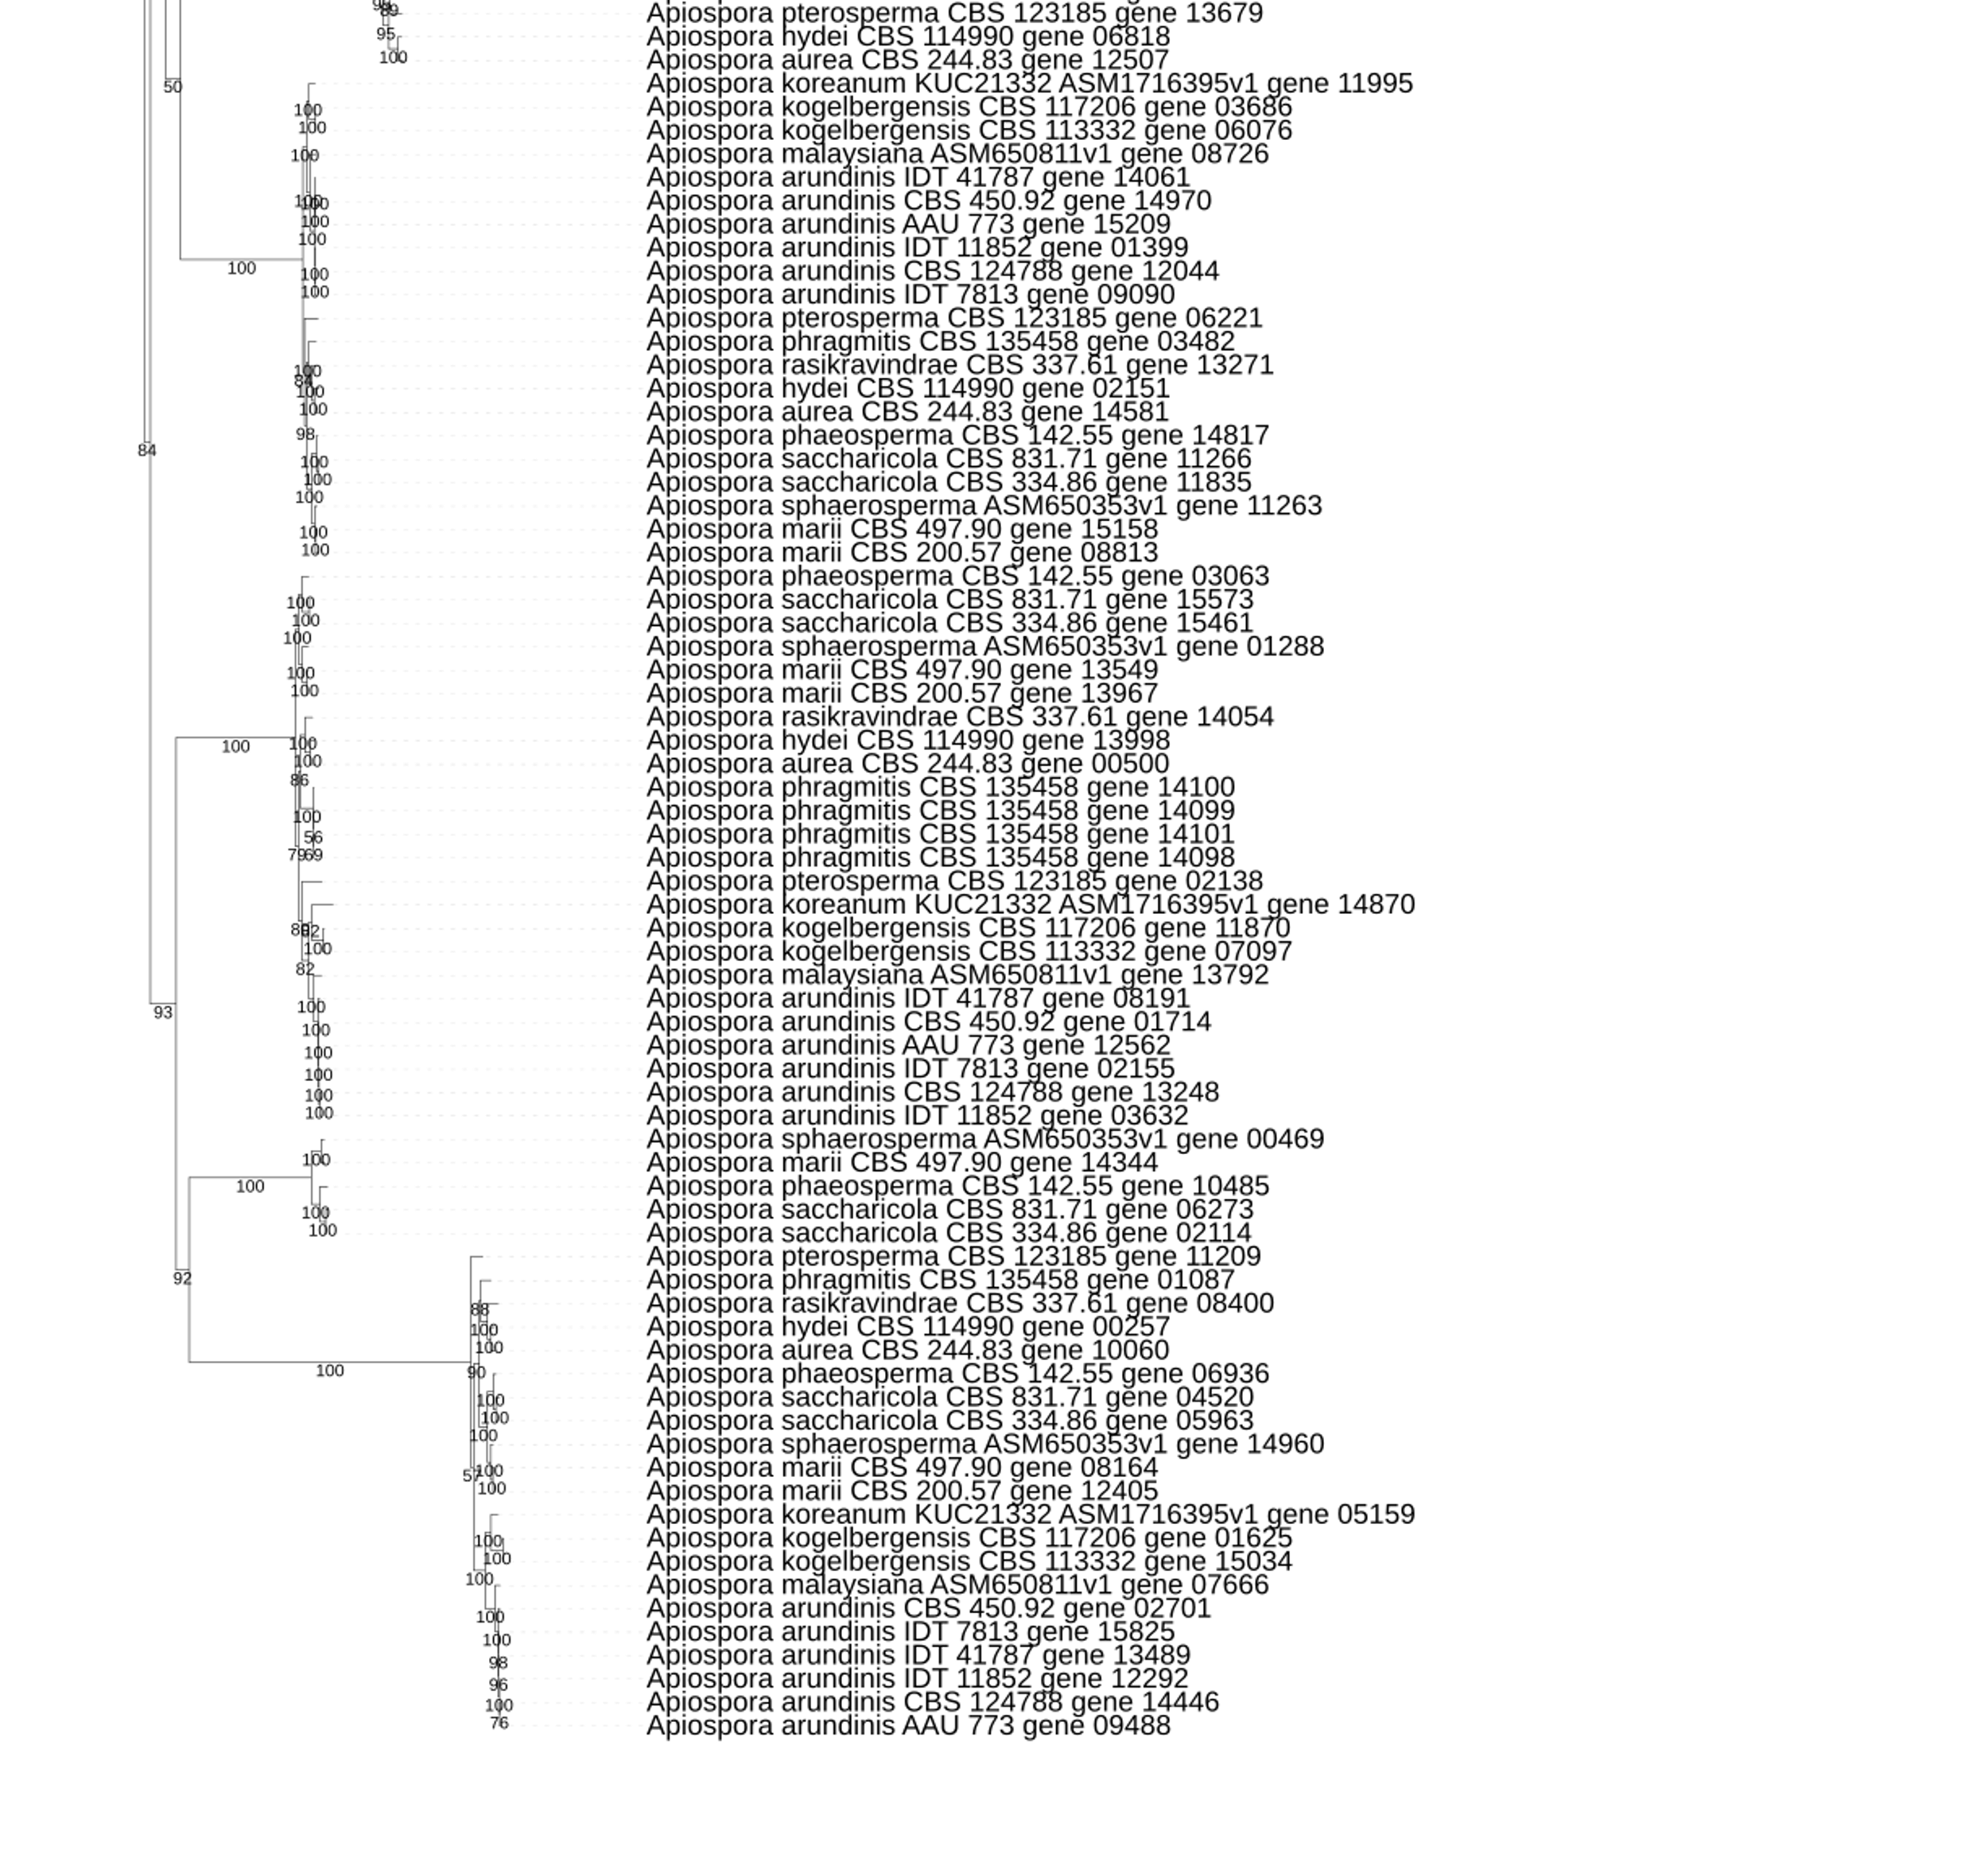


Figure S10 – Phylogenetic analysis of the NRPS core genes located in the 21 Apiospora genome assemblies.


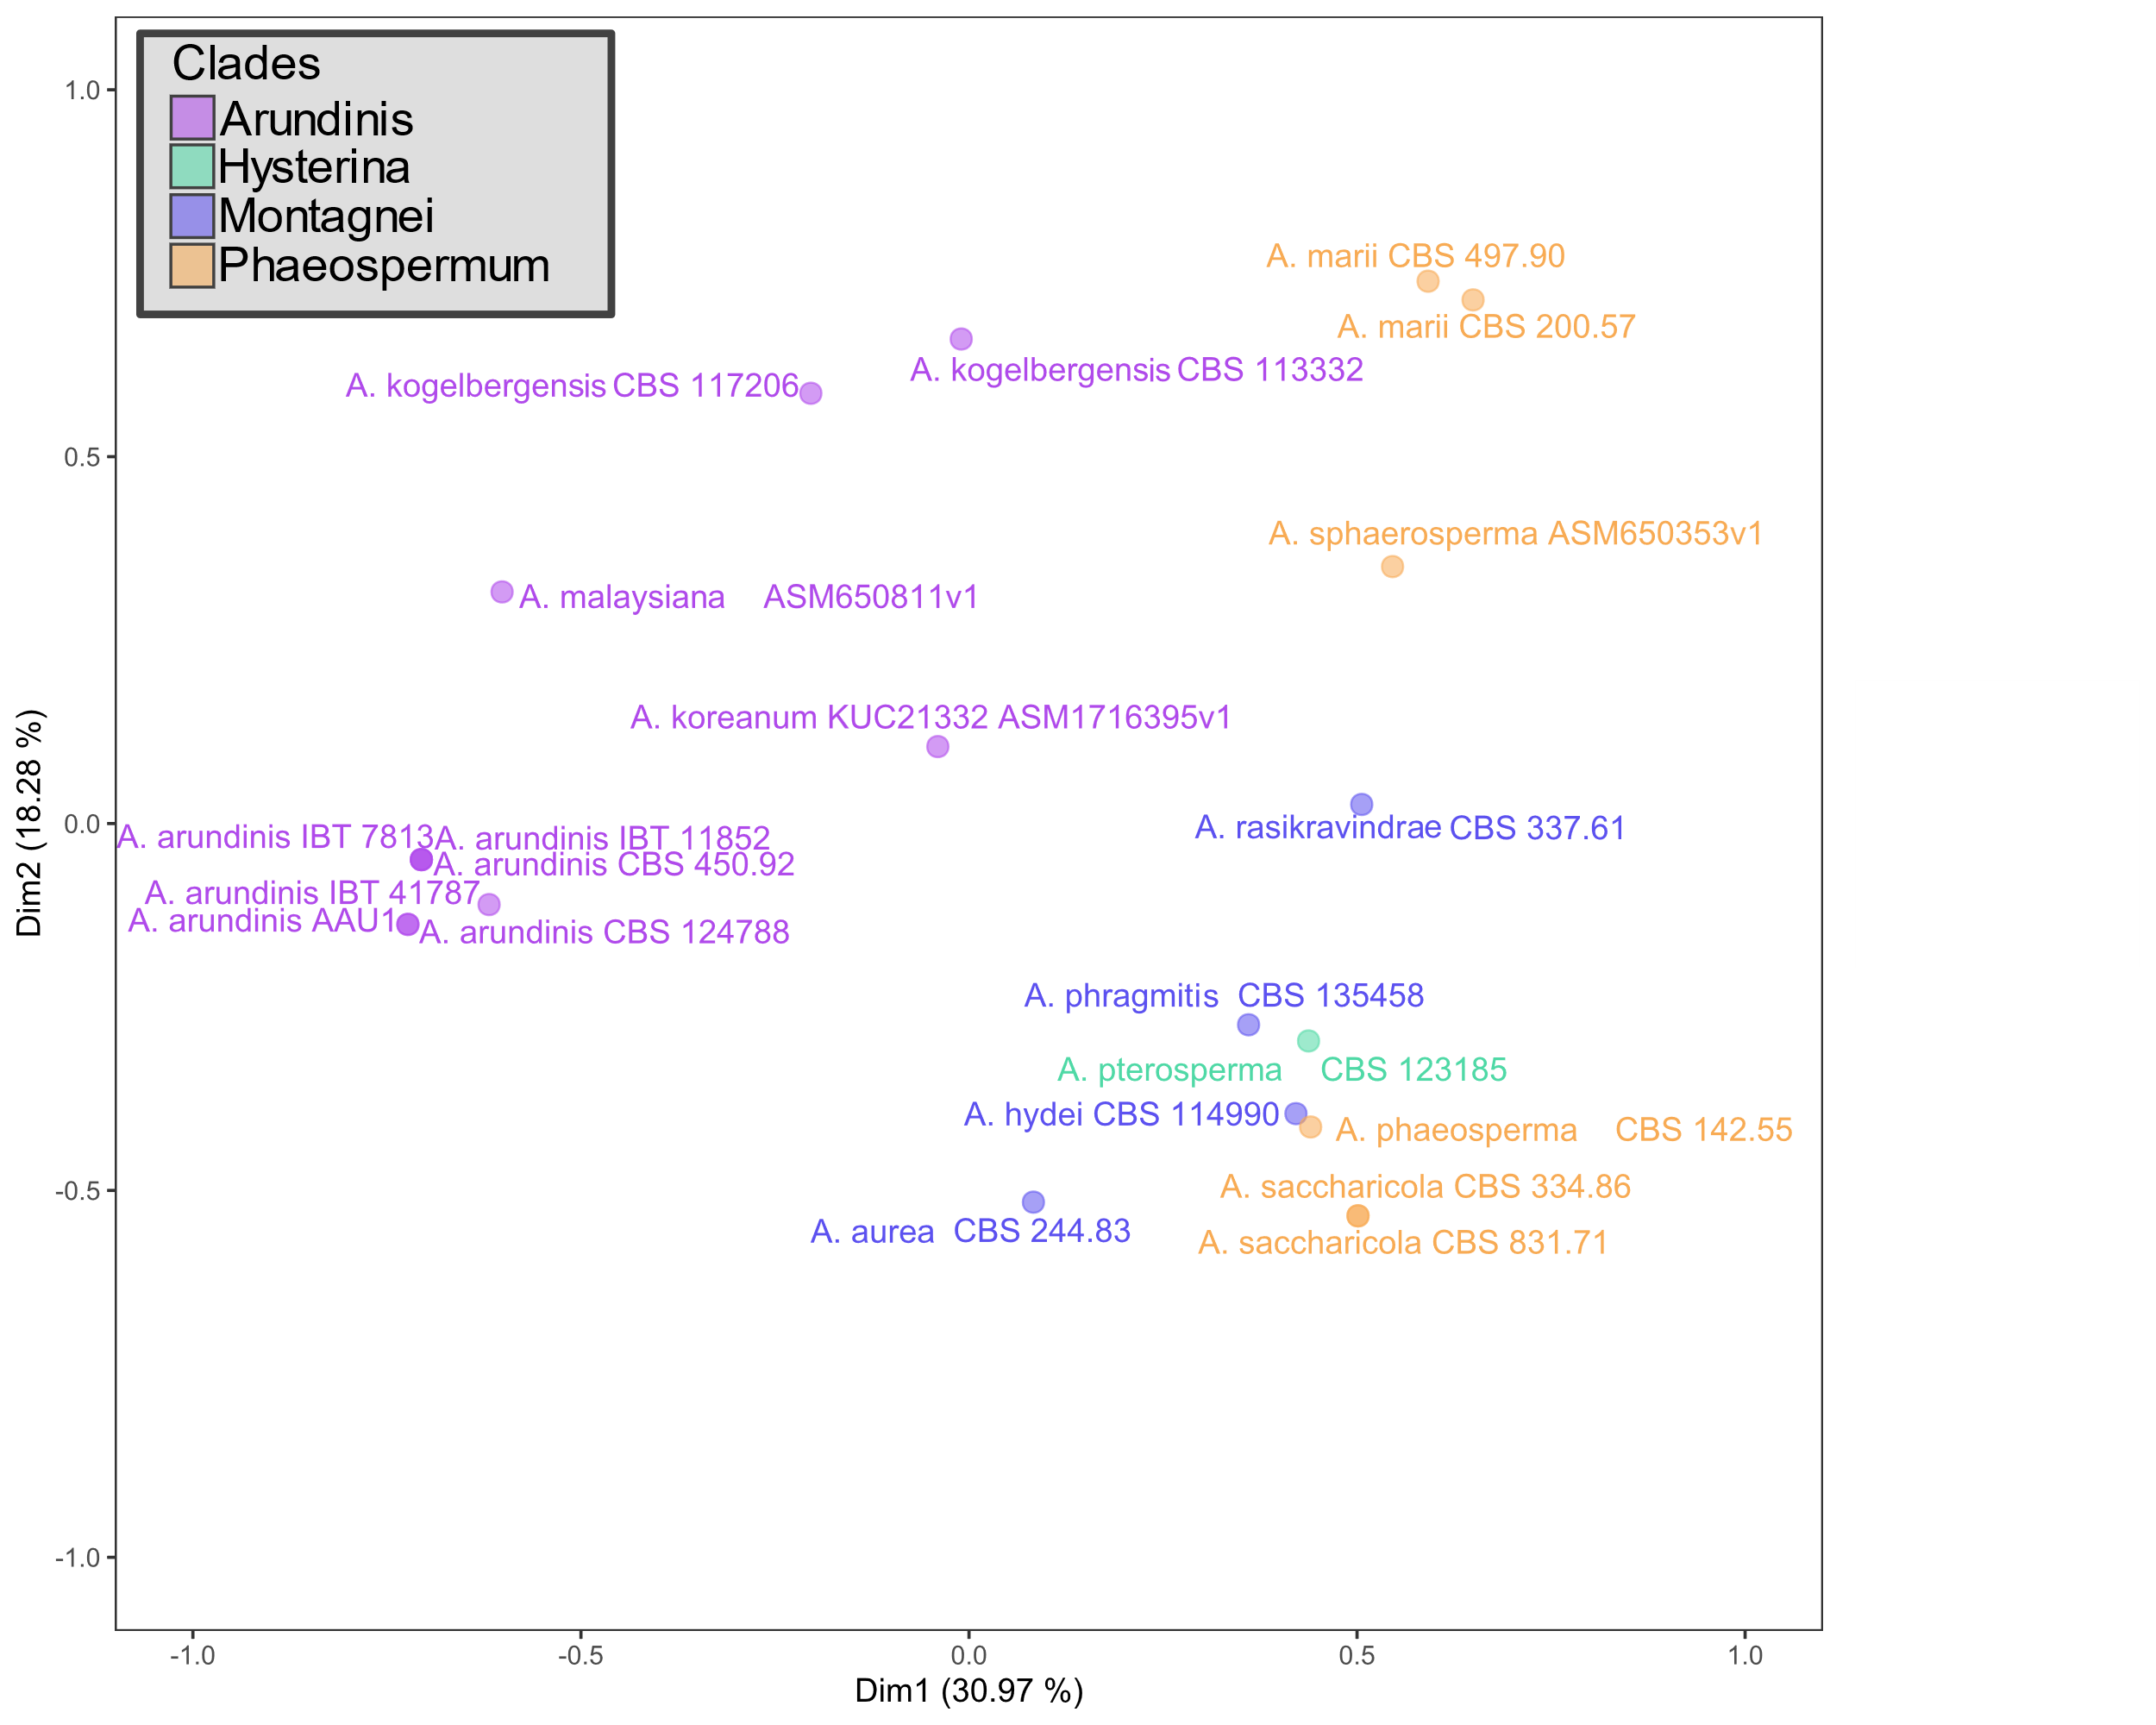


Figure S11 – MCA analysis of the NRPS profiles from all the Apiospora genomes.


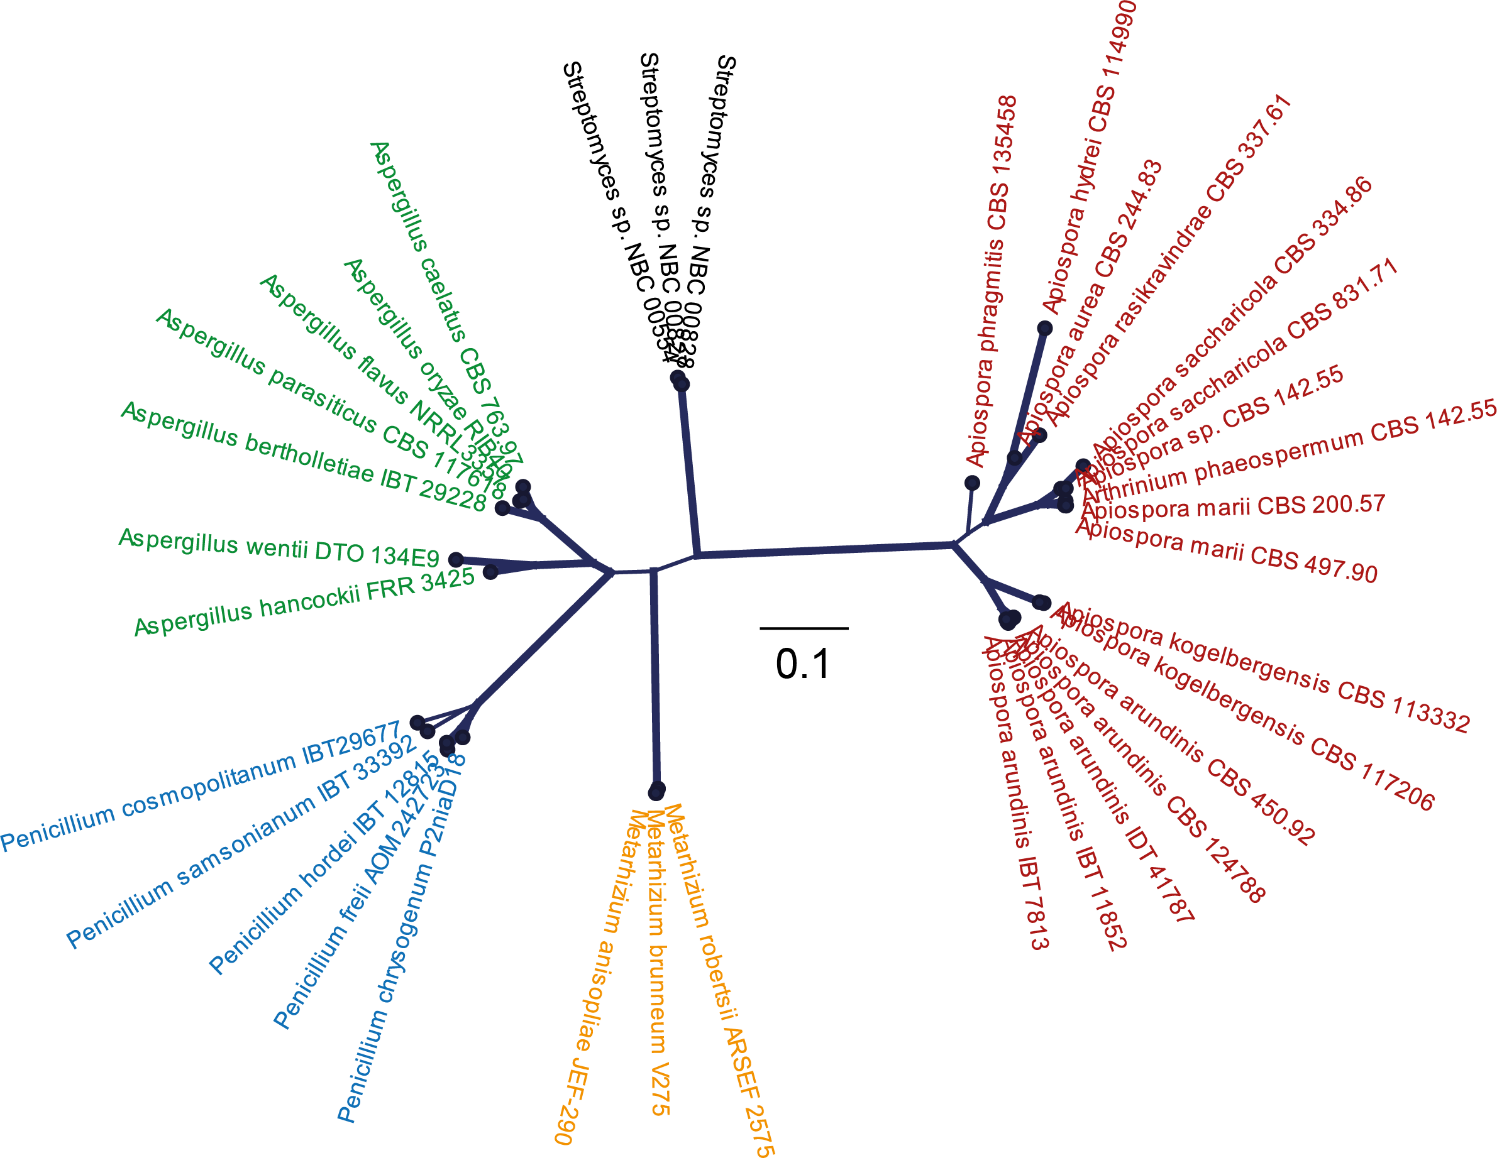


Figure S12 – Radial tree showing the phylogenetic relationship between 3-NPA oxidoreductase protein sequences from available genome sequenced Apiospora strains and selected strains of Aspergillus, Metarhizium, Penicillium and Streptomyces. Bold lines represents bootstrap values of >80% from 100 replications. Note that Apiospora arundinis AAU 773, Apiospora KUC21332, Apiospora malaysiana and Apiospora pterosperma did not contain the gene..
