# Supplementary material for: Analysis of 21 Apiospora genomes reveals a genus with tremendous synthesis potential for carbohydrate-active enzymes and secondary metabolites
Source: Research Square preprint supplement (doi:10.21203/rs.3.rs-7297991/v1), 2025-08-20
Supplement: Supplementary file 2 [file e45cb4d639b5f28a370a7e35.xlsx]

## Sheet: Table S1
Strain	Flow cell	Min Quality	Min Length (kbp)	For assembly (Gb)	SRA accession number	Genome accession number
Apiospora arundinis IBT 11852	R10	80	10	3.7	SRR23060914	JAQQWG000000000
Apiospora arundinis IBT 41787	R10	80	10	1.26	SRR23064193	JAQSVF000000000
Apiospora arundinis IBT 7813	R10	80	10	2.15	SRR23061088	JAQQWJ000000000
Apiospora arundinis CBS 124788	R 9.41	80	8	1.65	SRR23072855	JAQSVG000000000
Apiospora arundinis CBS 450.92	R 9.41	90	10	1.66	SRR23068278	JAQQWH000000000
Apiospora aurea CBS 244.83	R 9.41	90	10	1.56	SRR23062243	JAQQWE000000000
Apiospora hydei CBS 114990	R 9.41	80	8	1.12	SRR23072616	JAQQWN000000000
Apiospora kogelbergensis CBS 113332	R 9.41	80	8	1.33	SRR23072615	JAQQWO000000000
Apiospora kogelbergensis CBS 117206	R 9.41	90	10	1.99	SRR23072856	JAQQWP000000000
Apiospora marii CBS 200.57	R10	80	10	3.4	SRR23061969	JAQQWI000000000
Apiospora marii CBS 497.90	R 10	80	10	2.14	SRR23065628	JAQQWD000000000
Apiospora phaeosperma CBS 142.55	R 9.41	90	10	4.9	SRR23101671	JAQQWQ000000000
Apiospora phragmitis CBS 135458	R10	80	10	1.08	SRR23072973	JAQQWL000000000
Apiospora rasikravindrae CBS 337.61	R 9.41	90	10	1.63	SRR23064192	JAQQWK000000000
Apiospora saccharicola CBS 334.86	R 9.41	90	10	1.79	SRR23062611	JAQQWF000000000
Apiospora saccharicola CBS 831.71	R 9.41	90	10	3.66	SRR23072854	JAQQWM000000000

## Sheet: Table S2
Tags	GO ID	GO Name	GO Category	FDR	P-Value	Nr Test	Nr Reference	Non Annot Test	Non Annot Reference
[OVER]	GO:0006807	nitrogen compound metabolic process	BIOLOGICAL_PROCESS	0	0	1709	537	8307	18690
[OVER]	GO:0071704	organic substance metabolic process	BIOLOGICAL_PROCESS	0	0	2197	820	7819	18407
[OVER]	GO:0008152	metabolic process	BIOLOGICAL_PROCESS	0	0	2436	978	7580	18249
[OVER]	GO:0043170	macromolecule metabolic process	BIOLOGICAL_PROCESS	0	0	1400	418	8616	18809
[OVER]	GO:0009987	cellular process	BIOLOGICAL_PROCESS	0	0	2919	1017	7097	18210
[OVER]	GO:0044238	primary metabolic process	BIOLOGICAL_PROCESS	0	0	2011	680	8005	18547
[OVER]	GO:0044237	cellular metabolic process	BIOLOGICAL_PROCESS	0	0	1902	666	8114	18561
[OVER]	GO:0034641	cellular nitrogen compound metabolic process	BIOLOGICAL_PROCESS	4.16495e-261	1.1589e-263	1130	329	8886	18898
[OVER]	GO:1901564	organonitrogen compound metabolic process	BIOLOGICAL_PROCESS	4.35799e-258	1.27998e-260	1079	295	8937	18932
[OVER]	GO:0006725	cellular aromatic compound metabolic process	BIOLOGICAL_PROCESS	1.14399e-209	4.24421e-212	970	310	9046	18917
[OVER]	GO:1901360	organic cyclic compound metabolic process	BIOLOGICAL_PROCESS	1.16141e-209	4.48838e-212	1030	361	8986	18866
[OVER]	GO:0046483	heterocycle metabolic process	BIOLOGICAL_PROCESS	1.74157e-201	6.99967e-204	969	328	9047	18899
[OVER]	GO:0006139	nucleobase-containing compound metabolic process	BIOLOGICAL_PROCESS	4.71645e-189	2.04144e-191	886	287	9130	18940
[OVER]	GO:1901576	organic substance biosynthetic process	BIOLOGICAL_PROCESS	1.89717e-186	8.50486e-189	968	364	9048	18863
[OVER]	GO:0044249	cellular biosynthetic process	BIOLOGICAL_PROCESS	8.32135e-182	3.85903e-184	934	345	9082	18882
[OVER]	GO:0009058	biosynthetic process	BIOLOGICAL_PROCESS	1.05962e-179	5.0778e-182	1032	441	8984	18786
[OVER]	GO:0044260	cellular macromolecule metabolic process	BIOLOGICAL_PROCESS	7.00669e-177	3.46598e-179	639	125	9377	19102
[OVER]	GO:0010467	gene expression	BIOLOGICAL_PROCESS	7.2413e-177	3.69397e-179	748	203	9268	19024
[OVER]	GO:0019538	protein metabolic process	BIOLOGICAL_PROCESS	3.80387e-175	1.99925e-177	684	159	9332	19068
[OVER]	GO:0051179	localization	BIOLOGICAL_PROCESS	1.84422e-161	9.97801e-164	849	322	9167	18905
[OVER]	GO:0071840	cellular component organization or biogenesis	BIOLOGICAL_PROCESS	3.08408e-154	1.76397e-156	554	106	9462	19121
[OVER]	GO:0051234	establishment of localization	BIOLOGICAL_PROCESS	6.42336e-154	3.77319e-156	814	310	9202	18917
[OVER]	GO:0090304	nucleic acid metabolic process	BIOLOGICAL_PROCESS	1.81348e-152	1.09331e-154	720	233	9296	18994
[OVER]	GO:0006810	transport	BIOLOGICAL_PROCESS	1.53013e-150	9.46129e-153	803	309	9213	18918
[OVER]	GO:1901566	organonitrogen compound biosynthetic process	BIOLOGICAL_PROCESS	3.12199e-150	1.97869e-152	553	112	9463	19115
[OVER]	GO:0044271	cellular nitrogen compound biosynthetic process	BIOLOGICAL_PROCESS	1.78469e-149	1.15871e-151	657	189	9359	19038
[OVER]	GO:0016070	RNA metabolic process	BIOLOGICAL_PROCESS	9.36125e-125	7.09076e-127	581	182	9435	19045
[OVER]	GO:0009059	macromolecule biosynthetic process	BIOLOGICAL_PROCESS	3.33446e-121	2.68035e-123	555	169	9461	19058
[OVER]	GO:0016043	cellular component organization	BIOLOGICAL_PROCESS	7.53423e-120	6.2892e-122	439	87	9577	19140
[OVER]	GO:0065007	biological regulation	BIOLOGICAL_PROCESS	3.20299e-108	2.87175e-110	539	186	9477	19041
[OVER]	GO:0044281	small molecule metabolic process	BIOLOGICAL_PROCESS	1.43303e-92	1.41775e-94	506	197	9510	19030
[OVER]	GO:0050789	regulation of biological process	BIOLOGICAL_PROCESS	3.45019e-89	3.57339e-91	472	176	9544	19051
[OVER]	GO:0034645	cellular macromolecule biosynthetic process	BIOLOGICAL_PROCESS	3.99754e-89	4.20208e-91	301	48	9715	19179
[OVER]	GO:0043412	macromolecule modification	BIOLOGICAL_PROCESS	1.79525e-87	1.94262e-89	357	88	9659	19139
[OVER]	GO:0009056	catabolic process	BIOLOGICAL_PROCESS	1.81654e-87	1.99373e-89	411	129	9605	19098
[OVER]	GO:0044085	cellular component biogenesis	BIOLOGICAL_PROCESS	5.44452e-87	6.05975e-89	299	50	9717	19177
[OVER]	GO:0043603	amide metabolic process	BIOLOGICAL_PROCESS	1.78546e-84	2.01481e-86	296	52	9720	19175
[OVER]	GO:1901362	organic cyclic compound biosynthetic process	BIOLOGICAL_PROCESS	5.1167e-82	6.01127e-84	472	195	9544	19032
[OVER]	GO:0051641	cellular localization	BIOLOGICAL_PROCESS	4.03957e-81	4.80827e-83	303	62	9713	19165
[OVER]	GO:0043604	amide biosynthetic process	BIOLOGICAL_PROCESS	6.21946e-81	7.49911e-83	264	38	9752	19189
[OVER]	GO:0050896	response to stimulus	BIOLOGICAL_PROCESS	3.05007e-80	3.72478e-82	339	89	9677	19138
[OVER]	GO:0019438	aromatic compound biosynthetic process	BIOLOGICAL_PROCESS	1.36957e-79	1.6937e-81	426	161	9590	19066
[OVER]	GO:0050794	regulation of cellular process	BIOLOGICAL_PROCESS	7.40848e-79	9.27634e-81	434	170	9582	19057
[OVER]	GO:0006793	phosphorus metabolic process	BIOLOGICAL_PROCESS	1.03129e-77	1.30724e-79	403	146	9613	19081
[OVER]	GO:0018130	heterocycle biosynthetic process	BIOLOGICAL_PROCESS	1.10969e-77	1.42378e-79	437	176	9579	19051
[OVER]	GO:1901575	organic substance catabolic process	BIOLOGICAL_PROCESS	3.84414e-77	4.99162e-79	369	119	9647	19108
[OVER]	GO:0006518	peptide metabolic process	BIOLOGICAL_PROCESS	4.83331e-77	6.64964e-79	251	36	9765	19191
[OVER]	GO:0006796	phosphate-containing compound metabolic process	BIOLOGICAL_PROCESS	7.1134e-76	9.89652e-78	393	142	9623	19085
[OVER]	GO:0044248	cellular catabolic process	BIOLOGICAL_PROCESS	1.67508e-75	2.35635e-77	300	70	9716	19157
[OVER]	GO:0036211	protein modification process	BIOLOGICAL_PROCESS	2.80621e-74	3.9909e-76	301	73	9715	19154
[OVER]	GO:0043043	peptide biosynthetic process	BIOLOGICAL_PROCESS	4.06587e-73	5.8452e-75	238	34	9778	19193
[OVER]	GO:0051716	cellular response to stimulus	BIOLOGICAL_PROCESS	1.55142e-72	2.25435e-74	310	83	9706	19144
[OVER]	GO:0006412	translation	BIOLOGICAL_PROCESS	1.66281e-72	2.44191e-74	233	32	9783	19195
[OVER]	GO:0006996	organelle organization	BIOLOGICAL_PROCESS	5.24485e-72	7.78337e-74	269	55	9747	19172
[OVER]	GO:0055085	transmembrane transport	BIOLOGICAL_PROCESS	3.18431e-71	4.77475e-73	449	206	9567	19021
[OVER]	GO:0033036	macromolecule localization	BIOLOGICAL_PROCESS	2.61624e-70	4.00384e-72	272	60	9744	19167
[OVER]	GO:0006396	RNA processing	BIOLOGICAL_PROCESS	2.90472e-70	4.49022e-72	263	54	9753	19173
[OVER]	GO:0071702	organic substance transport	BIOLOGICAL_PROCESS	1.11332e-67	1.73821e-69	315	97	9701	19130
[OVER]	GO:0034654	nucleobase-containing compound biosynthetic process	BIOLOGICAL_PROCESS	4.4862e-65	7.07362e-67	365	146	9651	19081
[OVER]	GO:0071705	nitrogen compound transport	BIOLOGICAL_PROCESS	2.1535e-61	3.4954e-63	265	72	9751	19155
[OVER]	GO:0051649	establishment of localization in cell	BIOLOGICAL_PROCESS	7.90107e-60	1.31908e-61	215	40	9801	19187
[OVER]	GO:0070727	cellular macromolecule localization	BIOLOGICAL_PROCESS	9.27311e-60	1.56248e-61	227	48	9789	19179
[OVER]	GO:0006082	organic acid metabolic process	BIOLOGICAL_PROCESS	1.79536e-59	3.05287e-61	319	120	9697	19107
[OVER]	GO:0008104	protein localization	BIOLOGICAL_PROCESS	2.2254e-59	3.8185e-61	226	48	9790	19179
[OVER]	GO:0043436	oxoacid metabolic process	BIOLOGICAL_PROCESS	2.3009e-59	3.98362e-61	315	117	9701	19110
[OVER]	GO:0019752	carboxylic acid metabolic process	BIOLOGICAL_PROCESS	8.33499e-58	1.45595e-59	309	116	9707	19111
[OVER]	GO:0019222	regulation of metabolic process	BIOLOGICAL_PROCESS	2.26244e-57	3.987e-59	318	125	9698	19102
[OVER]	GO:0046907	intracellular transport	BIOLOGICAL_PROCESS	6.61149e-57	1.17533e-58	206	39	9810	19188
[OVER]	GO:0060255	regulation of macromolecule metabolic process	BIOLOGICAL_PROCESS	6.77331e-55	1.23551e-56	307	122	9709	19105
[OVER]	GO:0009057	macromolecule catabolic process	BIOLOGICAL_PROCESS	2.57938e-53	4.78475e-55	234	65	9782	19162
[OVER]	GO:0045184	establishment of protein localization	BIOLOGICAL_PROCESS	5.53881e-53	1.04457e-54	199	41	9817	19186
[OVER]	GO:0015031	protein transport	BIOLOGICAL_PROCESS	5.12147e-52	9.81701e-54	195	40	9821	19187
[OVER]	GO:0034660	ncRNA metabolic process	BIOLOGICAL_PROCESS	1.69662e-51	3.35704e-53	201	45	9815	19182
[OVER]	GO:0022607	cellular component assembly	BIOLOGICAL_PROCESS	1.09515e-50	2.18387e-52	176	30	9840	19197
[OVER]	GO:0019637	organophosphate metabolic process	BIOLOGICAL_PROCESS	7.25994e-50	1.45895e-51	233	72	9783	19155
[OVER]	GO:0080090	regulation of primary metabolic process	BIOLOGICAL_PROCESS	1.9918e-48	4.03348e-50	287	122	9729	19105
[OVER]	GO:0022613	ribonucleoprotein complex biogenesis	BIOLOGICAL_PROCESS	3.06141e-48	6.24682e-50	165	27	9851	19200
[OVER]	GO:0006950	response to stress	BIOLOGICAL_PROCESS	6.48857e-48	1.34405e-49	204	54	9812	19173
[OVER]	GO:0006520	amino acid metabolic process	BIOLOGICAL_PROCESS	1.13973e-47	2.39608e-49	206	56	9810	19171
[OVER]	GO:0051171	regulation of nitrogen compound metabolic process	BIOLOGICAL_PROCESS	4.93141e-47	1.05199e-48	283	122	9733	19105
[OVER]	GO:0006811	ion transport	BIOLOGICAL_PROCESS	6.61068e-47	1.42044e-48	186	43	9830	19184
[OVER]	GO:0005975	carbohydrate metabolic process	BIOLOGICAL_PROCESS	1.4503e-46	3.13869e-48	282	123	9734	19104
[OVER]	GO:0033554	cellular response to stress	BIOLOGICAL_PROCESS	2.55506e-45	5.60858e-47	186	46	9830	19181
[OVER]	GO:0031323	regulation of cellular metabolic process	BIOLOGICAL_PROCESS	7.41568e-45	1.65073e-46	276	122	9740	19105
[OVER]	GO:0044265	cellular macromolecule catabolic process	BIOLOGICAL_PROCESS	1.25054e-44	2.82237e-46	151	24	9865	19203
[OVER]	GO:0010468	regulation of gene expression	BIOLOGICAL_PROCESS	2.10811e-44	4.823e-46	271	119	9745	19108
[OVER]	GO:1901135	carbohydrate derivative metabolic process	BIOLOGICAL_PROCESS	6.79675e-44	1.56549e-45	217	73	9799	19154
[OVER]	GO:0043933	protein-containing complex organization	BIOLOGICAL_PROCESS	7.86872e-44	1.82456e-45	149	24	9867	19203
[OVER]	GO:0007049	cell cycle	BIOLOGICAL_PROCESS	1.71357e-41	4.05282e-43	148	27	9868	19200
[OVER]	GO:0065003	protein-containing complex assembly	BIOLOGICAL_PROCESS	8.89946e-41	2.13235e-42	133	19	9883	19208
[OVER]	GO:0016071	mRNA metabolic process	BIOLOGICAL_PROCESS	2.13941e-39	5.25841e-41	133	21	9883	19206
[OVER]	GO:0016192	vesicle-mediated transport	BIOLOGICAL_PROCESS	2.66436e-39	6.58985e-41	147	30	9869	19197
[OVER]	GO:0034470	ncRNA processing	BIOLOGICAL_PROCESS	1.27289e-38	3.18762e-40	154	36	9862	19191
[OVER]	GO:0032774	RNA biosynthetic process	BIOLOGICAL_PROCESS	5.2833e-38	1.33941e-39	250	119	9766	19108
[OVER]	GO:0006508	proteolysis	BIOLOGICAL_PROCESS	1.5053e-37	3.83946e-39	183	60	9833	19167
[OVER]	GO:0042254	ribosome biogenesis	BIOLOGICAL_PROCESS	6.70909e-37	1.74235e-38	130	23	9886	19204
[OVER]	GO:0097659	nucleic acid-templated transcription	BIOLOGICAL_PROCESS	8.31091e-37	2.17119e-38	244	117	9772	19110
[OVER]	GO:0006351	DNA-templated transcription	BIOLOGICAL_PROCESS	1.53118e-36	4.0238e-38	243	117	9773	19110
[OVER]	GO:0031326	regulation of cellular biosynthetic process	BIOLOGICAL_PROCESS	6.08594e-36	1.60874e-37	240	116	9776	19111
[OVER]	GO:0009889	regulation of biosynthetic process	BIOLOGICAL_PROCESS	7.40597e-36	1.96913e-37	242	118	9774	19109
[OVER]	GO:1901565	organonitrogen compound catabolic process	BIOLOGICAL_PROCESS	8.01109e-36	2.1424e-37	156	43	9860	19184
[OVER]	GO:0090407	organophosphate biosynthetic process	BIOLOGICAL_PROCESS	1.84106e-35	4.952e-37	155	43	9861	19184
[OVER]	GO:1901137	carbohydrate derivative biosynthetic process	BIOLOGICAL_PROCESS	3.40335e-35	9.20676e-37	142	34	9874	19193
[OVER]	GO:0044283	small molecule biosynthetic process	BIOLOGICAL_PROCESS	3.60273e-35	9.80182e-37	197	78	9819	19149
[OVER]	GO:0010556	regulation of macromolecule biosynthetic process	BIOLOGICAL_PROCESS	1.57778e-34	4.31701e-36	234	115	9782	19112
[OVER]	GO:0022402	cell cycle process	BIOLOGICAL_PROCESS	5.56899e-34	1.54096e-35	121	22	9895	19205
[OVER]	GO:0006629	lipid metabolic process	BIOLOGICAL_PROCESS	8.24504e-34	2.29418e-35	226	109	9790	19118
[OVER]	GO:0006259	DNA metabolic process	BIOLOGICAL_PROCESS	8.52252e-34	2.39774e-35	156	47	9860	19180
[OVER]	GO:1901605	alpha-amino acid metabolic process	BIOLOGICAL_PROCESS	1.43507e-33	4.05964e-35	139	35	9877	19192
[OVER]	GO:0006974	cellular response to DNA damage stimulus	BIOLOGICAL_PROCESS	1.53258e-33	4.35918e-35	126	26	9890	19201
[OVER]	GO:0019219	regulation of nucleobase-containing compound metabolic process	BIOLOGICAL_PROCESS	1.79618e-33	5.13671e-35	230	114	9786	19113
[OVER]	GO:0055086	nucleobase-containing small molecule metabolic process	BIOLOGICAL_PROCESS	8.19921e-33	2.38283e-34	159	52	9857	19175
[OVER]	GO:0006812	cation transport	BIOLOGICAL_PROCESS	3.02231e-32	8.83005e-34	127	29	9889	19198
[OVER]	GO:0048519	negative regulation of biological process	BIOLOGICAL_PROCESS	1.8899e-31	5.60922e-33	122	27	9894	19200
[OVER]	GO:0034220	ion transmembrane transport	BIOLOGICAL_PROCESS	2.56649e-30	7.81572e-32	119	27	9897	19200
[OVER]	GO:0006753	nucleoside phosphate metabolic process	BIOLOGICAL_PROCESS	8.68008e-30	2.68359e-31	134	39	9882	19188
[OVER]	GO:0051252	regulation of RNA metabolic process	BIOLOGICAL_PROCESS	1.48025e-29	4.6222e-31	214	112	9802	19115
[OVER]	GO:0009117	nucleotide metabolic process	BIOLOGICAL_PROCESS	1.71012e-29	5.36643e-31	131	37	9885	19190
[OVER]	GO:0000278	mitotic cell cycle	BIOLOGICAL_PROCESS	2.13165e-29	6.72216e-31	91	11	9925	19216
[OVER]	GO:0016053	organic acid biosynthetic process	BIOLOGICAL_PROCESS	6.72765e-29	2.14237e-30	149	53	9867	19174
[OVER]	GO:0007154	cell communication	BIOLOGICAL_PROCESS	7.74453e-29	2.47815e-30	130	38	9886	19189
[OVER]	GO:0046394	carboxylic acid biosynthetic process	BIOLOGICAL_PROCESS	7.88775e-29	2.53618e-30	145	50	9871	19177
[OVER]	GO:0006886	intracellular protein transport	BIOLOGICAL_PROCESS	7.93171e-29	2.56257e-30	115	27	9901	19200
[OVER]	GO:0006397	mRNA processing	BIOLOGICAL_PROCESS	7.69009e-28	2.54395e-29	99	18	9917	19209
[OVER]	GO:0008652	amino acid biosynthetic process	BIOLOGICAL_PROCESS	8.41752e-28	2.7976e-29	102	20	9914	19207
[OVER]	GO:0016310	phosphorylation	BIOLOGICAL_PROCESS	1.2128e-27	4.04953e-29	179	84	9837	19143
[OVER]	GO:0016072	rRNA metabolic process	BIOLOGICAL_PROCESS	1.87783e-27	6.32814e-29	98	18	9918	19209
[OVER]	GO:0006281	DNA repair	BIOLOGICAL_PROCESS	4.98582e-27	1.68789e-28	100	20	9916	19207
[OVER]	GO:1903047	mitotic cell cycle process	BIOLOGICAL_PROCESS	7.49029e-27	2.54733e-28	83	10	9933	19217
[OVER]	GO:0030163	protein catabolic process	BIOLOGICAL_PROCESS	7.56569e-27	2.58466e-28	98	19	9918	19208
[OVER]	GO:0072521	purine-containing compound metabolic process	BIOLOGICAL_PROCESS	2.5116e-26	8.61918e-28	111	29	9905	19198
[OVER]	GO:0048518	positive regulation of biological process	BIOLOGICAL_PROCESS	3.00611e-26	1.03627e-27	130	44	9886	19183
[OVER]	GO:0007165	signal transduction	BIOLOGICAL_PROCESS	1.22552e-25	4.28145e-27	121	38	9895	19189
[OVER]	GO:0023052	signaling	BIOLOGICAL_PROCESS	1.3208e-25	4.63473e-27	122	39	9894	19188
[OVER]	GO:0006399	tRNA metabolic process	BIOLOGICAL_PROCESS	2.30102e-25	8.10995e-27	107	28	9909	19199
[OVER]	GO:0033365	protein localization to organelle	BIOLOGICAL_PROCESS	2.73997e-25	9.69938e-27	81	11	9935	19216
[OVER]	GO:0006790	sulfur compound metabolic process	BIOLOGICAL_PROCESS	4.08296e-25	1.46184e-26	84	13	9932	19214
[OVER]	GO:0098655	cation transmembrane transport	BIOLOGICAL_PROCESS	4.08296e-25	1.46429e-26	95	20	9921	19207
[OVER]	GO:0009892	negative regulation of metabolic process	BIOLOGICAL_PROCESS	7.44273e-25	2.69222e-26	85	14	9931	19213
[OVER]	GO:0044255	cellular lipid metabolic process	BIOLOGICAL_PROCESS	1.39099e-24	5.05305e-26	166	81	9850	19146
[OVER]	GO:0010605	negative regulation of macromolecule metabolic process	BIOLOGICAL_PROCESS	3.46833e-24	1.27603e-25	80	12	9936	19215
[OVER]	GO:1901293	nucleoside phosphate biosynthetic process	BIOLOGICAL_PROCESS	3.60544e-24	1.33762e-25	88	17	9928	19210
[OVER]	GO:0065009	regulation of molecular function	BIOLOGICAL_PROCESS	3.60544e-24	1.33762e-25	88	17	9928	19210
[OVER]	GO:0051603	proteolysis involved in protein catabolic process	BIOLOGICAL_PROCESS	3.65397e-24	1.36692e-25	91	19	9925	19208
[OVER]	GO:0044262	cellular carbohydrate metabolic process	BIOLOGICAL_PROCESS	3.65397e-24	1.36692e-25	91	19	9925	19208
[OVER]	GO:1903506	regulation of nucleic acid-templated transcription	BIOLOGICAL_PROCESS	6.46334e-24	2.44786e-25	192	110	9824	19117
[OVER]	GO:2001141	regulation of RNA biosynthetic process	BIOLOGICAL_PROCESS	6.46334e-24	2.44786e-25	192	110	9824	19117
[OVER]	GO:0006355	regulation of DNA-templated transcription	BIOLOGICAL_PROCESS	6.46334e-24	2.44786e-25	192	110	9824	19117
[OVER]	GO:0098660	inorganic ion transmembrane transport	BIOLOGICAL_PROCESS	8.56887e-24	3.25853e-25	79	12	9937	19215
[OVER]	GO:0009165	nucleotide biosynthetic process	BIOLOGICAL_PROCESS	8.59244e-24	3.29406e-25	87	17	9929	19210
[OVER]	GO:0006364	rRNA processing	BIOLOGICAL_PROCESS	8.59244e-24	3.29406e-25	87	17	9929	19210
[OVER]	GO:0006163	purine nucleotide metabolic process	BIOLOGICAL_PROCESS	1.07401e-23	4.13399e-25	101	27	9915	19200
[OVER]	GO:0043632	modification-dependent macromolecule catabolic process	BIOLOGICAL_PROCESS	1.91811e-23	7.44237e-25	92	21	9924	19206
[OVER]	GO:0048522	positive regulation of cellular process	BIOLOGICAL_PROCESS	1.91811e-23	7.41398e-25	118	41	9898	19186
[OVER]	GO:1901607	alpha-amino acid biosynthetic process	BIOLOGICAL_PROCESS	3.27305e-23	1.27502e-24	87	18	9929	19209
[OVER]	GO:0006511	ubiquitin-dependent protein catabolic process	BIOLOGICAL_PROCESS	1.92097e-22	7.54253e-24	85	18	9931	19209
[OVER]	GO:0019941	modification-dependent protein catabolic process	BIOLOGICAL_PROCESS	2.88794e-22	1.13839e-23	86	19	9930	19208
[OVER]	GO:0019693	ribose phosphate metabolic process	BIOLOGICAL_PROCESS	2.98989e-22	1.1832e-23	97	27	9919	19200
[OVER]	GO:0050790	regulation of catalytic activity	BIOLOGICAL_PROCESS	2.7529e-21	1.10644e-22	79	16	9937	19211
[OVER]	GO:0051301	cell division	BIOLOGICAL_PROCESS	6.21951e-21	2.51895e-22	65	8	9951	19219
[OVER]	GO:0009259	ribonucleotide metabolic process	BIOLOGICAL_PROCESS	6.26017e-21	2.5451e-22	92	26	9924	19201
[OVER]	GO:0072522	purine-containing compound biosynthetic process	BIOLOGICAL_PROCESS	7.46489e-21	3.05796e-22	70	11	9946	19216
[OVER]	GO:0070647	protein modification by small protein conjugation or removal	BIOLOGICAL_PROCESS	9.97494e-21	4.11703e-22	68	10	9948	19217
[OVER]	GO:0016052	carbohydrate catabolic process	BIOLOGICAL_PROCESS	1.31524e-20	5.44881e-22	123	53	9893	19174
[OVER]	GO:0008380	RNA splicing	BIOLOGICAL_PROCESS	2.46583e-20	1.02918e-21	75	15	9941	19212
[OVER]	GO:0098662	inorganic cation transmembrane transport	BIOLOGICAL_PROCESS	2.51464e-20	1.05343e-21	67	10	9949	19217
[OVER]	GO:0071554	cell wall organization or biogenesis	BIOLOGICAL_PROCESS	3.26053e-20	1.37599e-21	65	9	9951	19218
[OVER]	GO:0051246	regulation of protein metabolic process	BIOLOGICAL_PROCESS	3.72715e-20	1.57867e-21	73	14	9943	19213
[OVER]	GO:0006091	generation of precursor metabolites and energy	BIOLOGICAL_PROCESS	4.65405e-20	1.97846e-21	91	27	9925	19200
[OVER]	GO:0051128	regulation of cellular component organization	BIOLOGICAL_PROCESS	5.55816e-20	2.37139e-21	71	13	9945	19214
[OVER]	GO:0006164	purine nucleotide biosynthetic process	BIOLOGICAL_PROCESS	1.58977e-19	6.85648e-21	65	10	9951	19217
[OVER]	GO:0007059	chromosome segregation	BIOLOGICAL_PROCESS	2.87758e-19	1.24551e-20	51	3	9965	19224
[OVER]	GO:0046390	ribose phosphate biosynthetic process	BIOLOGICAL_PROCESS	4.01472e-19	1.74391e-20	64	10	9952	19217
[OVER]	GO:0090305	nucleic acid phosphodiester bond hydrolysis	BIOLOGICAL_PROCESS	5.38001e-19	2.34528e-20	70	14	9946	19213
[OVER]	GO:0009150	purine ribonucleotide metabolic process	BIOLOGICAL_PROCESS	6.90477e-19	3.02064e-20	81	22	9935	19205
[OVER]	GO:0005976	polysaccharide metabolic process	BIOLOGICAL_PROCESS	8.35188e-19	3.66661e-20	97	35	9919	19192
[OVER]	GO:0006457	protein folding	BIOLOGICAL_PROCESS	1.00243e-18	4.41631e-20	54	5	9962	19222
[OVER]	GO:0048193	Golgi vesicle transport	BIOLOGICAL_PROCESS	1.76327e-18	7.79555e-20	59	8	9957	19219
[OVER]	GO:0006468	protein phosphorylation	BIOLOGICAL_PROCESS	2.14195e-18	9.50286e-20	91	31	9925	19196
[OVER]	GO:0010629	negative regulation of gene expression	BIOLOGICAL_PROCESS	2.49545e-18	1.11097e-19	55	6	9961	19221
[OVER]	GO:0009260	ribonucleotide biosynthetic process	BIOLOGICAL_PROCESS	2.50924e-18	1.12099e-19	62	10	9954	19217
[OVER]	GO:0048523	negative regulation of cellular process	BIOLOGICAL_PROCESS	3.68227e-18	1.65073e-19	83	25	9933	19202
[OVER]	GO:0006644	phospholipid metabolic process	BIOLOGICAL_PROCESS	1.53846e-17	7.0157e-19	80	24	9936	19203
[OVER]	GO:0035556	intracellular signal transduction	BIOLOGICAL_PROCESS	1.78515e-17	8.16826e-19	84	27	9932	19200
[OVER]	GO:0000398	mRNA splicing, via spliceosome	BIOLOGICAL_PROCESS	2.89921e-17	1.33555e-18	56	8	9960	19219
[OVER]	GO:0000377	RNA splicing, via transesterification reactions with bulged adenosine as nucleophile	BIOLOGICAL_PROCESS	2.89921e-17	1.33555e-18	56	8	9960	19219
[OVER]	GO:0009893	positive regulation of metabolic process	BIOLOGICAL_PROCESS	4.15104e-17	1.91863e-18	92	35	9924	19192
[OVER]	GO:0009152	purine ribonucleotide biosynthetic process	BIOLOGICAL_PROCESS	4.38894e-17	2.04216e-18	52	6	9964	19221
[OVER]	GO:0048285	organelle fission	BIOLOGICAL_PROCESS	4.87907e-17	2.27775e-18	48	4	9968	19223
[OVER]	GO:0000375	RNA splicing, via transesterification reactions	BIOLOGICAL_PROCESS	5.38758e-17	2.5318e-18	57	9	9959	19218
[OVER]	GO:0072594	establishment of protein localization to organelle	BIOLOGICAL_PROCESS	5.38758e-17	2.5318e-18	57	9	9959	19218
[OVER]	GO:0051276	chromosome organization	BIOLOGICAL_PROCESS	6.30393e-17	2.97217e-18	66	15	9950	19212
[OVER]	GO:0007005	mitochondrion organization	BIOLOGICAL_PROCESS	6.47876e-17	3.06462e-18	60	11	9956	19216
[OVER]	GO:0044270	cellular nitrogen compound catabolic process	BIOLOGICAL_PROCESS	1.01799e-16	4.84682e-18	64	14	9952	19213
[OVER]	GO:0006366	transcription by RNA polymerase II	BIOLOGICAL_PROCESS	1.11259e-16	5.31444e-18	129	72	9887	19155
[OVER]	GO:0042221	response to chemical	BIOLOGICAL_PROCESS	1.11826e-16	5.3588e-18	86	31	9930	19196
[OVER]	GO:0019439	aromatic compound catabolic process	BIOLOGICAL_PROCESS	1.24114e-16	5.96683e-18	68	17	9948	19210
[OVER]	GO:0010604	positive regulation of macromolecule metabolic process	BIOLOGICAL_PROCESS	3.63712e-16	1.76543e-17	87	33	9929	19194
[OVER]	GO:0018193	peptidyl-amino acid modification	BIOLOGICAL_PROCESS	3.86115e-16	1.88014e-17	58	11	9958	19216
[OVER]	GO:1901361	organic cyclic compound catabolic process	BIOLOGICAL_PROCESS	5.09018e-16	2.5022e-17	69	19	9947	19208
[OVER]	GO:0044282	small molecule catabolic process	BIOLOGICAL_PROCESS	5.09018e-16	2.5022e-17	69	19	9947	19208
[OVER]	GO:0034655	nucleobase-containing compound catabolic process	BIOLOGICAL_PROCESS	8.26502e-16	4.08843e-17	54	9	9962	19218
[OVER]	GO:0010498	proteasomal protein catabolic process	BIOLOGICAL_PROCESS	9.1986e-16	4.56446e-17	60	13	9956	19214
[OVER]	GO:0033043	regulation of organelle organization	BIOLOGICAL_PROCESS	1.14487e-15	5.7164e-17	52	8	9964	19219
[OVER]	GO:0044264	cellular polysaccharide metabolic process	BIOLOGICAL_PROCESS	1.14487e-15	5.7164e-17	52	8	9964	19219
[OVER]	GO:0051173	positive regulation of nitrogen compound metabolic process	BIOLOGICAL_PROCESS	1.33068e-15	6.72643e-17	86	34	9930	19193
[OVER]	GO:0046700	heterocycle catabolic process	BIOLOGICAL_PROCESS	1.88786e-15	9.57209e-17	62	15	9954	19212
[OVER]	GO:0022618	ribonucleoprotein complex assembly	BIOLOGICAL_PROCESS	1.89411e-15	9.63304e-17	48	6	9968	19221
[OVER]	GO:0009451	RNA modification	BIOLOGICAL_PROCESS	2.15896e-15	1.10134e-16	59	13	9957	19214
[OVER]	GO:0000272	polysaccharide catabolic process	BIOLOGICAL_PROCESS	2.70732e-15	1.38526e-16	85	34	9931	19193
[OVER]	GO:0007010	cytoskeleton organization	BIOLOGICAL_PROCESS	3.47971e-15	1.78585e-16	64	17	9952	19210
[OVER]	GO:0043161	proteasome-mediated ubiquitin-dependent protein catabolic process	BIOLOGICAL_PROCESS	5.11611e-15	2.6494e-16	58	13	9958	19214
[OVER]	GO:0044272	sulfur compound biosynthetic process	BIOLOGICAL_PROCESS	5.75636e-15	2.98986e-16	45	5	9971	19222
[OVER]	GO:0000280	nuclear division	BIOLOGICAL_PROCESS	6.21046e-15	3.24492e-16	43	4	9973	19223
[OVER]	GO:0065008	regulation of biological quality	BIOLOGICAL_PROCESS	8.20114e-15	4.31038e-16	53	10	9963	19217
[OVER]	GO:0051726	regulation of cell cycle	BIOLOGICAL_PROCESS	1.29104e-14	6.84534e-16	54	11	9962	19216
[OVER]	GO:0006260	DNA replication	BIOLOGICAL_PROCESS	1.29104e-14	6.84534e-16	54	11	9962	19216
[OVER]	GO:0031325	positive regulation of cellular metabolic process	BIOLOGICAL_PROCESS	1.3925e-14	7.40484e-16	84	35	9932	19192
[OVER]	GO:0006605	protein targeting	BIOLOGICAL_PROCESS	1.47054e-14	7.88802e-16	44	5	9972	19222
[OVER]	GO:0006401	RNA catabolic process	BIOLOGICAL_PROCESS	1.47054e-14	7.88802e-16	44	5	9972	19222
[OVER]	GO:0090501	RNA phosphodiester bond hydrolysis	BIOLOGICAL_PROCESS	1.47054e-14	7.88802e-16	44	5	9972	19222
[OVER]	GO:0015980	energy derivation by oxidation of organic compounds	BIOLOGICAL_PROCESS	1.68469e-14	9.06279e-16	58	14	9958	19213
[OVER]	GO:0030001	metal ion transport	BIOLOGICAL_PROCESS	3.05864e-14	1.66904e-15	53	11	9963	19216
[OVER]	GO:0006913	nucleocytoplasmic transport	BIOLOGICAL_PROCESS	3.05864e-14	1.66904e-15	53	11	9963	19216
[OVER]	GO:0051169	nuclear transport	BIOLOGICAL_PROCESS	3.05864e-14	1.66904e-15	53	11	9963	19216
[OVER]	GO:0008033	tRNA processing	BIOLOGICAL_PROCESS	4.17747e-14	2.29247e-15	64	19	9952	19208
[OVER]	GO:0071826	ribonucleoprotein complex subunit organization	BIOLOGICAL_PROCESS	4.2577e-14	2.34967e-15	48	8	9968	19219
[OVER]	GO:0006413	translational initiation	BIOLOGICAL_PROCESS	5.95026e-14	3.29292e-15	46	7	9970	19220
[OVER]	GO:0006575	cellular modified amino acid metabolic process	BIOLOGICAL_PROCESS	9.66362e-14	5.4525e-15	42	5	9974	19222
[OVER]	GO:0098813	nuclear chromosome segregation	BIOLOGICAL_PROCESS	1.10709e-13	6.28076e-15	38	3	9978	19224
[OVER]	GO:0006325	chromatin organization	BIOLOGICAL_PROCESS	2.03678e-13	1.16181e-14	59	17	9957	19210
[OVER]	GO:0006261	DNA-templated DNA replication	BIOLOGICAL_PROCESS	2.49721e-13	1.4283e-14	41	5	9975	19222
[OVER]	GO:0032259	methylation	BIOLOGICAL_PROCESS	2.50284e-13	1.43539e-14	71	27	9945	19200
[OVER]	GO:0032446	protein modification by small protein conjugation	BIOLOGICAL_PROCESS	4.99085e-13	2.90857e-14	42	6	9974	19221
[OVER]	GO:0042274	ribosomal small subunit biogenesis	BIOLOGICAL_PROCESS	6.92816e-13	4.09114e-14	34	2	9982	19225
[OVER]	GO:0008610	lipid biosynthetic process	BIOLOGICAL_PROCESS	7.01626e-13	4.15401e-14	115	72	9901	19155
[OVER]	GO:0044772	mitotic cell cycle phase transition	BIOLOGICAL_PROCESS	7.78508e-13	4.62122e-14	36	3	9980	19224
[OVER]	GO:0019725	cellular homeostasis	BIOLOGICAL_PROCESS	8.03491e-13	4.79436e-14	52	13	9964	19214
[OVER]	GO:0006820	anion transport	BIOLOGICAL_PROCESS	9.54161e-13	5.70815e-14	49	11	9967	19216
[OVER]	GO:0051172	negative regulation of nitrogen compound metabolic process	BIOLOGICAL_PROCESS	1.5427e-12	9.30053e-14	47	10	9969	19217
[OVER]	GO:0042592	homeostatic process	BIOLOGICAL_PROCESS	1.59184e-12	9.6214e-14	59	19	9957	19208
[OVER]	GO:0032787	monocarboxylic acid metabolic process	BIOLOGICAL_PROCESS	1.73063e-12	1.05138e-13	88	45	9928	19182
[OVER]	GO:0140014	mitotic nuclear division	BIOLOGICAL_PROCESS	1.85773e-12	1.13146e-13	33	2	9983	19225
[OVER]	GO:0006402	mRNA catabolic process	BIOLOGICAL_PROCESS	2.0466e-12	1.24966e-13	35	3	9981	19224
[OVER]	GO:0030029	actin filament-based process	BIOLOGICAL_PROCESS	2.2069e-12	1.35778e-13	42	7	9974	19220
[OVER]	GO:0030036	actin cytoskeleton organization	BIOLOGICAL_PROCESS	2.2069e-12	1.35778e-13	42	7	9974	19220
[OVER]	GO:0010608	post-transcriptional regulation of gene expression	BIOLOGICAL_PROCESS	2.2069e-12	1.35778e-13	42	7	9974	19220
[OVER]	GO:0006357	regulation of transcription by RNA polymerase II	BIOLOGICAL_PROCESS	2.27203e-12	1.40136e-13	110	69	9906	19158
[OVER]	GO:0007346	regulation of mitotic cell cycle	BIOLOGICAL_PROCESS	3.55859e-12	2.2114e-13	30	1	9986	19226
[OVER]	GO:1901615	organic hydroxy compound metabolic process	BIOLOGICAL_PROCESS	4.02987e-12	2.51049e-13	66	26	9950	19201
[OVER]	GO:0031324	negative regulation of cellular metabolic process	BIOLOGICAL_PROCESS	5.23241e-12	3.26773e-13	47	11	9969	19216
[OVER]	GO:0031327	negative regulation of cellular biosynthetic process	BIOLOGICAL_PROCESS	5.4524e-12	3.41354e-13	41	7	9975	19220
[OVER]	GO:0045333	cellular respiration	BIOLOGICAL_PROCESS	7.20978e-12	4.55835e-13	48	12	9968	19215
[OVER]	GO:0009064	glutamine family amino acid metabolic process	BIOLOGICAL_PROCESS	8.88711e-12	5.66006e-13	42	8	9974	19219
[OVER]	GO:0009890	negative regulation of biosynthetic process	BIOLOGICAL_PROCESS	8.88711e-12	5.66006e-13	42	8	9974	19219
[OVER]	GO:0061024	membrane organization	BIOLOGICAL_PROCESS	9.61895e-12	6.14102e-13	49	13	9967	19214
[OVER]	GO:0055082	cellular chemical homeostasis	BIOLOGICAL_PROCESS	1.20879e-11	7.77332e-13	46	11	9970	19216
[OVER]	GO:2000112	regulation of cellular macromolecule biosynthetic process	BIOLOGICAL_PROCESS	1.32042e-11	8.55241e-13	40	7	9976	19220
[OVER]	GO:0044770	cell cycle phase transition	BIOLOGICAL_PROCESS	1.32042e-11	8.55241e-13	40	7	9976	19220
[OVER]	GO:0006873	cellular ion homeostasis	BIOLOGICAL_PROCESS	1.32042e-11	8.55241e-13	40	7	9976	19220
[OVER]	GO:0000819	sister chromatid segregation	BIOLOGICAL_PROCESS	1.3948e-11	9.07732e-13	33	3	9983	19224
[OVER]	GO:0043414	macromolecule methylation	BIOLOGICAL_PROCESS	2.12826e-11	1.39493e-12	41	8	9975	19219
[OVER]	GO:0051640	organelle localization	BIOLOGICAL_PROCESS	2.12826e-11	1.39493e-12	41	8	9975	19219
[OVER]	GO:0008654	phospholipid biosynthetic process	BIOLOGICAL_PROCESS	2.23512e-11	1.46843e-12	58	21	9958	19206
[OVER]	GO:0046486	glycerolipid metabolic process	BIOLOGICAL_PROCESS	2.29339e-11	1.51026e-12	57	20	9959	19207
[OVER]	GO:0048878	chemical homeostasis	BIOLOGICAL_PROCESS	2.58547e-11	1.71059e-12	53	17	9963	19210
[OVER]	GO:0044036	cell wall macromolecule metabolic process	BIOLOGICAL_PROCESS	2.66576e-11	1.77195e-12	28	1	9988	19226
[OVER]	GO:0022900	electron transport chain	BIOLOGICAL_PROCESS	2.66576e-11	1.77195e-12	28	1	9988	19226
[OVER]	GO:0006417	regulation of translation	BIOLOGICAL_PROCESS	3.17448e-11	2.13507e-12	39	7	9977	19220
[OVER]	GO:0030003	cellular cation homeostasis	BIOLOGICAL_PROCESS	3.17448e-11	2.13507e-12	39	7	9977	19220
[OVER]	GO:0061919	process utilizing autophagic mechanism	BIOLOGICAL_PROCESS	3.17448e-11	2.13507e-12	39	7	9977	19220
[OVER]	GO:0006914	autophagy	BIOLOGICAL_PROCESS	3.17448e-11	2.13507e-12	39	7	9977	19220
[OVER]	GO:0010564	regulation of cell cycle process	BIOLOGICAL_PROCESS	3.17448e-11	2.13955e-12	42	9	9974	19218
[OVER]	GO:0050801	ion homeostasis	BIOLOGICAL_PROCESS	4.61357e-11	3.1166e-12	43	10	9973	19217
[OVER]	GO:1902600	proton transmembrane transport	BIOLOGICAL_PROCESS	4.62742e-11	3.13311e-12	37	6	9979	19221
[OVER]	GO:0000003	reproduction	BIOLOGICAL_PROCESS	6.12436e-11	4.15612e-12	53	18	9963	19209
[OVER]	GO:0006352	DNA-templated transcription initiation	BIOLOGICAL_PROCESS	6.3985e-11	4.35205e-12	35	5	9981	19222
[OVER]	GO:0034248	regulation of amide metabolic process	BIOLOGICAL_PROCESS	7.58554e-11	5.17116e-12	41	9	9975	19218
[OVER]	GO:0070887	cellular response to chemical stimulus	BIOLOGICAL_PROCESS	8.00632e-11	5.47039e-12	58	22	9958	19205
[OVER]	GO:0009060	aerobic respiration	BIOLOGICAL_PROCESS	8.51752e-11	5.83283e-12	45	12	9971	19215
[OVER]	GO:0030490	maturation of SSU-rRNA	BIOLOGICAL_PROCESS	9.43034e-11	6.50167e-12	29	2	9987	19225
[OVER]	GO:0010383	cell wall polysaccharide metabolic process	BIOLOGICAL_PROCESS	9.65585e-11	6.67207e-12	24	0	9992	19227
[OVER]	GO:0098771	inorganic ion homeostasis	BIOLOGICAL_PROCESS	1.06943e-10	7.42269e-12	42	10	9974	19217
[OVER]	GO:0055080	cation homeostasis	BIOLOGICAL_PROCESS	1.06943e-10	7.42269e-12	42	10	9974	19217
[OVER]	GO:0009894	regulation of catabolic process	BIOLOGICAL_PROCESS	1.13159e-10	7.90662e-12	36	6	9980	19221
[OVER]	GO:0006643	membrane lipid metabolic process	BIOLOGICAL_PROCESS	1.45743e-10	1.02059e-11	43	11	9973	19216
[OVER]	GO:0045935	positive regulation of nucleobase-containing compound metabolic process	BIOLOGICAL_PROCESS	1.7534e-10	1.23055e-11	65	30	9951	19197
[OVER]	GO:0010558	negative regulation of macromolecule biosynthetic process	BIOLOGICAL_PROCESS	1.87034e-10	1.31551e-11	37	7	9979	19220
[OVER]	GO:1901990	regulation of mitotic cell cycle phase transition	BIOLOGICAL_PROCESS	1.9957e-10	1.41294e-11	26	1	9990	19226
[OVER]	GO:0000956	nuclear-transcribed mRNA catabolic process	BIOLOGICAL_PROCESS	2.45287e-10	1.7442e-11	30	3	9986	19224
[OVER]	GO:0015931	nucleobase-containing compound transport	BIOLOGICAL_PROCESS	2.84912e-10	2.03918e-11	38	8	9978	19219
[OVER]	GO:0051656	establishment of organelle localization	BIOLOGICAL_PROCESS	5.30861e-10	3.8241e-11	31	4	9985	19223
[OVER]	GO:0006888	endoplasmic reticulum to Golgi vesicle-mediated transport	BIOLOGICAL_PROCESS	6.42163e-10	4.64573e-11	29	3	9987	19224
[OVER]	GO:0007034	vacuolar transport	BIOLOGICAL_PROCESS	6.85051e-10	4.97718e-11	34	6	9982	19221
[OVER]	GO:0009123	nucleoside monophosphate metabolic process	BIOLOGICAL_PROCESS	9.74907e-10	7.11325e-11	38	9	9978	19218
[OVER]	GO:0070925	organelle assembly	BIOLOGICAL_PROCESS	9.91893e-10	7.26785e-11	32	5	9984	19222
[OVER]	GO:0044087	regulation of cellular component biogenesis	BIOLOGICAL_PROCESS	1.08584e-09	7.973e-11	35	7	9981	19220
[OVER]	GO:0006400	tRNA modification	BIOLOGICAL_PROCESS	1.3263e-09	9.75915e-11	39	10	9977	19217
[OVER]	GO:0006650	glycerophospholipid metabolic process	BIOLOGICAL_PROCESS	1.5229e-09	1.12764e-10	49	18	9967	19209
[OVER]	GO:0009161	ribonucleoside monophosphate metabolic process	BIOLOGICAL_PROCESS	1.59797e-09	1.1931e-10	36	8	9980	19219
[OVER]	GO:0006418	tRNA aminoacylation for protein translation	BIOLOGICAL_PROCESS	1.65532e-09	1.24104e-10	33	6	9983	19221
[OVER]	GO:0016567	protein ubiquitination	BIOLOGICAL_PROCESS	1.65532e-09	1.24104e-10	33	6	9983	19221
[OVER]	GO:0051254	positive regulation of RNA metabolic process	BIOLOGICAL_PROCESS	1.65797e-09	1.24559e-10	62	30	9954	19197
[OVER]	GO:0006338	chromatin remodeling	BIOLOGICAL_PROCESS	1.70839e-09	1.28611e-10	40	11	9976	19216
[OVER]	GO:0000462	maturation of SSU-rRNA from tricistronic rRNA transcript (SSU-rRNA, 5.8S rRNA, LSU-rRNA)	BIOLOGICAL_PROCESS	1.75578e-09	1.32722e-10	26	2	9990	19225
[OVER]	GO:0000070	mitotic sister chromatid segregation	BIOLOGICAL_PROCESS	1.75578e-09	1.32722e-10	26	2	9990	19225
[OVER]	GO:0016054	organic acid catabolic process	BIOLOGICAL_PROCESS	1.79071e-09	1.35916e-10	44	14	9972	19213
[OVER]	GO:0046395	carboxylic acid catabolic process	BIOLOGICAL_PROCESS	1.79071e-09	1.35916e-10	44	14	9972	19213
[OVER]	GO:0009100	glycoprotein metabolic process	BIOLOGICAL_PROCESS	1.98994e-09	1.51345e-10	43	13	9973	19214
[OVER]	GO:0016998	cell wall macromolecule catabolic process	BIOLOGICAL_PROCESS	2.17951e-09	1.66774e-10	21	0	9995	19227
[OVER]	GO:0044347	cell wall polysaccharide catabolic process	BIOLOGICAL_PROCESS	2.17951e-09	1.66774e-10	21	0	9995	19227
[OVER]	GO:0002181	cytoplasmic translation	BIOLOGICAL_PROCESS	2.38494e-09	1.84336e-10	31	5	9985	19222
[OVER]	GO:0071555	cell wall organization	BIOLOGICAL_PROCESS	2.38494e-09	1.84336e-10	31	5	9985	19222
[OVER]	GO:0045229	external encapsulating structure organization	BIOLOGICAL_PROCESS	2.38494e-09	1.84336e-10	31	5	9985	19222
[OVER]	GO:0016042	lipid catabolic process	BIOLOGICAL_PROCESS	2.51754e-09	1.94974e-10	34	7	9982	19220
[OVER]	GO:0043039	tRNA aminoacylation	BIOLOGICAL_PROCESS	3.68531e-09	2.86553e-10	35	8	9981	19219
[OVER]	GO:0043038	amino acid activation	BIOLOGICAL_PROCESS	3.68531e-09	2.86553e-10	35	8	9981	19219
[OVER]	GO:0000096	sulfur amino acid metabolic process	BIOLOGICAL_PROCESS	4.19064e-09	3.26493e-10	27	3	9989	19224
[OVER]	GO:1901987	regulation of cell cycle phase transition	BIOLOGICAL_PROCESS	5.9519e-09	4.65553e-10	30	5	9986	19222
[OVER]	GO:0097435	supramolecular fiber organization	BIOLOGICAL_PROCESS	6.0309e-09	4.74529e-10	33	7	9983	19220
[OVER]	GO:0009156	ribonucleoside monophosphate biosynthetic process	BIOLOGICAL_PROCESS	6.0309e-09	4.74529e-10	33	7	9983	19220
[OVER]	GO:0045493	xylan catabolic process	BIOLOGICAL_PROCESS	6.11243e-09	4.87558e-10	20	0	9996	19227
[OVER]	GO:0045491	xylan metabolic process	BIOLOGICAL_PROCESS	6.11243e-09	4.87558e-10	20	0	9996	19227
[OVER]	GO:0010410	hemicellulose metabolic process	BIOLOGICAL_PROCESS	6.11243e-09	4.87558e-10	20	0	9996	19227
[OVER]	GO:2000895	hemicellulose catabolic process	BIOLOGICAL_PROCESS	6.11243e-09	4.87558e-10	20	0	9996	19227
[OVER]	GO:0031329	regulation of cellular catabolic process	BIOLOGICAL_PROCESS	8.26335e-09	6.61681e-10	28	4	9988	19223
[OVER]	GO:0009124	nucleoside monophosphate biosynthetic process	BIOLOGICAL_PROCESS	8.50237e-09	6.84764e-10	34	8	9982	19219
[OVER]	GO:0022414	reproductive process	BIOLOGICAL_PROCESS	8.50237e-09	6.84764e-10	34	8	9982	19219
[OVER]	GO:0051321	meiotic cell cycle	BIOLOGICAL_PROCESS	1.06103e-08	8.61096e-10	26	3	9990	19224
[OVER]	GO:0051668	localization within membrane	BIOLOGICAL_PROCESS	1.15011e-08	9.36942e-10	35	9	9981	19218
[OVER]	GO:0043648	dicarboxylic acid metabolic process	BIOLOGICAL_PROCESS	1.49153e-08	1.22661e-09	36	10	9980	19217
[OVER]	GO:0009101	glycoprotein biosynthetic process	BIOLOGICAL_PROCESS	1.63288e-08	1.34538e-09	39	12	9977	19215
[OVER]	GO:0045787	positive regulation of cell cycle	BIOLOGICAL_PROCESS	1.7266e-08	1.42527e-09	19	0	9997	19227
[OVER]	GO:0042440	pigment metabolic process	BIOLOGICAL_PROCESS	2.03748e-08	1.69764e-09	27	4	9989	19223
[OVER]	GO:0006414	translational elongation	BIOLOGICAL_PROCESS	2.03748e-08	1.69764e-09	27	4	9989	19223
[OVER]	GO:0009896	positive regulation of catabolic process	BIOLOGICAL_PROCESS	2.24215e-08	1.87164e-09	30	6	9986	19221
[OVER]	GO:0070085	glycosylation	BIOLOGICAL_PROCESS	2.51638e-08	2.10444e-09	43	16	9973	19211
[OVER]	GO:0009066	aspartate family amino acid metabolic process	BIOLOGICAL_PROCESS	2.6128e-08	2.18911e-09	34	9	9982	19218
[OVER]	GO:0000910	cytokinesis	BIOLOGICAL_PROCESS	2.68071e-08	2.26258e-09	25	3	9991	19224
[OVER]	GO:1903046	meiotic cell cycle process	BIOLOGICAL_PROCESS	2.68071e-08	2.26258e-09	25	3	9991	19224
[OVER]	GO:0043413	macromolecule glycosylation	BIOLOGICAL_PROCESS	3.13221e-08	2.65819e-09	38	12	9978	19215
[OVER]	GO:0006486	protein glycosylation	BIOLOGICAL_PROCESS	3.13221e-08	2.65819e-09	38	12	9978	19215
[OVER]	GO:0006403	RNA localization	BIOLOGICAL_PROCESS	3.24392e-08	2.76804e-09	31	7	9985	19220
[OVER]	GO:0006875	cellular metal ion homeostasis	BIOLOGICAL_PROCESS	3.24392e-08	2.76804e-09	31	7	9985	19220
[OVER]	GO:0051247	positive regulation of protein metabolic process	BIOLOGICAL_PROCESS	3.24392e-08	2.76804e-09	31	7	9985	19220
[OVER]	GO:0044042	glucan metabolic process	BIOLOGICAL_PROCESS	3.29936e-08	2.82044e-09	35	10	9981	19217
[OVER]	GO:0009891	positive regulation of biosynthetic process	BIOLOGICAL_PROCESS	3.39045e-08	2.90356e-09	59	32	9957	19195
[OVER]	GO:0010256	endomembrane system organization	BIOLOGICAL_PROCESS	3.40776e-08	2.92891e-09	28	5	9988	19222
[OVER]	GO:0072527	pyrimidine-containing compound metabolic process	BIOLOGICAL_PROCESS	4.46049e-08	3.84751e-09	32	8	9984	19219
[OVER]	GO:0010638	positive regulation of organelle organization	BIOLOGICAL_PROCESS	4.8041e-08	4.16618e-09	18	0	9998	19227
[OVER]	GO:0022904	respiratory electron transport chain	BIOLOGICAL_PROCESS	4.8041e-08	4.16618e-09	18	0	9998	19227
[OVER]	GO:0010557	positive regulation of macromolecule biosynthetic process	BIOLOGICAL_PROCESS	4.83976e-08	4.20458e-09	57	30	9959	19197
[OVER]	GO:0140694	non-membrane-bounded organelle assembly	BIOLOGICAL_PROCESS	4.94704e-08	4.33602e-09	26	4	9990	19223
[OVER]	GO:0090502	RNA phosphodiester bond hydrolysis, endonucleolytic	BIOLOGICAL_PROCESS	4.94704e-08	4.33602e-09	26	4	9990	19223
[OVER]	GO:0046148	pigment biosynthetic process	BIOLOGICAL_PROCESS	4.94704e-08	4.33602e-09	26	4	9990	19223
[OVER]	GO:0015698	inorganic anion transport	BIOLOGICAL_PROCESS	4.94704e-08	4.33602e-09	26	4	9990	19223
[OVER]	GO:0046488	phosphatidylinositol metabolic process	BIOLOGICAL_PROCESS	5.79146e-08	5.0851e-09	33	9	9983	19218
[OVER]	GO:0009199	ribonucleoside triphosphate metabolic process	BIOLOGICAL_PROCESS	6.13067e-08	5.39241e-09	37	12	9979	19215
[OVER]	GO:0048856	anatomical structure development	BIOLOGICAL_PROCESS	7.03746e-08	6.21176e-09	36	11	9980	19216
[OVER]	GO:0010033	response to organic substance	BIOLOGICAL_PROCESS	7.25259e-08	6.4465e-09	34	10	9982	19217
[OVER]	GO:0005996	monosaccharide metabolic process	BIOLOGICAL_PROCESS	7.25259e-08	6.4465e-09	34	10	9982	19217
[OVER]	GO:0016051	carbohydrate biosynthetic process	BIOLOGICAL_PROCESS	7.42091e-08	6.63052e-09	30	7	9986	19220
[OVER]	GO:0072657	protein localization to membrane	BIOLOGICAL_PROCESS	7.42091e-08	6.63052e-09	30	7	9986	19220
[OVER]	GO:0000469	cleavage involved in rRNA processing	BIOLOGICAL_PROCESS	7.89889e-08	7.13085e-09	22	2	9994	19225
[OVER]	GO:0000097	sulfur amino acid biosynthetic process	BIOLOGICAL_PROCESS	7.89889e-08	7.13085e-09	22	2	9994	19225
[OVER]	GO:0006766	vitamin metabolic process	BIOLOGICAL_PROCESS	7.98148e-08	7.29179e-09	27	5	9989	19222
[OVER]	GO:0006767	water-soluble vitamin metabolic process	BIOLOGICAL_PROCESS	7.98148e-08	7.29179e-09	27	5	9989	19222
[OVER]	GO:0016197	endosomal transport	BIOLOGICAL_PROCESS	7.98148e-08	7.29179e-09	27	5	9989	19222
[OVER]	GO:0090150	establishment of protein localization to membrane	BIOLOGICAL_PROCESS	7.98148e-08	7.29179e-09	27	5	9989	19222
[OVER]	GO:0009067	aspartate family amino acid biosynthetic process	BIOLOGICAL_PROCESS	7.98148e-08	7.29179e-09	27	5	9989	19222
[OVER]	GO:0006119	oxidative phosphorylation	BIOLOGICAL_PROCESS	7.98148e-08	7.29179e-09	27	5	9989	19222
[OVER]	GO:0031328	positive regulation of cellular biosynthetic process	BIOLOGICAL_PROCESS	9.17233e-08	8.3939e-09	58	32	9958	19195
[OVER]	GO:0051168	nuclear export	BIOLOGICAL_PROCESS	9.82997e-08	9.04132e-09	31	8	9985	19219
[OVER]	GO:0006073	cellular glucan metabolic process	BIOLOGICAL_PROCESS	9.82997e-08	9.04132e-09	31	8	9985	19219
[OVER]	GO:0009141	nucleoside triphosphate metabolic process	BIOLOGICAL_PROCESS	9.97382e-08	9.18905e-09	40	15	9976	19212
[OVER]	GO:0031331	positive regulation of cellular catabolic process	BIOLOGICAL_PROCESS	1.19033e-07	1.10219e-08	25	4	9991	19223
[OVER]	GO:0006367	transcription initiation at RNA polymerase II promoter	BIOLOGICAL_PROCESS	1.19033e-07	1.10219e-08	25	4	9991	19223
[OVER]	GO:0072528	pyrimidine-containing compound biosynthetic process	BIOLOGICAL_PROCESS	1.20052e-07	1.11348e-08	28	6	9988	19221
[OVER]	GO:0022411	cellular component disassembly	BIOLOGICAL_PROCESS	1.26368e-07	1.17402e-08	32	9	9984	19218
[OVER]	GO:0009144	purine nucleoside triphosphate metabolic process	BIOLOGICAL_PROCESS	1.29077e-07	1.20118e-08	35	11	9981	19216
[OVER]	GO:0090068	positive regulation of cell cycle process	BIOLOGICAL_PROCESS	1.29992e-07	1.21773e-08	17	0	9999	19227
[OVER]	GO:0006289	nucleotide-excision repair	BIOLOGICAL_PROCESS	1.29992e-07	1.21773e-08	17	0	9999	19227
[OVER]	GO:0055065	metal ion homeostasis	BIOLOGICAL_PROCESS	1.56043e-07	1.46418e-08	33	10	9983	19217
[OVER]	GO:0042398	cellular modified amino acid biosynthetic process	BIOLOGICAL_PROCESS	1.63897e-07	1.54294e-08	23	3	9993	19224
[OVER]	GO:0031123	RNA 3'-end processing	BIOLOGICAL_PROCESS	1.63897e-07	1.54294e-08	23	3	9993	19224
[OVER]	GO:0007015	actin filament organization	BIOLOGICAL_PROCESS	1.90231e-07	1.80556e-08	26	5	9990	19222
[OVER]	GO:0071824	protein-DNA complex subunit organization	BIOLOGICAL_PROCESS	1.90231e-07	1.80556e-08	26	5	9990	19222
[OVER]	GO:0006479	protein methylation	BIOLOGICAL_PROCESS	2.0207e-07	1.92417e-08	19	1	9997	19226
[OVER]	GO:0008213	protein alkylation	BIOLOGICAL_PROCESS	2.0207e-07	1.92417e-08	19	1	9997	19226
[OVER]	GO:0098656	anion transmembrane transport	BIOLOGICAL_PROCESS	2.21381e-07	2.11148e-08	30	8	9986	19219
[OVER]	GO:0009205	purine ribonucleoside triphosphate metabolic process	BIOLOGICAL_PROCESS	2.49637e-07	2.39257e-08	34	11	9982	19216
[OVER]	GO:0050658	RNA transport	BIOLOGICAL_PROCESS	2.79128e-07	2.69247e-08	27	6	9989	19221
[OVER]	GO:0050657	nucleic acid transport	BIOLOGICAL_PROCESS	2.79128e-07	2.69247e-08	27	6	9989	19221
[OVER]	GO:0051236	establishment of RNA localization	BIOLOGICAL_PROCESS	2.79128e-07	2.69247e-08	27	6	9989	19221
[OVER]	GO:1903311	regulation of mRNA metabolic process	BIOLOGICAL_PROCESS	4.10924e-07	4.00189e-08	22	3	9994	19224
[OVER]	GO:0032502	developmental process	BIOLOGICAL_PROCESS	4.17965e-07	4.07692e-08	42	19	9974	19208
[OVER]	GO:0009126	purine nucleoside monophosphate metabolic process	BIOLOGICAL_PROCESS	4.53557e-07	4.44512e-08	25	5	9991	19222
[OVER]	GO:0009167	purine ribonucleoside monophosphate metabolic process	BIOLOGICAL_PROCESS	4.53557e-07	4.44512e-08	25	5	9991	19222
[OVER]	GO:0051493	regulation of cytoskeleton organization	BIOLOGICAL_PROCESS	4.53557e-07	4.44512e-08	25	5	9991	19222
[OVER]	GO:0030865	cortical cytoskeleton organization	BIOLOGICAL_PROCESS	5.16959e-07	5.12244e-08	20	2	9996	19225
[OVER]	GO:0044093	positive regulation of molecular function	BIOLOGICAL_PROCESS	5.16959e-07	5.12244e-08	20	2	9996	19225
[OVER]	GO:0071806	protein transmembrane transport	BIOLOGICAL_PROCESS	5.16959e-07	5.12244e-08	20	2	9996	19225
[OVER]	GO:0042273	ribosomal large subunit biogenesis	BIOLOGICAL_PROCESS	6.48895e-07	6.46989e-08	26	6	9990	19221
[OVER]	GO:0016311	dephosphorylation	BIOLOGICAL_PROCESS	6.48895e-07	6.46989e-08	26	6	9990	19221
[OVER]	GO:0006664	glycolipid metabolic process	BIOLOGICAL_PROCESS	6.99825e-07	7.01015e-08	23	4	9993	19223
[OVER]	GO:1903509	liposaccharide metabolic process	BIOLOGICAL_PROCESS	6.99825e-07	7.01015e-08	23	4	9993	19223
[OVER]	GO:0046916	cellular transition metal ion homeostasis	BIOLOGICAL_PROCESS	6.99825e-07	7.01015e-08	23	4	9993	19223
[OVER]	GO:0046467	membrane lipid biosynthetic process	BIOLOGICAL_PROCESS	8.71417e-07	8.78287e-08	27	7	9989	19220
[OVER]	GO:0045017	glycerolipid biosynthetic process	BIOLOGICAL_PROCESS	9.61816e-07	9.70885e-08	39	17	9977	19210
[OVER]	GO:0044275	cellular carbohydrate catabolic process	BIOLOGICAL_PROCESS	9.99805e-07	1.01078e-07	32	11	9984	19216
[OVER]	GO:0006778	porphyrin-containing compound metabolic process	BIOLOGICAL_PROCESS	1.01071e-06	1.03274e-07	21	3	9995	19224
[OVER]	GO:0033013	tetrapyrrole metabolic process	BIOLOGICAL_PROCESS	1.01071e-06	1.03274e-07	21	3	9995	19224
[OVER]	GO:0009142	nucleoside triphosphate biosynthetic process	BIOLOGICAL_PROCESS	1.01071e-06	1.03274e-07	21	3	9995	19224
[OVER]	GO:0051129	negative regulation of cellular component organization	BIOLOGICAL_PROCESS	1.01071e-06	1.03274e-07	21	3	9995	19224
[OVER]	GO:0000041	transition metal ion transport	BIOLOGICAL_PROCESS	1.01071e-06	1.03274e-07	21	3	9995	19224
[OVER]	GO:0048583	regulation of response to stimulus	BIOLOGICAL_PROCESS	1.0182e-06	1.04827e-07	33	12	9983	19215
[OVER]	GO:0009063	amino acid catabolic process	BIOLOGICAL_PROCESS	1.0182e-06	1.04827e-07	33	12	9983	19215
[OVER]	GO:0065004	protein-DNA complex assembly	BIOLOGICAL_PROCESS	1.03772e-06	1.08761e-07	24	5	9992	19222
[OVER]	GO:0042364	water-soluble vitamin biosynthetic process	BIOLOGICAL_PROCESS	1.03772e-06	1.08761e-07	24	5	9992	19222
[OVER]	GO:0072524	pyridine-containing compound metabolic process	BIOLOGICAL_PROCESS	1.03772e-06	1.08761e-07	24	5	9992	19222
[OVER]	GO:0034032	purine nucleoside bisphosphate metabolic process	BIOLOGICAL_PROCESS	1.03772e-06	1.08761e-07	24	5	9992	19222
[OVER]	GO:0009110	vitamin biosynthetic process	BIOLOGICAL_PROCESS	1.03772e-06	1.08761e-07	24	5	9992	19222
[OVER]	GO:0051130	positive regulation of cellular component organization	BIOLOGICAL_PROCESS	1.03772e-06	1.08761e-07	24	5	9992	19222
[OVER]	GO:0045934	negative regulation of nucleobase-containing compound metabolic process	BIOLOGICAL_PROCESS	1.03772e-06	1.08761e-07	24	5	9992	19222
[OVER]	GO:0033875	ribonucleoside bisphosphate metabolic process	BIOLOGICAL_PROCESS	1.03772e-06	1.08761e-07	24	5	9992	19222
[OVER]	GO:0033865	nucleoside bisphosphate metabolic process	BIOLOGICAL_PROCESS	1.03772e-06	1.08761e-07	24	5	9992	19222
[OVER]	GO:0000281	mitotic cytokinesis	BIOLOGICAL_PROCESS	1.28868e-06	1.36458e-07	19	2	9997	19225
[OVER]	GO:0009201	ribonucleoside triphosphate biosynthetic process	BIOLOGICAL_PROCESS	1.28868e-06	1.36458e-07	19	2	9997	19225
[OVER]	GO:0030866	cortical actin cytoskeleton organization	BIOLOGICAL_PROCESS	1.28868e-06	1.36458e-07	19	2	9997	19225
[OVER]	GO:0033044	regulation of chromosome organization	BIOLOGICAL_PROCESS	1.28868e-06	1.36458e-07	19	2	9997	19225
[OVER]	GO:0061640	cytoskeleton-dependent cytokinesis	BIOLOGICAL_PROCESS	1.28868e-06	1.36458e-07	19	2	9997	19225
[OVER]	GO:0002097	tRNA wobble base modification	BIOLOGICAL_PROCESS	1.28868e-06	1.36458e-07	19	2	9997	19225
[OVER]	GO:0018205	peptidyl-lysine modification	BIOLOGICAL_PROCESS	1.30892e-06	1.38804e-07	29	9	9987	19218
[OVER]	GO:1901617	organic hydroxy compound biosynthetic process	BIOLOGICAL_PROCESS	1.62153e-06	1.72957e-07	42	21	9974	19206
[OVER]	GO:0009127	purine nucleoside monophosphate biosynthetic process	BIOLOGICAL_PROCESS	1.63602e-06	1.75261e-07	22	4	9994	19223
[OVER]	GO:0009168	purine ribonucleoside monophosphate biosynthetic process	BIOLOGICAL_PROCESS	1.63602e-06	1.75261e-07	22	4	9994	19223
[OVER]	GO:0023051	regulation of signaling	BIOLOGICAL_PROCESS	1.96715e-06	2.11646e-07	31	11	9985	19216
[OVER]	GO:0046034	ATP metabolic process	BIOLOGICAL_PROCESS	1.96715e-06	2.11646e-07	31	11	9985	19216
[OVER]	GO:0006979	response to oxidative stress	BIOLOGICAL_PROCESS	2.06008e-06	2.22281e-07	32	12	9984	19215
[OVER]	GO:0046474	glycerophospholipid biosynthetic process	BIOLOGICAL_PROCESS	2.07434e-06	2.2414e-07	37	16	9979	19211
[OVER]	GO:0006779	porphyrin-containing compound biosynthetic process	BIOLOGICAL_PROCESS	2.41846e-06	2.65062e-07	20	3	9996	19224
[OVER]	GO:0042168	heme metabolic process	BIOLOGICAL_PROCESS	2.41846e-06	2.65062e-07	20	3	9996	19224
[OVER]	GO:0033014	tetrapyrrole biosynthetic process	BIOLOGICAL_PROCESS	2.41846e-06	2.65062e-07	20	3	9996	19224
[OVER]	GO:0006839	mitochondrial transport	BIOLOGICAL_PROCESS	2.41846e-06	2.65062e-07	20	3	9996	19224
[OVER]	GO:0046496	nicotinamide nucleotide metabolic process	BIOLOGICAL_PROCESS	2.41846e-06	2.65062e-07	20	3	9996	19224
[OVER]	GO:0051604	protein maturation	BIOLOGICAL_PROCESS	2.41846e-06	2.64351e-07	23	5	9993	19222
[OVER]	GO:1990542	mitochondrial transmembrane transport	BIOLOGICAL_PROCESS	2.41846e-06	2.65062e-07	20	3	9996	19224
[OVER]	GO:0019362	pyridine nucleotide metabolic process	BIOLOGICAL_PROCESS	2.41846e-06	2.65062e-07	20	3	9996	19224
[OVER]	GO:0042773	ATP synthesis coupled electron transport	BIOLOGICAL_PROCESS	2.7501e-06	3.03961e-07	14	0	10002	19227
[OVER]	GO:0034030	ribonucleoside bisphosphate biosynthetic process	BIOLOGICAL_PROCESS	2.7501e-06	3.03961e-07	14	0	10002	19227
[OVER]	GO:0034033	purine nucleoside bisphosphate biosynthetic process	BIOLOGICAL_PROCESS	2.7501e-06	3.03961e-07	14	0	10002	19227
[OVER]	GO:0033866	nucleoside bisphosphate biosynthetic process	BIOLOGICAL_PROCESS	2.7501e-06	3.03961e-07	14	0	10002	19227
[OVER]	GO:0065002	intracellular protein transmembrane transport	BIOLOGICAL_PROCESS	3.26018e-06	3.6185e-07	18	2	9998	19225
[OVER]	GO:0140053	mitochondrial gene expression	BIOLOGICAL_PROCESS	3.26018e-06	3.6185e-07	18	2	9998	19225
[OVER]	GO:0042255	ribosome assembly	BIOLOGICAL_PROCESS	3.62514e-06	4.10203e-07	16	1	10000	19226
[OVER]	GO:0000479	endonucleolytic cleavage of tricistronic rRNA transcript (SSU-rRNA, 5.8S rRNA, LSU-rRNA)	BIOLOGICAL_PROCESS	3.62514e-06	4.10203e-07	16	1	10000	19226
[OVER]	GO:0000478	endonucleolytic cleavage involved in rRNA processing	BIOLOGICAL_PROCESS	3.62514e-06	4.10203e-07	16	1	10000	19226
[OVER]	GO:0044743	protein transmembrane import into intracellular organelle	BIOLOGICAL_PROCESS	3.62514e-06	4.10203e-07	16	1	10000	19226
[OVER]	GO:0009206	purine ribonucleoside triphosphate biosynthetic process	BIOLOGICAL_PROCESS	3.62514e-06	4.10203e-07	16	1	10000	19226
[OVER]	GO:0009086	methionine biosynthetic process	BIOLOGICAL_PROCESS	3.62514e-06	4.10203e-07	16	1	10000	19226
[OVER]	GO:0009145	purine nucleoside triphosphate biosynthetic process	BIOLOGICAL_PROCESS	3.62514e-06	4.10203e-07	16	1	10000	19226
[OVER]	GO:0043085	positive regulation of catalytic activity	BIOLOGICAL_PROCESS	3.62514e-06	4.10203e-07	16	1	10000	19226
[OVER]	GO:0016236	macroautophagy	BIOLOGICAL_PROCESS	3.82661e-06	4.35366e-07	21	4	9995	19223
[OVER]	GO:0009084	glutamine family amino acid biosynthetic process	BIOLOGICAL_PROCESS	3.82661e-06	4.35366e-07	21	4	9995	19223
[OVER]	GO:0051028	mRNA transport	BIOLOGICAL_PROCESS	3.82661e-06	4.35366e-07	21	4	9995	19223
[OVER]	GO:0010646	regulation of cell communication	BIOLOGICAL_PROCESS	3.90473e-06	4.45462e-07	30	11	9986	19216
[OVER]	GO:0062197	cellular response to chemical stress	BIOLOGICAL_PROCESS	4.15162e-06	4.74911e-07	25	7	9991	19220
[OVER]	GO:0009072	aromatic amino acid metabolic process	BIOLOGICAL_PROCESS	4.29725e-06	4.92234e-07	28	9	9988	19218
[OVER]	GO:0009653	anatomical structure morphogenesis	BIOLOGICAL_PROCESS	5.1005e-06	5.85821e-07	26	8	9990	19219
[OVER]	GO:0019318	hexose metabolic process	BIOLOGICAL_PROCESS	5.1005e-06	5.85821e-07	26	8	9990	19219
[OVER]	GO:0032956	regulation of actin cytoskeleton organization	BIOLOGICAL_PROCESS	5.4953e-06	6.37961e-07	22	5	9994	19222
[OVER]	GO:0032984	protein-containing complex disassembly	BIOLOGICAL_PROCESS	5.4953e-06	6.37961e-07	22	5	9994	19222
[OVER]	GO:0032970	regulation of actin filament-based process	BIOLOGICAL_PROCESS	5.4953e-06	6.37961e-07	22	5	9994	19222
[OVER]	GO:0051248	negative regulation of protein metabolic process	BIOLOGICAL_PROCESS	5.4953e-06	6.37961e-07	22	5	9994	19222
[OVER]	GO:0034599	cellular response to oxidative stress	BIOLOGICAL_PROCESS	5.4953e-06	6.37961e-07	22	5	9994	19222
[OVER]	GO:0043254	regulation of protein-containing complex assembly	BIOLOGICAL_PROCESS	5.4953e-06	6.37961e-07	22	5	9994	19222
[OVER]	GO:2000113	negative regulation of cellular macromolecule biosynthetic process	BIOLOGICAL_PROCESS	5.74117e-06	6.76267e-07	19	3	9997	19224
[OVER]	GO:0006626	protein targeting to mitochondrion	BIOLOGICAL_PROCESS	5.74117e-06	6.76267e-07	19	3	9997	19224
[OVER]	GO:0006783	heme biosynthetic process	BIOLOGICAL_PROCESS	5.74117e-06	6.76267e-07	19	3	9997	19224
[OVER]	GO:0043488	regulation of mRNA stability	BIOLOGICAL_PROCESS	5.74117e-06	6.76267e-07	19	3	9997	19224
[OVER]	GO:0043487	regulation of RNA stability	BIOLOGICAL_PROCESS	5.74117e-06	6.76267e-07	19	3	9997	19224
[OVER]	GO:0072655	establishment of protein localization to mitochondrion	BIOLOGICAL_PROCESS	5.74117e-06	6.76267e-07	19	3	9997	19224
[OVER]	GO:0051258	protein polymerization	BIOLOGICAL_PROCESS	5.74117e-06	6.76267e-07	19	3	9997	19224
[OVER]	GO:0010639	negative regulation of organelle organization	BIOLOGICAL_PROCESS	5.74117e-06	6.76267e-07	19	3	9997	19224
[OVER]	GO:0061013	regulation of mRNA catabolic process	BIOLOGICAL_PROCESS	5.74117e-06	6.76267e-07	19	3	9997	19224
[OVER]	GO:0070585	protein localization to mitochondrion	BIOLOGICAL_PROCESS	5.74117e-06	6.76267e-07	19	3	9997	19224
[OVER]	GO:0009308	amine metabolic process	BIOLOGICAL_PROCESS	7.27893e-06	8.6078e-07	23	6	9993	19221
[OVER]	GO:0009069	serine family amino acid metabolic process	BIOLOGICAL_PROCESS	7.27893e-06	8.6078e-07	23	6	9993	19221
[OVER]	GO:0042775	mitochondrial ATP synthesis coupled electron transport	BIOLOGICAL_PROCESS	7.44279e-06	8.88211e-07	13	0	10003	19227
[OVER]	GO:0051336	regulation of hydrolase activity	BIOLOGICAL_PROCESS	7.44279e-06	8.88211e-07	13	0	10003	19227
[OVER]	GO:1901989	positive regulation of cell cycle phase transition	BIOLOGICAL_PROCESS	7.44279e-06	8.88211e-07	13	0	10003	19227
[OVER]	GO:0019646	aerobic electron transport chain	BIOLOGICAL_PROCESS	7.44279e-06	8.88211e-07	13	0	10003	19227
[OVER]	GO:0045931	positive regulation of mitotic cell cycle	BIOLOGICAL_PROCESS	7.44279e-06	8.88211e-07	13	0	10003	19227
[OVER]	GO:0009966	regulation of signal transduction	BIOLOGICAL_PROCESS	7.84457e-06	9.38584e-07	29	11	9987	19216
[OVER]	GO:0006555	methionine metabolic process	BIOLOGICAL_PROCESS	7.92811e-06	9.54707e-07	17	2	9999	19225
[OVER]	GO:0032506	cytokinetic process	BIOLOGICAL_PROCESS	7.92811e-06	9.54707e-07	17	2	9999	19225
[OVER]	GO:0010876	lipid localization	BIOLOGICAL_PROCESS	8.02513e-06	9.68871e-07	27	9	9989	19218
[OVER]	GO:0034249	negative regulation of amide metabolic process	BIOLOGICAL_PROCESS	8.79457e-06	1.074e-06	20	4	9996	19223
[OVER]	GO:0009628	response to abiotic stimulus	BIOLOGICAL_PROCESS	8.79457e-06	1.074e-06	20	4	9996	19223
[OVER]	GO:0006006	glucose metabolic process	BIOLOGICAL_PROCESS	8.79457e-06	1.074e-06	20	4	9996	19223
[OVER]	GO:0071852	fungal-type cell wall organization or biogenesis	BIOLOGICAL_PROCESS	8.79457e-06	1.074e-06	20	4	9996	19223
[OVER]	GO:0006665	sphingolipid metabolic process	BIOLOGICAL_PROCESS	8.91418e-06	1.09136e-06	24	7	9992	19220
[OVER]	GO:0006869	lipid transport	BIOLOGICAL_PROCESS	8.91418e-06	1.09136e-06	24	7	9992	19220
[OVER]	GO:0051983	regulation of chromosome segregation	BIOLOGICAL_PROCESS	9.16329e-06	1.13036e-06	15	1	10001	19226
[OVER]	GO:0061982	meiosis I cell cycle process	BIOLOGICAL_PROCESS	9.16329e-06	1.13036e-06	15	1	10001	19226
[OVER]	GO:0034637	cellular carbohydrate biosynthetic process	BIOLOGICAL_PROCESS	9.16329e-06	1.13036e-06	15	1	10001	19226
[OVER]	GO:0007093	mitotic cell cycle checkpoint signaling	BIOLOGICAL_PROCESS	9.16329e-06	1.13036e-06	15	1	10001	19226
[OVER]	GO:0045930	negative regulation of mitotic cell cycle	BIOLOGICAL_PROCESS	9.16329e-06	1.13036e-06	15	1	10001	19226
[OVER]	GO:1903508	positive regulation of nucleic acid-templated transcription	BIOLOGICAL_PROCESS	9.57445e-06	1.18552e-06	45	27	9971	19200
[OVER]	GO:1902680	positive regulation of RNA biosynthetic process	BIOLOGICAL_PROCESS	9.57445e-06	1.18552e-06	45	27	9971	19200
[OVER]	GO:0045893	positive regulation of DNA-templated transcription	BIOLOGICAL_PROCESS	9.57445e-06	1.18552e-06	45	27	9971	19200
[OVER]	GO:0000460	maturation of 5.8S rRNA	BIOLOGICAL_PROCESS	1.22623e-05	1.52781e-06	21	5	9995	19222
[OVER]	GO:0017148	negative regulation of translation	BIOLOGICAL_PROCESS	1.36904e-05	1.7142e-06	18	3	9998	19224
[OVER]	GO:0006099	tricarboxylic acid cycle	BIOLOGICAL_PROCESS	1.36904e-05	1.7142e-06	18	3	9998	19224
[OVER]	GO:0032879	regulation of localization	BIOLOGICAL_PROCESS	1.55412e-05	1.95076e-06	26	9	9990	19218
[OVER]	GO:0007264	small GTPase mediated signal transduction	BIOLOGICAL_PROCESS	1.59765e-05	2.00786e-06	22	6	9994	19221
[OVER]	GO:0051273	beta-glucan metabolic process	BIOLOGICAL_PROCESS	1.81772e-05	2.28725e-06	25	8	9991	19219
[OVER]	GO:0006760	folic acid-containing compound metabolic process	BIOLOGICAL_PROCESS	1.94762e-05	2.5049e-06	16	2	10000	19225
[OVER]	GO:0042558	pteridine-containing compound metabolic process	BIOLOGICAL_PROCESS	1.94762e-05	2.5049e-06	16	2	10000	19225
[OVER]	GO:0007163	establishment or maintenance of cell polarity	BIOLOGICAL_PROCESS	1.94762e-05	2.5049e-06	16	2	10000	19225
[OVER]	GO:0002098	tRNA wobble uridine modification	BIOLOGICAL_PROCESS	1.94762e-05	2.5049e-06	16	2	10000	19225
[OVER]	GO:0034504	protein localization to nucleus	BIOLOGICAL_PROCESS	1.94762e-05	2.5049e-06	16	2	10000	19225
[OVER]	GO:0051052	regulation of DNA metabolic process	BIOLOGICAL_PROCESS	1.94762e-05	2.5049e-06	16	2	10000	19225
[OVER]	GO:0032543	mitochondrial translation	BIOLOGICAL_PROCESS	1.94762e-05	2.5049e-06	16	2	10000	19225
[OVER]	GO:0015711	organic anion transport	BIOLOGICAL_PROCESS	1.94762e-05	2.48649e-06	23	7	9993	19220
[OVER]	GO:0140013	meiotic nuclear division	BIOLOGICAL_PROCESS	1.94762e-05	2.5049e-06	16	2	10000	19225
[OVER]	GO:0055076	transition metal ion homeostasis	BIOLOGICAL_PROCESS	1.94762e-05	2.48649e-06	23	7	9993	19220
[OVER]	GO:0006383	transcription by RNA polymerase III	BIOLOGICAL_PROCESS	2.00825e-05	2.59529e-06	12	0	10004	19227
[OVER]	GO:0006525	arginine metabolic process	BIOLOGICAL_PROCESS	2.00825e-05	2.59529e-06	12	0	10004	19227
[OVER]	GO:1901992	positive regulation of mitotic cell cycle phase transition	BIOLOGICAL_PROCESS	2.00825e-05	2.59529e-06	12	0	10004	19227
[OVER]	GO:0010499	proteasomal ubiquitin-independent protein catabolic process	BIOLOGICAL_PROCESS	2.00825e-05	2.59529e-06	12	0	10004	19227
[OVER]	GO:0016050	vesicle organization	BIOLOGICAL_PROCESS	2.01542e-05	2.62949e-06	19	4	9997	19223
[OVER]	GO:0042157	lipoprotein metabolic process	BIOLOGICAL_PROCESS	2.01542e-05	2.62949e-06	19	4	9997	19223
[OVER]	GO:0009247	glycolipid biosynthetic process	BIOLOGICAL_PROCESS	2.01542e-05	2.62949e-06	19	4	9997	19223
[OVER]	GO:0051253	negative regulation of RNA metabolic process	BIOLOGICAL_PROCESS	2.01542e-05	2.62949e-06	19	4	9997	19223
[OVER]	GO:0006354	DNA-templated transcription elongation	BIOLOGICAL_PROCESS	2.01542e-05	2.62949e-06	19	4	9997	19223
[OVER]	GO:0044242	cellular lipid catabolic process	BIOLOGICAL_PROCESS	2.01542e-05	2.62949e-06	19	4	9997	19223
[OVER]	GO:0006754	ATP biosynthetic process	BIOLOGICAL_PROCESS	2.35619e-05	3.10322e-06	14	1	10002	19226
[OVER]	GO:0006997	nucleus organization	BIOLOGICAL_PROCESS	2.35619e-05	3.10322e-06	14	1	10002	19226
[OVER]	GO:0015986	proton motive force-driven ATP synthesis	BIOLOGICAL_PROCESS	2.35619e-05	3.10322e-06	14	1	10002	19226
[OVER]	GO:0007017	microtubule-based process	BIOLOGICAL_PROCESS	2.39256e-05	3.15482e-06	32	15	9984	19212
[OVER]	GO:0000466	maturation of 5.8S rRNA from tricistronic rRNA transcript (SSU-rRNA, 5.8S rRNA, LSU-rRNA)	BIOLOGICAL_PROCESS	2.7326e-05	3.62854e-06	20	5	9996	19222
[OVER]	GO:0048284	organelle fusion	BIOLOGICAL_PROCESS	2.7326e-05	3.62854e-06	20	5	9996	19222
[OVER]	GO:0006220	pyrimidine nucleotide metabolic process	BIOLOGICAL_PROCESS	2.7326e-05	3.62854e-06	20	5	9996	19222
[OVER]	GO:0006221	pyrimidine nucleotide biosynthetic process	BIOLOGICAL_PROCESS	2.7326e-05	3.62854e-06	20	5	9996	19222
[OVER]	GO:0048869	cellular developmental process	BIOLOGICAL_PROCESS	2.99427e-05	3.98989e-06	25	9	9991	19218
[OVER]	GO:0016570	histone modification	BIOLOGICAL_PROCESS	2.99427e-05	3.98723e-06	26	10	9990	19217
[OVER]	GO:0006310	DNA recombination	BIOLOGICAL_PROCESS	2.99427e-05	3.98989e-06	25	9	9991	19218
[OVER]	GO:0002183	cytoplasmic translational initiation	BIOLOGICAL_PROCESS	3.21529e-05	4.31423e-06	17	3	9999	19224
[OVER]	GO:0015748	organophosphate ester transport	BIOLOGICAL_PROCESS	3.21529e-05	4.31423e-06	17	3	9999	19224
[OVER]	GO:0009082	branched-chain amino acid biosynthetic process	BIOLOGICAL_PROCESS	3.44391e-05	4.64227e-06	21	6	9995	19221
[OVER]	GO:0008202	steroid metabolic process	BIOLOGICAL_PROCESS	3.97808e-05	5.36848e-06	28	12	9988	19215
[OVER]	GO:0001510	RNA methylation	BIOLOGICAL_PROCESS	4.14976e-05	5.61299e-06	22	7	9994	19220
[OVER]	GO:0006497	protein lipidation	BIOLOGICAL_PROCESS	4.683e-05	6.38492e-06	18	4	9998	19223
[OVER]	GO:0031399	regulation of protein modification process	BIOLOGICAL_PROCESS	4.683e-05	6.38492e-06	18	4	9998	19223
[OVER]	GO:1903507	negative regulation of nucleic acid-templated transcription	BIOLOGICAL_PROCESS	4.683e-05	6.38492e-06	18	4	9998	19223
[OVER]	GO:0042158	lipoprotein biosynthetic process	BIOLOGICAL_PROCESS	4.683e-05	6.38492e-06	18	4	9998	19223
[OVER]	GO:1902679	negative regulation of RNA biosynthetic process	BIOLOGICAL_PROCESS	4.683e-05	6.38492e-06	18	4	9998	19223
[OVER]	GO:0045892	negative regulation of DNA-templated transcription	BIOLOGICAL_PROCESS	4.683e-05	6.38492e-06	18	4	9998	19223
[OVER]	GO:0000288	nuclear-transcribed mRNA catabolic process, deadenylation-dependent decay	BIOLOGICAL_PROCESS	4.74215e-05	6.53154e-06	15	2	10001	19225
[OVER]	GO:0070972	protein localization to endoplasmic reticulum	BIOLOGICAL_PROCESS	4.74215e-05	6.53154e-06	15	2	10001	19225
[OVER]	GO:0016482	cytosolic transport	BIOLOGICAL_PROCESS	4.74215e-05	6.53154e-06	15	2	10001	19225
[OVER]	GO:0044089	positive regulation of cellular component biogenesis	BIOLOGICAL_PROCESS	4.74215e-05	6.53154e-06	15	2	10001	19225
[OVER]	GO:1901701	cellular response to oxygen-containing compound	BIOLOGICAL_PROCESS	4.74215e-05	6.53154e-06	15	2	10001	19225
[OVER]	GO:0070646	protein modification by small protein removal	BIOLOGICAL_PROCESS	4.74215e-05	6.53154e-06	15	2	10001	19225
[OVER]	GO:0006066	alcohol metabolic process	BIOLOGICAL_PROCESS	5.07147e-05	6.99297e-06	33	17	9983	19210
[OVER]	GO:0044839	cell cycle G2/M phase transition	BIOLOGICAL_PROCESS	5.45032e-05	7.58276e-06	11	0	10005	19227
[OVER]	GO:0009250	glucan biosynthetic process	BIOLOGICAL_PROCESS	5.45032e-05	7.58276e-06	11	0	10005	19227
[OVER]	GO:0016226	iron-sulfur cluster assembly	BIOLOGICAL_PROCESS	5.45032e-05	7.58276e-06	11	0	10005	19227
[OVER]	GO:0007031	peroxisome organization	BIOLOGICAL_PROCESS	5.45032e-05	7.58276e-06	11	0	10005	19227
[OVER]	GO:0031163	metallo-sulfur cluster assembly	BIOLOGICAL_PROCESS	5.45032e-05	7.58276e-06	11	0	10005	19227
[OVER]	GO:0033692	cellular polysaccharide biosynthetic process	BIOLOGICAL_PROCESS	5.45032e-05	7.58276e-06	11	0	10005	19227
[OVER]	GO:0009251	glucan catabolic process	BIOLOGICAL_PROCESS	5.91318e-05	8.23585e-06	24	9	9992	19218
[OVER]	GO:0016125	sterol metabolic process	BIOLOGICAL_PROCESS	5.96957e-05	8.32362e-06	25	10	9991	19217
[OVER]	GO:0006612	protein targeting to membrane	BIOLOGICAL_PROCESS	5.97816e-05	8.48346e-06	13	1	10003	19226
[OVER]	GO:0006730	one-carbon metabolic process	BIOLOGICAL_PROCESS	5.97816e-05	8.48346e-06	13	1	10003	19226
[OVER]	GO:1902969	mitotic DNA replication	BIOLOGICAL_PROCESS	5.97816e-05	8.48346e-06	13	1	10003	19226
[OVER]	GO:0033045	regulation of sister chromatid segregation	BIOLOGICAL_PROCESS	5.97816e-05	8.48346e-06	13	1	10003	19226
[OVER]	GO:0022616	DNA strand elongation	BIOLOGICAL_PROCESS	5.97816e-05	8.48346e-06	13	1	10003	19226
[OVER]	GO:0051304	chromosome separation	BIOLOGICAL_PROCESS	5.97816e-05	8.48346e-06	13	1	10003	19226
[OVER]	GO:0007127	meiosis I	BIOLOGICAL_PROCESS	5.97816e-05	8.48346e-06	13	1	10003	19226
[OVER]	GO:1901991	negative regulation of mitotic cell cycle phase transition	BIOLOGICAL_PROCESS	5.97816e-05	8.48346e-06	13	1	10003	19226
[OVER]	GO:0006271	DNA strand elongation involved in DNA replication	BIOLOGICAL_PROCESS	5.97816e-05	8.48346e-06	13	1	10003	19226
[OVER]	GO:0006897	endocytosis	BIOLOGICAL_PROCESS	5.99864e-05	8.54035e-06	19	5	9997	19222
[OVER]	GO:0006302	double-strand break repair	BIOLOGICAL_PROCESS	5.99864e-05	8.54035e-06	19	5	9997	19222
[OVER]	GO:0006661	phosphatidylinositol biosynthetic process	BIOLOGICAL_PROCESS	6.1331e-05	8.74125e-06	23	8	9993	19219
[OVER]	GO:0050779	RNA destabilization	BIOLOGICAL_PROCESS	7.4294e-05	1.07726e-05	16	3	10000	19224
[OVER]	GO:0031503	protein-containing complex localization	BIOLOGICAL_PROCESS	7.4294e-05	1.07726e-05	16	3	10000	19224
[OVER]	GO:0072525	pyridine-containing compound biosynthetic process	BIOLOGICAL_PROCESS	7.4294e-05	1.07726e-05	16	3	10000	19224
[OVER]	GO:1902903	regulation of supramolecular fiber organization	BIOLOGICAL_PROCESS	7.4294e-05	1.07726e-05	16	3	10000	19224
[OVER]	GO:0060341	regulation of cellular localization	BIOLOGICAL_PROCESS	7.4294e-05	1.07726e-05	16	3	10000	19224
[OVER]	GO:0040029	epigenetic regulation of gene expression	BIOLOGICAL_PROCESS	7.4294e-05	1.07726e-05	16	3	10000	19224
[OVER]	GO:0007033	vacuole organization	BIOLOGICAL_PROCESS	7.4294e-05	1.07726e-05	16	3	10000	19224
[OVER]	GO:0051338	regulation of transferase activity	BIOLOGICAL_PROCESS	7.4294e-05	1.07726e-05	16	3	10000	19224
[OVER]	GO:0045814	negative regulation of gene expression, epigenetic	BIOLOGICAL_PROCESS	7.4294e-05	1.07726e-05	16	3	10000	19224
[OVER]	GO:0061014	positive regulation of mRNA catabolic process	BIOLOGICAL_PROCESS	7.4294e-05	1.07726e-05	16	3	10000	19224
[OVER]	GO:1903313	positive regulation of mRNA metabolic process	BIOLOGICAL_PROCESS	7.4294e-05	1.07726e-05	16	3	10000	19224
[OVER]	GO:0061157	mRNA destabilization	BIOLOGICAL_PROCESS	7.4294e-05	1.07726e-05	16	3	10000	19224
[OVER]	GO:0006270	DNA replication initiation	BIOLOGICAL_PROCESS	7.4294e-05	1.07726e-05	16	3	10000	19224
[OVER]	GO:0009081	branched-chain amino acid metabolic process	BIOLOGICAL_PROCESS	8.30099e-05	1.20749e-05	26	11	9990	19216
[OVER]	GO:0006505	GPI anchor metabolic process	BIOLOGICAL_PROCESS	0.0001054	1.53643e-05	17	4	9999	19223
[OVER]	GO:0006541	glutamine metabolic process	BIOLOGICAL_PROCESS	0.000115049	1.69132e-05	14	2	10002	19225
[OVER]	GO:0044786	cell cycle DNA replication	BIOLOGICAL_PROCESS	0.000115049	1.69132e-05	14	2	10002	19225
[OVER]	GO:0006890	retrograde vesicle-mediated transport, Golgi to endoplasmic reticulum	BIOLOGICAL_PROCESS	0.000115049	1.69132e-05	14	2	10002	19225
[OVER]	GO:0033260	nuclear DNA replication	BIOLOGICAL_PROCESS	0.000115049	1.69132e-05	14	2	10002	19225
[OVER]	GO:0000154	rRNA modification	BIOLOGICAL_PROCESS	0.000115049	1.69132e-05	14	2	10002	19225
[OVER]	GO:0030154	cell differentiation	BIOLOGICAL_PROCESS	0.000119266	1.76253e-05	22	8	9994	19219
[OVER]	GO:0140352	export from cell	BIOLOGICAL_PROCESS	0.000119266	1.76253e-05	22	8	9994	19219
[OVER]	GO:0045786	negative regulation of cell cycle	BIOLOGICAL_PROCESS	0.000119266	1.76253e-05	22	8	9994	19219
[OVER]	GO:0006405	RNA export from nucleus	BIOLOGICAL_PROCESS	0.000134127	1.99045e-05	18	5	9998	19222
[OVER]	GO:0009112	nucleobase metabolic process	BIOLOGICAL_PROCESS	0.000134127	1.99045e-05	18	5	9998	19222
[OVER]	GO:1901606	alpha-amino acid catabolic process	BIOLOGICAL_PROCESS	0.000137191	2.04016e-05	26	12	9990	19215
[OVER]	GO:0010948	negative regulation of cell cycle process	BIOLOGICAL_PROCESS	0.000137387	2.0452e-05	21	7	9995	19220
[OVER]	GO:0006526	arginine biosynthetic process	BIOLOGICAL_PROCESS	0.000147136	2.21534e-05	10	0	10006	19227
[OVER]	GO:1902749	regulation of cell cycle G2/M phase transition	BIOLOGICAL_PROCESS	0.000147136	2.21534e-05	10	0	10006	19227
[OVER]	GO:0007062	sister chromatid cohesion	BIOLOGICAL_PROCESS	0.000147136	2.21534e-05	10	0	10006	19227
[OVER]	GO:0051347	positive regulation of transferase activity	BIOLOGICAL_PROCESS	0.000147136	2.21534e-05	10	0	10006	19227
[OVER]	GO:0000086	G2/M transition of mitotic cell cycle	BIOLOGICAL_PROCESS	0.000147136	2.21534e-05	10	0	10006	19227
[OVER]	GO:1902410	mitotic cytokinetic process	BIOLOGICAL_PROCESS	0.000150359	2.30803e-05	12	1	10004	19226
[OVER]	GO:0030071	regulation of mitotic metaphase/anaphase transition	BIOLOGICAL_PROCESS	0.000150359	2.30803e-05	12	1	10004	19226
[OVER]	GO:0000271	polysaccharide biosynthetic process	BIOLOGICAL_PROCESS	0.000150359	2.30803e-05	12	1	10004	19226
[OVER]	GO:0006534	cysteine metabolic process	BIOLOGICAL_PROCESS	0.000150359	2.30803e-05	12	1	10004	19226
[OVER]	GO:0044784	metaphase/anaphase transition of cell cycle	BIOLOGICAL_PROCESS	0.000150359	2.30803e-05	12	1	10004	19226
[OVER]	GO:0016579	protein deubiquitination	BIOLOGICAL_PROCESS	0.000150359	2.30803e-05	12	1	10004	19226
[OVER]	GO:0007091	metaphase/anaphase transition of mitotic cell cycle	BIOLOGICAL_PROCESS	0.000150359	2.30803e-05	12	1	10004	19226
[OVER]	GO:0018208	peptidyl-proline modification	BIOLOGICAL_PROCESS	0.000150359	2.30803e-05	12	1	10004	19226
[OVER]	GO:1902099	regulation of metaphase/anaphase transition of cell cycle	BIOLOGICAL_PROCESS	0.000150359	2.30803e-05	12	1	10004	19226
[OVER]	GO:0019674	NAD metabolic process	BIOLOGICAL_PROCESS	0.000150359	2.30803e-05	12	1	10004	19226
[OVER]	GO:0019363	pyridine nucleotide biosynthetic process	BIOLOGICAL_PROCESS	0.000150359	2.30803e-05	12	1	10004	19226
[OVER]	GO:0019359	nicotinamide nucleotide biosynthetic process	BIOLOGICAL_PROCESS	0.000150359	2.30803e-05	12	1	10004	19226
[OVER]	GO:0055067	monovalent inorganic cation homeostasis	BIOLOGICAL_PROCESS	0.000150359	2.30803e-05	12	1	10004	19226
[OVER]	GO:0043650	dicarboxylic acid biosynthetic process	BIOLOGICAL_PROCESS	0.000171295	2.66648e-05	15	3	10001	19224
[OVER]	GO:0031507	heterochromatin formation	BIOLOGICAL_PROCESS	0.000171295	2.66648e-05	15	3	10001	19224
[OVER]	GO:0098661	inorganic anion transmembrane transport	BIOLOGICAL_PROCESS	0.000171295	2.66648e-05	15	3	10001	19224
[OVER]	GO:0009073	aromatic amino acid family biosynthetic process	BIOLOGICAL_PROCESS	0.000171295	2.66648e-05	15	3	10001	19224
[OVER]	GO:0110053	regulation of actin filament organization	BIOLOGICAL_PROCESS	0.000171295	2.66648e-05	15	3	10001	19224
[OVER]	GO:0009605	response to external stimulus	BIOLOGICAL_PROCESS	0.000171295	2.66648e-05	15	3	10001	19224
[OVER]	GO:0070828	heterochromatin organization	BIOLOGICAL_PROCESS	0.000171295	2.66648e-05	15	3	10001	19224
[OVER]	GO:0032392	DNA geometric change	BIOLOGICAL_PROCESS	0.000171295	2.66648e-05	15	3	10001	19224
[OVER]	GO:0042886	amide transport	BIOLOGICAL_PROCESS	0.000230189	3.59392e-05	21	8	9995	19219
[OVER]	GO:0044247	cellular polysaccharide catabolic process	BIOLOGICAL_PROCESS	0.000230189	3.59392e-05	21	8	9995	19219
[OVER]	GO:0006506	GPI anchor biosynthetic process	BIOLOGICAL_PROCESS	0.000233765	3.6606e-05	16	4	10000	19223
[OVER]	GO:0071103	DNA conformation change	BIOLOGICAL_PROCESS	0.000233765	3.6606e-05	16	4	10000	19223
[OVER]	GO:0006368	transcription elongation by RNA polymerase II promoter	BIOLOGICAL_PROCESS	0.000233765	3.6606e-05	16	4	10000	19223
[OVER]	GO:0043934	sporulation	BIOLOGICAL_PROCESS	0.000253237	3.97726e-05	20	7	9996	19220
[OVER]	GO:0098754	detoxification	BIOLOGICAL_PROCESS	0.000253626	3.9912e-05	25	12	9991	19215
[OVER]	GO:0009636	response to toxic substance	BIOLOGICAL_PROCESS	0.000253626	3.9912e-05	25	12	9991	19215
[OVER]	GO:0006606	protein import into nucleus	BIOLOGICAL_PROCESS	0.000273188	4.3455e-05	13	2	10003	19225
[OVER]	GO:0031667	response to nutrient levels	BIOLOGICAL_PROCESS	0.000273188	4.3455e-05	13	2	10003	19225
[OVER]	GO:0006470	protein dephosphorylation	BIOLOGICAL_PROCESS	0.000273188	4.3455e-05	13	2	10003	19225
[OVER]	GO:0030041	actin filament polymerization	BIOLOGICAL_PROCESS	0.000273188	4.3455e-05	13	2	10003	19225
[OVER]	GO:0044843	cell cycle G1/S phase transition	BIOLOGICAL_PROCESS	0.000273188	4.3455e-05	13	2	10003	19225
[OVER]	GO:0031505	fungal-type cell wall organization	BIOLOGICAL_PROCESS	0.000273188	4.3455e-05	13	2	10003	19225
[OVER]	GO:0000082	G1/S transition of mitotic cell cycle	BIOLOGICAL_PROCESS	0.000273188	4.3455e-05	13	2	10003	19225
[OVER]	GO:0009991	response to extracellular stimulus	BIOLOGICAL_PROCESS	0.000273188	4.3455e-05	13	2	10003	19225
[OVER]	GO:0032271	regulation of protein polymerization	BIOLOGICAL_PROCESS	0.000273188	4.3455e-05	13	2	10003	19225
[OVER]	GO:0006637	acyl-CoA metabolic process	BIOLOGICAL_PROCESS	0.000287128	4.58944e-05	17	5	9999	19222
[OVER]	GO:0006576	biogenic amine metabolic process	BIOLOGICAL_PROCESS	0.000287128	4.58944e-05	17	5	9999	19222
[OVER]	GO:0035383	thioester metabolic process	BIOLOGICAL_PROCESS	0.000287128	4.58944e-05	17	5	9999	19222
[OVER]	GO:0006090	pyruvate metabolic process	BIOLOGICAL_PROCESS	0.000327359	5.23755e-05	23	10	9993	19217
[OVER]	GO:0045944	positive regulation of transcription by RNA polymerase II	BIOLOGICAL_PROCESS	0.000339099	5.43061e-05	36	24	9980	19203
[OVER]	GO:0044837	actomyosin contractile ring organization	BIOLOGICAL_PROCESS	0.000385455	6.2445e-05	11	1	10005	19226
[OVER]	GO:0072666	establishment of protein localization to vacuole	BIOLOGICAL_PROCESS	0.000385455	6.2445e-05	11	1	10005	19226
[OVER]	GO:0051306	mitotic sister chromatid separation	BIOLOGICAL_PROCESS	0.000385455	6.2445e-05	11	1	10005	19226
[OVER]	GO:0022603	regulation of anatomical structure morphogenesis	BIOLOGICAL_PROCESS	0.000385455	6.2445e-05	11	1	10005	19226
[OVER]	GO:0006275	regulation of DNA replication	BIOLOGICAL_PROCESS	0.000385455	6.2445e-05	11	1	10005	19226
[OVER]	GO:0006081	cellular aldehyde metabolic process	BIOLOGICAL_PROCESS	0.000385455	6.2445e-05	11	1	10005	19226
[OVER]	GO:0031032	actomyosin structure organization	BIOLOGICAL_PROCESS	0.000385455	6.2445e-05	11	1	10005	19226
[OVER]	GO:0006623	protein targeting to vacuole	BIOLOGICAL_PROCESS	0.000392228	6.4718e-05	9	0	10007	19227
[OVER]	GO:0042325	regulation of phosphorylation	BIOLOGICAL_PROCESS	0.000392228	6.53612e-05	14	3	10002	19224
[OVER]	GO:0090066	regulation of anatomical structure size	BIOLOGICAL_PROCESS	0.000392228	6.53612e-05	14	3	10002	19224
[OVER]	GO:0006547	histidine metabolic process	BIOLOGICAL_PROCESS	0.000392228	6.4718e-05	9	0	10007	19227
[OVER]	GO:0032880	regulation of protein localization	BIOLOGICAL_PROCESS	0.000392228	6.53612e-05	14	3	10002	19224
[OVER]	GO:0048308	organelle inheritance	BIOLOGICAL_PROCESS	0.000392228	6.4718e-05	9	0	10007	19227
[OVER]	GO:0009218	pyrimidine ribonucleotide metabolic process	BIOLOGICAL_PROCESS	0.000392228	6.53612e-05	14	3	10002	19224
[OVER]	GO:0010389	regulation of G2/M transition of mitotic cell cycle	BIOLOGICAL_PROCESS	0.000392228	6.4718e-05	9	0	10007	19227
[OVER]	GO:0006817	phosphate ion transport	BIOLOGICAL_PROCESS	0.000392228	6.4718e-05	9	0	10007	19227
[OVER]	GO:0006885	regulation of pH	BIOLOGICAL_PROCESS	0.000392228	6.4718e-05	9	0	10007	19227
[OVER]	GO:0001932	regulation of protein phosphorylation	BIOLOGICAL_PROCESS	0.000392228	6.53612e-05	14	3	10002	19224
[OVER]	GO:0010035	response to inorganic substance	BIOLOGICAL_PROCESS	0.000392228	6.53612e-05	14	3	10002	19224
[OVER]	GO:0051170	import into nucleus	BIOLOGICAL_PROCESS	0.000392228	6.53612e-05	14	3	10002	19224
[OVER]	GO:0008154	actin polymerization or depolymerization	BIOLOGICAL_PROCESS	0.000392228	6.53612e-05	14	3	10002	19224
[OVER]	GO:0010562	positive regulation of phosphorus metabolic process	BIOLOGICAL_PROCESS	0.000392228	6.4718e-05	9	0	10007	19227
[OVER]	GO:0032508	DNA duplex unwinding	BIOLOGICAL_PROCESS	0.000392228	6.53612e-05	14	3	10002	19224
[OVER]	GO:0045937	positive regulation of phosphate metabolic process	BIOLOGICAL_PROCESS	0.000392228	6.4718e-05	9	0	10007	19227
[OVER]	GO:0043248	proteasome assembly	BIOLOGICAL_PROCESS	0.000392228	6.53612e-05	14	3	10002	19224
[OVER]	GO:0032535	regulation of cellular component size	BIOLOGICAL_PROCESS	0.000392228	6.53612e-05	14	3	10002	19224
[OVER]	GO:0043094	cellular metabolic compound salvage	BIOLOGICAL_PROCESS	0.000392228	6.53612e-05	14	3	10002	19224
[OVER]	GO:0030243	cellulose metabolic process	BIOLOGICAL_PROCESS	0.000441488	7.36382e-05	20	8	9996	19219
[OVER]	GO:0019953	sexual reproduction	BIOLOGICAL_PROCESS	0.000472428	7.89449e-05	19	7	9997	19220
[OVER]	GO:1902531	regulation of intracellular signal transduction	BIOLOGICAL_PROCESS	0.000504182	8.44237e-05	23	11	9993	19216
[OVER]	GO:0006631	fatty acid metabolic process	BIOLOGICAL_PROCESS	0.000504182	8.44849e-05	37	26	9979	19201
[OVER]	GO:0042430	indole-containing compound metabolic process	BIOLOGICAL_PROCESS	0.000511944	8.62605e-05	15	4	10001	19223
[OVER]	GO:0006568	tryptophan metabolic process	BIOLOGICAL_PROCESS	0.000511944	8.62605e-05	15	4	10001	19223
[OVER]	GO:0006586	indolalkylamine metabolic process	BIOLOGICAL_PROCESS	0.000511944	8.62605e-05	15	4	10001	19223
[OVER]	GO:0046040	IMP metabolic process	BIOLOGICAL_PROCESS	0.000511944	8.62605e-05	15	4	10001	19223
[OVER]	GO:0007018	microtubule-based movement	BIOLOGICAL_PROCESS	0.000568882	9.6382e-05	18	6	9998	19221
[OVER]	GO:0051174	regulation of phosphorus metabolic process	BIOLOGICAL_PROCESS	0.000568882	9.6382e-05	18	6	9998	19221
[OVER]	GO:0019220	regulation of phosphate metabolic process	BIOLOGICAL_PROCESS	0.000568882	9.6382e-05	18	6	9998	19221
[OVER]	GO:0034976	response to endoplasmic reticulum stress	BIOLOGICAL_PROCESS	0.000568882	9.6382e-05	18	6	9998	19221
[OVER]	GO:1901988	negative regulation of cell cycle phase transition	BIOLOGICAL_PROCESS	0.000616141	0.000104579	16	5	10000	19222
[OVER]	GO:0000075	cell cycle checkpoint signaling	BIOLOGICAL_PROCESS	0.000616141	0.000104579	16	5	10000	19222
[OVER]	GO:0072665	protein localization to vacuole	BIOLOGICAL_PROCESS	0.000644344	0.000110661	12	2	10004	19225
[OVER]	GO:0030833	regulation of actin filament polymerization	BIOLOGICAL_PROCESS	0.000644344	0.000110661	12	2	10004	19225
[OVER]	GO:0030832	regulation of actin filament length	BIOLOGICAL_PROCESS	0.000644344	0.000110661	12	2	10004	19225
[OVER]	GO:0008064	regulation of actin polymerization or depolymerization	BIOLOGICAL_PROCESS	0.000644344	0.000110661	12	2	10004	19225
[OVER]	GO:0072329	monocarboxylic acid catabolic process	BIOLOGICAL_PROCESS	0.000644344	0.000110661	12	2	10004	19225
[OVER]	GO:0007029	endoplasmic reticulum organization	BIOLOGICAL_PROCESS	0.000644344	0.000110661	12	2	10004	19225
[OVER]	GO:0006144	purine nucleobase metabolic process	BIOLOGICAL_PROCESS	0.000644344	0.000110661	12	2	10004	19225
[OVER]	GO:0051783	regulation of nuclear division	BIOLOGICAL_PROCESS	0.000644344	0.000110661	12	2	10004	19225
[OVER]	GO:0006360	transcription by RNA polymerase I	BIOLOGICAL_PROCESS	0.000644344	0.000110661	12	2	10004	19225
[OVER]	GO:0016126	sterol biosynthetic process	BIOLOGICAL_PROCESS	0.0007327	0.000126175	21	9	9995	19218
[OVER]	GO:0009132	nucleoside diphosphate metabolic process	BIOLOGICAL_PROCESS	0.0007327	0.000126175	21	9	9995	19218
[OVER]	GO:0030245	cellulose catabolic process	BIOLOGICAL_PROCESS	0.000874115	0.000150798	19	8	9997	19219
[OVER]	GO:0051275	beta-glucan catabolic process	BIOLOGICAL_PROCESS	0.000874115	0.000150798	19	8	9997	19219
[OVER]	GO:0001732	formation of cytoplasmic translation initiation complex	BIOLOGICAL_PROCESS	0.00090239	0.00015847	13	3	10003	19224
[OVER]	GO:0006406	mRNA export from nucleus	BIOLOGICAL_PROCESS	0.00090239	0.00015847	13	3	10003	19224
[OVER]	GO:0030162	regulation of proteolysis	BIOLOGICAL_PROCESS	0.00090239	0.00015847	13	3	10003	19224
[OVER]	GO:0000902	cell morphogenesis	BIOLOGICAL_PROCESS	0.00090239	0.00015847	13	3	10003	19224
[OVER]	GO:0016485	protein processing	BIOLOGICAL_PROCESS	0.00090239	0.00015847	13	3	10003	19224
[OVER]	GO:0009220	pyrimidine ribonucleotide biosynthetic process	BIOLOGICAL_PROCESS	0.00090239	0.00015847	13	3	10003	19224
[OVER]	GO:0042546	cell wall biogenesis	BIOLOGICAL_PROCESS	0.00090239	0.00015847	13	3	10003	19224
[OVER]	GO:0009070	serine family amino acid biosynthetic process	BIOLOGICAL_PROCESS	0.00090239	0.00015847	13	3	10003	19224
[OVER]	GO:0044092	negative regulation of molecular function	BIOLOGICAL_PROCESS	0.00090239	0.00015847	13	3	10003	19224
[OVER]	GO:0010628	positive regulation of gene expression	BIOLOGICAL_PROCESS	0.00090239	0.00015847	13	3	10003	19224
[OVER]	GO:0000054	ribosomal subunit export from nucleus	BIOLOGICAL_PROCESS	0.00090239	0.00015847	13	3	10003	19224
[OVER]	GO:0033750	ribosome localization	BIOLOGICAL_PROCESS	0.00090239	0.00015847	13	3	10003	19224
[OVER]	GO:0006189	'de novo' IMP biosynthetic process	BIOLOGICAL_PROCESS	0.00090239	0.00015847	13	3	10003	19224
[OVER]	GO:0070588	calcium ion transmembrane transport	BIOLOGICAL_PROCESS	0.00090239	0.00015847	13	3	10003	19224
[OVER]	GO:0071985	multivesicular body sorting pathway	BIOLOGICAL_PROCESS	0.00090239	0.00015847	13	3	10003	19224
[OVER]	GO:0006694	steroid biosynthetic process	BIOLOGICAL_PROCESS	0.000923609	0.000162763	22	11	9994	19216
[OVER]	GO:0042401	biogenic amine biosynthetic process	BIOLOGICAL_PROCESS	0.000936108	0.00016786	10	1	10006	19226
[OVER]	GO:0036260	RNA capping	BIOLOGICAL_PROCESS	0.000936108	0.00016786	10	1	10006	19226
[OVER]	GO:0031401	positive regulation of protein modification process	BIOLOGICAL_PROCESS	0.000936108	0.00016786	10	1	10006	19226
[OVER]	GO:0030004	cellular monovalent inorganic cation homeostasis	BIOLOGICAL_PROCESS	0.000936108	0.00016786	10	1	10006	19226
[OVER]	GO:0090329	regulation of DNA-templated DNA replication	BIOLOGICAL_PROCESS	0.000936108	0.00016786	10	1	10006	19226
[OVER]	GO:0009309	amine biosynthetic process	BIOLOGICAL_PROCESS	0.000936108	0.00016786	10	1	10006	19226
[OVER]	GO:0046653	tetrahydrofolate metabolic process	BIOLOGICAL_PROCESS	0.000936108	0.00016786	10	1	10006	19226
[OVER]	GO:0051302	regulation of cell division	BIOLOGICAL_PROCESS	0.000936108	0.00016786	10	1	10006	19226
[OVER]	GO:0022604	regulation of cell morphogenesis	BIOLOGICAL_PROCESS	0.000936108	0.00016786	10	1	10006	19226
[OVER]	GO:0000027	ribosomal large subunit assembly	BIOLOGICAL_PROCESS	0.000936108	0.00016786	10	1	10006	19226
[OVER]	GO:0042327	positive regulation of phosphorylation	BIOLOGICAL_PROCESS	0.00102255	0.000189052	8	0	10008	19227
[OVER]	GO:0042435	indole-containing compound biosynthetic process	BIOLOGICAL_PROCESS	0.00102255	0.000189052	8	0	10008	19227
[OVER]	GO:1901698	response to nitrogen compound	BIOLOGICAL_PROCESS	0.00102255	0.000184024	17	6	9999	19221
[OVER]	GO:0046219	indolalkylamine biosynthetic process	BIOLOGICAL_PROCESS	0.00102255	0.000189052	8	0	10008	19227
[OVER]	GO:0035384	thioester biosynthetic process	BIOLOGICAL_PROCESS	0.00102255	0.000189052	8	0	10008	19227
[OVER]	GO:0006862	nucleotide transport	BIOLOGICAL_PROCESS	0.00102255	0.000189052	8	0	10008	19227
[OVER]	GO:0016237	lysosomal microautophagy	BIOLOGICAL_PROCESS	0.00102255	0.000189052	8	0	10008	19227
[OVER]	GO:0001934	positive regulation of protein phosphorylation	BIOLOGICAL_PROCESS	0.00102255	0.000189052	8	0	10008	19227
[OVER]	GO:0030641	regulation of cellular pH	BIOLOGICAL_PROCESS	0.00102255	0.000189052	8	0	10008	19227
[OVER]	GO:0009119	ribonucleoside metabolic process	BIOLOGICAL_PROCESS	0.00102255	0.000189052	8	0	10008	19227
[OVER]	GO:0034614	cellular response to reactive oxygen species	BIOLOGICAL_PROCESS	0.00102255	0.000189052	8	0	10008	19227
[OVER]	GO:0071616	acyl-CoA biosynthetic process	BIOLOGICAL_PROCESS	0.00102255	0.000189052	8	0	10008	19227
[OVER]	GO:0045185	maintenance of protein location	BIOLOGICAL_PROCESS	0.00102255	0.000189052	8	0	10008	19227
[OVER]	GO:0046434	organophosphate catabolic process	BIOLOGICAL_PROCESS	0.00102255	0.000184024	17	6	9999	19221
[OVER]	GO:1901700	response to oxygen-containing compound	BIOLOGICAL_PROCESS	0.00102255	0.000184024	17	6	9999	19221
[OVER]	GO:0051646	mitochondrion localization	BIOLOGICAL_PROCESS	0.00102255	0.000189052	8	0	10008	19227
[OVER]	GO:0032507	maintenance of protein location in cell	BIOLOGICAL_PROCESS	0.00102255	0.000189052	8	0	10008	19227
[OVER]	GO:0015936	coenzyme A metabolic process	BIOLOGICAL_PROCESS	0.00102255	0.000189052	8	0	10008	19227
[OVER]	GO:0000162	tryptophan biosynthetic process	BIOLOGICAL_PROCESS	0.00102255	0.000189052	8	0	10008	19227
[OVER]	GO:0008608	attachment of spindle microtubules to kinetochore	BIOLOGICAL_PROCESS	0.00102255	0.000189052	8	0	10008	19227
[OVER]	GO:0051453	regulation of intracellular pH	BIOLOGICAL_PROCESS	0.00102255	0.000189052	8	0	10008	19227
[OVER]	GO:0006085	acetyl-CoA biosynthetic process	BIOLOGICAL_PROCESS	0.00102255	0.000189052	8	0	10008	19227
[OVER]	GO:0009225	nucleotide-sugar metabolic process	BIOLOGICAL_PROCESS	0.00108157	0.000200799	14	4	10002	19223
[OVER]	GO:0071310	cellular response to organic substance	BIOLOGICAL_PROCESS	0.00108157	0.000200799	14	4	10002	19223
[OVER]	GO:0006188	IMP biosynthetic process	BIOLOGICAL_PROCESS	0.00108157	0.000200799	14	4	10002	19223
[OVER]	GO:0006084	acetyl-CoA metabolic process	BIOLOGICAL_PROCESS	0.00108157	0.000200799	14	4	10002	19223
[OVER]	GO:0009311	oligosaccharide metabolic process	BIOLOGICAL_PROCESS	0.00126279	0.000235224	15	5	10001	19222
[OVER]	GO:0043628	regulatory ncRNA 3'-end processing	BIOLOGICAL_PROCESS	0.00148155	0.000278951	11	2	10005	19225
[OVER]	GO:0006749	glutathione metabolic process	BIOLOGICAL_PROCESS	0.00148155	0.000278951	11	2	10005	19225
[OVER]	GO:0006415	translational termination	BIOLOGICAL_PROCESS	0.00148155	0.000278951	11	2	10005	19225
[OVER]	GO:0042147	retrograde transport, endosome to Golgi	BIOLOGICAL_PROCESS	0.00148155	0.000278951	11	2	10005	19225
[OVER]	GO:0072599	establishment of protein localization to endoplasmic reticulum	BIOLOGICAL_PROCESS	0.00148155	0.000278951	11	2	10005	19225
[OVER]	GO:0045047	protein targeting to ER	BIOLOGICAL_PROCESS	0.00148155	0.000278951	11	2	10005	19225
[OVER]	GO:0034314	Arp2/3 complex-mediated actin nucleation	BIOLOGICAL_PROCESS	0.00148155	0.000278951	11	2	10005	19225
[OVER]	GO:0050793	regulation of developmental process	BIOLOGICAL_PROCESS	0.00189996	0.000359198	16	6	10000	19221
[OVER]	GO:0010243	response to organonitrogen compound	BIOLOGICAL_PROCESS	0.00189996	0.000359198	16	6	10000	19221
[OVER]	GO:0043549	regulation of kinase activity	BIOLOGICAL_PROCESS	0.00199099	0.000379485	12	3	10004	19224
[OVER]	GO:0019751	polyol metabolic process	BIOLOGICAL_PROCESS	0.00199099	0.000379485	12	3	10004	19224
[OVER]	GO:0006573	valine metabolic process	BIOLOGICAL_PROCESS	0.00199099	0.000379485	12	3	10004	19224
[OVER]	GO:0045010	actin nucleation	BIOLOGICAL_PROCESS	0.00199099	0.000379485	12	3	10004	19224
[OVER]	GO:0031929	TOR signaling	BIOLOGICAL_PROCESS	0.00199099	0.000379485	12	3	10004	19224
[OVER]	GO:0046112	nucleobase biosynthetic process	BIOLOGICAL_PROCESS	0.00199099	0.000379485	12	3	10004	19224
[OVER]	GO:0051235	maintenance of location	BIOLOGICAL_PROCESS	0.00199099	0.000379485	12	3	10004	19224
[OVER]	GO:0045292	mRNA cis splicing, via spliceosome	BIOLOGICAL_PROCESS	0.00199099	0.000379485	12	3	10004	19224
[OVER]	GO:0045859	regulation of protein kinase activity	BIOLOGICAL_PROCESS	0.00199099	0.000379485	12	3	10004	19224
[OVER]	GO:0009185	ribonucleoside diphosphate metabolic process	BIOLOGICAL_PROCESS	0.00218261	0.000416346	19	9	9997	19218
[OVER]	GO:0031668	cellular response to extracellular stimulus	BIOLOGICAL_PROCESS	0.0022936	0.000447799	9	1	10007	19226
[OVER]	GO:0031669	cellular response to nutrient levels	BIOLOGICAL_PROCESS	0.0022936	0.000447799	9	1	10007	19226
[OVER]	GO:0000413	protein peptidyl-prolyl isomerization	BIOLOGICAL_PROCESS	0.0022936	0.000447799	9	1	10007	19226
[OVER]	GO:0006450	regulation of translational fidelity	BIOLOGICAL_PROCESS	0.0022936	0.000447799	9	1	10007	19226
[OVER]	GO:0030150	protein import into mitochondrial matrix	BIOLOGICAL_PROCESS	0.0022936	0.000447799	9	1	10007	19226
[OVER]	GO:0009272	fungal-type cell wall biogenesis	BIOLOGICAL_PROCESS	0.0022936	0.000447799	9	1	10007	19226
[OVER]	GO:0000966	RNA 5'-end processing	BIOLOGICAL_PROCESS	0.0022936	0.000447799	9	1	10007	19226
[OVER]	GO:0006826	iron ion transport	BIOLOGICAL_PROCESS	0.0022936	0.000447799	9	1	10007	19226
[OVER]	GO:0009062	fatty acid catabolic process	BIOLOGICAL_PROCESS	0.0022936	0.000447799	9	1	10007	19226
[OVER]	GO:0034661	ncRNA catabolic process	BIOLOGICAL_PROCESS	0.0022936	0.000447799	9	1	10007	19226
[OVER]	GO:0008360	regulation of cell shape	BIOLOGICAL_PROCESS	0.0022936	0.000447799	9	1	10007	19226
[OVER]	GO:0007088	regulation of mitotic nuclear division	BIOLOGICAL_PROCESS	0.0022936	0.000447799	9	1	10007	19226
[OVER]	GO:0071496	cellular response to external stimulus	BIOLOGICAL_PROCESS	0.0022936	0.000447799	9	1	10007	19226
[OVER]	GO:0009435	NAD biosynthetic process	BIOLOGICAL_PROCESS	0.0022936	0.000447799	9	1	10007	19226
[OVER]	GO:0051651	maintenance of location in cell	BIOLOGICAL_PROCESS	0.0022936	0.000447799	9	1	10007	19226
[OVER]	GO:0032465	regulation of cytokinesis	BIOLOGICAL_PROCESS	0.0022936	0.000447799	9	1	10007	19226
[OVER]	GO:1905818	regulation of chromosome separation	BIOLOGICAL_PROCESS	0.0022936	0.000447799	9	1	10007	19226
[OVER]	GO:0051494	negative regulation of cytoskeleton organization	BIOLOGICAL_PROCESS	0.0022936	0.000447799	9	1	10007	19226
[OVER]	GO:0010965	regulation of mitotic sister chromatid separation	BIOLOGICAL_PROCESS	0.0022936	0.000447799	9	1	10007	19226
[OVER]	GO:0006816	calcium ion transport	BIOLOGICAL_PROCESS	0.00234671	0.000461072	13	4	10003	19223
[OVER]	GO:0006892	post-Golgi vesicle-mediated transport	BIOLOGICAL_PROCESS	0.00234671	0.000461072	13	4	10003	19223
[OVER]	GO:0032505	reproduction of a single-celled organism	BIOLOGICAL_PROCESS	0.00234671	0.000461072	13	4	10003	19223
[OVER]	GO:0061025	membrane fusion	BIOLOGICAL_PROCESS	0.00234671	0.000461072	13	4	10003	19223
[OVER]	GO:0044774	mitotic DNA integrity checkpoint signaling	BIOLOGICAL_PROCESS	0.00273948	0.000552215	7	0	10009	19227
[OVER]	GO:0048311	mitochondrion distribution	BIOLOGICAL_PROCESS	0.00273948	0.000552215	7	0	10009	19227
[OVER]	GO:0045005	DNA-templated DNA replication maintenance of fidelity	BIOLOGICAL_PROCESS	0.00273948	0.000552215	7	0	10009	19227
[OVER]	GO:0034067	protein localization to Golgi apparatus	BIOLOGICAL_PROCESS	0.00273948	0.000552215	7	0	10009	19227
[OVER]	GO:0006891	intra-Golgi vesicle-mediated transport	BIOLOGICAL_PROCESS	0.00273948	0.000552215	7	0	10009	19227
[OVER]	GO:0006801	superoxide metabolic process	BIOLOGICAL_PROCESS	0.00273948	0.000552215	7	0	10009	19227
[OVER]	GO:0005978	glycogen biosynthetic process	BIOLOGICAL_PROCESS	0.00273948	0.000552215	7	0	10009	19227
[OVER]	GO:0005977	glycogen metabolic process	BIOLOGICAL_PROCESS	0.00273948	0.000552215	7	0	10009	19227
[OVER]	GO:0010508	positive regulation of autophagy	BIOLOGICAL_PROCESS	0.00273948	0.000552215	7	0	10009	19227
[OVER]	GO:0010506	regulation of autophagy	BIOLOGICAL_PROCESS	0.00273948	0.000552215	7	0	10009	19227
[OVER]	GO:0045132	meiotic chromosome segregation	BIOLOGICAL_PROCESS	0.00273948	0.000552215	7	0	10009	19227
[OVER]	GO:0015937	coenzyme A biosynthetic process	BIOLOGICAL_PROCESS	0.00273948	0.000552215	7	0	10009	19227
[OVER]	GO:0045860	positive regulation of protein kinase activity	BIOLOGICAL_PROCESS	0.00273948	0.000552215	7	0	10009	19227
[OVER]	GO:0000105	histidine biosynthetic process	BIOLOGICAL_PROCESS	0.00273948	0.000552215	7	0	10009	19227
[OVER]	GO:0000103	sulfate assimilation	BIOLOGICAL_PROCESS	0.00273948	0.000552215	7	0	10009	19227
[OVER]	GO:0051495	positive regulation of cytoskeleton organization	BIOLOGICAL_PROCESS	0.00273948	0.000552215	7	0	10009	19227
[OVER]	GO:0051503	adenine nucleotide transport	BIOLOGICAL_PROCESS	0.00273948	0.000552215	7	0	10009	19227
[OVER]	GO:0006122	mitochondrial electron transport, ubiquinol to cytochrome c	BIOLOGICAL_PROCESS	0.00273948	0.000552215	7	0	10009	19227
[OVER]	GO:0006112	energy reserve metabolic process	BIOLOGICAL_PROCESS	0.00273948	0.000552215	7	0	10009	19227
[OVER]	GO:0033674	positive regulation of kinase activity	BIOLOGICAL_PROCESS	0.00273948	0.000552215	7	0	10009	19227
[OVER]	GO:0043087	regulation of GTPase activity	BIOLOGICAL_PROCESS	0.00273948	0.000552215	7	0	10009	19227
[OVER]	GO:0031047	RNA-mediated gene silencing	BIOLOGICAL_PROCESS	0.00273948	0.000552215	7	0	10009	19227
[OVER]	GO:0015868	purine ribonucleotide transport	BIOLOGICAL_PROCESS	0.00273948	0.000552215	7	0	10009	19227
[OVER]	GO:0015865	purine nucleotide transport	BIOLOGICAL_PROCESS	0.00273948	0.000552215	7	0	10009	19227
[OVER]	GO:0043543	protein acylation	BIOLOGICAL_PROCESS	0.00321018	0.000649083	16	7	10000	19220
[OVER]	GO:0006473	protein acetylation	BIOLOGICAL_PROCESS	0.00321018	0.000649083	16	7	10000	19220
[OVER]	GO:0015833	peptide transport	BIOLOGICAL_PROCESS	0.00321018	0.000649083	16	7	10000	19220
[OVER]	GO:1901264	carbohydrate derivative transport	BIOLOGICAL_PROCESS	0.00339541	0.000694934	10	2	10006	19225
[OVER]	GO:0098781	ncRNA transcription	BIOLOGICAL_PROCESS	0.00339541	0.000694934	10	2	10006	19225
[OVER]	GO:0048584	positive regulation of response to stimulus	BIOLOGICAL_PROCESS	0.00339541	0.000694934	10	2	10006	19225
[OVER]	GO:0006739	NADP metabolic process	BIOLOGICAL_PROCESS	0.00339541	0.000694934	10	2	10006	19225
[OVER]	GO:0097237	cellular response to toxic substance	BIOLOGICAL_PROCESS	0.00339541	0.000691113	21	12	9995	19215
[OVER]	GO:0006563	L-serine metabolic process	BIOLOGICAL_PROCESS	0.00339541	0.000694934	10	2	10006	19225
[OVER]	GO:1990748	cellular detoxification	BIOLOGICAL_PROCESS	0.00339541	0.000691113	21	12	9995	19215
[OVER]	GO:0009396	folic acid-containing compound biosynthetic process	BIOLOGICAL_PROCESS	0.00339541	0.000694934	10	2	10006	19225
[OVER]	GO:0042559	pteridine-containing compound biosynthetic process	BIOLOGICAL_PROCESS	0.00339541	0.000694934	10	2	10006	19225
[OVER]	GO:0040007	growth	BIOLOGICAL_PROCESS	0.00339541	0.000694934	10	2	10006	19225
[OVER]	GO:0051205	protein insertion into membrane	BIOLOGICAL_PROCESS	0.00339541	0.000694934	10	2	10006	19225
[OVER]	GO:0000002	mitochondrial genome maintenance	BIOLOGICAL_PROCESS	0.00339541	0.000694934	10	2	10006	19225
[OVER]	GO:0006353	DNA-templated transcription termination	BIOLOGICAL_PROCESS	0.00339541	0.000694934	10	2	10006	19225
[OVER]	GO:0072330	monocarboxylic acid biosynthetic process	BIOLOGICAL_PROCESS	0.0035181	0.000721132	32	25	9984	19202
[OVER]	GO:0009135	purine nucleoside diphosphate metabolic process	BIOLOGICAL_PROCESS	0.00375477	0.000770804	18	9	9998	19218
[OVER]	GO:0009179	purine ribonucleoside diphosphate metabolic process	BIOLOGICAL_PROCESS	0.00375477	0.000770804	18	9	9998	19218
[OVER]	GO:0006487	protein N-linked glycosylation	BIOLOGICAL_PROCESS	0.00431594	0.000896014	11	3	10005	19224
[OVER]	GO:0006549	isoleucine metabolic process	BIOLOGICAL_PROCESS	0.00431594	0.000896014	11	3	10005	19224
[OVER]	GO:0009226	nucleotide-sugar biosynthetic process	BIOLOGICAL_PROCESS	0.00431594	0.000896014	11	3	10005	19224
[OVER]	GO:0009097	isoleucine biosynthetic process	BIOLOGICAL_PROCESS	0.00431594	0.000896014	11	3	10005	19224
[OVER]	GO:0009099	valine biosynthetic process	BIOLOGICAL_PROCESS	0.00431594	0.000896014	11	3	10005	19224
[OVER]	GO:0045727	positive regulation of translation	BIOLOGICAL_PROCESS	0.00431594	0.000896014	11	3	10005	19224
[OVER]	GO:0097502	mannosylation	BIOLOGICAL_PROCESS	0.00473201	0.000983854	17	8	9999	19219
[OVER]	GO:0051049	regulation of transport	BIOLOGICAL_PROCESS	0.00473201	0.000983854	17	8	9999	19219
[OVER]	GO:0048585	negative regulation of response to stimulus	BIOLOGICAL_PROCESS	0.00496257	0.00104253	12	4	10004	19223
[OVER]	GO:0023057	negative regulation of signaling	BIOLOGICAL_PROCESS	0.00496257	0.00104253	12	4	10004	19223
[OVER]	GO:0072593	reactive oxygen species metabolic process	BIOLOGICAL_PROCESS	0.00496257	0.00104253	12	4	10004	19223
[OVER]	GO:0072507	divalent inorganic cation homeostasis	BIOLOGICAL_PROCESS	0.00496257	0.00104253	12	4	10004	19223
[OVER]	GO:0046364	monosaccharide biosynthetic process	BIOLOGICAL_PROCESS	0.00496257	0.00104253	12	4	10004	19223
[OVER]	GO:0018958	phenol-containing compound metabolic process	BIOLOGICAL_PROCESS	0.00496257	0.00104253	12	4	10004	19223
[OVER]	GO:0010648	negative regulation of cell communication	BIOLOGICAL_PROCESS	0.00496257	0.00104253	12	4	10004	19223
[OVER]	GO:0019319	hexose biosynthetic process	BIOLOGICAL_PROCESS	0.00496257	0.00104253	12	4	10004	19223
[OVER]	GO:0009968	negative regulation of signal transduction	BIOLOGICAL_PROCESS	0.00496257	0.00104253	12	4	10004	19223
[OVER]	GO:0006094	gluconeogenesis	BIOLOGICAL_PROCESS	0.00496257	0.00104253	12	4	10004	19223
[OVER]	GO:0006638	neutral lipid metabolic process	BIOLOGICAL_PROCESS	0.00551296	0.00118372	8	1	10008	19226
[OVER]	GO:0000447	endonucleolytic cleavage in ITS1 to separate SSU-rRNA from 5.8S rRNA and LSU-rRNA from tricistronic rRNA transcript (SSU-rRNA, 5.8S rRNA, LSU-rRNA)	BIOLOGICAL_PROCESS	0.00551296	0.00118372	8	1	10008	19226
[OVER]	GO:0000245	spliceosomal complex assembly	BIOLOGICAL_PROCESS	0.00551296	0.00118372	8	1	10008	19226
[OVER]	GO:0030174	regulation of DNA-templated DNA replication initiation	BIOLOGICAL_PROCESS	0.00551296	0.00118372	8	1	10008	19226
[OVER]	GO:1902904	negative regulation of supramolecular fiber organization	BIOLOGICAL_PROCESS	0.00551296	0.00118372	8	1	10008	19226
[OVER]	GO:0009314	response to radiation	BIOLOGICAL_PROCESS	0.00551296	0.00118372	8	1	10008	19226
[OVER]	GO:0046349	amino sugar biosynthetic process	BIOLOGICAL_PROCESS	0.00551296	0.00118372	8	1	10008	19226
[OVER]	GO:0071025	RNA surveillance	BIOLOGICAL_PROCESS	0.00551296	0.00118372	8	1	10008	19226
[OVER]	GO:2001251	negative regulation of chromosome organization	BIOLOGICAL_PROCESS	0.00551296	0.00118372	8	1	10008	19226
[OVER]	GO:0046033	AMP metabolic process	BIOLOGICAL_PROCESS	0.00551296	0.00118372	8	1	10008	19226
[OVER]	GO:0009416	response to light stimulus	BIOLOGICAL_PROCESS	0.00551296	0.00118372	8	1	10008	19226
[OVER]	GO:0033108	mitochondrial respiratory chain complex assembly	BIOLOGICAL_PROCESS	0.00551296	0.00118372	8	1	10008	19226
[OVER]	GO:0000083	regulation of transcription involved in G1/S transition of mitotic cell cycle	BIOLOGICAL_PROCESS	0.00551296	0.00118372	8	1	10008	19226
[OVER]	GO:0031124	mRNA 3'-end processing	BIOLOGICAL_PROCESS	0.00551296	0.00118372	8	1	10008	19226
[OVER]	GO:0015939	pantothenate metabolic process	BIOLOGICAL_PROCESS	0.00551296	0.00118372	8	1	10008	19226
[OVER]	GO:0031167	rRNA methylation	BIOLOGICAL_PROCESS	0.00551296	0.00118372	8	1	10008	19226
[OVER]	GO:0018022	peptidyl-lysine methylation	BIOLOGICAL_PROCESS	0.00551296	0.00118372	8	1	10008	19226
[OVER]	GO:0032940	secretion by cell	BIOLOGICAL_PROCESS	0.00604913	0.00130446	15	7	10001	19220
[OVER]	GO:0046903	secretion	BIOLOGICAL_PROCESS	0.00604913	0.00130446	15	7	10001	19220
[OVER]	GO:0048468	cell development	BIOLOGICAL_PROCESS	0.00654125	0.00141665	14	6	10002	19221
[OVER]	GO:0000470	maturation of LSU-rRNA	BIOLOGICAL_PROCESS	0.00654125	0.00141665	14	6	10002	19221
[OVER]	GO:0030433	ubiquitin-dependent ERAD pathway	BIOLOGICAL_PROCESS	0.00654125	0.00141665	14	6	10002	19221
[OVER]	GO:0036503	ERAD pathway	BIOLOGICAL_PROCESS	0.00654125	0.00141665	14	6	10002	19221
[OVER]	GO:0000747	conjugation with cellular fusion	BIOLOGICAL_PROCESS	0.00654125	0.00141665	14	6	10002	19221
[OVER]	GO:0071897	DNA biosynthetic process	BIOLOGICAL_PROCESS	0.00654125	0.00141665	14	6	10002	19221
[OVER]	GO:0046031	ADP metabolic process	BIOLOGICAL_PROCESS	0.00661306	0.00143322	17	9	9999	19218
[OVER]	GO:0006613	cotranslational protein targeting to membrane	BIOLOGICAL_PROCESS	0.00709302	0.0016129	6	0	10010	19227
[OVER]	GO:0006614	SRP-dependent cotranslational protein targeting to membrane	BIOLOGICAL_PROCESS	0.00709302	0.0016129	6	0	10010	19227
[OVER]	GO:0032955	regulation of division septum assembly	BIOLOGICAL_PROCESS	0.00709302	0.0016129	6	0	10010	19227
[OVER]	GO:0032954	regulation of cytokinetic process	BIOLOGICAL_PROCESS	0.00709302	0.0016129	6	0	10010	19227
[OVER]	GO:0042278	purine nucleoside metabolic process	BIOLOGICAL_PROCESS	0.00709302	0.0016129	6	0	10010	19227
[OVER]	GO:0050667	homocysteine metabolic process	BIOLOGICAL_PROCESS	0.00709302	0.0016129	6	0	10010	19227
[OVER]	GO:0042726	flavin-containing compound metabolic process	BIOLOGICAL_PROCESS	0.00709302	0.0016129	6	0	10010	19227
[OVER]	GO:0042727	flavin-containing compound biosynthetic process	BIOLOGICAL_PROCESS	0.00709302	0.0016129	6	0	10010	19227
[OVER]	GO:1901659	glycosyl compound biosynthetic process	BIOLOGICAL_PROCESS	0.00709302	0.0016129	6	0	10010	19227
[OVER]	GO:0010393	galacturonan metabolic process	BIOLOGICAL_PROCESS	0.00709302	0.0016129	6	0	10010	19227
[OVER]	GO:1902750	negative regulation of cell cycle G2/M phase transition	BIOLOGICAL_PROCESS	0.00709302	0.0016129	6	0	10010	19227
[OVER]	GO:1902751	positive regulation of cell cycle G2/M phase transition	BIOLOGICAL_PROCESS	0.00709302	0.0016129	6	0	10010	19227
[OVER]	GO:0046128	purine ribonucleoside metabolic process	BIOLOGICAL_PROCESS	0.00709302	0.0016129	6	0	10010	19227
[OVER]	GO:0006900	vesicle budding from membrane	BIOLOGICAL_PROCESS	0.00709302	0.0016129	6	0	10010	19227
[OVER]	GO:0009712	catechol-containing compound metabolic process	BIOLOGICAL_PROCESS	0.00709302	0.0016129	6	0	10010	19227
[OVER]	GO:0035999	tetrahydrofolate interconversion	BIOLOGICAL_PROCESS	0.00709302	0.0016129	6	0	10010	19227
[OVER]	GO:0007030	Golgi organization	BIOLOGICAL_PROCESS	0.00709302	0.0016129	6	0	10010	19227
[OVER]	GO:0007035	vacuolar acidification	BIOLOGICAL_PROCESS	0.00709302	0.0016129	6	0	10010	19227
[OVER]	GO:0007096	regulation of exit from mitosis	BIOLOGICAL_PROCESS	0.00709302	0.0016129	6	0	10010	19227
[OVER]	GO:0051303	establishment of chromosome localization	BIOLOGICAL_PROCESS	0.00709302	0.0016129	6	0	10010	19227
[OVER]	GO:0050000	chromosome localization	BIOLOGICAL_PROCESS	0.00709302	0.0016129	6	0	10010	19227
[OVER]	GO:0051345	positive regulation of hydrolase activity	BIOLOGICAL_PROCESS	0.00709302	0.0016129	6	0	10010	19227
[OVER]	GO:0045488	pectin metabolic process	BIOLOGICAL_PROCESS	0.00709302	0.0016129	6	0	10010	19227
[OVER]	GO:0045490	pectin catabolic process	BIOLOGICAL_PROCESS	0.00709302	0.0016129	6	0	10010	19227
[OVER]	GO:0010458	exit from mitosis	BIOLOGICAL_PROCESS	0.00709302	0.0016129	6	0	10010	19227
[OVER]	GO:0045143	homologous chromosome segregation	BIOLOGICAL_PROCESS	0.00709302	0.0016129	6	0	10010	19227
[OVER]	GO:1901891	regulation of cell septum assembly	BIOLOGICAL_PROCESS	0.00709302	0.0016129	6	0	10010	19227
[OVER]	GO:0002182	cytoplasmic translational elongation	BIOLOGICAL_PROCESS	0.00709302	0.0016129	6	0	10010	19227
[OVER]	GO:0046500	S-adenosylmethionine metabolic process	BIOLOGICAL_PROCESS	0.00709302	0.0016129	6	0	10010	19227
[OVER]	GO:0006167	AMP biosynthetic process	BIOLOGICAL_PROCESS	0.00709302	0.0016129	6	0	10010	19227
[OVER]	GO:0000001	mitochondrion inheritance	BIOLOGICAL_PROCESS	0.00709302	0.0016129	6	0	10010	19227
[OVER]	GO:0017004	cytochrome complex assembly	BIOLOGICAL_PROCESS	0.00709302	0.0016129	6	0	10010	19227
[OVER]	GO:0006285	base-excision repair, AP site formation	BIOLOGICAL_PROCESS	0.00709302	0.0016129	6	0	10010	19227
[OVER]	GO:0010972	negative regulation of G2/M transition of mitotic cell cycle	BIOLOGICAL_PROCESS	0.00709302	0.0016129	6	0	10010	19227
[OVER]	GO:0051452	intracellular pH reduction	BIOLOGICAL_PROCESS	0.00709302	0.0016129	6	0	10010	19227
[OVER]	GO:0019236	response to pheromone	BIOLOGICAL_PROCESS	0.00709302	0.0016129	6	0	10010	19227
[OVER]	GO:0006123	mitochondrial electron transport, cytochrome c to oxygen	BIOLOGICAL_PROCESS	0.00709302	0.0016129	6	0	10010	19227
[OVER]	GO:0019346	transsulfuration	BIOLOGICAL_PROCESS	0.00709302	0.0016129	6	0	10010	19227
[OVER]	GO:0006040	amino sugar metabolic process	BIOLOGICAL_PROCESS	0.00730602	0.00166359	13	5	10003	19222
[OVER]	GO:0006448	regulation of translational elongation	BIOLOGICAL_PROCESS	0.00739851	0.00170753	9	2	10007	19225
[OVER]	GO:0031334	positive regulation of protein-containing complex assembly	BIOLOGICAL_PROCESS	0.00739851	0.00170753	9	2	10007	19225
[OVER]	GO:0023056	positive regulation of signaling	BIOLOGICAL_PROCESS	0.00739851	0.00170753	9	2	10007	19225
[OVER]	GO:0000302	response to reactive oxygen species	BIOLOGICAL_PROCESS	0.00739851	0.00170753	9	2	10007	19225
[OVER]	GO:0010647	positive regulation of cell communication	BIOLOGICAL_PROCESS	0.00739851	0.00170753	9	2	10007	19225
[OVER]	GO:0051156	glucose 6-phosphate metabolic process	BIOLOGICAL_PROCESS	0.00739851	0.00170753	9	2	10007	19225
[OVER]	GO:0006284	base-excision repair	BIOLOGICAL_PROCESS	0.00739851	0.00170753	9	2	10007	19225
[OVER]	GO:0044205	'de novo' UMP biosynthetic process	BIOLOGICAL_PROCESS	0.00739851	0.00170753	9	2	10007	19225
[OVER]	GO:0044396	actin cortical patch organization	BIOLOGICAL_PROCESS	0.00739851	0.00170753	9	2	10007	19225
[OVER]	GO:0015849	organic acid transport	BIOLOGICAL_PROCESS	0.0074796	0.0017274	27	20	9989	19207
[OVER]	GO:1901136	carbohydrate derivative catabolic process	BIOLOGICAL_PROCESS	0.00765605	0.00176933	16	8	10000	19219
[OVER]	GO:0042176	regulation of protein catabolic process	BIOLOGICAL_PROCESS	0.00887641	0.00208154	10	3	10006	19224
[OVER]	GO:0071214	cellular response to abiotic stimulus	BIOLOGICAL_PROCESS	0.00887641	0.00208154	10	3	10006	19224
[OVER]	GO:0035672	oligopeptide transmembrane transport	BIOLOGICAL_PROCESS	0.00887641	0.00208154	10	3	10006	19224
[OVER]	GO:0046049	UMP metabolic process	BIOLOGICAL_PROCESS	0.00887641	0.00208154	10	3	10006	19224
[OVER]	GO:0090174	organelle membrane fusion	BIOLOGICAL_PROCESS	0.00887641	0.00208154	10	3	10006	19224
[OVER]	GO:0009174	pyrimidine ribonucleoside monophosphate biosynthetic process	BIOLOGICAL_PROCESS	0.00887641	0.00208154	10	3	10006	19224
[OVER]	GO:0009173	pyrimidine ribonucleoside monophosphate metabolic process	BIOLOGICAL_PROCESS	0.00887641	0.00208154	10	3	10006	19224
[OVER]	GO:0045324	late endosome to vacuole transport	BIOLOGICAL_PROCESS	0.00887641	0.00208154	10	3	10006	19224
[OVER]	GO:0005984	disaccharide metabolic process	BIOLOGICAL_PROCESS	0.00887641	0.00208154	10	3	10006	19224
[OVER]	GO:0051123	RNA polymerase II preinitiation complex assembly	BIOLOGICAL_PROCESS	0.00887641	0.00208154	10	3	10006	19224
[OVER]	GO:0104004	cellular response to environmental stimulus	BIOLOGICAL_PROCESS	0.00887641	0.00208154	10	3	10006	19224
[OVER]	GO:0006222	UMP biosynthetic process	BIOLOGICAL_PROCESS	0.00887641	0.00208154	10	3	10006	19224
[OVER]	GO:0032509	endosome transport via multivesicular body sorting pathway	BIOLOGICAL_PROCESS	0.00887641	0.00208154	10	3	10006	19224
[OVER]	GO:0043244	regulation of protein-containing complex disassembly	BIOLOGICAL_PROCESS	0.00887641	0.00208154	10	3	10006	19224
[OVER]	GO:0045862	positive regulation of proteolysis	BIOLOGICAL_PROCESS	0.00887641	0.00208154	10	3	10006	19224
[OVER]	GO:0070897	transcription preinitiation complex assembly	BIOLOGICAL_PROCESS	0.00887641	0.00208154	10	3	10006	19224
[OVER]	GO:0071900	regulation of protein serine/threonine kinase activity	BIOLOGICAL_PROCESS	0.00887641	0.00208154	10	3	10006	19224
[OVER]	GO:0098869	cellular oxidant detoxification	BIOLOGICAL_PROCESS	0.00938326	0.00220185	19	12	9997	19215
[OVER]	GO:0006165	nucleoside diphosphate phosphorylation	BIOLOGICAL_PROCESS	0.0113233	0.00266059	16	9	10000	19218
[OVER]	GO:0042181	ketone biosynthetic process	BIOLOGICAL_PROCESS	0.0119488	0.00281865	13	6	10003	19221
[OVER]	GO:0048646	anatomical structure formation involved in morphogenesis	BIOLOGICAL_PROCESS	0.0119488	0.00281865	13	6	10003	19221
[OVER]	GO:0008643	carbohydrate transport	BIOLOGICAL_PROCESS	0.0123398	0.00291278	24	18	9992	19209
[OVER]	GO:0006639	acylglycerol metabolic process	BIOLOGICAL_PROCESS	0.0126452	0.00309435	7	1	10009	19226
[OVER]	GO:0031577	spindle checkpoint signaling	BIOLOGICAL_PROCESS	0.0126452	0.00309435	7	1	10009	19226
[OVER]	GO:0000472	endonucleolytic cleavage to generate mature 5'-end of SSU-rRNA from (SSU-rRNA, 5.8S rRNA, LSU-rRNA)	BIOLOGICAL_PROCESS	0.0126452	0.00309435	7	1	10009	19226
[OVER]	GO:1902407	assembly of actomyosin apparatus involved in mitotic cytokinesis	BIOLOGICAL_PROCESS	0.0126452	0.00309435	7	1	10009	19226
[OVER]	GO:1902476	chloride transmembrane transport	BIOLOGICAL_PROCESS	0.0126452	0.00309435	7	1	10009	19226
[OVER]	GO:0030447	filamentous growth	BIOLOGICAL_PROCESS	0.0126452	0.00309435	7	1	10009	19226
[OVER]	GO:0016075	rRNA catabolic process	BIOLOGICAL_PROCESS	0.0126452	0.00309435	7	1	10009	19226
[OVER]	GO:0031333	negative regulation of protein-containing complex assembly	BIOLOGICAL_PROCESS	0.0126452	0.00309435	7	1	10009	19226
[OVER]	GO:0042723	thiamine-containing compound metabolic process	BIOLOGICAL_PROCESS	0.0126452	0.00309435	7	1	10009	19226
[OVER]	GO:0071265	L-methionine biosynthetic process	BIOLOGICAL_PROCESS	0.0126452	0.00309435	7	1	10009	19226
[OVER]	GO:0000917	division septum assembly	BIOLOGICAL_PROCESS	0.0126452	0.00309435	7	1	10009	19226
[OVER]	GO:0000915	actomyosin contractile ring assembly	BIOLOGICAL_PROCESS	0.0126452	0.00309435	7	1	10009	19226
[OVER]	GO:0000912	assembly of actomyosin apparatus involved in cytokinesis	BIOLOGICAL_PROCESS	0.0126452	0.00309435	7	1	10009	19226
[OVER]	GO:1901616	organic hydroxy compound catabolic process	BIOLOGICAL_PROCESS	0.0126452	0.00309435	7	1	10009	19226
[OVER]	GO:0090503	RNA phosphodiester bond hydrolysis, exonucleolytic	BIOLOGICAL_PROCESS	0.0126452	0.00309435	7	1	10009	19226
[OVER]	GO:0000967	rRNA 5'-end processing	BIOLOGICAL_PROCESS	0.0126452	0.00309435	7	1	10009	19226
[OVER]	GO:0033047	regulation of mitotic sister chromatid segregation	BIOLOGICAL_PROCESS	0.0126452	0.00309435	7	1	10009	19226
[OVER]	GO:0006821	chloride transport	BIOLOGICAL_PROCESS	0.0126452	0.00309435	7	1	10009	19226
[OVER]	GO:0009092	homoserine metabolic process	BIOLOGICAL_PROCESS	0.0126452	0.00309435	7	1	10009	19226
[OVER]	GO:0071027	nuclear RNA surveillance	BIOLOGICAL_PROCESS	0.0126452	0.00309435	7	1	10009	19226
[OVER]	GO:0046164	alcohol catabolic process	BIOLOGICAL_PROCESS	0.0126452	0.00309435	7	1	10009	19226
[OVER]	GO:0046174	polyol catabolic process	BIOLOGICAL_PROCESS	0.0126452	0.00309435	7	1	10009	19226
[OVER]	GO:0071174	mitotic spindle checkpoint signaling	BIOLOGICAL_PROCESS	0.0126452	0.00309435	7	1	10009	19226
[OVER]	GO:0044038	cell wall macromolecule biosynthetic process	BIOLOGICAL_PROCESS	0.0126452	0.00309435	7	1	10009	19226
[OVER]	GO:0007076	mitotic chromosome condensation	BIOLOGICAL_PROCESS	0.0126452	0.00309435	7	1	10009	19226
[OVER]	GO:0009411	response to UV	BIOLOGICAL_PROCESS	0.0126452	0.00309435	7	1	10009	19226
[OVER]	GO:0090529	cell septum assembly	BIOLOGICAL_PROCESS	0.0126452	0.00309435	7	1	10009	19226
[OVER]	GO:0034471	ncRNA 5'-end processing	BIOLOGICAL_PROCESS	0.0126452	0.00309435	7	1	10009	19226
[OVER]	GO:1903475	mitotic actomyosin contractile ring assembly	BIOLOGICAL_PROCESS	0.0126452	0.00309435	7	1	10009	19226
[OVER]	GO:0043101	purine-containing compound salvage	BIOLOGICAL_PROCESS	0.0126452	0.00309435	7	1	10009	19226
[OVER]	GO:0015940	pantothenate biosynthetic process	BIOLOGICAL_PROCESS	0.0126452	0.00309435	7	1	10009	19226
[OVER]	GO:0006298	mismatch repair	BIOLOGICAL_PROCESS	0.0126452	0.00309435	7	1	10009	19226
[OVER]	GO:0140115	export across plasma membrane	BIOLOGICAL_PROCESS	0.0126452	0.00309435	7	1	10009	19226
[OVER]	GO:0070589	cellular component macromolecule biosynthetic process	BIOLOGICAL_PROCESS	0.0126452	0.00309435	7	1	10009	19226
[OVER]	GO:0019344	cysteine biosynthetic process	BIOLOGICAL_PROCESS	0.0126452	0.00309435	7	1	10009	19226
[OVER]	GO:1901661	quinone metabolic process	BIOLOGICAL_PROCESS	0.0131823	0.003238	12	5	10004	19222
[OVER]	GO:1901663	quinone biosynthetic process	BIOLOGICAL_PROCESS	0.0131823	0.003238	12	5	10004	19222
[OVER]	GO:0006857	oligopeptide transport	BIOLOGICAL_PROCESS	0.0131823	0.003238	12	5	10004	19222
[OVER]	GO:0000226	microtubule cytoskeleton organization	BIOLOGICAL_PROCESS	0.0141434	0.00347845	17	10	9999	19217
[OVER]	GO:1902533	positive regulation of intracellular signal transduction	BIOLOGICAL_PROCESS	0.0165532	0.00412741	8	2	10008	19225
[OVER]	GO:0006672	ceramide metabolic process	BIOLOGICAL_PROCESS	0.0165532	0.00412741	8	2	10008	19225
[OVER]	GO:0030261	chromosome condensation	BIOLOGICAL_PROCESS	0.0165532	0.00412741	8	2	10008	19225
[OVER]	GO:0006782	protoporphyrinogen IX biosynthetic process	BIOLOGICAL_PROCESS	0.0165532	0.00412741	8	2	10008	19225
[OVER]	GO:0001522	pseudouridine synthesis	BIOLOGICAL_PROCESS	0.0165532	0.00412741	8	2	10008	19225
[OVER]	GO:0006536	glutamate metabolic process	BIOLOGICAL_PROCESS	0.0165532	0.00412741	8	2	10008	19225
[OVER]	GO:1902850	microtubule cytoskeleton organization involved in mitosis	BIOLOGICAL_PROCESS	0.0165532	0.00412741	8	2	10008	19225
[OVER]	GO:0009085	lysine biosynthetic process	BIOLOGICAL_PROCESS	0.0165532	0.00412741	8	2	10008	19225
[OVER]	GO:0046189	phenol-containing compound biosynthetic process	BIOLOGICAL_PROCESS	0.0165532	0.00412741	8	2	10008	19225
[OVER]	GO:0008219	cell death	BIOLOGICAL_PROCESS	0.0165532	0.00412741	8	2	10008	19225
[OVER]	GO:0046501	protoporphyrinogen IX metabolic process	BIOLOGICAL_PROCESS	0.0165532	0.00412741	8	2	10008	19225
[OVER]	GO:0051784	negative regulation of nuclear division	BIOLOGICAL_PROCESS	0.0165532	0.00412741	8	2	10008	19225
[OVER]	GO:0009967	positive regulation of signal transduction	BIOLOGICAL_PROCESS	0.0165532	0.00412741	8	2	10008	19225
[OVER]	GO:0019321	pentose metabolic process	BIOLOGICAL_PROCESS	0.0165532	0.00412741	8	2	10008	19225
[OVER]	GO:0030258	lipid modification	BIOLOGICAL_PROCESS	0.016654	0.004168	11	4	10005	19223
[OVER]	GO:0072503	cellular divalent inorganic cation homeostasis	BIOLOGICAL_PROCESS	0.016654	0.004168	11	4	10005	19223
[OVER]	GO:0034250	positive regulation of amide metabolic process	BIOLOGICAL_PROCESS	0.016654	0.004168	11	4	10005	19223
[OVER]	GO:0009129	pyrimidine nucleoside monophosphate metabolic process	BIOLOGICAL_PROCESS	0.016654	0.004168	11	4	10005	19223
[OVER]	GO:0009130	pyrimidine nucleoside monophosphate biosynthetic process	BIOLOGICAL_PROCESS	0.016654	0.004168	11	4	10005	19223
[OVER]	GO:0000160	phosphorelay signal transduction system	BIOLOGICAL_PROCESS	0.016654	0.004168	11	4	10005	19223
[OVER]	GO:0019954	asexual reproduction	BIOLOGICAL_PROCESS	0.0168356	0.00422908	14	7	10002	19220
[OVER]	GO:0006475	internal protein amino acid acetylation	BIOLOGICAL_PROCESS	0.0168356	0.00422908	14	7	10002	19220
[OVER]	GO:0018394	peptidyl-lysine acetylation	BIOLOGICAL_PROCESS	0.0168356	0.00422908	14	7	10002	19220
[OVER]	GO:0018393	internal peptidyl-lysine acetylation	BIOLOGICAL_PROCESS	0.0168356	0.00422908	14	7	10002	19220
[OVER]	GO:0016573	histone acetylation	BIOLOGICAL_PROCESS	0.0168356	0.00422908	14	7	10002	19220
[OVER]	GO:0046942	carboxylic acid transport	BIOLOGICAL_PROCESS	0.0168356	0.00422908	14	7	10002	19220
[OVER]	GO:1902532	negative regulation of intracellular signal transduction	BIOLOGICAL_PROCESS	0.017693	0.0047453	9	3	10007	19224
[OVER]	GO:0030242	autophagy of peroxisome	BIOLOGICAL_PROCESS	0.017693	0.00471061	5	0	10011	19227
[OVER]	GO:0042438	melanin biosynthetic process	BIOLOGICAL_PROCESS	0.017693	0.00471061	5	0	10011	19227
[OVER]	GO:0140719	constitutive heterochromatin formation	BIOLOGICAL_PROCESS	0.017693	0.0047453	9	3	10007	19224
[OVER]	GO:1902315	nuclear cell cycle DNA replication initiation	BIOLOGICAL_PROCESS	0.017693	0.00471061	5	0	10011	19227
[OVER]	GO:0000291	nuclear-transcribed mRNA catabolic process, exonucleolytic	BIOLOGICAL_PROCESS	0.017693	0.00471061	5	0	10011	19227
[OVER]	GO:0006458	'de novo' protein folding	BIOLOGICAL_PROCESS	0.017693	0.0047453	9	3	10007	19224
[OVER]	GO:0070914	UV-damage excision repair	BIOLOGICAL_PROCESS	0.017693	0.00471061	5	0	10011	19227
[OVER]	GO:0051984	positive regulation of chromosome segregation	BIOLOGICAL_PROCESS	0.017693	0.00471061	5	0	10011	19227
[OVER]	GO:1902292	cell cycle DNA replication initiation	BIOLOGICAL_PROCESS	0.017693	0.00471061	5	0	10011	19227
[OVER]	GO:0006553	lysine metabolic process	BIOLOGICAL_PROCESS	0.017693	0.0047453	9	3	10007	19224
[OVER]	GO:0044818	mitotic G2/M transition checkpoint	BIOLOGICAL_PROCESS	0.017693	0.00471061	5	0	10011	19227
[OVER]	GO:0006582	melanin metabolic process	BIOLOGICAL_PROCESS	0.017693	0.00471061	5	0	10011	19227
[OVER]	GO:0017182	peptidyl-diphthamide metabolic process	BIOLOGICAL_PROCESS	0.017693	0.00471061	5	0	10011	19227
[OVER]	GO:0017183	peptidyl-diphthamide biosynthetic process from peptidyl-histidine	BIOLOGICAL_PROCESS	0.017693	0.00471061	5	0	10011	19227
[OVER]	GO:0030148	sphingolipid biosynthetic process	BIOLOGICAL_PROCESS	0.017693	0.0047453	9	3	10007	19224
[OVER]	GO:0000305	response to oxygen radical	BIOLOGICAL_PROCESS	0.017693	0.00471061	5	0	10011	19227
[OVER]	GO:0000303	response to superoxide	BIOLOGICAL_PROCESS	0.017693	0.00471061	5	0	10011	19227
[OVER]	GO:0030705	cytoskeleton-dependent intracellular transport	BIOLOGICAL_PROCESS	0.017693	0.00471061	5	0	10011	19227
[OVER]	GO:0071267	L-methionine salvage	BIOLOGICAL_PROCESS	0.017693	0.00471061	5	0	10011	19227
[OVER]	GO:0034227	tRNA thio-modification	BIOLOGICAL_PROCESS	0.017693	0.00471061	5	0	10011	19227
[OVER]	GO:1902975	mitotic DNA replication initiation	BIOLOGICAL_PROCESS	0.017693	0.00471061	5	0	10011	19227
[OVER]	GO:0070071	proton-transporting two-sector ATPase complex assembly	BIOLOGICAL_PROCESS	0.017693	0.00471061	5	0	10011	19227
[OVER]	GO:0045053	protein retention in Golgi apparatus	BIOLOGICAL_PROCESS	0.017693	0.00471061	5	0	10011	19227
[OVER]	GO:1900247	regulation of cytoplasmic translational elongation	BIOLOGICAL_PROCESS	0.017693	0.00471061	5	0	10011	19227
[OVER]	GO:0016239	positive regulation of macroautophagy	BIOLOGICAL_PROCESS	0.017693	0.00471061	5	0	10011	19227
[OVER]	GO:0016241	regulation of macroautophagy	BIOLOGICAL_PROCESS	0.017693	0.00471061	5	0	10011	19227
[OVER]	GO:0042451	purine nucleoside biosynthetic process	BIOLOGICAL_PROCESS	0.017693	0.00471061	5	0	10011	19227
[OVER]	GO:0042455	ribonucleoside biosynthetic process	BIOLOGICAL_PROCESS	0.017693	0.00471061	5	0	10011	19227
[OVER]	GO:0000725	recombinational repair	BIOLOGICAL_PROCESS	0.017693	0.0047453	9	3	10007	19224
[OVER]	GO:0000724	double-strand break repair via homologous recombination	BIOLOGICAL_PROCESS	0.017693	0.0047453	9	3	10007	19224
[OVER]	GO:0009163	nucleoside biosynthetic process	BIOLOGICAL_PROCESS	0.017693	0.00471061	5	0	10011	19227
[OVER]	GO:0046129	purine ribonucleoside biosynthetic process	BIOLOGICAL_PROCESS	0.017693	0.00471061	5	0	10011	19227
[OVER]	GO:0006906	vesicle fusion	BIOLOGICAL_PROCESS	0.017693	0.0047453	9	3	10007	19224
[OVER]	GO:0051274	beta-glucan biosynthetic process	BIOLOGICAL_PROCESS	0.017693	0.00471061	5	0	10011	19227
[OVER]	GO:0052547	regulation of peptidase activity	BIOLOGICAL_PROCESS	0.017693	0.00471061	5	0	10011	19227
[OVER]	GO:0099111	microtubule-based transport	BIOLOGICAL_PROCESS	0.017693	0.00471061	5	0	10011	19227
[OVER]	GO:0007064	mitotic sister chromatid cohesion	BIOLOGICAL_PROCESS	0.017693	0.00471061	5	0	10011	19227
[OVER]	GO:0051310	metaphase plate congression	BIOLOGICAL_PROCESS	0.017693	0.00471061	5	0	10011	19227
[OVER]	GO:0070475	rRNA base methylation	BIOLOGICAL_PROCESS	0.017693	0.00471061	5	0	10011	19227
[OVER]	GO:0044182	filamentous growth of a population of unicellular organisms	BIOLOGICAL_PROCESS	0.017693	0.00471061	5	0	10011	19227
[OVER]	GO:1901970	positive regulation of mitotic sister chromatid separation	BIOLOGICAL_PROCESS	0.017693	0.00471061	5	0	10011	19227
[OVER]	GO:0071450	cellular response to oxygen radical	BIOLOGICAL_PROCESS	0.017693	0.00471061	5	0	10011	19227
[OVER]	GO:0071451	cellular response to superoxide	BIOLOGICAL_PROCESS	0.017693	0.00471061	5	0	10011	19227
[OVER]	GO:0042908	xenobiotic transport	BIOLOGICAL_PROCESS	0.017693	0.00471061	5	0	10011	19227
[OVER]	GO:0034404	nucleobase-containing small molecule biosynthetic process	BIOLOGICAL_PROCESS	0.017693	0.00471061	5	0	10011	19227
[OVER]	GO:0051053	negative regulation of DNA metabolic process	BIOLOGICAL_PROCESS	0.017693	0.00471061	5	0	10011	19227
[OVER]	GO:0051648	vesicle localization	BIOLOGICAL_PROCESS	0.017693	0.00471061	5	0	10011	19227
[OVER]	GO:0051650	establishment of vesicle localization	BIOLOGICAL_PROCESS	0.017693	0.00471061	5	0	10011	19227
[OVER]	GO:0019509	L-methionine salvage from methylthioadenosine	BIOLOGICAL_PROCESS	0.017693	0.00471061	5	0	10011	19227
[OVER]	GO:0032527	protein exit from endoplasmic reticulum	BIOLOGICAL_PROCESS	0.017693	0.00471061	5	0	10011	19227
[OVER]	GO:0043102	amino acid salvage	BIOLOGICAL_PROCESS	0.017693	0.00471061	5	0	10011	19227
[OVER]	GO:0031145	anaphase-promoting complex-dependent catabolic process	BIOLOGICAL_PROCESS	0.017693	0.00471061	5	0	10011	19227
[OVER]	GO:0070783	growth of unicellular organism as a thread of attached cells	BIOLOGICAL_PROCESS	0.017693	0.00471061	5	0	10011	19227
[OVER]	GO:0051785	positive regulation of nuclear division	BIOLOGICAL_PROCESS	0.017693	0.00471061	5	0	10011	19227
[OVER]	GO:0006359	regulation of transcription by RNA polymerase III	BIOLOGICAL_PROCESS	0.017693	0.00471061	5	0	10011	19227
[OVER]	GO:0006273	lagging strand elongation	BIOLOGICAL_PROCESS	0.017693	0.00471061	5	0	10011	19227
[OVER]	GO:1905820	positive regulation of chromosome separation	BIOLOGICAL_PROCESS	0.017693	0.00471061	5	0	10011	19227
[OVER]	GO:0001172	RNA-templated transcription	BIOLOGICAL_PROCESS	0.017693	0.00471061	5	0	10011	19227
[OVER]	GO:0010970	transport along microtubule	BIOLOGICAL_PROCESS	0.017693	0.00471061	5	0	10011	19227
[OVER]	GO:0010971	positive regulation of G2/M transition of mitotic cell cycle	BIOLOGICAL_PROCESS	0.017693	0.00471061	5	0	10011	19227
[OVER]	GO:0019430	removal of superoxide radicals	BIOLOGICAL_PROCESS	0.017693	0.00471061	5	0	10011	19227
[OVER]	GO:0031028	septation initiation signaling	BIOLOGICAL_PROCESS	0.017693	0.00471061	5	0	10011	19227
[OVER]	GO:0071902	positive regulation of protein serine/threonine kinase activity	BIOLOGICAL_PROCESS	0.017693	0.00471061	5	0	10011	19227
[OVER]	GO:0015867	ATP transport	BIOLOGICAL_PROCESS	0.017693	0.00471061	5	0	10011	19227
[OVER]	GO:0006757	ATP generation from ADP	BIOLOGICAL_PROCESS	0.0182657	0.00490454	15	9	10001	19218
[OVER]	GO:0006096	glycolytic process	BIOLOGICAL_PROCESS	0.0182657	0.00490454	15	9	10001	19218
[OVER]	GO:0042180	cellular ketone metabolic process	BIOLOGICAL_PROCESS	0.0218163	0.00586467	18	12	9998	19215
[OVER]	GO:0046939	nucleotide phosphorylation	BIOLOGICAL_PROCESS	0.0220066	0.00591923	16	10	10000	19217
[OVER]	GO:0030488	tRNA methylation	BIOLOGICAL_PROCESS	0.0234758	0.00633617	11	5	10005	19222
[OVER]	GO:0007006	mitochondrial membrane organization	BIOLOGICAL_PROCESS	0.0234758	0.00633617	11	5	10005	19222
[OVER]	GO:0006641	triglyceride metabolic process	BIOLOGICAL_PROCESS	0.0281063	0.00797699	6	1	10010	19226
[OVER]	GO:0019932	second-messenger-mediated signaling	BIOLOGICAL_PROCESS	0.0281063	0.00797699	6	1	10010	19226
[OVER]	GO:0043634	polyadenylation-dependent ncRNA catabolic process	BIOLOGICAL_PROCESS	0.0281063	0.00797699	6	1	10010	19226
[OVER]	GO:0106074	aminoacyl-tRNA metabolism involved in translational fidelity	BIOLOGICAL_PROCESS	0.0281063	0.00797699	6	1	10010	19226
[OVER]	GO:0000480	endonucleolytic cleavage in 5'-ETS of tricistronic rRNA transcript (SSU-rRNA, 5.8S rRNA, LSU-rRNA)	BIOLOGICAL_PROCESS	0.0281063	0.00797699	6	1	10010	19226
[OVER]	GO:1902404	mitotic actomyosin contractile ring contraction	BIOLOGICAL_PROCESS	0.0281063	0.00797699	6	1	10010	19226
[OVER]	GO:0097576	vacuole fusion	BIOLOGICAL_PROCESS	0.0281063	0.00797699	6	1	10010	19226
[OVER]	GO:0030435	sporulation resulting in formation of a cellular spore	BIOLOGICAL_PROCESS	0.0281063	0.00786213	10	4	10006	19223
[OVER]	GO:0036213	contractile ring contraction	BIOLOGICAL_PROCESS	0.0281063	0.00797699	6	1	10010	19226
[OVER]	GO:0006515	protein quality control for misfolded or incompletely synthesized proteins	BIOLOGICAL_PROCESS	0.0281063	0.00797699	6	1	10010	19226
[OVER]	GO:0051985	negative regulation of chromosome segregation	BIOLOGICAL_PROCESS	0.0281063	0.00797699	6	1	10010	19226
[OVER]	GO:0006570	tyrosine metabolic process	BIOLOGICAL_PROCESS	0.0281063	0.00797699	6	1	10010	19226
[OVER]	GO:0042144	vacuole fusion, non-autophagic	BIOLOGICAL_PROCESS	0.0281063	0.00797699	6	1	10010	19226
[OVER]	GO:0140527	reciprocal homologous recombination	BIOLOGICAL_PROCESS	0.0281063	0.00797699	6	1	10010	19226
[OVER]	GO:0000387	spliceosomal snRNP assembly	BIOLOGICAL_PROCESS	0.0281063	0.00797699	6	1	10010	19226
[OVER]	GO:0000916	actomyosin contractile ring contraction	BIOLOGICAL_PROCESS	0.0281063	0.00797699	6	1	10010	19226
[OVER]	GO:0009266	response to temperature stimulus	BIOLOGICAL_PROCESS	0.0281063	0.00797699	6	1	10010	19226
[OVER]	GO:0030837	negative regulation of actin filament polymerization	BIOLOGICAL_PROCESS	0.0281063	0.00797699	6	1	10010	19226
[OVER]	GO:1905037	autophagosome organization	BIOLOGICAL_PROCESS	0.0281063	0.00797699	6	1	10010	19226
[OVER]	GO:0033048	negative regulation of mitotic sister chromatid segregation	BIOLOGICAL_PROCESS	0.0281063	0.00797699	6	1	10010	19226
[OVER]	GO:0033046	negative regulation of sister chromatid segregation	BIOLOGICAL_PROCESS	0.0281063	0.00797699	6	1	10010	19226
[OVER]	GO:0071029	nuclear ncRNA surveillance	BIOLOGICAL_PROCESS	0.0281063	0.00797699	6	1	10010	19226
[OVER]	GO:0006879	cellular iron ion homeostasis	BIOLOGICAL_PROCESS	0.0281063	0.00797699	6	1	10010	19226
[OVER]	GO:0071046	nuclear polyadenylation-dependent ncRNA catabolic process	BIOLOGICAL_PROCESS	0.0281063	0.00797699	6	1	10010	19226
[OVER]	GO:0071173	spindle assembly checkpoint signaling	BIOLOGICAL_PROCESS	0.0281063	0.00797699	6	1	10010	19226
[OVER]	GO:0009113	purine nucleobase biosynthetic process	BIOLOGICAL_PROCESS	0.0281063	0.00797699	6	1	10010	19226
[OVER]	GO:0009166	nucleotide catabolic process	BIOLOGICAL_PROCESS	0.0281063	0.00797699	6	1	10010	19226
[OVER]	GO:0038202	TORC1 signaling	BIOLOGICAL_PROCESS	0.0281063	0.00797699	6	1	10010	19226
[OVER]	GO:0007007	inner mitochondrial membrane organization	BIOLOGICAL_PROCESS	0.0281063	0.00797699	6	1	10010	19226
[OVER]	GO:0034644	cellular response to UV	BIOLOGICAL_PROCESS	0.0281063	0.00797699	6	1	10010	19226
[OVER]	GO:0007094	mitotic spindle assembly checkpoint signaling	BIOLOGICAL_PROCESS	0.0281063	0.00797699	6	1	10010	19226
[OVER]	GO:0007131	reciprocal meiotic recombination	BIOLOGICAL_PROCESS	0.0281063	0.00797699	6	1	10010	19226
[OVER]	GO:0046785	microtubule polymerization	BIOLOGICAL_PROCESS	0.0281063	0.00797699	6	1	10010	19226
[OVER]	GO:0005991	trehalose metabolic process	BIOLOGICAL_PROCESS	0.0281063	0.00797699	6	1	10010	19226
[OVER]	GO:0071482	cellular response to light stimulus	BIOLOGICAL_PROCESS	0.0281063	0.00797699	6	1	10010	19226
[OVER]	GO:0071478	cellular response to radiation	BIOLOGICAL_PROCESS	0.0281063	0.00797699	6	1	10010	19226
[OVER]	GO:0009408	response to heat	BIOLOGICAL_PROCESS	0.0281063	0.00797699	6	1	10010	19226
[OVER]	GO:0034440	lipid oxidation	BIOLOGICAL_PROCESS	0.0281063	0.00797699	6	1	10010	19226
[OVER]	GO:0034508	centromere complex assembly	BIOLOGICAL_PROCESS	0.0281063	0.00797699	6	1	10010	19226
[OVER]	GO:0051086	chaperone mediated protein folding independent of cofactor	BIOLOGICAL_PROCESS	0.0281063	0.00797699	6	1	10010	19226
[OVER]	GO:0051098	regulation of binding	BIOLOGICAL_PROCESS	0.0281063	0.00797699	6	1	10010	19226
[OVER]	GO:0051050	positive regulation of transport	BIOLOGICAL_PROCESS	0.0281063	0.00786213	10	4	10006	19223
[OVER]	GO:0000045	autophagosome assembly	BIOLOGICAL_PROCESS	0.0281063	0.00797699	6	1	10010	19226
[OVER]	GO:1902100	negative regulation of metaphase/anaphase transition of cell cycle	BIOLOGICAL_PROCESS	0.0281063	0.00797699	6	1	10010	19226
[OVER]	GO:0045839	negative regulation of mitotic nuclear division	BIOLOGICAL_PROCESS	0.0281063	0.00797699	6	1	10010	19226
[OVER]	GO:0018202	peptidyl-histidine modification	BIOLOGICAL_PROCESS	0.0281063	0.00797699	6	1	10010	19226
[OVER]	GO:0031109	microtubule polymerization or depolymerization	BIOLOGICAL_PROCESS	0.0281063	0.00797699	6	1	10010	19226
[OVER]	GO:0031125	rRNA 3'-end processing	BIOLOGICAL_PROCESS	0.0281063	0.00797699	6	1	10010	19226
[OVER]	GO:0045841	negative regulation of mitotic metaphase/anaphase transition	BIOLOGICAL_PROCESS	0.0281063	0.00797699	6	1	10010	19226
[OVER]	GO:1905819	negative regulation of chromosome separation	BIOLOGICAL_PROCESS	0.0281063	0.00797699	6	1	10010	19226
[OVER]	GO:2000816	negative regulation of mitotic sister chromatid separation	BIOLOGICAL_PROCESS	0.0281063	0.00797699	6	1	10010	19226
[OVER]	GO:0032272	negative regulation of protein polymerization	BIOLOGICAL_PROCESS	0.0281063	0.00797699	6	1	10010	19226
[OVER]	GO:0071941	nitrogen cycle metabolic process	BIOLOGICAL_PROCESS	0.0281063	0.00797699	6	1	10010	19226
[OVER]	GO:1903829	positive regulation of protein localization	BIOLOGICAL_PROCESS	0.0339651	0.00978157	7	2	10009	19225
[OVER]	GO:0006740	NADPH regeneration	BIOLOGICAL_PROCESS	0.0339651	0.00978157	7	2	10009	19225
[OVER]	GO:0016073	snRNA metabolic process	BIOLOGICAL_PROCESS	0.0339651	0.00978157	7	2	10009	19225
[OVER]	GO:0009303	rRNA transcription	BIOLOGICAL_PROCESS	0.0339651	0.00978157	7	2	10009	19225
[OVER]	GO:0034308	primary alcohol metabolic process	BIOLOGICAL_PROCESS	0.0339651	0.00978157	7	2	10009	19225
[OVER]	GO:0032006	regulation of TOR signaling	BIOLOGICAL_PROCESS	0.0339651	0.00978157	7	2	10009	19225
[OVER]	GO:0016973	poly(A)+ mRNA export from nucleus	BIOLOGICAL_PROCESS	0.0339651	0.00978157	7	2	10009	19225
[OVER]	GO:0045454	cell redox homeostasis	BIOLOGICAL_PROCESS	0.0339651	0.00978157	7	2	10009	19225
[OVER]	GO:1904029	regulation of cyclin-dependent protein kinase activity	BIOLOGICAL_PROCESS	0.0339651	0.00978157	7	2	10009	19225
[OVER]	GO:0046417	chorismate metabolic process	BIOLOGICAL_PROCESS	0.0339651	0.00978157	7	2	10009	19225
[OVER]	GO:0000079	regulation of cyclin-dependent protein serine/threonine kinase activity	BIOLOGICAL_PROCESS	0.0339651	0.00978157	7	2	10009	19225
[OVER]	GO:0080134	regulation of response to stress	BIOLOGICAL_PROCESS	0.0339651	0.00978157	7	2	10009	19225
[OVER]	GO:0080135	regulation of cellular response to stress	BIOLOGICAL_PROCESS	0.0339651	0.00978157	7	2	10009	19225
[OVER]	GO:0043173	nucleotide salvage	BIOLOGICAL_PROCESS	0.0339651	0.00978157	7	2	10009	19225
[OVER]	GO:0006098	pentose-phosphate shunt	BIOLOGICAL_PROCESS	0.0339651	0.00978157	7	2	10009	19225
[OVER]	GO:0043086	negative regulation of catalytic activity	BIOLOGICAL_PROCESS	0.0339651	0.00978157	7	2	10009	19225
[OVER]	GO:0022413	reproductive process in single-celled organism	BIOLOGICAL_PROCESS	0.0365625	0.0105804	8	3	10008	19224
[OVER]	GO:0061077	chaperone-mediated protein folding	BIOLOGICAL_PROCESS	0.0365625	0.0105804	8	3	10008	19224
[OVER]	GO:0032511	late endosome to vacuole transport via multivesicular body sorting pathway	BIOLOGICAL_PROCESS	0.0365625	0.0105804	8	3	10008	19224
[OVER]	GO:0046835	carbohydrate phosphorylation	BIOLOGICAL_PROCESS	0.0365625	0.0105804	8	3	10008	19224
[OVER]	GO:0006560	proline metabolic process	BIOLOGICAL_PROCESS	0.0426027	0.0123547	10	5	10006	19222
[OVER]	GO:1901657	glycosyl compound metabolic process	BIOLOGICAL_PROCESS	0.0426027	0.0123547	10	5	10006	19222
[OVER]	GO:0032200	telomere organization	BIOLOGICAL_PROCESS	0.0426027	0.0123547	10	5	10006	19222
[OVER]	GO:0006687	glycosphingolipid metabolic process	BIOLOGICAL_PROCESS	0.0443855	0.0137568	4	0	10012	19227
[OVER]	GO:0006673	inositol phosphoceramide metabolic process	BIOLOGICAL_PROCESS	0.0443855	0.0137568	4	0	10012	19227
[OVER]	GO:0031670	cellular response to nutrient	BIOLOGICAL_PROCESS	0.0443855	0.0137568	4	0	10012	19227
[OVER]	GO:0043574	peroxisomal transport	BIOLOGICAL_PROCESS	0.0443855	0.0137568	4	0	10012	19227
[OVER]	GO:0006772	thiamine metabolic process	BIOLOGICAL_PROCESS	0.0443855	0.0137568	4	0	10012	19227
[OVER]	GO:0006771	riboflavin metabolic process	BIOLOGICAL_PROCESS	0.0443855	0.0137568	4	0	10012	19227
[OVER]	GO:1990961	xenobiotic detoxification by transmembrane export across the plasma membrane	BIOLOGICAL_PROCESS	0.0443855	0.0137568	4	0	10012	19227
[OVER]	GO:0000290	deadenylation-dependent decapping of nuclear-transcribed mRNA	BIOLOGICAL_PROCESS	0.0443855	0.0137568	4	0	10012	19227
[OVER]	GO:0048280	vesicle fusion with Golgi apparatus	BIOLOGICAL_PROCESS	0.0443855	0.0137568	4	0	10012	19227
[OVER]	GO:0006384	transcription initiation at RNA polymerase III promoter	BIOLOGICAL_PROCESS	0.0443855	0.0137568	4	0	10012	19227
[OVER]	GO:0000266	mitochondrial fission	BIOLOGICAL_PROCESS	0.0443855	0.0137568	4	0	10012	19227
[OVER]	GO:0019878	lysine biosynthetic process via aminoadipic acid	BIOLOGICAL_PROCESS	0.0443855	0.0137568	4	0	10012	19227
[OVER]	GO:0006556	S-adenosylmethionine biosynthetic process	BIOLOGICAL_PROCESS	0.0443855	0.0137568	4	0	10012	19227
[OVER]	GO:0044773	mitotic DNA damage checkpoint signaling	BIOLOGICAL_PROCESS	0.0443855	0.0137568	4	0	10012	19227
[OVER]	GO:0000338	protein deneddylation	BIOLOGICAL_PROCESS	0.0443855	0.0137568	4	0	10012	19227
[OVER]	GO:0009231	riboflavin biosynthetic process	BIOLOGICAL_PROCESS	0.0443855	0.0137568	4	0	10012	19227
[OVER]	GO:1902905	positive regulation of supramolecular fiber organization	BIOLOGICAL_PROCESS	0.0443855	0.0137568	4	0	10012	19227
[OVER]	GO:0072698	protein localization to microtubule cytoskeleton	BIOLOGICAL_PROCESS	0.0443855	0.0137568	4	0	10012	19227
[OVER]	GO:0070070	proton-transporting V-type ATPase complex assembly	BIOLOGICAL_PROCESS	0.0443855	0.0137568	4	0	10012	19227
[OVER]	GO:0045048	protein insertion into ER membrane	BIOLOGICAL_PROCESS	0.0443855	0.0137568	4	0	10012	19227
[OVER]	GO:0070072	vacuolar proton-transporting V-type ATPase complex assembly	BIOLOGICAL_PROCESS	0.0443855	0.0137568	4	0	10012	19227
[OVER]	GO:0000959	mitochondrial RNA metabolic process	BIOLOGICAL_PROCESS	0.0443855	0.0137568	4	0	10012	19227
[OVER]	GO:0046373	L-arabinose metabolic process	BIOLOGICAL_PROCESS	0.0443855	0.0137568	4	0	10012	19227
[OVER]	GO:0006829	zinc ion transport	BIOLOGICAL_PROCESS	0.0443855	0.0137568	4	0	10012	19227
[OVER]	GO:0071028	nuclear mRNA surveillance	BIOLOGICAL_PROCESS	0.0443855	0.0137568	4	0	10012	19227
[OVER]	GO:2001252	positive regulation of chromosome organization	BIOLOGICAL_PROCESS	0.0443855	0.0137568	4	0	10012	19227
[OVER]	GO:0072384	organelle transport along microtubule	BIOLOGICAL_PROCESS	0.0443855	0.0137568	4	0	10012	19227
[OVER]	GO:0042454	ribonucleoside catabolic process	BIOLOGICAL_PROCESS	0.0443855	0.0137568	4	0	10012	19227
[OVER]	GO:0006998	nuclear envelope organization	BIOLOGICAL_PROCESS	0.0443855	0.0137568	4	0	10012	19227
[OVER]	GO:0000749	response to pheromone triggering conjugation with cellular fusion	BIOLOGICAL_PROCESS	0.0443855	0.0137568	4	0	10012	19227
[OVER]	GO:0035435	phosphate ion transmembrane transport	BIOLOGICAL_PROCESS	0.0443855	0.0137568	4	0	10012	19227
[OVER]	GO:0009133	nucleoside diphosphate biosynthetic process	BIOLOGICAL_PROCESS	0.0443855	0.0137568	4	0	10012	19227
[OVER]	GO:0006903	vesicle targeting	BIOLOGICAL_PROCESS	0.0443855	0.0137568	4	0	10012	19227
[OVER]	GO:0009719	response to endogenous stimulus	BIOLOGICAL_PROCESS	0.0443855	0.0137568	4	0	10012	19227
[OVER]	GO:0052548	regulation of endopeptidase activity	BIOLOGICAL_PROCESS	0.0443855	0.0137568	4	0	10012	19227
[OVER]	GO:0046618	xenobiotic export from cell	BIOLOGICAL_PROCESS	0.0443855	0.0137568	4	0	10012	19227
[OVER]	GO:0110154	RNA decapping	BIOLOGICAL_PROCESS	0.0443855	0.0137568	4	0	10012	19227
[OVER]	GO:0110156	methylguanosine-cap decapping	BIOLOGICAL_PROCESS	0.0443855	0.0137568	4	0	10012	19227
[OVER]	GO:0007097	nuclear migration	BIOLOGICAL_PROCESS	0.0443855	0.0137568	4	0	10012	19227
[OVER]	GO:0007080	mitotic metaphase plate congression	BIOLOGICAL_PROCESS	0.0443855	0.0137568	4	0	10012	19227
[OVER]	GO:0051315	attachment of mitotic spindle microtubules to kinetochore	BIOLOGICAL_PROCESS	0.0443855	0.0137568	4	0	10012	19227
[OVER]	GO:0008535	respiratory chain complex IV assembly	BIOLOGICAL_PROCESS	0.0443855	0.0137568	4	0	10012	19227
[OVER]	GO:0034728	nucleosome organization	BIOLOGICAL_PROCESS	0.0443855	0.0137568	4	0	10012	19227
[OVER]	GO:0071495	cellular response to endogenous stimulus	BIOLOGICAL_PROCESS	0.0443855	0.0137568	4	0	10012	19227
[OVER]	GO:0070192	chromosome organization involved in meiotic cell cycle	BIOLOGICAL_PROCESS	0.0443855	0.0137568	4	0	10012	19227
[OVER]	GO:0071444	cellular response to pheromone	BIOLOGICAL_PROCESS	0.0443855	0.0137568	4	0	10012	19227
[OVER]	GO:0034427	nuclear-transcribed mRNA catabolic process, exonucleolytic, 3'-5'	BIOLOGICAL_PROCESS	0.0443855	0.0137568	4	0	10012	19227
[OVER]	GO:0008156	negative regulation of DNA replication	BIOLOGICAL_PROCESS	0.0443855	0.0137568	4	0	10012	19227
[OVER]	GO:0046513	ceramide biosynthetic process	BIOLOGICAL_PROCESS	0.0443855	0.0137568	4	0	10012	19227
[OVER]	GO:0051647	nucleus localization	BIOLOGICAL_PROCESS	0.0443855	0.0137568	4	0	10012	19227
[OVER]	GO:1902101	positive regulation of metaphase/anaphase transition of cell cycle	BIOLOGICAL_PROCESS	0.0443855	0.0137568	4	0	10012	19227
[OVER]	GO:0000056	ribosomal small subunit export from nucleus	BIOLOGICAL_PROCESS	0.0443855	0.0137568	4	0	10012	19227
[OVER]	GO:1902117	positive regulation of organelle assembly	BIOLOGICAL_PROCESS	0.0443855	0.0137568	4	0	10012	19227
[OVER]	GO:0019566	arabinose metabolic process	BIOLOGICAL_PROCESS	0.0443855	0.0137568	4	0	10012	19227
[OVER]	GO:0007584	response to nutrient	BIOLOGICAL_PROCESS	0.0443855	0.0137568	4	0	10012	19227
[OVER]	GO:0006166	purine ribonucleoside salvage	BIOLOGICAL_PROCESS	0.0443855	0.0137568	4	0	10012	19227
[OVER]	GO:0006177	GMP biosynthetic process	BIOLOGICAL_PROCESS	0.0443855	0.0137568	4	0	10012	19227
[OVER]	GO:0000028	ribosomal small subunit assembly	BIOLOGICAL_PROCESS	0.0443855	0.0137568	4	0	10012	19227
[OVER]	GO:0043174	nucleoside salvage	BIOLOGICAL_PROCESS	0.0443855	0.0137568	4	0	10012	19227
[OVER]	GO:1904669	ATP export	BIOLOGICAL_PROCESS	0.0443855	0.0137568	4	0	10012	19227
[OVER]	GO:0006272	leading strand elongation	BIOLOGICAL_PROCESS	0.0443855	0.0137568	4	0	10012	19227
[OVER]	GO:0045842	positive regulation of mitotic metaphase/anaphase transition	BIOLOGICAL_PROCESS	0.0443855	0.0137568	4	0	10012	19227
[OVER]	GO:0045840	positive regulation of mitotic nuclear division	BIOLOGICAL_PROCESS	0.0443855	0.0137568	4	0	10012	19227
[OVER]	GO:0070816	phosphorylation of RNA polymerase II C-terminal domain	BIOLOGICAL_PROCESS	0.0443855	0.0137568	4	0	10012	19227
[OVER]	GO:0070813	hydrogen sulfide metabolic process	BIOLOGICAL_PROCESS	0.0443855	0.0137568	4	0	10012	19227
[OVER]	GO:0031297	replication fork processing	BIOLOGICAL_PROCESS	0.0443855	0.0137568	4	0	10012	19227
[OVER]	GO:0033617	mitochondrial cytochrome c oxidase assembly	BIOLOGICAL_PROCESS	0.0443855	0.0137568	4	0	10012	19227
[OVER]	GO:0044208	'de novo' AMP biosynthetic process	BIOLOGICAL_PROCESS	0.0443855	0.0137568	4	0	10012	19227
[OVER]	GO:0019400	alditol metabolic process	BIOLOGICAL_PROCESS	0.0443855	0.0137568	4	0	10012	19227
[OVER]	GO:0006086	acetyl-CoA biosynthetic process from pyruvate	BIOLOGICAL_PROCESS	0.0443855	0.0137568	4	0	10012	19227
[OVER]	GO:0006075	(1->3)-beta-D-glucan biosynthetic process	BIOLOGICAL_PROCESS	0.0443855	0.0137568	4	0	10012	19227
[OVER]	GO:0006074	(1->3)-beta-D-glucan metabolic process	BIOLOGICAL_PROCESS	0.0443855	0.0137568	4	0	10012	19227
[OVER]	GO:2000765	regulation of cytoplasmic translation	BIOLOGICAL_PROCESS	0.0443855	0.0137568	4	0	10012	19227
[OVER]	GO:0031048	RNA-mediated heterochromatin formation	BIOLOGICAL_PROCESS	0.0443855	0.0137568	4	0	10012	19227
[OVER]	GO:0044380	protein localization to cytoskeleton	BIOLOGICAL_PROCESS	0.0443855	0.0137568	4	0	10012	19227
[OVER]	GO:0006743	ubiquinone metabolic process	BIOLOGICAL_PROCESS	0.048209	0.0150238	9	4	10007	19223
[OVER]	GO:0006744	ubiquinone biosynthetic process	BIOLOGICAL_PROCESS	0.048209	0.0150238	9	4	10007	19223
[OVER]	GO:0006874	cellular calcium ion homeostasis	BIOLOGICAL_PROCESS	0.048209	0.0150238	9	4	10007	19223
[OVER]	GO:0003006	developmental process involved in reproduction	BIOLOGICAL_PROCESS	0.048209	0.0150238	9	4	10007	19223
[OVER]	GO:1903008	organelle disassembly	BIOLOGICAL_PROCESS	0.048209	0.0150238	9	4	10007	19223
[OVER]	GO:0055074	calcium ion homeostasis	BIOLOGICAL_PROCESS	0.048209	0.0150238	9	4	10007	19223
[OVER]	GO:0016020	membrane	CELLULAR_COMPONENT	0	0	1813	785	8203	18442
[OVER]	GO:0005622	intracellular anatomical structure	CELLULAR_COMPONENT	0	0	1887	501	8129	18726
[OVER]	GO:0110165	cellular anatomical entity	CELLULAR_COMPONENT	0	0	3272	1223	6744	18004
[OVER]	GO:0043229	intracellular organelle	CELLULAR_COMPONENT	0	0	1596	427	8420	18800
[OVER]	GO:0043226	organelle	CELLULAR_COMPONENT	0	0	1604	428	8412	18799
[OVER]	GO:0043227	membrane-bounded organelle	CELLULAR_COMPONENT	0	0	1365	360	8651	18867
[OVER]	GO:0043231	intracellular membrane-bounded organelle	CELLULAR_COMPONENT	0	0	1359	360	8657	18867
[OVER]	GO:0005737	cytoplasm	CELLULAR_COMPONENT	0	2.86321259055E-312	1189	280	8827	18947
[OVER]	GO:0032991	protein-containing complex	CELLULAR_COMPONENT	1.16905e-238	3.6143e-241	811	139	9205	19088
[OVER]	GO:0005634	nucleus	CELLULAR_COMPONENT	1.08611e-157	6.04419e-160	679	189	9337	19038
[OVER]	GO:0043228	non-membrane-bounded organelle	CELLULAR_COMPONENT	8.23448e-131	5.98269e-133	498	108	9518	19119
[OVER]	GO:0043232	intracellular non-membrane-bounded organelle	CELLULAR_COMPONENT	8.23448e-131	5.98269e-133	498	108	9518	19119
[OVER]	GO:0031090	organelle membrane	CELLULAR_COMPONENT	2.65188e-100	2.41862e-102	379	80	9637	19147
[OVER]	GO:0005739	mitochondrion	CELLULAR_COMPONENT	2.74127e-91	2.79679e-93	335	66	9681	19161
[OVER]	GO:1990904	ribonucleoprotein complex	CELLULAR_COMPONENT	4.90666e-84	5.61282e-86	268	36	9748	19191
[OVER]	GO:1902494	catalytic complex	CELLULAR_COMPONENT	1.7883e-82	2.07331e-84	291	52	9725	19175
[OVER]	GO:0070013	intracellular organelle lumen	CELLULAR_COMPONENT	4.16174e-77	5.66135e-79	263	43	9753	19184
[OVER]	GO:0031974	membrane-enclosed lumen	CELLULAR_COMPONENT	4.16174e-77	5.66135e-79	263	43	9753	19184
[OVER]	GO:0043233	organelle lumen	CELLULAR_COMPONENT	4.16174e-77	5.66135e-79	263	43	9753	19184
[OVER]	GO:0012505	endomembrane system	CELLULAR_COMPONENT	7.67031e-71	1.16199e-72	312	88	9704	19139
[OVER]	GO:0140513	nuclear protein-containing complex	CELLULAR_COMPONENT	1.38615e-63	2.22847e-65	213	33	9803	19194
[OVER]	GO:0031975	envelope	CELLULAR_COMPONENT	5.95859e-52	1.16059e-53	184	33	9832	19194
[OVER]	GO:0031967	organelle envelope	CELLULAR_COMPONENT	5.95859e-52	1.16059e-53	184	33	9832	19194
[OVER]	GO:0031981	nuclear lumen	CELLULAR_COMPONENT	1.48056e-51	2.90664e-53	183	33	9833	19194
[OVER]	GO:0005840	ribosome	CELLULAR_COMPONENT	5.35401e-48	1.10076e-49	137	12	9879	19215
[OVER]	GO:0140535	intracellular protein-containing complex	CELLULAR_COMPONENT	1.13973e-47	2.38589e-49	170	31	9846	19196
[OVER]	GO:0005740	mitochondrial envelope	CELLULAR_COMPONENT	2.09646e-46	4.56951e-48	162	28	9854	19199
[OVER]	GO:0031966	mitochondrial membrane	CELLULAR_COMPONENT	6.65599e-45	1.47134e-46	155	26	9861	19201
[OVER]	GO:0005783	endoplasmic reticulum	CELLULAR_COMPONENT	1.24239e-43	2.9e-45	173	40	9843	19187
[OVER]	GO:0019866	organelle inner membrane	CELLULAR_COMPONENT	1.75001e-40	4.22016e-42	134	20	9882	19207
[OVER]	GO:0005743	mitochondrial inner membrane	CELLULAR_COMPONENT	2.26413e-40	5.49496e-42	132	19	9884	19208
[OVER]	GO:0098796	membrane protein complex	CELLULAR_COMPONENT	8.45549e-40	2.06518e-41	134	21	9882	19206
[OVER]	GO:0005694	chromosome	CELLULAR_COMPONENT	3.23798e-39	8.05866e-41	157	37	9859	19190
[OVER]	GO:1990234	transferase complex	CELLULAR_COMPONENT	1.53952e-37	3.95053e-39	130	22	9886	19205
[OVER]	GO:0005829	cytosol	CELLULAR_COMPONENT	1.64089e-34	4.51505e-36	133	29	9883	19198
[OVER]	GO:0031984	organelle subcompartment	CELLULAR_COMPONENT	3.02044e-31	9.01137e-33	120	26	9896	19201
[OVER]	GO:0098588	bounding membrane of organelle	CELLULAR_COMPONENT	3.44761e-31	1.03391e-32	143	43	9873	19184
[OVER]	GO:0098827	endoplasmic reticulum subcompartment	CELLULAR_COMPONENT	6.83549e-30	2.10274e-31	112	23	9904	19204
[OVER]	GO:0042175	nuclear outer membrane-endoplasmic reticulum membrane network	CELLULAR_COMPONENT	6.83549e-30	2.10274e-31	112	23	9904	19204
[OVER]	GO:0005789	endoplasmic reticulum membrane	CELLULAR_COMPONENT	2.5228e-29	7.99464e-31	109	22	9907	19205
[OVER]	GO:0071944	cell periphery	CELLULAR_COMPONENT	1.67288e-27	5.6116e-29	130	41	9886	19186
[OVER]	GO:0005730	nucleolus	CELLULAR_COMPONENT	8.69279e-26	3.01003e-27	89	15	9927	19212
[OVER]	GO:0098798	mitochondrial protein-containing complex	CELLULAR_COMPONENT	3.05672e-25	1.08679e-26	67	4	9949	19223
[OVER]	GO:0005654	nucleoplasm	CELLULAR_COMPONENT	1.09834e-21	4.38044e-23	63	6	9953	19221
[OVER]	GO:0061695	transferase complex, transferring phosphorus-containing groups	CELLULAR_COMPONENT	2.40407e-21	9.62521e-23	66	8	9950	19219
[OVER]	GO:0044391	ribosomal subunit	CELLULAR_COMPONENT	6.73042e-21	2.74669e-22	57	4	9959	19223
[OVER]	GO:0005759	mitochondrial matrix	CELLULAR_COMPONENT	7.54513e-21	3.1025e-22	59	5	9957	19222
[OVER]	GO:0000785	chromatin	CELLULAR_COMPONENT	4.3353e-17	2.0105e-18	72	19	9944	19208
[OVER]	GO:0005794	Golgi apparatus	CELLULAR_COMPONENT	2.76074e-16	1.3315e-17	91	36	9925	19191
[OVER]	GO:0005856	cytoskeleton	CELLULAR_COMPONENT	1.17985e-15	5.92751e-17	92	39	9924	19188
[OVER]	GO:0005886	plasma membrane	CELLULAR_COMPONENT	1.21108e-15	6.10314e-17	76	25	9940	19202
[OVER]	GO:0000428	DNA-directed RNA polymerase complex	CELLULAR_COMPONENT	4.78807e-15	2.47212e-16	39	2	9977	19225
[OVER]	GO:0030880	RNA polymerase complex	CELLULAR_COMPONENT	4.78807e-15	2.47212e-16	39	2	9977	19225
[OVER]	GO:0005773	vacuole	CELLULAR_COMPONENT	6.15362e-15	3.2057e-16	71	23	9945	19204
[OVER]	GO:0005938	cell cortex	CELLULAR_COMPONENT	8.20114e-15	4.31038e-16	53	10	9963	19217
[OVER]	GO:1905368	peptidase complex	CELLULAR_COMPONENT	2.38435e-14	1.29003e-15	47	7	9969	19220
[OVER]	GO:0031410	cytoplasmic vesicle	CELLULAR_COMPONENT	6.35719e-14	3.5476e-15	80	33	9936	19194
[OVER]	GO:0097708	intracellular vesicle	CELLULAR_COMPONENT	6.35719e-14	3.5476e-15	80	33	9936	19194
[OVER]	GO:0031982	vesicle	CELLULAR_COMPONENT	6.35719e-14	3.5476e-15	80	33	9936	19194
[OVER]	GO:0005681	spliceosomal complex	CELLULAR_COMPONENT	7.22918e-14	4.05657e-15	52	11	9964	19216
[OVER]	GO:0098800	inner mitochondrial membrane protein complex	CELLULAR_COMPONENT	9.46083e-14	5.32345e-15	36	2	9980	19225
[OVER]	GO:1905369	endopeptidase complex	CELLULAR_COMPONENT	1.10709e-13	6.28076e-15	38	3	9978	19224
[OVER]	GO:0000228	nuclear chromosome	CELLULAR_COMPONENT	6.30008e-13	3.70077e-14	45	8	9971	19219
[OVER]	GO:0000502	proteasome complex	CELLULAR_COMPONENT	6.92816e-13	4.09114e-14	34	2	9982	19225
[OVER]	GO:0055029	nuclear DNA-directed RNA polymerase complex	CELLULAR_COMPONENT	3.55859e-12	2.2114e-13	30	1	9986	19226
[OVER]	GO:0099080	supramolecular complex	CELLULAR_COMPONENT	6.05198e-12	3.80763e-13	55	17	9961	19210
[OVER]	GO:0005774	vacuolar membrane	CELLULAR_COMPONENT	6.64279e-12	4.18961e-13	54	16	9962	19211
[OVER]	GO:0015934	large ribosomal subunit	CELLULAR_COMPONENT	1.3948e-11	9.07732e-13	33	3	9983	19224
[OVER]	GO:0005576	extracellular region	CELLULAR_COMPONENT	2.58547e-11	1.70821e-12	68	30	9948	19197
[OVER]	GO:0032153	cell division site	CELLULAR_COMPONENT	9.43034e-11	6.50167e-12	29	2	9987	19225
[OVER]	GO:0012506	vesicle membrane	CELLULAR_COMPONENT	1.08694e-10	7.57781e-12	46	13	9970	19214
[OVER]	GO:0030659	cytoplasmic vesicle membrane	CELLULAR_COMPONENT	1.08694e-10	7.57781e-12	46	13	9970	19214
[OVER]	GO:0098687	chromosomal region	CELLULAR_COMPONENT	1.91849e-10	1.35234e-11	44	12	9972	19215
[OVER]	GO:0070469	respirasome	CELLULAR_COMPONENT	1.9957e-10	1.41294e-11	26	1	9990	19226
[OVER]	GO:0015935	small ribosomal subunit	CELLULAR_COMPONENT	5.51565e-10	3.98177e-11	25	1	9991	19226
[OVER]	GO:0016469	proton-transporting two-sector ATPase complex	CELLULAR_COMPONENT	6.71435e-10	4.86788e-11	27	2	9989	19225
[OVER]	GO:0016591	RNA polymerase II, holoenzyme	CELLULAR_COMPONENT	7.8346e-10	5.70428e-11	22	0	9994	19227
[OVER]	GO:0030684	preribosome	CELLULAR_COMPONENT	1.59797e-09	1.1931e-10	36	8	9980	19219
[OVER]	GO:0120114	Sm-like protein family complex	CELLULAR_COMPONENT	2.38494e-09	1.84336e-10	31	5	9985	19222
[OVER]	GO:0030532	small nuclear ribonucleoprotein complex	CELLULAR_COMPONENT	5.9519e-09	4.65553e-10	30	5	9986	19222
[OVER]	GO:0030863	cortical cytoskeleton	CELLULAR_COMPONENT	1.06103e-08	8.61096e-10	26	3	9990	19224
[OVER]	GO:0022626	cytosolic ribosome	CELLULAR_COMPONENT	1.06103e-08	8.61096e-10	26	3	9990	19224
[OVER]	GO:1990204	oxidoreductase complex	CELLULAR_COMPONENT	1.19687e-08	9.78738e-10	24	2	9992	19225
[OVER]	GO:0030135	coated vesicle	CELLULAR_COMPONENT	1.40258e-08	1.14912e-09	32	7	9984	19220
[OVER]	GO:0097525	spliceosomal snRNP complex	CELLULAR_COMPONENT	1.42599e-08	1.17051e-09	29	5	9987	19222
[OVER]	GO:0015629	actin cytoskeleton	CELLULAR_COMPONENT	1.96814e-08	1.62769e-09	33	8	9983	19219
[OVER]	GO:0030427	site of polarized growth	CELLULAR_COMPONENT	2.68071e-08	2.26258e-09	25	3	9991	19224
[OVER]	GO:0030864	cortical actin cytoskeleton	CELLULAR_COMPONENT	2.68071e-08	2.26258e-09	25	3	9991	19224
[OVER]	GO:0140534	endoplasmic reticulum protein-containing complex	CELLULAR_COMPONENT	3.40776e-08	2.92891e-09	28	5	9988	19222
[OVER]	GO:0000139	Golgi membrane	CELLULAR_COMPONENT	6.19978e-08	5.46279e-09	38	13	9978	19214
[OVER]	GO:0000324	fungal-type vacuole	CELLULAR_COMPONENT	7.25259e-08	6.4465e-09	34	10	9982	19217
[OVER]	GO:0000322	storage vacuole	CELLULAR_COMPONENT	7.25259e-08	6.4465e-09	34	10	9982	19217
[OVER]	GO:0015630	microtubule cytoskeleton	CELLULAR_COMPONENT	1.14836e-07	1.05978e-08	44	19	9972	19208
[OVER]	GO:0000313	organellar ribosome	CELLULAR_COMPONENT	1.29992e-07	1.21773e-08	17	0	9999	19227
[OVER]	GO:0005761	mitochondrial ribosome	CELLULAR_COMPONENT	1.29992e-07	1.21773e-08	17	0	9999	19227
[OVER]	GO:0000323	lytic vacuole	CELLULAR_COMPONENT	2.49637e-07	2.39257e-08	34	11	9982	19216
[OVER]	GO:0032993	protein-DNA complex	CELLULAR_COMPONENT	2.88501e-07	2.78734e-08	24	4	9992	19223
[OVER]	GO:0098803	respiratory chain complex	CELLULAR_COMPONENT	3.67201e-07	3.55906e-08	16	0	10000	19227
[OVER]	GO:1990351	transporter complex	CELLULAR_COMPONENT	3.67201e-07	3.55906e-08	16	0	10000	19227
[OVER]	GO:1902911	protein kinase complex	CELLULAR_COMPONENT	4.10924e-07	4.00189e-08	22	3	9994	19224
[OVER]	GO:0000775	chromosome, centromeric region	CELLULAR_COMPONENT	4.98281e-07	4.89885e-08	29	8	9987	19219
[OVER]	GO:0060187	cell pole	CELLULAR_COMPONENT	5.16959e-07	5.12244e-08	20	2	9996	19225
[OVER]	GO:0051286	cell tip	CELLULAR_COMPONENT	5.16959e-07	5.12244e-08	20	2	9996	19225
[OVER]	GO:0005768	endosome	CELLULAR_COMPONENT	5.28287e-07	5.24286e-08	40	17	9976	19210
[OVER]	GO:0090575	RNA polymerase II transcription regulator complex	CELLULAR_COMPONENT	5.38271e-07	5.35026e-08	18	1	9998	19226
[OVER]	GO:0048475	coated membrane	CELLULAR_COMPONENT	8.71417e-07	8.78287e-08	27	7	9989	19220
[OVER]	GO:0030117	membrane coat	CELLULAR_COMPONENT	8.71417e-07	8.78287e-08	27	7	9989	19220
[OVER]	GO:1902554	serine/threonine protein kinase complex	CELLULAR_COMPONENT	1.01071e-06	1.03274e-07	21	3	9995	19224
[OVER]	GO:0005667	transcription regulator complex	CELLULAR_COMPONENT	1.01071e-06	1.03274e-07	21	3	9995	19224
[OVER]	GO:0005746	mitochondrial respirasome	CELLULAR_COMPONENT	1.01335e-06	1.04014e-07	15	0	10001	19227
[OVER]	GO:0005839	proteasome core complex	CELLULAR_COMPONENT	1.01335e-06	1.04014e-07	15	0	10001	19227
[OVER]	GO:0005777	peroxisome	CELLULAR_COMPONENT	1.03772e-06	1.08761e-07	24	5	9992	19222
[OVER]	GO:0042579	microbody	CELLULAR_COMPONENT	1.03772e-06	1.08761e-07	24	5	9992	19222
[OVER]	GO:0005635	nuclear envelope	CELLULAR_COMPONENT	2.41846e-06	2.64351e-07	23	5	9993	19222
[OVER]	GO:0032040	small-subunit processome	CELLULAR_COMPONENT	2.41846e-06	2.65062e-07	20	3	9996	19224
[OVER]	GO:0034515	proteasome storage granule	CELLULAR_COMPONENT	2.7501e-06	3.03961e-07	14	0	10002	19227
[OVER]	GO:0030662	coated vesicle membrane	CELLULAR_COMPONENT	3.28839e-06	3.65998e-07	24	6	9992	19221
[OVER]	GO:0005657	replication fork	CELLULAR_COMPONENT	3.82661e-06	4.35366e-07	21	4	9995	19223
[OVER]	GO:1904949	ATPase complex	CELLULAR_COMPONENT	5.74117e-06	6.76267e-07	19	3	9997	19224
[OVER]	GO:1902495	transmembrane transporter complex	CELLULAR_COMPONENT	7.44279e-06	8.88211e-07	13	0	10003	19227
[OVER]	GO:0016471	vacuolar proton-transporting V-type ATPase complex	CELLULAR_COMPONENT	7.44279e-06	8.88211e-07	13	0	10003	19227
[OVER]	GO:0000776	kinetochore	CELLULAR_COMPONENT	7.92811e-06	9.54707e-07	17	2	9999	19225
[OVER]	GO:0005933	cellular bud	CELLULAR_COMPONENT	7.92811e-06	9.54707e-07	17	2	9999	19225
[OVER]	GO:0000151	ubiquitin ligase complex	CELLULAR_COMPONENT	7.92811e-06	9.54707e-07	17	2	9999	19225
[OVER]	GO:0000793	condensed chromosome	CELLULAR_COMPONENT	1.22623e-05	1.52781e-06	21	5	9995	19222
[OVER]	GO:0061645	endocytic patch	CELLULAR_COMPONENT	1.36904e-05	1.7142e-06	18	3	9998	19224
[OVER]	GO:0030479	actin cortical patch	CELLULAR_COMPONENT	1.36904e-05	1.7142e-06	18	3	9998	19224
[OVER]	GO:0030134	COPII-coated ER to Golgi transport vesicle	CELLULAR_COMPONENT	1.94762e-05	2.5049e-06	16	2	10000	19225
[OVER]	GO:0005838	proteasome regulatory particle	CELLULAR_COMPONENT	1.94762e-05	2.5049e-06	16	2	10000	19225
[OVER]	GO:0022624	proteasome accessory complex	CELLULAR_COMPONENT	1.94762e-05	2.5049e-06	16	2	10000	19225
[OVER]	GO:0033176	proton-transporting V-type ATPase complex	CELLULAR_COMPONENT	2.35619e-05	3.10322e-06	14	1	10002	19226
[OVER]	GO:0030120	vesicle coat	CELLULAR_COMPONENT	2.7326e-05	3.62854e-06	20	5	9996	19222
[OVER]	GO:0010008	endosome membrane	CELLULAR_COMPONENT	2.7326e-05	3.62854e-06	20	5	9996	19222
[OVER]	GO:0043596	nuclear replication fork	CELLULAR_COMPONENT	3.21529e-05	4.31423e-06	17	3	9999	19224
[OVER]	GO:0000779	condensed chromosome, centromeric region	CELLULAR_COMPONENT	3.21529e-05	4.31423e-06	17	3	9999	19224
[OVER]	GO:0070603	SWI/SNF superfamily-type complex	CELLULAR_COMPONENT	3.21529e-05	4.31423e-06	17	3	9999	19224
[OVER]	GO:1902493	acetyltransferase complex	CELLULAR_COMPONENT	3.44391e-05	4.64227e-06	21	6	9995	19221
[OVER]	GO:0031248	protein acetyltransferase complex	CELLULAR_COMPONENT	3.44391e-05	4.64227e-06	21	6	9995	19221
[OVER]	GO:0070069	cytochrome complex	CELLULAR_COMPONENT	5.45032e-05	7.58276e-06	11	0	10005	19227
[OVER]	GO:0044815	DNA packaging complex	CELLULAR_COMPONENT	5.97816e-05	8.48346e-06	13	1	10003	19226
[OVER]	GO:0031461	cullin-RING ubiquitin ligase complex	CELLULAR_COMPONENT	5.97816e-05	8.48346e-06	13	1	10003	19226
[OVER]	GO:0005684	U2-type spliceosomal complex	CELLULAR_COMPONENT	5.97816e-05	8.48346e-06	13	1	10003	19226
[OVER]	GO:0033178	proton-transporting two-sector ATPase complex, catalytic domain	CELLULAR_COMPONENT	5.97816e-05	8.48346e-06	13	1	10003	19226
[OVER]	GO:0033177	proton-transporting two-sector ATPase complex, proton-transporting domain	CELLULAR_COMPONENT	5.97816e-05	8.48346e-06	13	1	10003	19226
[OVER]	GO:0045259	proton-transporting ATP synthase complex	CELLULAR_COMPONENT	5.97816e-05	8.48346e-06	13	1	10003	19226
[OVER]	GO:0019867	outer membrane	CELLULAR_COMPONENT	5.99864e-05	8.54035e-06	19	5	9997	19222
[OVER]	GO:0099081	supramolecular polymer	CELLULAR_COMPONENT	6.82821e-05	9.76363e-06	28	13	9988	19214
[OVER]	GO:0099512	supramolecular fiber	CELLULAR_COMPONENT	6.82821e-05	9.76363e-06	28	13	9988	19214
[OVER]	GO:0019898	extrinsic component of membrane	CELLULAR_COMPONENT	0.000115049	1.69132e-05	14	2	10002	19225
[OVER]	GO:0022625	cytosolic large ribosomal subunit	CELLULAR_COMPONENT	0.000115049	1.69132e-05	14	2	10002	19225
[OVER]	GO:0000315	organellar large ribosomal subunit	CELLULAR_COMPONENT	0.000147136	2.21534e-05	10	0	10006	19227
[OVER]	GO:0005762	mitochondrial large ribosomal subunit	CELLULAR_COMPONENT	0.000147136	2.21534e-05	10	0	10006	19227
[OVER]	GO:0036464	cytoplasmic ribonucleoprotein granule	CELLULAR_COMPONENT	0.000150359	2.30803e-05	12	1	10004	19226
[OVER]	GO:0035770	ribonucleoprotein granule	CELLULAR_COMPONENT	0.000150359	2.30803e-05	12	1	10004	19226
[OVER]	GO:0005935	cellular bud neck	CELLULAR_COMPONENT	0.000150359	2.30803e-05	12	1	10004	19226
[OVER]	GO:0030133	transport vesicle	CELLULAR_COMPONENT	0.000156808	2.40944e-05	19	6	9997	19221
[OVER]	GO:0070993	translation preinitiation complex	CELLULAR_COMPONENT	0.000171295	2.66648e-05	15	3	10001	19224
[OVER]	GO:0030658	transport vesicle membrane	CELLULAR_COMPONENT	0.000171295	2.66648e-05	15	3	10001	19224
[OVER]	GO:0033290	eukaryotic 48S preinitiation complex	CELLULAR_COMPONENT	0.000171295	2.66648e-05	15	3	10001	19224
[OVER]	GO:0099513	polymeric cytoskeletal fiber	CELLULAR_COMPONENT	0.000193666	3.01771e-05	27	13	9989	19214
[OVER]	GO:0098852	lytic vacuole membrane	CELLULAR_COMPONENT	0.000253237	3.97726e-05	20	7	9996	19220
[OVER]	GO:0000329	fungal-type vacuole membrane	CELLULAR_COMPONENT	0.000253237	3.97726e-05	20	7	9996	19220
[OVER]	GO:0097346	INO80-type complex	CELLULAR_COMPONENT	0.000273188	4.3455e-05	13	2	10003	19225
[OVER]	GO:0005741	mitochondrial outer membrane	CELLULAR_COMPONENT	0.000287128	4.58944e-05	17	5	9999	19222
[OVER]	GO:0031968	organelle outer membrane	CELLULAR_COMPONENT	0.000287128	4.58944e-05	17	5	9999	19222
[OVER]	GO:0022627	cytosolic small ribosomal subunit	CELLULAR_COMPONENT	0.000385455	6.2445e-05	11	1	10005	19226
[OVER]	GO:0042995	cell projection	CELLULAR_COMPONENT	0.000385455	6.2445e-05	11	1	10005	19226
[OVER]	GO:0099568	cytoplasmic region	CELLULAR_COMPONENT	0.000385455	6.2445e-05	11	1	10005	19226
[OVER]	GO:0099738	cell cortex region	CELLULAR_COMPONENT	0.000385455	6.2445e-05	11	1	10005	19226
[OVER]	GO:0097526	spliceosomal tri-snRNP complex	CELLULAR_COMPONENT	0.000392228	6.53612e-05	14	3	10002	19224
[OVER]	GO:0005852	eukaryotic translation initiation factor 3 complex	CELLULAR_COMPONENT	0.000392228	6.53612e-05	14	3	10002	19224
[OVER]	GO:0016282	eukaryotic 43S preinitiation complex	CELLULAR_COMPONENT	0.000392228	6.53612e-05	14	3	10002	19224
[OVER]	GO:0008541	proteasome regulatory particle, lid subcomplex	CELLULAR_COMPONENT	0.000392228	6.4718e-05	9	0	10007	19227
[OVER]	GO:0046540	U4/U6 x U5 tri-snRNP complex	CELLULAR_COMPONENT	0.000392228	6.53612e-05	14	3	10002	19224
[OVER]	GO:0005815	microtubule organizing center	CELLULAR_COMPONENT	0.000511944	8.62605e-05	15	4	10001	19223
[OVER]	GO:0000123	histone acetyltransferase complex	CELLULAR_COMPONENT	0.000568882	9.6382e-05	18	6	9998	19221
[OVER]	GO:0005758	mitochondrial intermembrane space	CELLULAR_COMPONENT	0.000644344	0.000110661	12	2	10004	19225
[OVER]	GO:0030660	Golgi-associated vesicle membrane	CELLULAR_COMPONENT	0.000644344	0.000110661	12	2	10004	19225
[OVER]	GO:0031970	organelle envelope lumen	CELLULAR_COMPONENT	0.000644344	0.000110661	12	2	10004	19225
[OVER]	GO:0005874	microtubule	CELLULAR_COMPONENT	0.000727254	0.000125013	24	12	9992	19215
[OVER]	GO:0005798	Golgi-associated vesicle	CELLULAR_COMPONENT	0.00090239	0.00015847	13	3	10003	19224
[OVER]	GO:0071014	post-mRNA release spliceosomal complex	CELLULAR_COMPONENT	0.00090239	0.00015847	13	3	10003	19224
[OVER]	GO:0030686	90S preribosome	CELLULAR_COMPONENT	0.00090239	0.00015847	13	3	10003	19224
[OVER]	GO:0099023	vesicle tethering complex	CELLULAR_COMPONENT	0.00090239	0.000158745	18	7	9998	19220
[OVER]	GO:0101031	chaperone complex	CELLULAR_COMPONENT	0.000936108	0.00016786	10	1	10006	19226
[OVER]	GO:0120025	plasma membrane bounded cell projection	CELLULAR_COMPONENT	0.000936108	0.00016786	10	1	10006	19226
[OVER]	GO:0009295	nucleoid	CELLULAR_COMPONENT	0.000936108	0.00016786	10	1	10006	19226
[OVER]	GO:0042645	mitochondrial nucleoid	CELLULAR_COMPONENT	0.000936108	0.00016786	10	1	10006	19226
[OVER]	GO:0005937	mating projection	CELLULAR_COMPONENT	0.000936108	0.00016786	10	1	10006	19226
[OVER]	GO:0031261	DNA replication preinitiation complex	CELLULAR_COMPONENT	0.000936108	0.00016786	10	1	10006	19226
[OVER]	GO:0000118	histone deacetylase complex	CELLULAR_COMPONENT	0.000936108	0.00016786	10	1	10006	19226
[OVER]	GO:1902562	H4 histone acetyltransferase complex	CELLULAR_COMPONENT	0.00102255	0.000189052	8	0	10008	19227
[OVER]	GO:0035267	NuA4 histone acetyltransferase complex	CELLULAR_COMPONENT	0.00102255	0.000189052	8	0	10008	19227
[OVER]	GO:0005744	TIM23 mitochondrial import inner membrane translocase complex	CELLULAR_COMPONENT	0.00102255	0.000189052	8	0	10008	19227
[OVER]	GO:0071010	prespliceosome	CELLULAR_COMPONENT	0.00102255	0.000189052	8	0	10008	19227
[OVER]	GO:0071004	U2-type prespliceosome	CELLULAR_COMPONENT	0.00102255	0.000189052	8	0	10008	19227
[OVER]	GO:0005665	RNA polymerase II, core complex	CELLULAR_COMPONENT	0.00102255	0.000189052	8	0	10008	19227
[OVER]	GO:0043189	H4/H2A histone acetyltransferase complex	CELLULAR_COMPONENT	0.00102255	0.000189052	8	0	10008	19227
[OVER]	GO:0031097	medial cortex	CELLULAR_COMPONENT	0.00102255	0.000189052	8	0	10008	19227
[OVER]	GO:0000781	chromosome, telomeric region	CELLULAR_COMPONENT	0.00108157	0.000200799	14	4	10002	19223
[OVER]	GO:0005643	nuclear pore	CELLULAR_COMPONENT	0.00148155	0.000278951	11	2	10005	19225
[OVER]	GO:1905354	exoribonuclease complex	CELLULAR_COMPONENT	0.00148155	0.000278951	11	2	10005	19225
[OVER]	GO:0000178	exosome (RNase complex)	CELLULAR_COMPONENT	0.00148155	0.000278951	11	2	10005	19225
[OVER]	GO:0031011	Ino80 complex	CELLULAR_COMPONENT	0.00148155	0.000278951	11	2	10005	19225
[OVER]	GO:0005819	spindle	CELLULAR_COMPONENT	0.00189996	0.000359198	16	6	10000	19221
[OVER]	GO:0098797	plasma membrane protein complex	CELLULAR_COMPONENT	0.00199099	0.000379485	12	3	10004	19224
[OVER]	GO:0005753	mitochondrial proton-transporting ATP synthase complex	CELLULAR_COMPONENT	0.0022936	0.000447799	9	1	10007	19226
[OVER]	GO:0005732	sno(s)RNA-containing ribonucleoprotein complex	CELLULAR_COMPONENT	0.0022936	0.000447799	9	1	10007	19226
[OVER]	GO:0005686	U2 snRNP	CELLULAR_COMPONENT	0.0022936	0.000447799	9	1	10007	19226
[OVER]	GO:0090734	site of DNA damage	CELLULAR_COMPONENT	0.0022936	0.000447799	9	1	10007	19226
[OVER]	GO:0035861	site of double-strand break	CELLULAR_COMPONENT	0.0022936	0.000447799	9	1	10007	19226
[OVER]	GO:0000152	nuclear ubiquitin ligase complex	CELLULAR_COMPONENT	0.0022936	0.000447799	9	1	10007	19226
[OVER]	GO:0005816	spindle pole body	CELLULAR_COMPONENT	0.00234671	0.000461072	13	4	10003	19223
[OVER]	GO:0019773	proteasome core complex, alpha-subunit complex	CELLULAR_COMPONENT	0.00273948	0.000552215	7	0	10009	19227
[OVER]	GO:0032806	carboxy-terminal domain protein kinase complex	CELLULAR_COMPONENT	0.00273948	0.000552215	7	0	10009	19227
[OVER]	GO:0000314	organellar small ribosomal subunit	CELLULAR_COMPONENT	0.00273948	0.000552215	7	0	10009	19227
[OVER]	GO:0005763	mitochondrial small ribosomal subunit	CELLULAR_COMPONENT	0.00273948	0.000552215	7	0	10009	19227
[OVER]	GO:0000940	outer kinetochore	CELLULAR_COMPONENT	0.00273948	0.000552215	7	0	10009	19227
[OVER]	GO:0000812	Swr1 complex	CELLULAR_COMPONENT	0.00273948	0.000552215	7	0	10009	19227
[OVER]	GO:0000792	heterochromatin	CELLULAR_COMPONENT	0.00273948	0.000552215	7	0	10009	19227
[OVER]	GO:0005934	cellular bud tip	CELLULAR_COMPONENT	0.00339541	0.000694934	10	2	10006	19225
[OVER]	GO:0030119	AP-type membrane coat adaptor complex	CELLULAR_COMPONENT	0.00431594	0.000896014	11	3	10005	19224
[OVER]	GO:0030687	preribosome, large subunit precursor	CELLULAR_COMPONENT	0.00496257	0.00104253	12	4	10004	19223
[OVER]	GO:0043332	mating projection tip	CELLULAR_COMPONENT	0.00551296	0.00118372	8	1	10008	19226
[OVER]	GO:0005832	chaperonin-containing T-complex	CELLULAR_COMPONENT	0.00551296	0.00118372	8	1	10008	19226
[OVER]	GO:0071013	catalytic step 2 spliceosome	CELLULAR_COMPONENT	0.00551296	0.00118372	8	1	10008	19226
[OVER]	GO:0005680	anaphase-promoting complex	CELLULAR_COMPONENT	0.00551296	0.00118372	8	1	10008	19226
[OVER]	GO:0000439	transcription factor TFIIH core complex	CELLULAR_COMPONENT	0.00709302	0.0016129	6	0	10010	19227
[OVER]	GO:0019774	proteasome core complex, beta-subunit complex	CELLULAR_COMPONENT	0.00709302	0.0016129	6	0	10010	19227
[OVER]	GO:0000221	vacuolar proton-transporting V-type ATPase, V1 domain	CELLULAR_COMPONENT	0.00709302	0.0016129	6	0	10010	19227
[OVER]	GO:0000220	vacuolar proton-transporting V-type ATPase, V0 domain	CELLULAR_COMPONENT	0.00709302	0.0016129	6	0	10010	19227
[OVER]	GO:0005793	endoplasmic reticulum-Golgi intermediate compartment	CELLULAR_COMPONENT	0.00709302	0.0016129	6	0	10010	19227
[OVER]	GO:0000932	P-body	CELLULAR_COMPONENT	0.00709302	0.0016129	6	0	10010	19227
[OVER]	GO:0005844	polysome	CELLULAR_COMPONENT	0.00709302	0.0016129	6	0	10010	19227
[OVER]	GO:0008023	transcription elongation factor complex	CELLULAR_COMPONENT	0.00709302	0.0016129	6	0	10010	19227
[OVER]	GO:0016272	prefoldin complex	CELLULAR_COMPONENT	0.00709302	0.0016129	6	0	10010	19227
[OVER]	GO:0005675	transcription factor TFIIH holo complex	CELLULAR_COMPONENT	0.00709302	0.0016129	6	0	10010	19227
[OVER]	GO:0005685	U1 snRNP	CELLULAR_COMPONENT	0.00709302	0.0016129	6	0	10010	19227
[OVER]	GO:0032156	septin cytoskeleton	CELLULAR_COMPONENT	0.00709302	0.0016129	6	0	10010	19227
[OVER]	GO:0008180	COP9 signalosome	CELLULAR_COMPONENT	0.00709302	0.0016129	6	0	10010	19227
[OVER]	GO:0033179	proton-transporting V-type ATPase, V0 domain	CELLULAR_COMPONENT	0.00709302	0.0016129	6	0	10010	19227
[OVER]	GO:0045261	proton-transporting ATP synthase complex, catalytic core F(1)	CELLULAR_COMPONENT	0.00709302	0.0016129	6	0	10010	19227
[OVER]	GO:0045277	respiratory chain complex IV	CELLULAR_COMPONENT	0.00709302	0.0016129	6	0	10010	19227
[OVER]	GO:0031314	extrinsic component of mitochondrial inner membrane	CELLULAR_COMPONENT	0.00709302	0.0016129	6	0	10010	19227
[OVER]	GO:0031312	extrinsic component of organelle membrane	CELLULAR_COMPONENT	0.00709302	0.0016129	6	0	10010	19227
[OVER]	GO:0000407	phagophore assembly site	CELLULAR_COMPONENT	0.00739851	0.00170753	9	2	10007	19225
[OVER]	GO:0012507	ER to Golgi transport vesicle membrane	CELLULAR_COMPONENT	0.00739851	0.00170753	9	2	10007	19225
[OVER]	GO:0034708	methyltransferase complex	CELLULAR_COMPONENT	0.00739851	0.00170753	9	2	10007	19225
[OVER]	GO:0008287	protein serine/threonine phosphatase complex	CELLULAR_COMPONENT	0.00739851	0.00170753	9	2	10007	19225
[OVER]	GO:0000176	nuclear exosome (RNase complex)	CELLULAR_COMPONENT	0.00739851	0.00170753	9	2	10007	19225
[OVER]	GO:1903293	phosphatase complex	CELLULAR_COMPONENT	0.00739851	0.00170753	9	2	10007	19225
[OVER]	GO:0030118	clathrin coat	CELLULAR_COMPONENT	0.00887641	0.00208154	10	3	10006	19224
[OVER]	GO:0070938	contractile ring	CELLULAR_COMPONENT	0.0126452	0.00309435	7	1	10009	19226
[OVER]	GO:0005885	Arp2/3 protein complex	CELLULAR_COMPONENT	0.0126452	0.00309435	7	1	10009	19226
[OVER]	GO:0005826	actomyosin contractile ring	CELLULAR_COMPONENT	0.0126452	0.00309435	7	1	10009	19226
[OVER]	GO:0051285	cell cortex of cell tip	CELLULAR_COMPONENT	0.0126452	0.00309435	7	1	10009	19226
[OVER]	GO:0110085	mitotic actomyosin contractile ring	CELLULAR_COMPONENT	0.0126452	0.00309435	7	1	10009	19226
[OVER]	GO:0033180	proton-transporting V-type ATPase, V1 domain	CELLULAR_COMPONENT	0.0126452	0.00309435	7	1	10009	19226
[OVER]	GO:0045263	proton-transporting ATP synthase complex, coupling factor F(o)	CELLULAR_COMPONENT	0.0126452	0.00309435	7	1	10009	19226
[OVER]	GO:0044732	mitotic spindle pole body	CELLULAR_COMPONENT	0.0165532	0.00412741	8	2	10008	19225
[OVER]	GO:0030131	clathrin adaptor complex	CELLULAR_COMPONENT	0.0165532	0.00412741	8	2	10008	19225
[OVER]	GO:1902555	endoribonuclease complex	CELLULAR_COMPONENT	0.017693	0.00471061	5	0	10011	19227
[OVER]	GO:0098791	Golgi apparatus subcompartment	CELLULAR_COMPONENT	0.017693	0.0047453	9	3	10007	19224
[OVER]	GO:0030125	clathrin vesicle coat	CELLULAR_COMPONENT	0.017693	0.0047453	9	3	10007	19224
[OVER]	GO:0005750	mitochondrial respiratory chain complex III	CELLULAR_COMPONENT	0.017693	0.00471061	5	0	10011	19227
[OVER]	GO:0005751	mitochondrial respiratory chain complex IV	CELLULAR_COMPONENT	0.017693	0.00471061	5	0	10011	19227
[OVER]	GO:0005747	mitochondrial respiratory chain complex I	CELLULAR_COMPONENT	0.017693	0.00471061	5	0	10011	19227
[OVER]	GO:0005775	vacuolar lumen	CELLULAR_COMPONENT	0.017693	0.00471061	5	0	10011	19227
[OVER]	GO:0005778	peroxisomal membrane	CELLULAR_COMPONENT	0.017693	0.00471061	5	0	10011	19227
[OVER]	GO:0031903	microbody membrane	CELLULAR_COMPONENT	0.017693	0.00471061	5	0	10011	19227
[OVER]	GO:0030665	clathrin-coated vesicle membrane	CELLULAR_COMPONENT	0.017693	0.0047453	9	3	10007	19224
[OVER]	GO:0030688	preribosome, small subunit precursor	CELLULAR_COMPONENT	0.017693	0.00471061	5	0	10011	19227
[OVER]	GO:0030964	NADH dehydrogenase complex	CELLULAR_COMPONENT	0.017693	0.00471061	5	0	10011	19227
[OVER]	GO:1905348	endonuclease complex	CELLULAR_COMPONENT	0.017693	0.00471061	5	0	10011	19227
[OVER]	GO:1905360	GTPase complex	CELLULAR_COMPONENT	0.017693	0.00471061	5	0	10011	19227
[OVER]	GO:0045271	respiratory chain complex I	CELLULAR_COMPONENT	0.017693	0.00471061	5	0	10011	19227
[OVER]	GO:0045275	respiratory chain complex III	CELLULAR_COMPONENT	0.017693	0.00471061	5	0	10011	19227
[OVER]	GO:0031201	SNARE complex	CELLULAR_COMPONENT	0.017693	0.00471061	5	0	10011	19227
[OVER]	GO:0012510	trans-Golgi network transport vesicle membrane	CELLULAR_COMPONENT	0.0281063	0.00797699	6	1	10010	19226
[OVER]	GO:0036387	pre-replicative complex	CELLULAR_COMPONENT	0.0281063	0.00797699	6	1	10010	19226
[OVER]	GO:0030136	clathrin-coated vesicle	CELLULAR_COMPONENT	0.0281063	0.00786213	10	4	10006	19223
[OVER]	GO:0030137	COPI-coated vesicle	CELLULAR_COMPONENT	0.0281063	0.00797699	6	1	10010	19226
[OVER]	GO:0030130	clathrin coat of trans-Golgi network vesicle	CELLULAR_COMPONENT	0.0281063	0.00797699	6	1	10010	19226
[OVER]	GO:0030126	COPI vesicle coat	CELLULAR_COMPONENT	0.0281063	0.00797699	6	1	10010	19226
[OVER]	GO:0034045	phagophore assembly site membrane	CELLULAR_COMPONENT	0.0281063	0.00797699	6	1	10010	19226
[OVER]	GO:0042555	MCM complex	CELLULAR_COMPONENT	0.0281063	0.00797699	6	1	10010	19226
[OVER]	GO:0005656	nuclear pre-replicative complex	CELLULAR_COMPONENT	0.0281063	0.00797699	6	1	10010	19226
[OVER]	GO:0030663	COPI-coated vesicle membrane	CELLULAR_COMPONENT	0.0281063	0.00797699	6	1	10010	19226
[OVER]	GO:0000786	nucleosome	CELLULAR_COMPONENT	0.0281063	0.00797699	6	1	10010	19226
[OVER]	GO:0010494	cytoplasmic stress granule	CELLULAR_COMPONENT	0.0281063	0.00797699	6	1	10010	19226
[OVER]	GO:0031298	replication fork protection complex	CELLULAR_COMPONENT	0.0281063	0.00797699	6	1	10010	19226
[OVER]	GO:0044232	organelle membrane contact site	CELLULAR_COMPONENT	0.0281063	0.00797699	6	1	10010	19226
[OVER]	GO:0030140	trans-Golgi network transport vesicle	CELLULAR_COMPONENT	0.0339651	0.00978157	7	2	10009	19225
[OVER]	GO:0008540	proteasome regulatory particle, base subcomplex	CELLULAR_COMPONENT	0.0339651	0.00978157	7	2	10009	19225
[OVER]	GO:0034399	nuclear periphery	CELLULAR_COMPONENT	0.0365625	0.0105605	13	8	10003	19219
[OVER]	GO:0048500	signal recognition particle	CELLULAR_COMPONENT	0.0443855	0.0137568	4	0	10012	19227
[OVER]	GO:0000275	mitochondrial proton-transporting ATP synthase complex, catalytic sector F(1)	CELLULAR_COMPONENT	0.0443855	0.0137568	4	0	10012	19227
[OVER]	GO:0000243	commitment complex	CELLULAR_COMPONENT	0.0443855	0.0137568	4	0	10012	19227
[OVER]	GO:0030121	AP-1 adaptor complex	CELLULAR_COMPONENT	0.0443855	0.0137568	4	0	10012	19227
[OVER]	GO:0042729	DASH complex	CELLULAR_COMPONENT	0.0443855	0.0137568	4	0	10012	19227
[OVER]	GO:0005786	signal recognition particle, endoplasmic reticulum targeting	CELLULAR_COMPONENT	0.0443855	0.0137568	4	0	10012	19227
[OVER]	GO:0005669	transcription factor TFIID complex	CELLULAR_COMPONENT	0.0443855	0.0137568	4	0	10012	19227
[OVER]	GO:0005688	U6 snRNP	CELLULAR_COMPONENT	0.0443855	0.0137568	4	0	10012	19227
[OVER]	GO:0005666	RNA polymerase III complex	CELLULAR_COMPONENT	0.0443855	0.0137568	4	0	10012	19227
[OVER]	GO:0000794	condensed nuclear chromosome	CELLULAR_COMPONENT	0.0443855	0.0137568	4	0	10012	19227
[OVER]	GO:0005956	protein kinase CK2 complex	CELLULAR_COMPONENT	0.0443855	0.0137568	4	0	10012	19227
[OVER]	GO:0005940	septin ring	CELLULAR_COMPONENT	0.0443855	0.0137568	4	0	10012	19227
[OVER]	GO:0045254	pyruvate dehydrogenase complex	CELLULAR_COMPONENT	0.0443855	0.0137568	4	0	10012	19227
[OVER]	GO:0140445	chromosome, telomeric repeat region	CELLULAR_COMPONENT	0.0443855	0.0137568	4	0	10012	19227
[OVER]	GO:0000131	incipient cellular bud site	CELLULAR_COMPONENT	0.0443855	0.0137568	4	0	10012	19227
[OVER]	GO:0009277	fungal-type cell wall	CELLULAR_COMPONENT	0.048209	0.0150238	9	4	10007	19223
[OVER]	GO:0005488	binding	MOLECULAR_FUNCTION	0	0	2016	881	8000	18346
[OVER]	GO:0003824	catalytic activity	MOLECULAR_FUNCTION	0	0	2668	1409	7348	17818
[OVER]	GO:0097159	organic cyclic compound binding	MOLECULAR_FUNCTION	3.00432e-230	9.75277e-233	1240	497	8776	18730
[OVER]	GO:1901363	heterocyclic compound binding	MOLECULAR_FUNCTION	2.72541e-229	9.26867e-232	1236	496	8780	18731
[OVER]	GO:0043167	ion binding	MOLECULAR_FUNCTION	1.51406e-219	5.38311e-222	1228	515	8788	18712
[OVER]	GO:0016787	hydrolase activity	MOLECULAR_FUNCTION	1.29114e-189	5.38891e-192	1034	415	8982	18812
[OVER]	GO:0036094	small molecule binding	MOLECULAR_FUNCTION	4.79509e-142	3.18734e-144	787	317	9229	18910
[OVER]	GO:1901265	nucleoside phosphate binding	MOLECULAR_FUNCTION	1.36841e-135	9.51902e-138	731	284	9285	18943
[OVER]	GO:0000166	nucleotide binding	MOLECULAR_FUNCTION	1.36841e-135	9.51902e-138	731	284	9285	18943
[OVER]	GO:0043168	anion binding	MOLECULAR_FUNCTION	1.33107e-128	9.87652e-131	640	222	9376	19005
[OVER]	GO:0017076	purine nucleotide binding	MOLECULAR_FUNCTION	1.11299e-124	8.60248e-127	541	151	9475	19076
[OVER]	GO:0097367	carbohydrate derivative binding	MOLECULAR_FUNCTION	2.60744e-121	2.05564e-123	528	148	9488	19079
[OVER]	GO:0032553	ribonucleotide binding	MOLECULAR_FUNCTION	6.90456e-121	5.65685e-123	515	139	9501	19088
[OVER]	GO:0035639	purine ribonucleoside triphosphate binding	MOLECULAR_FUNCTION	4.51851e-119	3.84168e-121	490	124	9526	19103
[OVER]	GO:0032555	purine ribonucleotide binding	MOLECULAR_FUNCTION	5.06167e-116	4.38172e-118	494	133	9522	19094
[OVER]	GO:0003676	nucleic acid binding	MOLECULAR_FUNCTION	1.19631e-113	1.0541e-115	502	144	9514	19083
[OVER]	GO:0043169	cation binding	MOLECULAR_FUNCTION	6.38305e-99	5.92028e-101	636	300	9380	18927
[OVER]	GO:0046872	metal ion binding	MOLECULAR_FUNCTION	3.60675e-98	3.40102e-100	631	298	9385	18929
[OVER]	GO:0030554	adenyl nucleotide binding	MOLECULAR_FUNCTION	1.79638e-97	1.72168e-99	450	138	9566	19089
[OVER]	GO:0016740	transferase activity	MOLECULAR_FUNCTION	1.80602e-95	1.75884e-97	730	408	9286	18819
[OVER]	GO:0005524	ATP binding	MOLECULAR_FUNCTION	1.96778e-91	1.97721e-93	400	112	9616	19115
[OVER]	GO:0032559	adenyl ribonucleotide binding	MOLECULAR_FUNCTION	3.56775e-88	3.80545e-90	403	121	9613	19106
[OVER]	GO:0140096	catalytic activity, acting on a protein	MOLECULAR_FUNCTION	4.01338e-77	5.27341e-79	399	144	9617	19083
[OVER]	GO:0016491	oxidoreductase activity	MOLECULAR_FUNCTION	2.42734e-64	3.86483e-66	611	403	9405	18824
[OVER]	GO:0003723	RNA binding	MOLECULAR_FUNCTION	2.47602e-60	4.05716e-62	224	45	9792	19182
[OVER]	GO:0005215	transporter activity	MOLECULAR_FUNCTION	2.72064e-60	4.50005e-62	406	199	9610	19028
[OVER]	GO:0022857	transmembrane transporter activity	MOLECULAR_FUNCTION	1.46286e-56	2.62316e-58	392	197	9624	19030
[OVER]	GO:0016788	hydrolase activity, acting on ester bonds	MOLECULAR_FUNCTION	3.2643e-55	5.9039e-57	232	60	9784	19167
[OVER]	GO:0005515	protein binding	MOLECULAR_FUNCTION	2.24227e-54	4.12475e-56	227	58	9789	19169
[OVER]	GO:0140640	catalytic activity, acting on a nucleic acid	MOLECULAR_FUNCTION	2.60766e-53	4.87753e-55	220	55	9796	19172
[OVER]	GO:0140657	ATP-dependent activity	MOLECULAR_FUNCTION	5.0674e-52	9.63504e-54	239	72	9777	19155
[OVER]	GO:0005198	structural molecule activity	MOLECULAR_FUNCTION	3.47828e-47	7.36627e-49	133	11	9883	19216
[OVER]	GO:0016817	hydrolase activity, acting on acid anhydrides	MOLECULAR_FUNCTION	8.91892e-45	1.99914e-46	190	50	9826	19177
[OVER]	GO:0016818	hydrolase activity, acting on acid anhydrides, in phosphorus-containing anhydrides	MOLECULAR_FUNCTION	2.05731e-44	4.67498e-46	189	50	9827	19177
[OVER]	GO:0016462	pyrophosphatase activity	MOLECULAR_FUNCTION	2.52665e-43	5.93678e-45	186	50	9830	19177
[OVER]	GO:0017111	ribonucleoside triphosphate phosphatase activity	MOLECULAR_FUNCTION	1.91015e-41	4.54727e-43	170	42	9846	19185
[OVER]	GO:0003735	structural constituent of ribosome	MOLECULAR_FUNCTION	2.67701e-38	6.74528e-40	106	8	9910	19219
[OVER]	GO:0016772	transferase activity, transferring phosphorus-containing groups	MOLECULAR_FUNCTION	3.13813e-37	8.10121e-39	260	131	9756	19096
[OVER]	GO:0015075	ion transmembrane transporter activity	MOLECULAR_FUNCTION	8.52252e-34	2.38506e-35	134	31	9882	19196
[OVER]	GO:0140098	catalytic activity, acting on RNA	MOLECULAR_FUNCTION	2.21034e-33	6.3553e-35	130	29	9886	19198
[OVER]	GO:0016798	hydrolase activity, acting on glycosyl bonds	MOLECULAR_FUNCTION	3.35443e-33	9.69667e-35	196	83	9820	19144
[OVER]	GO:0015318	inorganic molecular entity transmembrane transporter activity	MOLECULAR_FUNCTION	1.22634e-31	3.60186e-33	115	22	9901	19205
[OVER]	GO:0003677	DNA binding	MOLECULAR_FUNCTION	1.67766e-31	4.95337e-33	180	73	9836	19154
[OVER]	GO:0046914	transition metal ion binding	MOLECULAR_FUNCTION	3.84936e-31	1.16034e-32	243	136	9773	19091
[OVER]	GO:0016874	ligase activity	MOLECULAR_FUNCTION	1.73771e-30	5.26498e-32	118	26	9898	19201
[OVER]	GO:0008233	peptidase activity	MOLECULAR_FUNCTION	1.14479e-29	3.55702e-31	166	66	9850	19161
[OVER]	GO:0019001	guanyl nucleotide binding	MOLECULAR_FUNCTION	2.4188e-28	7.88941e-30	92	13	9924	19214
[OVER]	GO:0032561	guanyl ribonucleotide binding	MOLECULAR_FUNCTION	2.4188e-28	7.88941e-30	92	13	9924	19214
[OVER]	GO:0008324	cation transmembrane transporter activity	MOLECULAR_FUNCTION	5.05951e-28	1.65809e-29	110	25	9906	19202
[OVER]	GO:0005525	GTP binding	MOLECULAR_FUNCTION	6.16894e-28	2.0312e-29	91	13	9925	19214
[OVER]	GO:0042578	phosphoric ester hydrolase activity	MOLECULAR_FUNCTION	1.09307e-25	3.80184e-27	98	21	9918	19206
[OVER]	GO:0004553	hydrolase activity, hydrolyzing O-glycosyl compounds	MOLECULAR_FUNCTION	4.98907e-25	1.79696e-26	148	63	9868	19164
[OVER]	GO:0022890	inorganic cation transmembrane transporter activity	MOLECULAR_FUNCTION	1.53814e-24	5.61139e-26	92	19	9924	19208
[OVER]	GO:0016301	kinase activity	MOLECULAR_FUNCTION	2.47142e-24	9.05437e-26	184	100	9832	19127
[OVER]	GO:0003924	GTPase activity	MOLECULAR_FUNCTION	9.33838e-23	3.6522e-24	73	10	9943	19217
[OVER]	GO:0022804	active transmembrane transporter activity	MOLECULAR_FUNCTION	3.55885e-22	1.41386e-23	102	31	9914	19196
[OVER]	GO:0008270	zinc ion binding	MOLECULAR_FUNCTION	5.98804e-21	2.41595e-22	149	77	9867	19150
[OVER]	GO:0016791	phosphatase activity	MOLECULAR_FUNCTION	1.53743e-20	6.3931e-22	74	14	9942	19213
[OVER]	GO:0016887	ATP hydrolysis activity	MOLECULAR_FUNCTION	2.5341e-20	1.0655e-21	97	31	9919	19196
[OVER]	GO:0098772	molecular function regulator activity	MOLECULAR_FUNCTION	9.07665e-20	3.88659e-21	75	16	9941	19211
[OVER]	GO:0016773	phosphotransferase activity, alcohol group as acceptor	MOLECULAR_FUNCTION	1.07694e-19	4.62805e-21	133	65	9883	19162
[OVER]	GO:0016829	lyase activity	MOLECULAR_FUNCTION	5.73371e-18	2.57924e-19	130	68	9886	19159
[OVER]	GO:0045182	translation regulator activity	MOLECULAR_FUNCTION	8.67497e-18	3.91574e-19	59	9	9957	19218
[OVER]	GO:0090079	translation regulator activity, nucleic acid binding	MOLECULAR_FUNCTION	1.14235e-17	5.1917e-19	57	8	9959	19219
[OVER]	GO:0008135	translation factor activity, RNA binding	MOLECULAR_FUNCTION	1.14235e-17	5.1917e-19	57	8	9959	19219
[OVER]	GO:0030234	enzyme regulator activity	MOLECULAR_FUNCTION	8.9975e-17	4.26995e-18	67	16	9949	19211
[OVER]	GO:0016853	isomerase activity	MOLECULAR_FUNCTION	2.8521e-16	1.37997e-17	75	23	9941	19204
[OVER]	GO:0004386	helicase activity	MOLECULAR_FUNCTION	3.87781e-16	1.89425e-17	68	18	9948	19209
[OVER]	GO:0044877	protein-containing complex binding	MOLECULAR_FUNCTION	6.06406e-16	2.99032e-17	59	12	9957	19215
[OVER]	GO:0016757	glycosyltransferase activity	MOLECULAR_FUNCTION	1.14805e-15	5.75e-17	77	26	9939	19201
[OVER]	GO:0016810	hydrolase activity, acting on carbon-nitrogen (but not peptide) bonds	MOLECULAR_FUNCTION	1.0047e-14	5.29609e-16	72	24	9944	19203
[OVER]	GO:0004518	nuclease activity	MOLECULAR_FUNCTION	2.32269e-14	1.25308e-15	59	15	9957	19212
[OVER]	GO:0140097	catalytic activity, acting on DNA	MOLECULAR_FUNCTION	4.17747e-14	2.29247e-15	64	19	9952	19208
[OVER]	GO:0015078	proton transmembrane transporter activity	MOLECULAR_FUNCTION	4.2577e-14	2.34967e-15	48	8	9968	19219
[OVER]	GO:0016741	transferase activity, transferring one-carbon groups	MOLECULAR_FUNCTION	6.88729e-14	3.85407e-15	88	41	9928	19186
[OVER]	GO:0008092	cytoskeletal protein binding	MOLECULAR_FUNCTION	1.51064e-13	8.59354e-15	54	13	9962	19214
[OVER]	GO:0015399	primary active transmembrane transporter activity	MOLECULAR_FUNCTION	3.51453e-13	2.02103e-14	65	22	9951	19205
[OVER]	GO:0004672	protein kinase activity	MOLECULAR_FUNCTION	3.58042e-13	2.06446e-14	92	47	9924	19180
[OVER]	GO:0022853	active ion transmembrane transporter activity	MOLECULAR_FUNCTION	3.59418e-13	2.07795e-14	57	16	9959	19211
[OVER]	GO:0015267	channel activity	MOLECULAR_FUNCTION	4.72787e-13	2.74799e-14	32	1	9984	19226
[OVER]	GO:0022803	passive transmembrane transporter activity	MOLECULAR_FUNCTION	4.72787e-13	2.74799e-14	32	1	9984	19226
[OVER]	GO:0008168	methyltransferase activity	MOLECULAR_FUNCTION	5.41878e-13	3.16633e-14	83	39	9933	19188
[OVER]	GO:0140677	molecular function activator activity	MOLECULAR_FUNCTION	5.86343e-13	3.43521e-14	51	12	9965	19215
[OVER]	GO:0016779	nucleotidyltransferase activity	MOLECULAR_FUNCTION	8.00747e-13	4.76561e-14	56	16	9960	19211
[OVER]	GO:0051536	iron-sulfur cluster binding	MOLECULAR_FUNCTION	1.4146e-12	8.5064e-14	54	15	9962	19212
[OVER]	GO:0051540	metal cluster binding	MOLECULAR_FUNCTION	1.4146e-12	8.5064e-14	54	15	9962	19212
[OVER]	GO:0003743	translation initiation factor activity	MOLECULAR_FUNCTION	1.60473e-12	9.72414e-14	39	5	9977	19222
[OVER]	GO:0140101	catalytic activity, acting on a tRNA	MOLECULAR_FUNCTION	2.9866e-12	1.84671e-13	56	17	9960	19210
[OVER]	GO:0016616	oxidoreductase activity, acting on the CH-OH group of donors, NAD or NADP as acceptor	MOLECULAR_FUNCTION	5.95114e-12	3.73499e-13	62	23	9954	19204
[OVER]	GO:0051213	dioxygenase activity	MOLECULAR_FUNCTION	8.56134e-12	5.42611e-13	45	10	9971	19217
[OVER]	GO:0005216	ion channel activity	MOLECULAR_FUNCTION	9.78687e-12	6.26335e-13	29	1	9987	19226
[OVER]	GO:0052689	carboxylic ester hydrolase activity	MOLECULAR_FUNCTION	1.20879e-11	7.77332e-13	46	11	9970	19216
[OVER]	GO:0016614	oxidoreductase activity, acting on CH-OH group of donors	MOLECULAR_FUNCTION	2.09609e-11	1.36737e-12	77	38	9939	19189
[OVER]	GO:0016758	hexosyltransferase activity	MOLECULAR_FUNCTION	2.7635e-11	1.84119e-12	49	14	9967	19213
[OVER]	GO:0051539	4 iron, 4 sulfur cluster binding	MOLECULAR_FUNCTION	9.43034e-11	6.50167e-12	29	2	9987	19225
[OVER]	GO:0008238	exopeptidase activity	MOLECULAR_FUNCTION	2.44583e-10	1.73541e-11	45	13	9971	19214
[OVER]	GO:0008047	enzyme activator activity	MOLECULAR_FUNCTION	2.49927e-10	1.78106e-11	28	2	9988	19225
[OVER]	GO:0042626	ATPase-coupled transmembrane transporter activity	MOLECULAR_FUNCTION	2.71362e-10	1.938e-11	56	22	9960	19205
[OVER]	GO:0046983	protein dimerization activity	MOLECULAR_FUNCTION	3.97903e-10	2.85403e-11	33	5	9983	19222
[OVER]	GO:0008237	metallopeptidase activity	MOLECULAR_FUNCTION	4.60853e-10	3.31267e-11	46	14	9970	19213
[OVER]	GO:0004674	protein serine/threonine kinase activity	MOLECULAR_FUNCTION	9.90964e-10	7.24572e-11	47	16	9969	19211
[OVER]	GO:0003729	mRNA binding	MOLECULAR_FUNCTION	1.3465e-09	9.92856e-11	30	4	9986	19223
[OVER]	GO:0030246	carbohydrate binding	MOLECULAR_FUNCTION	1.5229e-09	1.12764e-10	49	18	9967	19209
[OVER]	GO:0016875	ligase activity, forming carbon-oxygen bonds	MOLECULAR_FUNCTION	1.59797e-09	1.1931e-10	36	8	9980	19219
[OVER]	GO:0004812	aminoacyl-tRNA ligase activity	MOLECULAR_FUNCTION	1.59797e-09	1.1931e-10	36	8	9980	19219
[OVER]	GO:0008289	lipid binding	MOLECULAR_FUNCTION	2.05637e-09	1.56715e-10	46	16	9970	19211
[OVER]	GO:0015291	secondary active transmembrane transporter activity	MOLECULAR_FUNCTION	2.20221e-09	1.68851e-10	37	9	9979	19218
[OVER]	GO:0046873	metal ion transmembrane transporter activity	MOLECULAR_FUNCTION	6.0309e-09	4.74529e-10	33	7	9983	19220
[OVER]	GO:0005261	cation channel activity	MOLECULAR_FUNCTION	6.11243e-09	4.87558e-10	20	0	9996	19227
[OVER]	GO:0034062	5'-3' RNA polymerase activity	MOLECULAR_FUNCTION	6.11243e-09	4.87558e-10	20	0	9996	19227
[OVER]	GO:0097747	RNA polymerase activity	MOLECULAR_FUNCTION	6.11243e-09	4.87558e-10	20	0	9996	19227
[OVER]	GO:0008757	S-adenosylmethionine-dependent methyltransferase activity	MOLECULAR_FUNCTION	6.63679e-09	5.3041e-10	37	10	9979	19217
[OVER]	GO:0016627	oxidoreductase activity, acting on the CH-CH group of donors	MOLECULAR_FUNCTION	8.46323e-09	6.78994e-10	38	11	9978	19216
[OVER]	GO:0016835	carbon-oxygen lyase activity	MOLECULAR_FUNCTION	1.04974e-08	8.47062e-10	48	19	9968	19208
[OVER]	GO:0008094	ATP-dependent activity, acting on DNA	MOLECULAR_FUNCTION	1.15011e-08	9.36942e-10	35	9	9981	19218
[OVER]	GO:0004175	endopeptidase activity	MOLECULAR_FUNCTION	1.18947e-08	9.70848e-10	45	17	9971	19210
[OVER]	GO:0016879	ligase activity, forming carbon-nitrogen bonds	MOLECULAR_FUNCTION	2.03748e-08	1.69764e-09	27	4	9989	19223
[OVER]	GO:0051082	unfolded protein binding	MOLECULAR_FUNCTION	2.03748e-08	1.69764e-09	27	4	9989	19223
[OVER]	GO:0016667	oxidoreductase activity, acting on a sulfur group of donors	MOLECULAR_FUNCTION	2.92243e-08	2.47113e-09	21	1	9995	19226
[OVER]	GO:0016746	acyltransferase activity	MOLECULAR_FUNCTION	4.21108e-08	3.62587e-09	103	83	9913	19144
[OVER]	GO:0003899	DNA-directed 5'-3' RNA polymerase activity	MOLECULAR_FUNCTION	4.8041e-08	4.16618e-09	18	0	9998	19227
[OVER]	GO:0003690	double-stranded DNA binding	MOLECULAR_FUNCTION	4.94704e-08	4.33602e-09	26	4	9990	19223
[OVER]	GO:0004721	phosphoprotein phosphatase activity	MOLECULAR_FUNCTION	7.42091e-08	6.63052e-09	30	7	9986	19220
[OVER]	GO:0019843	rRNA binding	MOLECULAR_FUNCTION	7.6995e-08	6.90324e-09	20	1	9996	19226
[OVER]	GO:0046982	protein heterodimerization activity	MOLECULAR_FUNCTION	7.6995e-08	6.90324e-09	20	1	9996	19226
[OVER]	GO:0044183	protein folding chaperone	MOLECULAR_FUNCTION	7.89889e-08	7.13085e-09	22	2	9994	19225
[OVER]	GO:0016701	oxidoreductase activity, acting on single donors with incorporation of molecular oxygen	MOLECULAR_FUNCTION	7.89889e-08	7.13085e-09	22	2	9994	19225
[OVER]	GO:0016903	oxidoreductase activity, acting on the aldehyde or oxo group of donors	MOLECULAR_FUNCTION	7.98148e-08	7.29179e-09	27	5	9989	19222
[OVER]	GO:0003779	actin binding	MOLECULAR_FUNCTION	9.82997e-08	9.04132e-09	31	8	9985	19219
[OVER]	GO:0016651	oxidoreductase activity, acting on NAD(P)H	MOLECULAR_FUNCTION	1.67441e-07	1.5789e-08	29	7	9987	19220
[OVER]	GO:0050660	flavin adenine dinucleotide binding	MOLECULAR_FUNCTION	1.68699e-07	1.59337e-08	81	59	9935	19168
[OVER]	GO:0042802	identical protein binding	MOLECULAR_FUNCTION	1.90231e-07	1.80556e-08	26	5	9990	19222
[OVER]	GO:0140110	transcription regulator activity	MOLECULAR_FUNCTION	2.41918e-07	2.31111e-08	86	66	9930	19161
[OVER]	GO:0060090	molecular adaptor activity	MOLECULAR_FUNCTION	2.79128e-07	2.69247e-08	27	6	9989	19221
[OVER]	GO:0019787	ubiquitin-like protein transferase activity	MOLECULAR_FUNCTION	3.84873e-07	3.73628e-08	28	7	9988	19220
[OVER]	GO:0019829	ATPase-coupled cation transmembrane transporter activity	MOLECULAR_FUNCTION	4.98281e-07	4.89885e-08	29	8	9987	19219
[OVER]	GO:0005506	iron ion binding	MOLECULAR_FUNCTION	7.43929e-07	7.46344e-08	73	53	9943	19174
[OVER]	GO:0009055	electron transfer activity	MOLECULAR_FUNCTION	1.01335e-06	1.04014e-07	15	0	10001	19227
[OVER]	GO:0003724	RNA helicase activity	MOLECULAR_FUNCTION	1.03772e-06	1.08761e-07	24	5	9992	19222
[OVER]	GO:0140662	ATP-dependent protein folding chaperone	MOLECULAR_FUNCTION	1.28868e-06	1.36458e-07	19	2	9997	19225
[OVER]	GO:0042625	ATPase-coupled ion transmembrane transporter activity	MOLECULAR_FUNCTION	1.39503e-06	1.48366e-07	17	1	9999	19226
[OVER]	GO:0016860	intramolecular oxidoreductase activity	MOLECULAR_FUNCTION	1.39503e-06	1.48366e-07	17	1	9999	19226
[OVER]	GO:0043565	sequence-specific DNA binding	MOLECULAR_FUNCTION	1.44997e-06	1.54433e-07	25	6	9991	19221
[OVER]	GO:0003682	chromatin binding	MOLECULAR_FUNCTION	1.63602e-06	1.75261e-07	22	4	9994	19223
[OVER]	GO:0004519	endonuclease activity	MOLECULAR_FUNCTION	1.96715e-06	2.11646e-07	31	11	9985	19216
[OVER]	GO:0019899	enzyme binding	MOLECULAR_FUNCTION	2.00361e-06	2.15879e-07	30	10	9986	19217
[OVER]	GO:0000287	magnesium ion binding	MOLECULAR_FUNCTION	2.62684e-06	2.88307e-07	35	15	9981	19212
[OVER]	GO:0009678	pyrophosphate hydrolysis-driven proton transmembrane transporter activity	MOLECULAR_FUNCTION	3.26018e-06	3.6185e-07	18	2	9998	19225
[OVER]	GO:0008186	ATP-dependent activity, acting on RNA	MOLECULAR_FUNCTION	3.28839e-06	3.65998e-07	24	6	9992	19221
[OVER]	GO:0016747	acyltransferase activity, transferring groups other than amino-acyl groups	MOLECULAR_FUNCTION	3.57248e-06	3.9817e-07	67	50	9949	19177
[OVER]	GO:0044769	ATPase activity, coupled to transmembrane movement of ions, rotational mechanism	MOLECULAR_FUNCTION	3.62514e-06	4.10203e-07	16	1	10000	19226
[OVER]	GO:0016836	hydro-lyase activity	MOLECULAR_FUNCTION	3.62514e-06	4.09066e-07	36	16	9980	19211
[OVER]	GO:0046961	proton-transporting ATPase activity, rotational mechanism	MOLECULAR_FUNCTION	3.62514e-06	4.10203e-07	16	1	10000	19226
[OVER]	GO:0005543	phospholipid binding	MOLECULAR_FUNCTION	3.87407e-06	4.41365e-07	29	10	9987	19217
[OVER]	GO:0004842	ubiquitin-protein transferase activity	MOLECULAR_FUNCTION	4.15162e-06	4.74911e-07	25	7	9991	19220
[OVER]	GO:0050661	NADP binding	MOLECULAR_FUNCTION	5.4953e-06	6.37961e-07	22	5	9994	19222
[OVER]	GO:0016620	oxidoreductase activity, acting on the aldehyde or oxo group of donors, NAD or NADP as acceptor	MOLECULAR_FUNCTION	5.4953e-06	6.37961e-07	22	5	9994	19222
[OVER]	GO:0043021	ribonucleoprotein complex binding	MOLECULAR_FUNCTION	7.27893e-06	8.6078e-07	23	6	9993	19221
[OVER]	GO:0008509	anion transmembrane transporter activity	MOLECULAR_FUNCTION	7.84457e-06	9.38584e-07	29	11	9987	19216
[OVER]	GO:0035091	phosphatidylinositol binding	MOLECULAR_FUNCTION	8.02513e-06	9.68871e-07	27	9	9989	19218
[OVER]	GO:0004177	aminopeptidase activity	MOLECULAR_FUNCTION	8.79457e-06	1.074e-06	20	4	9996	19223
[OVER]	GO:0030674	protein-macromolecule adaptor activity	MOLECULAR_FUNCTION	8.79457e-06	1.074e-06	20	4	9996	19223
[OVER]	GO:0015631	tubulin binding	MOLECULAR_FUNCTION	8.79457e-06	1.074e-06	20	4	9996	19223
[OVER]	GO:0008234	cysteine-type peptidase activity	MOLECULAR_FUNCTION	8.79457e-06	1.074e-06	20	4	9996	19223
[OVER]	GO:0004722	protein serine/threonine phosphatase activity	MOLECULAR_FUNCTION	8.79457e-06	1.074e-06	20	4	9996	19223
[OVER]	GO:0008276	protein methyltransferase activity	MOLECULAR_FUNCTION	9.16329e-06	1.13036e-06	15	1	10001	19226
[OVER]	GO:0030170	pyridoxal phosphate binding	MOLECULAR_FUNCTION	1.01786e-05	1.26347e-06	31	13	9985	19214
[OVER]	GO:0070279	vitamin B6 binding	MOLECULAR_FUNCTION	1.01786e-05	1.26347e-06	31	13	9985	19214
[OVER]	GO:0003700	DNA-binding transcription factor activity	MOLECULAR_FUNCTION	1.0656e-05	1.32438e-06	73	60	9943	19167
[OVER]	GO:0016811	hydrolase activity, acting on carbon-nitrogen (but not peptide) bonds, in linear amides	MOLECULAR_FUNCTION	1.55412e-05	1.95076e-06	26	9	9990	19218
[OVER]	GO:0015297	antiporter activity	MOLECULAR_FUNCTION	1.94762e-05	2.5049e-06	16	2	10000	19225
[OVER]	GO:0051287	NAD binding	MOLECULAR_FUNCTION	1.94762e-05	2.48952e-06	30	13	9986	19214
[OVER]	GO:0008170	N-methyltransferase activity	MOLECULAR_FUNCTION	1.94762e-05	2.5049e-06	16	2	10000	19225
[OVER]	GO:0016702	oxidoreductase activity, acting on single donors with incorporation of molecular oxygen, incorporation of two atoms of oxygen	MOLECULAR_FUNCTION	1.94762e-05	2.5049e-06	16	2	10000	19225
[OVER]	GO:0000030	mannosyltransferase activity	MOLECULAR_FUNCTION	1.94762e-05	2.48649e-06	23	7	9993	19220
[OVER]	GO:0004540	ribonuclease activity	MOLECULAR_FUNCTION	2.01542e-05	2.62949e-06	19	4	9997	19223
[OVER]	GO:0016705	oxidoreductase activity, acting on paired donors, with incorporation or reduction of molecular oxygen	MOLECULAR_FUNCTION	2.01542e-05	2.61656e-06	73	62	9943	19165
[OVER]	GO:0016765	transferase activity, transferring alkyl or aryl (other than methyl) groups	MOLECULAR_FUNCTION	2.08516e-05	2.7237e-06	33	16	9983	19211
[OVER]	GO:0060589	nucleoside-triphosphatase regulator activity	MOLECULAR_FUNCTION	2.1314e-05	2.79069e-06	29	12	9987	19215
[OVER]	GO:0030695	GTPase regulator activity	MOLECULAR_FUNCTION	2.1314e-05	2.79069e-06	29	12	9987	19215
[OVER]	GO:0019783	ubiquitin-like protein peptidase activity	MOLECULAR_FUNCTION	2.35619e-05	3.10322e-06	14	1	10002	19226
[OVER]	GO:0016877	ligase activity, forming carbon-sulfur bonds	MOLECULAR_FUNCTION	3.21529e-05	4.31423e-06	17	3	9999	19224
[OVER]	GO:0010181	FMN binding	MOLECULAR_FUNCTION	3.44391e-05	4.64227e-06	21	6	9995	19221
[OVER]	GO:0008081	phosphoric diester hydrolase activity	MOLECULAR_FUNCTION	4.14976e-05	5.61299e-06	22	7	9994	19220
[OVER]	GO:0004527	exonuclease activity	MOLECULAR_FUNCTION	4.683e-05	6.38492e-06	18	4	9998	19223
[OVER]	GO:1990837	sequence-specific double-stranded DNA binding	MOLECULAR_FUNCTION	4.74215e-05	6.53154e-06	15	2	10001	19225
[OVER]	GO:0004222	metalloendopeptidase activity	MOLECULAR_FUNCTION	4.74215e-05	6.53154e-06	15	2	10001	19225
[OVER]	GO:0000049	tRNA binding	MOLECULAR_FUNCTION	4.74215e-05	6.53154e-06	15	2	10001	19225
[OVER]	GO:0015036	disulfide oxidoreductase activity	MOLECULAR_FUNCTION	5.45032e-05	7.58276e-06	11	0	10005	19227
[OVER]	GO:0101005	deubiquitinase activity	MOLECULAR_FUNCTION	5.97816e-05	8.48346e-06	13	1	10003	19226
[OVER]	GO:0046906	tetrapyrrole binding	MOLECULAR_FUNCTION	6.63159e-05	9.46199e-06	69	60	9947	19167
[OVER]	GO:0004497	monooxygenase activity	MOLECULAR_FUNCTION	7.7477e-05	1.12461e-05	77	71	9939	19156
[OVER]	GO:0016830	carbon-carbon lyase activity	MOLECULAR_FUNCTION	7.9178e-05	1.15052e-05	37	22	9979	19205
[OVER]	GO:0015103	inorganic anion transmembrane transporter activity	MOLECULAR_FUNCTION	0.0001054	1.53643e-05	17	4	9999	19223
[OVER]	GO:0005319	lipid transporter activity	MOLECULAR_FUNCTION	0.000115049	1.69132e-05	14	2	10002	19225
[OVER]	GO:0019842	vitamin binding	MOLECULAR_FUNCTION	0.000118479	1.74357e-05	45	32	9971	19195
[OVER]	GO:0015926	glucosidase activity	MOLECULAR_FUNCTION	0.000119266	1.76253e-05	22	8	9994	19219
[OVER]	GO:0008194	UDP-glycosyltransferase activity	MOLECULAR_FUNCTION	0.000134127	1.99045e-05	18	5	9998	19222
[OVER]	GO:0008235	metalloexopeptidase activity	MOLECULAR_FUNCTION	0.000134127	1.99045e-05	18	5	9998	19222
[OVER]	GO:0020037	heme binding	MOLECULAR_FUNCTION	0.000135632	2.01487e-05	67	60	9949	19167
[OVER]	GO:0097599	xylanase activity	MOLECULAR_FUNCTION	0.000147136	2.21534e-05	10	0	10006	19227
[OVER]	GO:0015252	proton channel activity	MOLECULAR_FUNCTION	0.000147136	2.21534e-05	10	0	10006	19227
[OVER]	GO:0015035	protein-disulfide reductase activity	MOLECULAR_FUNCTION	0.000147136	2.21534e-05	10	0	10006	19227
[OVER]	GO:0046933	proton-transporting ATP synthase activity, rotational mechanism	MOLECULAR_FUNCTION	0.000147136	2.21534e-05	10	0	10006	19227
[OVER]	GO:0042277	peptide binding	MOLECULAR_FUNCTION	0.000150359	2.30803e-05	12	1	10004	19226
[OVER]	GO:0004843	cysteine-type deubiquitinase activity	MOLECULAR_FUNCTION	0.000150359	2.30803e-05	12	1	10004	19226
[OVER]	GO:0016782	transferase activity, transferring sulphur-containing groups	MOLECULAR_FUNCTION	0.000150359	2.30803e-05	12	1	10004	19226
[OVER]	GO:0004180	carboxypeptidase activity	MOLECULAR_FUNCTION	0.000171295	2.66648e-05	15	3	10001	19224
[OVER]	GO:0030515	snoRNA binding	MOLECULAR_FUNCTION	0.000171295	2.66648e-05	15	3	10001	19224
[OVER]	GO:0003697	single-stranded DNA binding	MOLECULAR_FUNCTION	0.000273188	4.3455e-05	13	2	10003	19225
[OVER]	GO:0022836	gated channel activity	MOLECULAR_FUNCTION	0.000385455	6.2445e-05	11	1	10005	19226
[OVER]	GO:0016859	cis-trans isomerase activity	MOLECULAR_FUNCTION	0.000392228	6.53612e-05	14	3	10002	19224
[OVER]	GO:0003678	DNA helicase activity	MOLECULAR_FUNCTION	0.000392228	6.53612e-05	14	3	10002	19224
[OVER]	GO:0015453	oxidoreduction-driven active transmembrane transporter activity	MOLECULAR_FUNCTION	0.000392228	6.4718e-05	9	0	10007	19227
[OVER]	GO:0046527	glucosyltransferase activity	MOLECULAR_FUNCTION	0.000392228	6.4718e-05	9	0	10007	19227
[OVER]	GO:0003755	peptidyl-prolyl cis-trans isomerase activity	MOLECULAR_FUNCTION	0.000392228	6.53612e-05	14	3	10002	19224
[OVER]	GO:0051537	2 iron, 2 sulfur cluster binding	MOLECULAR_FUNCTION	0.000472428	7.89449e-05	19	7	9997	19220
[OVER]	GO:0005509	calcium ion binding	MOLECULAR_FUNCTION	0.000489161	8.18168e-05	26	14	9990	19213
[OVER]	GO:0003746	translation elongation factor activity	MOLECULAR_FUNCTION	0.000511944	8.62605e-05	15	4	10001	19223
[OVER]	GO:0016298	lipase activity	MOLECULAR_FUNCTION	0.000568882	9.6382e-05	18	6	9998	19221
[OVER]	GO:0016638	oxidoreductase activity, acting on the CH-NH2 group of donors	MOLECULAR_FUNCTION	0.000644344	0.000110661	12	2	10004	19225
[OVER]	GO:0008017	microtubule binding	MOLECULAR_FUNCTION	0.00090239	0.00015847	13	3	10003	19224
[OVER]	GO:0008173	RNA methyltransferase activity	MOLECULAR_FUNCTION	0.00090239	0.000158745	18	7	9998	19220
[OVER]	GO:0004620	phospholipase activity	MOLECULAR_FUNCTION	0.00090239	0.00015847	13	3	10003	19224
[OVER]	GO:0140359	ABC-type transporter activity	MOLECULAR_FUNCTION	0.000923609	0.000162763	22	11	9994	19216
[OVER]	GO:0016799	hydrolase activity, hydrolyzing N-glycosyl compounds	MOLECULAR_FUNCTION	0.000936108	0.00016786	10	1	10006	19226
[OVER]	GO:0016783	sulfurtransferase activity	MOLECULAR_FUNCTION	0.000936108	0.00016786	10	1	10006	19226
[OVER]	GO:0017018	myosin phosphatase activity	MOLECULAR_FUNCTION	0.000936108	0.00016786	10	1	10006	19226
[OVER]	GO:0005315	inorganic phosphate transmembrane transporter activity	MOLECULAR_FUNCTION	0.00102255	0.000189052	8	0	10008	19227
[OVER]	GO:0106310	protein serine kinase activity	MOLECULAR_FUNCTION	0.00102255	0.000189052	8	0	10008	19227
[OVER]	GO:0016861	intramolecular oxidoreductase activity, interconverting aldoses and ketoses	MOLECULAR_FUNCTION	0.00102255	0.000189052	8	0	10008	19227
[OVER]	GO:0016833	oxo-acid-lyase activity	MOLECULAR_FUNCTION	0.00102255	0.000189052	8	0	10008	19227
[OVER]	GO:0031176	endo-1,4-beta-xylanase activity	MOLECULAR_FUNCTION	0.00102255	0.000189052	8	0	10008	19227
[OVER]	GO:0008641	ubiquitin-like modifier activating enzyme activity	MOLECULAR_FUNCTION	0.00102255	0.000189052	8	0	10008	19227
[OVER]	GO:0016209	antioxidant activity	MOLECULAR_FUNCTION	0.00117716	0.000218728	23	12	9993	19215
[OVER]	GO:0008422	beta-glucosidase activity	MOLECULAR_FUNCTION	0.00126279	0.000235224	15	5	10001	19222
[OVER]	GO:0140299	small molecule sensor activity	MOLECULAR_FUNCTION	0.00126279	0.000235224	15	5	10001	19222
[OVER]	GO:0005096	GTPase activator activity	MOLECULAR_FUNCTION	0.00148155	0.000278951	11	2	10005	19225
[OVER]	GO:0004536	deoxyribonuclease activity	MOLECULAR_FUNCTION	0.00148155	0.000278951	11	2	10005	19225
[OVER]	GO:0030247	polysaccharide binding	MOLECULAR_FUNCTION	0.00163057	0.00030726	18	8	9998	19219
[OVER]	GO:0030248	cellulose binding	MOLECULAR_FUNCTION	0.00170249	0.000321075	17	7	9999	19220
[OVER]	GO:0003684	damaged DNA binding	MOLECULAR_FUNCTION	0.0022936	0.000447799	9	1	10007	19226
[OVER]	GO:0005048	signal sequence binding	MOLECULAR_FUNCTION	0.0022936	0.000447799	9	1	10007	19226
[OVER]	GO:0140102	catalytic activity, acting on a rRNA	MOLECULAR_FUNCTION	0.0022936	0.000447799	9	1	10007	19226
[OVER]	GO:0046915	transition metal ion transmembrane transporter activity	MOLECULAR_FUNCTION	0.0022936	0.000447799	9	1	10007	19226
[OVER]	GO:0000981	DNA-binding transcription factor activity, RNA polymerase II-specific	MOLECULAR_FUNCTION	0.00232599	0.000454483	57	56	9959	19171
[OVER]	GO:0051015	actin filament binding	MOLECULAR_FUNCTION	0.00234671	0.000461072	13	4	10003	19223
[OVER]	GO:0016763	pentosyltransferase activity	MOLECULAR_FUNCTION	0.00234671	0.000461072	13	4	10003	19223
[OVER]	GO:0070006	metalloaminopeptidase activity	MOLECULAR_FUNCTION	0.00273948	0.000552215	7	0	10009	19227
[OVER]	GO:0016655	oxidoreductase activity, acting on NAD(P)H, quinone or similar compound as acceptor	MOLECULAR_FUNCTION	0.00273948	0.000552215	7	0	10009	19227
[OVER]	GO:0042887	amide transmembrane transporter activity	MOLECULAR_FUNCTION	0.00321018	0.000649083	16	7	10000	19220
[OVER]	GO:0016893	endonuclease activity, active with either ribo- or deoxyribonucleic acids and producing 5'-phosphomonoesters	MOLECULAR_FUNCTION	0.00339541	0.000694934	10	2	10006	19225
[OVER]	GO:0016776	phosphotransferase activity, phosphate group as acceptor	MOLECULAR_FUNCTION	0.00339541	0.000694934	10	2	10006	19225
[OVER]	GO:0016410	N-acyltransferase activity	MOLECULAR_FUNCTION	0.00347195	0.000711135	15	6	10001	19221
[OVER]	GO:0016814	hydrolase activity, acting on carbon-nitrogen (but not peptide) bonds, in cyclic amidines	MOLECULAR_FUNCTION	0.00421437	0.000867109	14	5	10002	19222
[OVER]	GO:0032182	ubiquitin-like protein binding	MOLECULAR_FUNCTION	0.00421437	0.000867109	14	5	10002	19222
[OVER]	GO:0043130	ubiquitin binding	MOLECULAR_FUNCTION	0.00421437	0.000867109	14	5	10002	19222
[OVER]	GO:0102483	scopolin beta-glucosidase activity	MOLECULAR_FUNCTION	0.00431594	0.000896014	11	3	10005	19224
[OVER]	GO:0019887	protein kinase regulator activity	MOLECULAR_FUNCTION	0.00431594	0.000896014	11	3	10005	19224
[OVER]	GO:0004521	endoribonuclease activity	MOLECULAR_FUNCTION	0.00431594	0.000896014	11	3	10005	19224
[OVER]	GO:0015085	calcium ion transmembrane transporter activity	MOLECULAR_FUNCTION	0.00431594	0.000896014	11	3	10005	19224
[OVER]	GO:0019207	kinase regulator activity	MOLECULAR_FUNCTION	0.00431594	0.000896014	11	3	10005	19224
[OVER]	GO:0071949	FAD binding	MOLECULAR_FUNCTION	0.00477917	0.000994399	33	27	9983	19200
[OVER]	GO:0061659	ubiquitin-like protein ligase activity	MOLECULAR_FUNCTION	0.00496257	0.00104253	12	4	10004	19223
[OVER]	GO:0061630	ubiquitin protein ligase activity	MOLECULAR_FUNCTION	0.00496257	0.00104253	12	4	10004	19223
[OVER]	GO:0031369	translation initiation factor binding	MOLECULAR_FUNCTION	0.00551296	0.00118372	8	1	10008	19226
[OVER]	GO:0004520	endodeoxyribonuclease activity	MOLECULAR_FUNCTION	0.00551296	0.00118372	8	1	10008	19226
[OVER]	GO:0016881	acid-amino acid ligase activity	MOLECULAR_FUNCTION	0.00551296	0.00118372	8	1	10008	19226
[OVER]	GO:0008408	3'-5' exonuclease activity	MOLECULAR_FUNCTION	0.00551296	0.00118372	8	1	10008	19226
[OVER]	GO:0016846	carbon-sulfur lyase activity	MOLECULAR_FUNCTION	0.00551296	0.00118372	8	1	10008	19226
[OVER]	GO:0016646	oxidoreductase activity, acting on the CH-NH group of donors, NAD or NADP as acceptor	MOLECULAR_FUNCTION	0.00551296	0.00118372	8	1	10008	19226
[OVER]	GO:0016641	oxidoreductase activity, acting on the CH-NH2 group of donors, oxygen as acceptor	MOLECULAR_FUNCTION	0.00551296	0.00118372	8	1	10008	19226
[OVER]	GO:0008649	rRNA methyltransferase activity	MOLECULAR_FUNCTION	0.00551296	0.00118372	8	1	10008	19226
[OVER]	GO:0031072	heat shock protein binding	MOLECULAR_FUNCTION	0.00551296	0.00118372	8	1	10008	19226
[OVER]	GO:0016407	acetyltransferase activity	MOLECULAR_FUNCTION	0.00553972	0.00119033	24	16	9992	19211
[OVER]	GO:0140678	molecular function inhibitor activity	MOLECULAR_FUNCTION	0.00574493	0.00123531	20	12	9996	19215
[OVER]	GO:0017171	serine hydrolase activity	MOLECULAR_FUNCTION	0.00598163	0.00128805	28	21	9988	19206
[OVER]	GO:0008236	serine-type peptidase activity	MOLECULAR_FUNCTION	0.00598163	0.00128805	28	21	9988	19206
[OVER]	GO:0035251	UDP-glucosyltransferase activity	MOLECULAR_FUNCTION	0.00709302	0.0016129	6	0	10010	19227
[OVER]	GO:0005484	SNAP receptor activity	MOLECULAR_FUNCTION	0.00709302	0.0016129	6	0	10010	19227
[OVER]	GO:0030145	manganese ion binding	MOLECULAR_FUNCTION	0.00709302	0.0016129	6	0	10010	19227
[OVER]	GO:0070003	threonine-type peptidase activity	MOLECULAR_FUNCTION	0.00709302	0.0016129	6	0	10010	19227
[OVER]	GO:0061650	ubiquitin-like protein conjugating enzyme activity	MOLECULAR_FUNCTION	0.00709302	0.0016129	6	0	10010	19227
[OVER]	GO:0030527	structural constituent of chromatin	MOLECULAR_FUNCTION	0.00709302	0.0016129	6	0	10010	19227
[OVER]	GO:0016668	oxidoreductase activity, acting on a sulfur group of donors, NAD(P) as acceptor	MOLECULAR_FUNCTION	0.00709302	0.0016129	6	0	10010	19227
[OVER]	GO:0008199	ferric iron binding	MOLECULAR_FUNCTION	0.00709302	0.0016129	6	0	10010	19227
[OVER]	GO:0016755	aminoacyltransferase activity	MOLECULAR_FUNCTION	0.00709302	0.0016129	6	0	10010	19227
[OVER]	GO:0003906	DNA-(apurinic or apyrimidinic site) endonuclease activity	MOLECULAR_FUNCTION	0.00709302	0.0016129	6	0	10010	19227
[OVER]	GO:0003955	NAD(P)H dehydrogenase (quinone) activity	MOLECULAR_FUNCTION	0.00709302	0.0016129	6	0	10010	19227
[OVER]	GO:0061134	peptidase regulator activity	MOLECULAR_FUNCTION	0.00709302	0.0016129	6	0	10010	19227
[OVER]	GO:0050145	nucleoside monophosphate kinase activity	MOLECULAR_FUNCTION	0.00709302	0.0016129	6	0	10010	19227
[OVER]	GO:0043022	ribosome binding	MOLECULAR_FUNCTION	0.00730602	0.00166359	13	5	10003	19222
[OVER]	GO:0015298	solute:cation antiporter activity	MOLECULAR_FUNCTION	0.00739851	0.00170753	9	2	10007	19225
[OVER]	GO:0016884	carbon-nitrogen ligase activity, with glutamine as amido-N-donor	MOLECULAR_FUNCTION	0.00739851	0.00170753	9	2	10007	19225
[OVER]	GO:0008374	O-acyltransferase activity	MOLECULAR_FUNCTION	0.00739851	0.00170753	9	2	10007	19225
[OVER]	GO:0016653	oxidoreductase activity, acting on NAD(P)H, heme protein as acceptor	MOLECULAR_FUNCTION	0.00739851	0.00170753	9	2	10007	19225
[OVER]	GO:0140318	protein transporter activity	MOLECULAR_FUNCTION	0.00739851	0.00170753	9	2	10007	19225
[OVER]	GO:0008375	acetylglucosaminyltransferase activity	MOLECULAR_FUNCTION	0.00887641	0.00208154	10	3	10006	19224
[OVER]	GO:0019205	nucleobase-containing compound kinase activity	MOLECULAR_FUNCTION	0.00887641	0.00208154	10	3	10006	19224
[OVER]	GO:0016645	oxidoreductase activity, acting on the CH-NH group of donors	MOLECULAR_FUNCTION	0.00887641	0.00208154	10	3	10006	19224
[OVER]	GO:0016709	oxidoreductase activity, acting on paired donors, with incorporation or reduction of molecular oxygen, NAD(P)H as one donor, and incorporation of one atom of oxygen	MOLECULAR_FUNCTION	0.00887641	0.00208154	10	3	10006	19224
[OVER]	GO:0016831	carboxy-lyase activity	MOLECULAR_FUNCTION	0.0110679	0.00259889	22	15	9994	19212
[OVER]	GO:0051020	GTPase binding	MOLECULAR_FUNCTION	0.0119488	0.00281865	13	6	10003	19221
[OVER]	GO:1904680	peptide transmembrane transporter activity	MOLECULAR_FUNCTION	0.0119488	0.00281865	13	6	10003	19221
[OVER]	GO:0031267	small GTPase binding	MOLECULAR_FUNCTION	0.0119488	0.00281865	13	6	10003	19221
[OVER]	GO:0019239	deaminase activity	MOLECULAR_FUNCTION	0.0119488	0.00281865	13	6	10003	19221
[OVER]	GO:0005253	anion channel activity	MOLECULAR_FUNCTION	0.0126452	0.00309435	7	1	10009	19226
[OVER]	GO:0016405	CoA-ligase activity	MOLECULAR_FUNCTION	0.0126452	0.00309435	7	1	10009	19226
[OVER]	GO:0015108	chloride transmembrane transporter activity	MOLECULAR_FUNCTION	0.0126452	0.00309435	7	1	10009	19226
[OVER]	GO:0004557	alpha-galactosidase activity	MOLECULAR_FUNCTION	0.0126452	0.00309435	7	1	10009	19226
[OVER]	GO:0000976	transcription cis-regulatory region binding	MOLECULAR_FUNCTION	0.0126452	0.00309435	7	1	10009	19226
[OVER]	GO:0016289	CoA hydrolase activity	MOLECULAR_FUNCTION	0.0126452	0.00309435	7	1	10009	19226
[OVER]	GO:0008320	protein transmembrane transporter activity	MOLECULAR_FUNCTION	0.0126452	0.00309435	7	1	10009	19226
[OVER]	GO:0001067	transcription regulatory region nucleic acid binding	MOLECULAR_FUNCTION	0.0126452	0.00309435	7	1	10009	19226
[OVER]	GO:0008131	primary amine oxidase activity	MOLECULAR_FUNCTION	0.0126452	0.00309435	7	1	10009	19226
[OVER]	GO:0008134	transcription factor binding	MOLECULAR_FUNCTION	0.0126452	0.00309435	7	1	10009	19226
[OVER]	GO:0002161	aminoacyl-tRNA editing activity	MOLECULAR_FUNCTION	0.0126452	0.00309435	7	1	10009	19226
[OVER]	GO:0016796	exonuclease activity, active with either ribo- or deoxyribonucleic acids and producing 5'-phosphomonoesters	MOLECULAR_FUNCTION	0.0126452	0.00309435	7	1	10009	19226
[OVER]	GO:0008239	dipeptidyl-peptidase activity	MOLECULAR_FUNCTION	0.0126452	0.00309435	7	1	10009	19226
[OVER]	GO:0022884	macromolecule transmembrane transporter activity	MOLECULAR_FUNCTION	0.0126452	0.00309435	7	1	10009	19226
[OVER]	GO:0005507	copper ion binding	MOLECULAR_FUNCTION	0.0131823	0.003238	12	5	10004	19222
[OVER]	GO:0016790	thiolester hydrolase activity	MOLECULAR_FUNCTION	0.0131823	0.003238	12	5	10004	19222
[OVER]	GO:0016780	phosphotransferase activity, for other substituted phosphate groups	MOLECULAR_FUNCTION	0.0131823	0.003238	12	5	10004	19222
[OVER]	GO:0003774	cytoskeletal motor activity	MOLECULAR_FUNCTION	0.0141434	0.00347845	17	10	9999	19217
[OVER]	GO:0019901	protein kinase binding	MOLECULAR_FUNCTION	0.0165532	0.00412741	8	2	10008	19225
[OVER]	GO:0019900	kinase binding	MOLECULAR_FUNCTION	0.0165532	0.00412741	8	2	10008	19225
[OVER]	GO:0005451	monovalent cation:proton antiporter activity	MOLECULAR_FUNCTION	0.0165532	0.00412741	8	2	10008	19225
[OVER]	GO:0015299	solute:proton antiporter activity	MOLECULAR_FUNCTION	0.0165532	0.00412741	8	2	10008	19225
[OVER]	GO:0016840	carbon-nitrogen lyase activity	MOLECULAR_FUNCTION	0.0165532	0.00412741	8	2	10008	19225
[OVER]	GO:0003954	NADH dehydrogenase activity	MOLECULAR_FUNCTION	0.0165532	0.00412741	8	2	10008	19225
[OVER]	GO:0017056	structural constituent of nuclear pore	MOLECULAR_FUNCTION	0.017693	0.00471061	5	0	10011	19227
[OVER]	GO:0140658	ATP-dependent chromatin remodeler activity	MOLECULAR_FUNCTION	0.017693	0.0047453	9	3	10007	19224
[OVER]	GO:0005200	structural constituent of cytoskeleton	MOLECULAR_FUNCTION	0.017693	0.00471061	5	0	10011	19227
[OVER]	GO:0042162	telomeric DNA binding	MOLECULAR_FUNCTION	0.017693	0.00471061	5	0	10011	19227
[OVER]	GO:0042124	1,3-beta-glucanosyltransferase activity	MOLECULAR_FUNCTION	0.017693	0.00471061	5	0	10011	19227
[OVER]	GO:0001671	ATPase activator activity	MOLECULAR_FUNCTION	0.017693	0.00471061	5	0	10011	19227
[OVER]	GO:0016530	metallochaperone activity	MOLECULAR_FUNCTION	0.017693	0.00471061	5	0	10011	19227
[OVER]	GO:0000977	RNA polymerase II transcription regulatory region sequence-specific DNA binding	MOLECULAR_FUNCTION	0.017693	0.00471061	5	0	10011	19227
[OVER]	GO:0000987	cis-regulatory region sequence-specific DNA binding	MOLECULAR_FUNCTION	0.017693	0.00471061	5	0	10011	19227
[OVER]	GO:0008079	translation termination factor activity	MOLECULAR_FUNCTION	0.017693	0.00471061	5	0	10011	19227
[OVER]	GO:0030544	Hsp70 protein binding	MOLECULAR_FUNCTION	0.017693	0.00471061	5	0	10011	19227
[OVER]	GO:0016273	arginine N-methyltransferase activity	MOLECULAR_FUNCTION	0.017693	0.00471061	5	0	10011	19227
[OVER]	GO:0016274	protein-arginine N-methyltransferase activity	MOLECULAR_FUNCTION	0.017693	0.00471061	5	0	10011	19227
[OVER]	GO:0016278	lysine N-methyltransferase activity	MOLECULAR_FUNCTION	0.017693	0.00471061	5	0	10011	19227
[OVER]	GO:0016279	protein-lysine N-methyltransferase activity	MOLECULAR_FUNCTION	0.017693	0.00471061	5	0	10011	19227
[OVER]	GO:0061631	ubiquitin conjugating enzyme activity	MOLECULAR_FUNCTION	0.017693	0.00471061	5	0	10011	19227
[OVER]	GO:0030600	feruloyl esterase activity	MOLECULAR_FUNCTION	0.017693	0.00471061	5	0	10011	19227
[OVER]	GO:0015038	glutathione disulfide oxidoreductase activity	MOLECULAR_FUNCTION	0.017693	0.00471061	5	0	10011	19227
[OVER]	GO:0004364	glutathione transferase activity	MOLECULAR_FUNCTION	0.017693	0.00471061	5	0	10011	19227
[OVER]	GO:0019104	DNA N-glycosylase activity	MOLECULAR_FUNCTION	0.017693	0.00471061	5	0	10011	19227
[OVER]	GO:1901981	phosphatidylinositol phosphate binding	MOLECULAR_FUNCTION	0.017693	0.0047453	9	3	10007	19224
[OVER]	GO:0042910	xenobiotic transmembrane transporter activity	MOLECULAR_FUNCTION	0.017693	0.00471061	5	0	10011	19227
[OVER]	GO:0016774	phosphotransferase activity, carboxyl group as acceptor	MOLECULAR_FUNCTION	0.017693	0.00471061	5	0	10011	19227
[OVER]	GO:0046556	alpha-L-arabinofuranosidase activity	MOLECULAR_FUNCTION	0.017693	0.00471061	5	0	10011	19227
[OVER]	GO:0003968	RNA-dependent RNA polymerase activity	MOLECULAR_FUNCTION	0.017693	0.00471061	5	0	10011	19227
[OVER]	GO:0043177	organic acid binding	MOLECULAR_FUNCTION	0.017693	0.00471061	5	0	10011	19227
[OVER]	GO:0061135	endopeptidase regulator activity	MOLECULAR_FUNCTION	0.017693	0.00471061	5	0	10011	19227
[OVER]	GO:0003855	3-dehydroquinate dehydratase activity	MOLECULAR_FUNCTION	0.017693	0.00471061	5	0	10011	19227
[OVER]	GO:0033218	amide binding	MOLECULAR_FUNCTION	0.0195131	0.00524251	21	16	9995	19211
[OVER]	GO:0030276	clathrin binding	MOLECULAR_FUNCTION	0.0234758	0.00633617	11	5	10005	19222
[OVER]	GO:0015293	symporter activity	MOLECULAR_FUNCTION	0.0234758	0.00633617	11	5	10005	19222
[OVER]	GO:0003712	transcription coregulator activity	MOLECULAR_FUNCTION	0.0234758	0.00633617	11	5	10005	19222
[OVER]	GO:0003777	microtubule motor activity	MOLECULAR_FUNCTION	0.0234758	0.00633617	11	5	10005	19222
[OVER]	GO:0015923	mannosidase activity	MOLECULAR_FUNCTION	0.0275976	0.00745294	13	7	10003	19220
[OVER]	GO:0004176	ATP-dependent peptidase activity	MOLECULAR_FUNCTION	0.0281063	0.00797699	6	1	10010	19226
[OVER]	GO:0140612	DNA damage sensor activity	MOLECULAR_FUNCTION	0.0281063	0.00797699	6	1	10010	19226
[OVER]	GO:0140664	ATP-dependent DNA damage sensor activity	MOLECULAR_FUNCTION	0.0281063	0.00797699	6	1	10010	19226
[OVER]	GO:0060089	molecular transducer activity	MOLECULAR_FUNCTION	0.0281063	0.00797699	6	1	10010	19226
[OVER]	GO:0005244	voltage-gated ion channel activity	MOLECULAR_FUNCTION	0.0281063	0.00797699	6	1	10010	19226
[OVER]	GO:0005254	chloride channel activity	MOLECULAR_FUNCTION	0.0281063	0.00797699	6	1	10010	19226
[OVER]	GO:0016408	C-acyltransferase activity	MOLECULAR_FUNCTION	0.0281063	0.00797699	6	1	10010	19226
[OVER]	GO:0016409	palmitoyltransferase activity	MOLECULAR_FUNCTION	0.0281063	0.00797699	6	1	10010	19226
[OVER]	GO:0016891	endoribonuclease activity, producing 5'-phosphomonoesters	MOLECULAR_FUNCTION	0.0281063	0.00797699	6	1	10010	19226
[OVER]	GO:0016822	hydrolase activity, acting on acid carbon-carbon bonds	MOLECULAR_FUNCTION	0.0281063	0.00797699	6	1	10010	19226
[OVER]	GO:0016823	hydrolase activity, acting on acid carbon-carbon bonds, in ketonic substances	MOLECULAR_FUNCTION	0.0281063	0.00797699	6	1	10010	19226
[OVER]	GO:0003688	DNA replication origin binding	MOLECULAR_FUNCTION	0.0281063	0.00797699	6	1	10010	19226
[OVER]	GO:0022832	voltage-gated channel activity	MOLECULAR_FUNCTION	0.0281063	0.00797699	6	1	10010	19226
[OVER]	GO:0008169	C-methyltransferase activity	MOLECULAR_FUNCTION	0.0281063	0.00797699	6	1	10010	19226
[OVER]	GO:0008172	S-methyltransferase activity	MOLECULAR_FUNCTION	0.0281063	0.00797699	6	1	10010	19226
[OVER]	GO:0051087	chaperone binding	MOLECULAR_FUNCTION	0.0281063	0.00797699	6	1	10010	19226
[OVER]	GO:0034511	U3 snoRNA binding	MOLECULAR_FUNCTION	0.0281063	0.00797699	6	1	10010	19226
[OVER]	GO:0004725	protein tyrosine phosphatase activity	MOLECULAR_FUNCTION	0.0281063	0.00797699	6	1	10010	19226
[OVER]	GO:0048038	quinone binding	MOLECULAR_FUNCTION	0.0281063	0.00797699	6	1	10010	19226
[OVER]	GO:0019208	phosphatase regulator activity	MOLECULAR_FUNCTION	0.0281063	0.00797699	6	1	10010	19226
[OVER]	GO:0003727	single-stranded RNA binding	MOLECULAR_FUNCTION	0.0281063	0.00797699	6	1	10010	19226
[OVER]	GO:0003887	DNA-directed DNA polymerase activity	MOLECULAR_FUNCTION	0.0281063	0.00797699	6	1	10010	19226
[OVER]	GO:0031625	ubiquitin protein ligase binding	MOLECULAR_FUNCTION	0.0339651	0.00978157	7	2	10009	19225
[OVER]	GO:0004100	chitin synthase activity	MOLECULAR_FUNCTION	0.0339651	0.00978157	7	2	10009	19225
[OVER]	GO:0004190	aspartic-type endopeptidase activity	MOLECULAR_FUNCTION	0.0339651	0.00978157	7	2	10009	19225
[OVER]	GO:0070001	aspartic-type peptidase activity	MOLECULAR_FUNCTION	0.0339651	0.00978157	7	2	10009	19225
[OVER]	GO:0016722	oxidoreductase activity, acting on metal ions	MOLECULAR_FUNCTION	0.0339651	0.00978157	7	2	10009	19225
[OVER]	GO:0048029	monosaccharide binding	MOLECULAR_FUNCTION	0.0339651	0.00978157	7	2	10009	19225
[OVER]	GO:0140312	cargo adaptor activity	MOLECULAR_FUNCTION	0.0339651	0.00978157	7	2	10009	19225
[OVER]	GO:0070566	adenylyltransferase activity	MOLECULAR_FUNCTION	0.0339651	0.00978157	7	2	10009	19225
[OVER]	GO:0044389	ubiquitin-like protein ligase binding	MOLECULAR_FUNCTION	0.0339651	0.00978157	7	2	10009	19225
[OVER]	GO:0005085	guanyl-nucleotide exchange factor activity	MOLECULAR_FUNCTION	0.0349762	0.010089	15	10	10001	19217
[OVER]	GO:0016684	oxidoreductase activity, acting on peroxide as acceptor	MOLECULAR_FUNCTION	0.0349762	0.010089	15	10	10001	19217
[OVER]	GO:0004601	peroxidase activity	MOLECULAR_FUNCTION	0.0349762	0.010089	15	10	10001	19217
[OVER]	GO:0016878	acid-thiol ligase activity	MOLECULAR_FUNCTION	0.0365625	0.0105804	8	3	10008	19224
[OVER]	GO:0015925	galactosidase activity	MOLECULAR_FUNCTION	0.0426027	0.0123547	10	5	10006	19222
[OVER]	GO:0004033	aldo-keto reductase (NADP) activity	MOLECULAR_FUNCTION	0.0443855	0.0137568	4	0	10012	19227
[OVER]	GO:0140828	metal cation:monoatomic cation antiporter activity	MOLECULAR_FUNCTION	0.0443855	0.0137568	4	0	10012	19227
[OVER]	GO:0030295	protein kinase activator activity	MOLECULAR_FUNCTION	0.0443855	0.0137568	4	0	10012	19227
[OVER]	GO:0016151	nickel cation binding	MOLECULAR_FUNCTION	0.0443855	0.0137568	4	0	10012	19227
[OVER]	GO:0005227	calcium activated cation channel activity	MOLECULAR_FUNCTION	0.0443855	0.0137568	4	0	10012	19227
[OVER]	GO:0120013	lipid transfer activity	MOLECULAR_FUNCTION	0.0443855	0.0137568	4	0	10012	19227
[OVER]	GO:0018580	nitronate monooxygenase activity	MOLECULAR_FUNCTION	0.0443855	0.0137568	4	0	10012	19227
[OVER]	GO:0018576	catechol 1,2-dioxygenase activity	MOLECULAR_FUNCTION	0.0443855	0.0137568	4	0	10012	19227
[OVER]	GO:0031491	nucleosome binding	MOLECULAR_FUNCTION	0.0443855	0.0137568	4	0	10012	19227
[OVER]	GO:0016504	peptidase activator activity	MOLECULAR_FUNCTION	0.0443855	0.0137568	4	0	10012	19227
[OVER]	GO:0005548	phospholipid transporter activity	MOLECULAR_FUNCTION	0.0443855	0.0137568	4	0	10012	19227
[OVER]	GO:0000702	oxidized base lesion DNA N-glycosylase activity	MOLECULAR_FUNCTION	0.0443855	0.0137568	4	0	10012	19227
[OVER]	GO:0016886	ligase activity, forming phosphoric ester bonds	MOLECULAR_FUNCTION	0.0443855	0.0137568	4	0	10012	19227
[OVER]	GO:0016857	racemase and epimerase activity, acting on carbohydrates and derivatives	MOLECULAR_FUNCTION	0.0443855	0.0137568	4	0	10012	19227
[OVER]	GO:0016863	intramolecular oxidoreductase activity, transposing C=C bonds	MOLECULAR_FUNCTION	0.0443855	0.0137568	4	0	10012	19227
[OVER]	GO:0016864	intramolecular oxidoreductase activity, transposing S-S bonds	MOLECULAR_FUNCTION	0.0443855	0.0137568	4	0	10012	19227
[OVER]	GO:0001056	RNA polymerase III activity	MOLECULAR_FUNCTION	0.0443855	0.0137568	4	0	10012	19227
[OVER]	GO:0008514	organic anion transmembrane transporter activity	MOLECULAR_FUNCTION	0.0443855	0.013206	12	7	10004	19220
[OVER]	GO:0019203	carbohydrate phosphatase activity	MOLECULAR_FUNCTION	0.0443855	0.0137568	4	0	10012	19227
[OVER]	GO:0022839	ion gated channel activity	MOLECULAR_FUNCTION	0.0443855	0.0137568	4	0	10012	19227
[OVER]	GO:0019114	catechol dioxygenase activity	MOLECULAR_FUNCTION	0.0443855	0.0137568	4	0	10012	19227
[OVER]	GO:0016624	oxidoreductase activity, acting on the aldehyde or oxo group of donors, disulfide as acceptor	MOLECULAR_FUNCTION	0.0443855	0.0137568	4	0	10012	19227
[OVER]	GO:0004650	polygalacturonase activity	MOLECULAR_FUNCTION	0.0443855	0.0137568	4	0	10012	19227
[OVER]	GO:0016679	oxidoreductase activity, acting on diphenols and related substances as donors	MOLECULAR_FUNCTION	0.0443855	0.0137568	4	0	10012	19227
[OVER]	GO:0016671	oxidoreductase activity, acting on a sulfur group of donors, disulfide as acceptor	MOLECULAR_FUNCTION	0.0443855	0.0137568	4	0	10012	19227
[OVER]	GO:0008137	NADH dehydrogenase (ubiquinone) activity	MOLECULAR_FUNCTION	0.0443855	0.0137568	4	0	10012	19227
[truncated: 18 more rows]

## Sheet: Table S3
Tags	Annotation	FDR	P-Value	Nr Test	Nr Reference	Non Annot Test	Non Annot Reference
[OVER]	CE5.hmm	2.03098e-05	1.09783e-07	14	0	10002	21433
[OVER]	GH47.hmm	0.000315121	3.40672e-06	11	0	10005	21433
[OVER]	GH2.hmm	0.000660077	1.0704e-05	10	0	10006	21433
[OVER]	GT2.hmm	0.000665891	1.79971e-05	13	2	10003	21431
[OVER]	GH76.hmm	0.000665891	1.79971e-05	13	2	10003	21431
[OVER]	GH3.hmm	0.00130124	4.22024e-05	17	6	9999	21427
[OVER]	CE1.hmm	0.00179045	6.77467e-05	13	3	10003	21430
[OVER]	GT90.hmm	0.0097028	0.000681818	8	1	10008	21432
[OVER]	AA9.hmm	0.0097028	0.000499764	17	9	9999	21424
[OVER]	CE3.hmm	0.0097028	0.00049403	12	4	10004	21429
[OVER]	GH72.hmm	0.0097028	0.000681818	8	1	10008	21432
[OVER]	GH31.hmm	0.0097028	0.000681818	8	1	10008	21432
[OVER]	CE4.hmm	0.0097028	0.000681818	8	1	10008	21432
[OVER]	GH7.hmm	0.0137761	0.00104251	6	0	10010	21433
[OVER]	AA7.hmm	0.0214485	0.00173906	30	28	9986	21405
[OVER]	GH92.hmm	0.0221485	0.00191555	7	1	10009	21432
[OVER]	AA2.hmm	0.0251728	0.00244924	8	2	10008	21431
[OVER]	AA8.hmm	0.0251728	0.00244924	8	2	10008	21431
[OVER]	GH10.hmm	0.0288466	0.00327448	5	0	10011	21433
[OVER]	AA11.hmm	0.0288466	0.00327448	5	0	10011	21433
[OVER]	GT4.hmm	0.0288466	0.00327448	5	0	10011	21433

## Sheet: Table S4
A	Apiospora malaysiana	Apiospora koreanum KUC21332	Apiospora arundinis IBT 11852	Apiospora arundinis IBT 41787	Apiospora arundinis IBT 7813	Apiospora arundinis CBS 45092	Apiospora arundinis CBS 124788	Apiospora aurea CBS 244.83	Apiospora hydei CBS 114990	Apiospora kogelbergensis CBS 113332	Apiospora kogelbergensis CBS 117206	Apiospora marii CBS 497.90	Apiospora marii CBS 200.57	Apiospora phaeosperma CBS 142.55	Apiospora sphaeosperma	Apiospora phragmitis CBS 135458	Apiospora pterosperma CBS 123185	Apiospora rasikravindrae CBS 337.61	Apiospora saccharicola CBS 831.71	Apiospora saccharicola CBS 334.86	Apiospora arundinis AAU 773
PKS1	gene_03546/MAPSAVNGRDTFGQTNGHANGLTNGVGTNGMNGTANGHGAGLNGSSTINGSHHRVGDAFPEETPATSNGMATETSRPKTKPMPLAIVGMSCRLPGNVSSAAEFWELCARARSGYSTIPKSRFDMSSFQHPNPGKAGCHNPVGGHFLSDESVDLAAFDAPFFSLTEKEAISMDPQQRLLLECTFEALENAGVPKHTIVGKDVGVFVGGSFPEYESHCFRDTDRIPMHQATGCAYAMQSNRLSHFFDLKGPSFTTDTACSSSLVALHLACQSLRAGESSMAIVGGCHLNMLPEFWISFAKSRLFSDSGRSYSFDNRGTGFGRGEGCGMIILKPLDQARRDNDSIRAVIVGSGINQDGKTPGITMPCGTAQENLMRQVYQNAGIKPSDTGF…	gene_03477/MAPSAVNGHDTFGQANGHVNGLGNGVTTNGTNGAVNGHHNGLNGASIINGGHHRVGDVSPGETATPSNGMTTGVPKPKAKPMPLAIVGMSCRLPGNVASAAEFWELCARARSGYSTIPKSRFDASSFQHPNPGKAGCHNPVGGHFLSDESVDLAAFDAPFFSLTEKEAISMDPQQRLLLECTFEALENAGVPKHTIVGKDVGVFVGGSFPEYESHCFRDPDRIPMHQATGCAYAMQSNRLSHFFDLKGPSFTTDTACSSSLVALHLACQSLRAGESSMAIVGGCHLNMLPEFWISFAKSRLFSDSGRSYSFDNRGTGFGRGEGCGMIVLKPLDQARRDNDSIRAVIVGSGINQDGKTPGITMPCGTAQETLMRQVYQNAGIKPSDTGF…	gene_07393/MAPSAVNGHDTSGQANGHTNGLNNGVGTNGMNSRANGMNGTANGHENGLNGDSSINGGHRRVGDAFPGETHATSNGVAPETTKPKTKPMPLAIVGMSCRLPGNVASAAEFWELCARARSGYSTIPKSRFDTSSFQHPNPGKAGCHNPVGGHFLSDESVDLAAFDAPFFSLTEKEAISMDPQQRLLLECTFEALENAGVPKHTIVGKDVGVFVGGSFPEYESHCFRDTDRIPMHQATGCAYAMQSNRLSHFFDLKGPSFTTDTACSSSLVALHLACQSLRAGESSMAIVGGCHLNMLPEFWISFAKSRLFSDSGRSYSFDSRGTGFGRGEGCGMIILKPLDQARRDNDSIRAVIVGSGINQDGKTPGITMPCGTAQEALMRQVYQNAGI…	gene_06655/MAPSAVNGHDTSGQANGHTNGLNNGVGTNGMNGRANGMNGTANGHENGLNGDSSINGGHRRVGDAFPGETHATSNGVAPETTKPKTKPMPLAIVGMSCRLPGNVASAAEFWELCARARSGYSTIPKSRFDTSSFQHPNPGKAGCHNPVGGHFLSDESVDLAAFDAPFFSLTEKEAISMDPQQRLLLECTFEALENAGVPKHTIVGKDVGVFVGGSFPEYESHCFRDTDRIPMHQATGCAYAMQSNRLSHFFDLKGPSFTADTACSSSLVALHLACQSLRAGESSMAIVGGCHLNMLPEFWISFAKSRLFSDSGRSYSFDNRGTGFGRGEGCGMIILKPLDQARRDNDSIRAVIVGSGINQDGKTPGITMPCGTAQETLMRQVYQNAGI…	gene_16274/MAPSAVNGHDTSGQANGHTNGLNNGVGTNGMNSRANGMNGTANGHENGLNGDSSINGGHRRVGDAFPGETHATSNGVAPETTKPKTKPMPLAIVGMSCRLPGNVASAAEFWELCARARSGYSTIPKSRFDTSSFQHPNPGKAGCHNPVGGHFLSDESIDLAAFDAPFFSLTEKEAISMDPQQRLLLECTFEALENAGVPKHTIVGKDVGVFVGGSFPEYESHCFRDTDRIPMHQATGCAYAMQSNRLSHFFDLKGPSFTTDTACSSSLVALHLACQSLRAGESSMAIVGGCHLNMLPEFWISFAKSRLFSDSGRSYSFDSRGTGFGRGEGCGMIILKPLDQARRDNDSIRAVIVGSGINQDGKTPGITMPCGTAQETLMRQVYQNAGI…	gene_13662/MAPSAVNGHDTSGQANGHTNGLNNGVGTNGMNGRANGMNGTANGHENGLNGDSSINGGHRRVGDAFPGETHATSNCVAPETTKPKTKPMPLAIVGMSCRLPGNVASAAEFWELCARARSGYSTIPKSRFDTSSFQHPNPGKAGCHNPVGGHFLSDESVDLAAFDAPFFSLTEKEAISMDPQQRLLLECTFEALENAGVPKHTIVGKDVGVFVGGSFPEYESHCFRDTDRIPMHQATGCAYAMQSNRLSHFFDLKGPSFTTDTACSSSLVALHLACQSLRAGESSMAIVGGCHLNMLPEFWISFAKSRLFSDSGRSYSFDSRGTGFGRGEGCGMIILKPLDQARRDNDSIRAVIVGSGINQDGKTPGITMPCGTAQETLMRQVYQNAGI…	gene_05700/MRQVYQNAGIKPSDTGFIEAHGTGTRVGDPIEATAIHNVFGANRSARDPLLLGSVKSNIGHLEGASGIVAVIKAAMMLERGFVLPNYDFAHPNEKIPFKDWHMKVPVNQRPWPRNKKYVSVNNFGFGGTNAHVVLERLPFTQRGGPKNDADLKDEDPGRMLFAMSANDKASLESVMKQLVIYLEQRPEMFQKDLMSNVAYTLCQRRSLLQWRVAIPAKRSFDLIDAINSQKFVAGKESDPLRIGFIFTGQGAQWYGMGRELYEHYPVFTKAIDYADQCLASLGAPWSLVEELSKDEKTTAVGAAHISQPSCTAIQLALTDLLFSWGVRPTAVAGHSSGEIGAAYAAGILTFEACVAIAYHRGRLIPVLKERHPELRGAMMAVGGTKEE…	gene_03946/MAPSAVDGRDNFEQVNGRANGLGNGVSASGMNGTTNGHDADVSRGRANGHRRVGDAFPGEAPAPPTDGVTPETPKPKSKPMPLAIVGISCRLPGNVSSAAEFWELCARARSGYSPIPKSRFDASSFQHPNPGRAGCHNPAGGHFLSDESVDLAAFDAPFFSLTEKEAISMDPQQRLLLECSFEALENAGVPKHTIVGKDVGVFVGGSFPEYESHCFRDTDRIPMHQATGCAYAMQSNRLSHFFDLKGPSFTTDTACSSSLVALHLACQSLRAGESSMAIVGGCHLNMLPEFWISFAKSRLFSDSGRSYSFDNRGTGFGRGEGCGMIIVKPLDQARRDNDSIRAIIVGSGINQDGKTPGITMPCGTAQENLMRQVYKNAGINPSDTGFI…	gene_15089/MAPSAVNGHDNFEQVNGHINGLGNGVSANSMNGTPNGQHAEMSRGRATGHRRVGDAFPGETPAPPTNGITTETPKAKSKPMPLAIVGMSCRLPGNVSSAAEFWELCARARSGYSPIPKSRFDASSFQHPNPGKAGCHNPVGGHFLSDESVDLAAFDAPFFSLTEKEAISMDPQQRLLLECTFEALENAGVPKHTIVGKDVGVFVGGSFPEYESHCFRDTDRIPMHQATGCAYAMQSNRLSHFFDLKGPSFTTDTACSSSLVALHLACQSLRAGESSMAIVGGCHLNMLPEFWISFAKSRLFSDSGRSYSFDNRGTGFGRGEGCGMIILKPLEQARRDNDSIRAVIVGSGINQDGKTPGITMPCGTAQENLMRQVYKNADINPSDTGFI…	gene_05239/MAPSAVNGHNTLEQVNGHTNGLSNGVGSNGTSDTFNGHDTGLNGGSPINGGHHRVGDAFPGETVSPKNGETTGVPKLTAKPVPLAIVGMSCRLPGNVSSASEFWELCARARSGYSAIPKSRFDASSFQHPNPGKAGCHNPVGGHFLSDESVDLAAFDAPFFSLTEKEAISMDPQQRLLLECTFEALENAGVPKHTIVGKDVGVFVGGSFPEYESHCFRDTDRIPMHQATGCAYAMQSNRLSHFFDLKGPSFTTDTACSSSLVALHLACQSLRSGESSMAIVGGCHLNMLPEFWISFAKSRLFSDSGRSYSFDNRGTGFGRGEGCGMIILKPLDQARLDNDSIRAVIVGNGINQDGKTPGITMPCGTAQETLMRQVYQNAGIKPSDTGF…	gene_12964/MAPSAVNGHNTLEQVNGHTNGLSNGVGSNGTSDTFNGHDTGLNGGSPINGGHHRVGDAFPGETVSPKNGETTGVPKLTAKPVPLAIVGMSCRLPGNVSSASEFWELCARARSGYSAIPKSRFDASSFQHPNPGKAGCHNPVGGHFLSDESVDLAAFDAPFFSLTEKEAISMDPQQRLLLECTFEALENAGVPKHTIVGKDVGVFVGGSFPEYESHCFRDTDRIPMHQATGCAYAMQSNRLSHFFDLKGPSFTTDTACSSSLVALHLACQSLRSGESSMAIVGGCHLNMLPEFWISFAKSRLFSDSGRSYSFDNRGTGFGRGEGCGMIILKPLDQARLDNDSIRAVIVGNGINQDGKTPGITMPCGTAQETLMRQVYQNAGIKPSDTGF…	gene_14737/MAPSAVNGHGPYAQANGRPNGLGNGVSTNGMNGTPNGLGTGHRRVGDAFPGETSAPTNRVTTEASTPKTKPMPLAIVGMSCRLPGNVTSAAEFWELCARARSGYSTIPKSRFDASSFQHPNPGKAGCHNPVGGHFLSDETVDLAAFDAPFFSLTEKEAISMDPQQRLLLECTFEALENAGVPKHTIVGKDVGVFVGGSFPEYESHCFRDTDRIPMHQATGCAYAMQSNRLSHFFDLKGPSFTTDTACSSSLVALHLACQSLRAGESSMAIVGGCHLNMLPEFWISFAKSRLFSDSGRSYSFDNRGTGFGRGEGCGMIILKPLEQARRDNDSIRAIIVGSGINQDGKTPGITMPCGTAQENLMRQVYQNADINPSDTGFIEAHGTGTRV…	gene_14661/MAPSAVNGHGPYAQANGRPNGLGNGVSTNGMNGTPNGLGTGHRRVGDALPGETSAPTNGVTTEASTPKTKPMPLAIVGMSCRLPGNVTSAAEFWELCARARSGYSTIPKSRFDASSFQHPNPGKAGCHNPVGGHFLSDETVDLAAFDAPFFSLTEKEAISMDPQQRLLLECTFEALENAGVPKHTIVGKDVGVFVGGSFPEYESHCFRDTDRIPMHQATGCAYAMQSNRLSHFFDLKGPSFTTDTACSSSLVALHLACQSLRAGESSMAIVGGCHLNMLPEFWISFAKSRLFSDSGRSYSFDNRGTGFGRGEGCGMIILKPLEQARRDNDSIRAIIVGSGINQDGKTPGITMPCGTAQENLMRQVYQNADINPSDTGFIEAHGTGTRV…	gene_05217/MAPSAVNGHDSFAQANGRPNGLANGVSTNGMSGTPNGLGTGHRRVGDAFPGETPAATNGVATEAPKPKTKPIPLAIVGMSCRLPGNVTTAAEFWELCARARSGYSTIPKSRFDALSFQHPNPGKAGCHNPVGGHFLSDETADLAAFDAPFFSLTEKEAISMDPQQRLLLECTFEALENAGVPKHAIVGKDVGVFVGGSFPEYESHCFRDTDRIPMHQATGCAYAMQSNRLSHFFDLKGPSFTTDTACSSSLVALHLACQSLRAGESSMAIVGGCHLNMLPEFWISFAKSRLFSDSGRSYSFDNRGTGFGRGEGCGMIILKPLEQARRDNDSIRAIIVGSGINQDGKTPGITMPCGTAQENLMRQVYQNAGINPSDTGFIEAHGTGTRV…	gene_00059/MAPSAVNGHGPYAQANGRPNGLGNGVSTNGMNGTPNGLGTGHRRVGDAFPGETPAPTNGVTTEASKPKTKPMPLAIVGMSCRLPGNVTTAAEFWELCARARSGYSTIPKSRFDASSFQHPNPGKAGCHNPVGGHFLSDETVDLAAFDAPFFSLTEKEAISMDPQQRLLLECTFEALENAGVPKHTIVGKDVGVFVGGSFPEYESHCFRDTDRIPMHQATGCAYAMQSNRLSHFFDLKGPSFTTDTACSSSLVALHLACQSLRAGESSMAIVGGCHLNMLPEFWISFAKSRLFSDSGRSYSFDNRGTGFGRGEGCGMIILKPLEQARRDNDSIRAIIVGSGINQDGKTPGITMPCGTAQENLMRQVYQNADINPSDTGFIEAHGTGTRV…	gene_09828/MAPSAVNGHGSFEQANGRTNGLGNGVSANGMNGTPNGHDTNMDGSSTSGGGHHRVGDAFPGETPSPTNGVKMETPEPKTKPMPLAIVGMSCRLPGNVSSAAEFWELCARARSGYTTIPKSRFDTSSFQHPNPGKAGCHNPVGGHFLSDESVDLAAFDAPFFSLTEKEAISMDPQQRLLLECTFEALENAGVPKHTIVGKDVGVFVGGSFPEYESHCFRDTDRIPMHQATVYENAGINPSDTGFIEAHGTGTRVGDPIEATANDKTSLESVLKQLVIYLEQRPEMFQKDLMSNVAYTLCQRRSLLQWRVAIPAKRSFDLIDAINSQKFVPGKESDPLRIGFIFTGQGAQWYGMGRELYDQYPVFTKAMDYADQCLVSLGATWSLIEELH…	gene_12133/MAPSAVNGHGSFGQANGHTNGLGNGVSTNGMNGTTNGHATDLDGASTSSRGHRRVGDAFPGETPAPSNSAKTEAPKPKTKAMPLAIVGMSCRLPGNVASAAEFWELCARARSGYSTIPKSRFDASSFQHPNPGKAGCHNPVGGHFLSDDSVDLAAFDAPFFSLTEKEAISMDPQQRLLLECTFEALENAGVPKQAIVGKDVGVFVGGSFPEYESHCFRDTDRIPMHQATGCAYAMQSNRLSHFFDLKGPSFTTDTACSSSLVALHLACQSLRAGESSMAIVGGCHLNMLPEFWVSFAKSRLFSDSGRSYSFDNRGTGFGRGEGCGMIILKPLDQARRDNDSIRAVIMGSGINQDGKTPGITMPCGTAQETLMRQVYENAGISPSDTGF…	gene_08897/MAPSAVNGHGTFEHANGRTNGLDNGVRTNGVNGALNSHRRVGEAFPGETPLPPTNGTPTTPDAPQPKPKPMPLAIVGMSCRLPGNVSSAAEFWELCARARSGYSAIPKSRFDAASFQHPNPGKAGCHNPVGGHFLSDESVDLAAFDAPFFSLTEKEAISMDPQQRLLLECTFEALENAGVPRHTIVGKDVGVFVGGSFPEYESHCFRDTDRIPMHQATGCAYAMQSNRLSHFFDLKGPSFTTDTACSSSLVALHLACQSLRAGESSMAIVGGCHLNMLPEFWISFAKSRLFSDSGRSYSFDNRGTGFGRGEGCGMIILKPLEQARRDNDSIRAIIVGSGINQDGKTPGITMPCGTAQETLMRQVYTNAGINPSDTGFIEAHGTGTRVG…	gene_13871/MAPSAVNGNGSFAQANGHTNGLGNGVSTNGMNGTPNGLGTGHRRVGDAFPGGTPSSTYGIATEMPKPKTKPLPLAIVGMSCRLPGNVSSAAEFWELCARARSGYSTIPKSRFDASSFQHPNPGKAGCHNPVGGHFLSDETVDLAAFDAPFFSLTEKEAISMDPQQRLLLECTFEALENAGVPKHTIVGKDVGVFVGGSFPEYESHCFRDADRIPMHQATGCAYAMQSNRLSHFFDLKGPSFTTDTACSSSLVALHLACQSLRAGESSMAIVGGCHLNMLPEFWISFAKSRLFSDSGRSYSFDNRGTGFGRGEGCGMIILKPLEQARLDNDSIRAIIVGSGINQDGKTPGITMPCGTAQENLMRQVYQNAGINPSDTGFIEAHGTGTRV…	gene_13678/MAPSAVNGNGSFAQANGHTNGLGNGVSTNGMNGTPNGLGTGHRRVGDAFPGGTPSSTYGIATEMPKPKTKPLPLAIVGMSCRLPGNVSSAAEFWELCARARSGYSTIPKSRFDASSFQHPNPGKAGCHNPVGGHFLSDETVDLAAFDAPFFSLTEKEAISMDPQQRLLLECTFEALENAGVPKHTIVGKDVGVFVGGSFPEYESHCFRDADRIPMHQATGCAYAMQSNRLSHFFDLKGPSFTTDTACSSSLVALHLACQSLRAGESSMAIVGGCHLNMLPEFWISFAKSRLFSDSGRSYSFDNRGTGFGRGEGCGMIILKPLEQARLDNDSIRAIIVGSGINQDGKTPGITMPCGTAQENLMRQVYQNAGINPSDTGFIEAHGTGTRV…	gene_10670/MAPSAVNGHDTSGQANGHTNGLNNGVGTNGMNGRANGMNGTANGHENGLNGDSSINGGHRRVGDAFPGETHATSNCVAPETTKPKTKPMPLAIVGMSCRLPGNVASAAEFWELCARARSGYSTIPKSRFDTSSFQHPNPGKAGCHNPVGGHFLSDESVDLAAFDAPFFSLTEKEAISMDPQQRLLLECTFEALENAGVPKHTIVGKDVGVFVGGSFPEYESHCFRDTDRIPMHQATGCAYAMQSNRLSHFFDLKGPSFTTDTACSSSLVALHLACQSLRAGESSMAIVGGCHLNMLPEFWISFAKSRLFSDSGRSYSFDSRGTGFGRGEGCGMIILKPLDQARRDNDSIRAVIVGSGINQDGKTPGITMPCGTAQETLMRQVYQNAGI…
PKS2	gene_07713/MYTQRQPEPIAIIGTSCRFTGGATSPSKLWDLLSDPTNLTREVPADRFNAEAFYHPDGEHHGTTNSIRGYWLEQDIRKFDAGFFNITPREAEAIDPQQRLLLEVVYEAMEASGYSMTHLSGEDVAVFAGVMTADYDTLSQRDELSTSQYYATGNARSIIANRISYFFNFRGPSLTIDTACSSSLVALHQAVLSLRAQESKMACVTGVNLMITPEQFIVESSLHMLSPSGRCQMWDVNADGYARGEGVAAIFIKTLSQALADGDQIEGVIRGTGVGSDGRTQGITMPNSEAQASLIRQTYARAGLDLSIAEDRCQYFEAHGTGTQVGDPREAKAIDEAFFGASDIMGATDDKLLVGSIKTIIGHTEGAAGLAGVLKVLQAMKHGSVPPN…	gene_05203/MYTQRQPEPIAIIGTGCRFTGGATSPSKLWDLLADPTDLTREVPQDRFNAEAFYHPNGEHHGTTNSIRGYWLEQDIRKFDAGFFNITPREAEAIDPQQRLLLEVVYEAMESSGYSMNRLSGEDVAVFAGVMTADYDTLSQRDELSTSQYYATGNARSIIANRVSYFFNFRGPSLTIDTACSSSLVALHQAVLSLRAQDSKMACVTGVNLMFTPEQFIVESSLHMLSPSGRCQMWDVNADGYARGEGVAAIFIKTLSQALADGDKIEGIIRNTGVGSDGRTQGITMPNSEAQASLIMQTYARAGLDPKLAEDRCQYFEAHGTGTQAGDPREAKAIEEAFFNTSGGKKDIDKVSSDKLLVGSVKTIIGHTEGAAGLAGVLKVLQAMKHGH…	gene_12321/MYTQRQPEPIAIIGTSCRFTGGATSPSKLWDLLSDPTDLTREVPKDRFNAEAFYHPDGEHHGTTNSIRGYWLEQDIQKFDAGFFNITPREAEAIDPQQRLLLEVVYKAMEASGYSMTHLSGEDVAVFAGVMTADYDTLSQRDELSTSQYYATGNARSIIANRVSYFFNFRGPSLTIDTACSSSLVALHQAVLSLRAQESKMACVTGVNLMLTPEQFIVESSLHMLSPSGRCQMWDVNADGYARGEGVAAIFIKTLSQALADGDKIEGIIRGTGVGSDGRTQGITMPNSEAQASLIRQTYARAGLDPSIAEDRCQYFEAHGTGTQVGDPREAKAIEEAFFGTSDNTEATDDKLLVGSIKTIIGHTEGAAGLAGVLKVLQAMKHGSVPPN…	gene_13461/MQQIKDHSWQLASARADCHYRDQLSVHRRRHVPSKLWDLLSDPTDLTREVPKDRFNAEAFYHPDGEHHGTTNSIRGYWLEQDIRKFDAGFFNITPREAEAIDPQQRLLLEVVYEAMEASGYSMAHLSGEDVAVFAGVMTADYDTLSQRDELSTSQYYATGNARSIIANRVSYFFNFRGPSLTIDTACSSSLVALHQAVLSLRAQESKMACVTGVNLMLTPEQFIVESSLHMLSPSGRCQMWDVNADGYARGEGVAAIFIKTLSQALADGDKIEGIIRGTGVGSDGRTQGITMPNSEAQASLIRHTYARAGLDPSIAEDRCQYFEAHGTGTQVGDPREAKAIEEAFFGTSEATDDKLLVGSIKTIIGHTEGAAGLAGVLKVLQAMKHGS…	gene_15799/MRNLIQYLKQNPSVTHQQLGWHLYAKRTALSYRVAFSANSSAEAIALMESSLKGTNDLGTRAQTLHQKPRVLGIFTGQGAQWATMSRFLLQSNGSYRDTINSLDRFLQVCPDPPSWTLAEQILAGPEDSRINEAAISQSLCTALQIALVDILISYGLEFHTVVGHSSGEISAAYAGGRLSARDAILISYYRGMFAHLAGGLTGEKGGMIAVGLSESEAFDFCQDPEFGGRLCVAASNAPSSVTLSGDLDMIHLAQDKLTQQKKFARVLVVDTAYHSPHMIRPAAEYVKALQKCGIRPLAGGNGTNWISSVSELSRTDENRDIGITYWKDNMVFAVKFHDAIKTAIMEHGPFDCAIEVGPHPALKGPTTQTAKSLNGGTLLYSGVLDRT…	gene_02731/MYTQRQPEPIAIIGTSCWFTGGATSPSKLWDLLSDPTDLTRKVPKDRFNAEAFYHPDGEHHGTTNSIRGYWLEQDIRKFDAGFFNITPREAEAIDPQQRLLLEVVYEAMEASGYSMTHLSGEDVAVFAGVMTADYDTLSQRDELSTSQYYATGNARSIIANRVSYFFNFRGPSLTIDTACSSSLVALHQAVLSLRAQESKMACVTGVNLMLTPEQFIVESSLHMLSPSGRCQMWDVNADGYARGEGVAAIFIKTLSQALADGDKIEGIIRGTGVGSDGRTQGITMPNSEAQASLIRKTYARAGLDPSIAEDRCQYFEAHGTGTQVGDPREAKAIEEAFFGASVNTETTDDKLLVGSIKTIIGHTEGAAGLAGVLKVLQAMKHGSVPPN…	gene_14473/MYTQRQPEPIAIIGTNCRFTGGATSPSKLWDLLSDPTDLTREVPKDRFNAEAFYHPDGEHHGTTNSIRGYWLEQDIRKFDAGFFNITPREAEAIDPQQRLLLEVVYEAMEASGYSMAHLSGEDVAIFAGVMTADYDTLSQRDELSTSQYYATGNARSIIANRVSYFFNFRGPSLTIDTACSSSLVALHQAVLSLRAQESKMACVTGVNLMLTPEQFIVESSLHMLSPSGRCQMWDVNADGYARGEGVAAIFIKTLSQALADGDKIEGIIRGTGVGSDGRTQGITMPNSEAQASLIRQTYARAGLDPSIAEDRCQYFEAHGTGTQVGDPREAKAIEEAFFGTSDNTEATDDKLLVGSIKTIIGHTEGAAGLAGVLKVLQAMKHGSVTPN…	gene_10076/MYTGRQPEPIAIIGTSCRFTGGATSPSKLWDLLSAPTDLSREVPKDRFNAETFYHPDGEHHGTTNSIRGYWLEQDIRAFDAGFFNITPREAEAIDPQQRLLLEVVYEAMESAGRDELCTSQYYATGNARSIIANRVSYFFNFRGPSVTIDTACSSSLVALHQAVLSLRSRESKIACVTGVNLMLTPEQFIVESSLHMLSPSGRCQMWDVNADGYARGEGMAAIFLKTLSQAQADGDRIEGIIRNTGVGSDGRTQGITMPNSEAQASLIRRTYERAGLDPRSAEDRCQYFEAHGTGTQVGDPREAKAIEEAFFGTPENTTVADGQSTDKLLVGSVKTIIGHTEGAAGLAGVLKVLEAMKHKSVPPNLHFQSLNPSVQPFYSHLQIPTTV…	gene_00246/MSEHQLPLHRRRHFPSKLWDLLSTPTDLSREVPQDRFNAEAFYHPDGEHHGTTNSIRGYWLEQDIRTFDAGFFNITPREAEAIDPQQRLLLEVVYEAMESAGYPMTRLSGEDVAVFAGVMTADYDTLSQRDELCTSQYYATGNARSIIANRVSYFFNFRGPSVTIDTACSSSLVALHQAVLSLRSQESKIACVTGVNLMLTPEQFIVESSLHMLSPSGRCQMWDVSADGYARGEGVAAVFLKTLSQAQADGDRIQGIIRNTGVGSDGRTQGITMPNSEAQASLIRRTYERAGLDPRRAEDRCQYFEAHGTGTQVGDPREAKAIEEAFFGTPEDREAKDNVSTDKLLVGSVKTIIGHTEGAAGLAGVLKVLQAMKHGSVPPNLHFQSLN…	gene_15049/MQQIKDHPYNAVATRADRHRRHQLPVHRGRHVPLETVGSPRRPHRPHAAGPRDRFNAEAFYHADGEHHGTTNSIRAYWLDQDIRKFDAGFFNITPREAEAIDPQQRLLLEVVYEAMEAAGYSMARLTGADVAVFAGVMTADYDTLSQRDEMAASQYYATGNARSIIANRISYFFNFRGPSLTIDTACSSSLVALHQAVLSLRAHESRMACVTGVNLMLTPEQFIVESNLHMLSPSGRCQMWDVDADGYARGEGVAAVFIKTLSQALADGDRIEGIIRNTGVGSDGRTQGITMPNSEAQASLIMQTYAKAGLDPKLAEDRCQYFEAHGTGTQAGDPREAKAIEEAFFDTASGVQEPVDSDTLLVGSVKTVIGHTEGAAGLAGVLKVLQA…	gene_01609/MYTPGQPEPIAIVGTSCRFTGGATSPSKLWDLLADPTDLTRQVPRDRFHAEAFYHADGEHHGTTNSIRAYWLDQDIRKFDAGFFNITPREAEAIDPQQRLLLEVVYEAMEAAGYSMARLTGADVAVFAGVMTADYDTLSQRDEMAASQYYATGNARSIIANRISYFFNFRGPSLTIDTACSSSLVALHQAVLSLRAHESRMACVTGVNLMLTPEQFIVESNLHMLSPSGRCHMWDVDADGYARGEGVAAVFIKTLSQALADGDRIEGIIRNTGVGSDGRTQGITMPNSEAQASLIMQTYAKAGLDPKLAEDRCQYFEAHGTGTQAGDPREAKAIEEAFFDTASGVQEPVDSDTLLVGSVKTVIGHTEGAAGLAGVLKVLQAMKHGSVP…	gene_08148/MYTERQPEPIAIIGTSCRFTGEATSPSKLWDLLADPADLSRPVPAERFNAEAFYHPDGEHHGTTNSVRAYWLSQDVRAFDAGFFNMTPREAEAVDPQQRLVLEVVYEAMEAAGYPMARLSGEDVAVFAGVMTADYDTLSQRDELATSQYYATGNARSIIANRVSYFFNLRGPSVTIDTACSSSLVALHQAVLSLRARESKMACVTGVNLMLTPEQFIVESSLHMLSPSGRCRMWDVGADGYARGEGVAAVFVKTLSQALADGDRIEGVIRGTGVGSDGRTQGITMPNSEAQASLIRKTYERAGLDPRSEEDRCQYFEAHGTGTQVGDPREAQAIENAFFGPPGNGVPKDNIPSEKLLVGSVKTIIGHTEGAAGLAGVLKVLQAMKHGA…	gene_12391/MYTERQPEPIAIIGTSCRFTGEATSPSKLWDLLADPADLSRPVPAERFNAEAFYHPDGEHHGTTNSVRAYWLSQDVRAFDAGFFNMTPREAEAVDPQQRLVLEVVYEAMEAAGYPMARLSGRDVAVFAGVMTADYDTLSQRDELATSQYYATGNARSIIANRVSYFFNLRGPSVTIDTACSSSLVALHQAVLSLRARESKMACVTGVNLMLTPEQFIVESSLHMLSPSGRCRMWDVGADGYARGEGVAAVFVKTLSQALADGDRIEGVIRGTGVGSDGRTQGITMPNSEAQASLIRKTYERAGLDPRSEEDRCQYFEAHGTGTQVGDPREAQAIENAFFGPPGNGVPKDNIPSEKLLVGSVKTIIGHTEGAAGLAGVLKVLQAMKHGA…	gene_06969/MYTERQPEPIAIIGTSCQFTGDATSPSKLWDLLCSDHPADLSREVPKDRFNAEAFYHPDGEHHGTTNSVRAYWLEQDIRTFDAGFFNITPREAEAVDPQQRLLLEVVYEAMEASGYPMTRLSGEDVAVFAGVMTADYDTLSQRDELGTSQYYATGNARSIIANRVSYFFNFRGPSVTIDTACSSSLVALHQAVLSLRAQESKMACVTGVNLMLTPEQFIVESSLHMLSPSGRCRMWDIGADGYARGEGVAAIFIKTLSQALADGDQIEGIIRGTGVGSDGRTQGITMPNSEAQASLIRRTYERSGLDPKNEEDRCQYFEAHGTGTQVGDPREAQAIEAAFFGPPENETTPKNDNIPERLLVGSVKTIIGHTEGAAGLAGVLKVLQAMK…	gene_14975/MYTERQPEPIAIIGTSCRFTGDATSPSKLWDLLADPVDLSRPVPAERFNAEAFYHPDGEHHGTTNSVRAYWLSQDVRAFDAGFFNMTPREAEAVDPQQRLVLEVVYEAMEAAGYPMARLSGEDVAVFAGVMTADYDTLSQRDELATSQYYATGNARSIIANRVSYFFNLRGPSVTIDTACSSSLVALHQAVLSLRSQESRMACVTGVNLMLTPEQFVVESSLHMLSPSGRCRMWDVGADGYARGEGVAAVFVKTLSQALADGDRIEGIIRGTGVGSDGRTQGITMPNSEAQASLIRKTYERAGLDPRCEEDRCQYFEAHGTGTQVGDPREAQAIEKAFFGPPGNGTPKDDIPSEKLLVGSVKTIIGHTEGAAGLAGVLKVLQAMKHGA…	gene_01078/MYTERQPEPIAIIGTSCRFTGGATSPSKLWDTLSDPADLSREVPKDRFSAAAFYHPDGEHHGTTNSVRAYWLEQDLRAFDAGFFNITPREAEAIDPQQRLLLEVVYEAMEAAGYPMSQLSGQDIAVFAGAMTADYDILSQRDELSTSQYYATGNARSIIANRVSYFFNLRGPSVTIDTACSSSLVALHQAVLSLRAGESRMACVTGVNLMLAPEQFIVESSLHMLSPSGRCRMWDVGVAAMFVKTLSQALVDGDQIEGIIRGTGVGSDGRTQGITMPNSESQASLIMKTYERAGLDSKSAEDRCQYFEAHGTGTQVGDPREAQAIEEAFFGTPENEAVANDLLPDRLLVGSVKTIIGHTEGAAGLAGVLKVLQAMKHGSVPPNLHFHS…	gene_11227/MHTEHQSELIAIIGTSCRFTGGATSPSKLWDVLSNPTDLTREVPRDRFNAEAFYHPDGEHHGTTNSIRGYWLEQDHRVFDAGFFNITPREAEAMDPQQRLLLEVVYEAMESSGYSMARLSGEDVAVFAGVMTADYDTLSQRDELCTSQYYATGNARSIISNRISYFFNFRGPSITIDTACSSSLVALHQAVLSLRSQESSMACVTGVNLMLTPEQFIVESSLHMLSPSGRCQMWDVNADGYARGEGVAAMFIKTLSQALADGDKIEGIIRGTGVGSDGRTQGITMPNPDAQASLITKTYRNAGLDPKSAEDRCQYFEAHGTGTQVGDPREAQAIDEAFFGTPEHEKVTGEVLTDKLLVGSVKTVIGHTEGAAGLAGVLKVLQAMKHRL…	gene_08409/MYTERQPEPIAIIGTSCRFTGGATSPSKLWDLLSDPTDLSREVAKGRFNAEAFYHPDGEHHGTTNSIRGYWLDQDIRAFDAGFFNITPREAEAIDPQQRLLLEVVYEAMESAGYPMNRLSGEDVAVFAGVMTADYDTLSQRDELCTSQYYATGNARSIIANRVSYFFNFRGPSVTIDTACSSSLVALHQAVLSLRSQESKIACVTGVNLMLTPEQFIVESSLHMLSPSGRCQMWDVSADGYARGEGVAAVFIKTLSQALADGDRIEGVIRNTGVGSDGRTQGITMPNSEAQASLIRRTYERAGLDPRSPEDRCQYFEAHGTGTQVGDPREAKAIEEAFFGTPETKAANDDLPSDKLLVGSIKTIIGHTEGAAGLAGVLKVLQAMKHGS…	gene_04507/MYTERQPEPIAIIGTSCRFTGDATSPSKLWDLLCSDRPADLSREVPKDRFHAEAFYHPDGEHHGTTNSVRAYWLEQDIRTFDAGFFNITPREAEAVDPQQRLLLEVVYEAIEASGYPMTRLSGEDVAVFAGVMTADYDTLSQRDELGTSQYYATGNARSIIANRVSYFFNFRGPSVTIDTACSSSLVALHQAVLSLRAQESKMACVTGVNLMLTPEQFIVESSLHMLSPSGRCRMWDVGADGYARGEGVAAIFIKTLSQALADGDQIEGIIRGTGVGSDGRTQGITMPNSEAQASLIRRTYERSGLDPKNEEDRCQYFEAHGTGTQVGDPREAQAIEAAFFGPPDNETTPNNDNIPEKLLVGSVKTIIGHTEGAAGLAGVLKVLQAMK…	gene_05948/MYTERQPEPIAIIGTSCRFTGDATSPSKLWDLLCSDRPADLSREVPKDRFHAEAFYHPDGEHHGTTNSVRAYWLEQDIRTFDAGFFNITPREAEAVDPQQRLLLEVVYEAIEASGYPMTRLSGEDVAVFAGVMTADYDTLSQRDELGTSQYYATGNARSIIANRVSYFFNFRGPSVTIDTACSSSLVALHQAVLSLRAQESKMACVTGVNLMLTPEQFIVESSLHMLSPSGRCRMWDVGADGYARGEGVAAIFIKTLSQALEDGDQIEGIIRSTGVGSDGRTQGITMPNSEAQASLIRRTYERSGLDPKNEEDRCQYFEAHGTGTQVGDPREAQAIEAAFFGPPDNETTPKNDNIPEKLLVGSVKTIIGHTEGAAGLAGVLKVLQAMK…	gene_09462/MYTQRQPEPIAIIGTSCRFTGGATSPSKLWDLLSDPTDLTREVPKDRFNAEAFYHPDGEHHGTTSSIRGYWLEQDIRKFDVGFFNITPREAEAIDPQQRLLLEVVYEAMEASGYSMAHLSGEDVAVFAGVMTADYDTLSQRDELSTSQYYATGNARSIIANRVSYFFNFRGPSLTIDTACSSSLVALHQAVLSLRAQESKMACVTGVNLMLTPEQFIVESSLHMLSPSGRCQMWDVNADGYARGEGVAAIFIKTLSQALADGDKIEGIIRGTGVGSDGRTQGITMPNSEAQASLIRQTYARAGLDPSIAEDRCQYFEAHGTGTQVGDPRESKAIEEAFFGTSDNTEATDDKLLVGSIKTIIGHTEGAAGLAGVLKVLQAMKHGLVPPN…
PKS3	gene_07201/IFCSSQPITPQAMDTQSAETPRLAPVAVVGMACRLSGDVSSPDDLWTMLSRSRDGWCEVPADRFSSKAFYHRNPQRTGTFNIKGGYFMKQDISKFDAPFFNITKQEATAMDPQQRQLLEVTYEALESAGIPKDTISGRSMGVYVAGRPSDYRQGTLDDTCQLPLFDATGNQVSVQAGRISYYFNLQGPSFTVDTACSSGLYALHSAVQSIRSGESESAIVAGCCLRLQPDDMISMSMMGIYNEKGRTFAFDSRADSGYAPGEGFGCLILKPLDQALRDNDKIRSIIINTGINQDGRTVGMTTPSGEAQQRLIEDVYAKAGIDTQDTGFIEAHGTGTKVGDPIEAGAISRVFSAGRSKKNPLYIGSVKSNIGHLEHASGIISIIKASMM…	gene_10950/MAYTLGQRRTHLPYRLALPATTLEDLEKALNSYVIPNRPASREPKLAFVYTGQGAQWATMGAALLESHPVFSDTIQAADQTLQKIGAGFSLVEELQKDGKQSRISEPDISQSACTAVQLGLTELLKSWKITPSSVIGHSSGEICAAYATGAITLEEAMTAAYYRGHYATALKATHPHLNGGMLAVGKSSTEVKELIAAGGYQDIGVACENSPNSVTISGQQDSLDQLSAKLESQGVFNRKLRTDVAYHSSHMEVIANDYMDAIKHMKPGDRSEVQMYSSLLGSRLDSTLSLGAEYWINNLTKPVLFSTGMQSLYTEAQPDVIVEIGPHSALEGPIKQILKSCSKEDAANTKYFPSLVRNTHATEAVMKLGGNLFAQGQTIDFNAINES…	gene_14985/MDIQNAESPRLAPVAVVGMACRLSGDVSSPDDLWTMLSRSRDGWCEVPADRFSSKAFYHRNPQRTGTFNIKGGYFMKQDVSKFDAPFFNITKQEATAMDPQQRQLLEVTYEALESAGIPKDTISGRSMGVYVAGRPSDYRQGTLDDTCQLPLFDATGNQVSVQAGRISYYFNLQGPSFTVDTACSSGLYALHSAVQSIRSGESESAIVAGCCLRLQPDDMISMSMMGIYNEKGRTFAFDSRADSGYAPGEGFGCLILKPLDQALRDNDKIRSIIVNTGINQDGRTVGMTTPSGEAQQRLIEEVYAKAGIDTQDTGFIEAHGTGTKVGDPIEAGAISRVFSAGRSKKNPLYIGSVKSNIGHLEHASGIISIIKASMMLERGLLLPNVNF…	gene_00371/MDIQNAESPRLAPVAVVGMACRLSGDVSSPDDLWTMLSRSRDGWCEVPADRFSSKAFYHRNPQRTGTFNIKGGYFMKQDVSKFDAPFFNITKQEATAMDPQQRQLLEITYEALESAGIPKDTISGRSMGVYVAGRPSDYRQGTLDDTCQLPLFDATGNQVSVQAGRISYYFNLQGPSFTVDTACSSGLYALHSAVQSIRSGESESAIVAGCCLRLQPDDMISMSMMGIYNEKGRTFAFDSRADSGYAPGEGFGCLILKPLDQALRDNDKIRSIIVNTGINQDGRTVGMTTPSGKAQQRLIEEVYAKAGIDTQDTGFIEAHGTGTKVGDPIEAGAISRVFSAGRSKKNPLYIGSVKSNIGHLEHASGIISIIKASMMLERGLLLPNVNF…	gene_13127/MDIQNAESPSLAPVAVVGMACRLSGDVSSPDDLWTMLSRSRDGWCEVPADRFSSKAFYHRNPQRTGTFNIKGGYFMKQDVSKFDAPFFNITKQEATAMDPQQRQLLEVTYEALESAGIPKDTISGRSMGVYVAGRPSDYRQGTLDDTCQLPLFDATGNQVSVQAGRISYYFNLQGPSFTVDTACSSGLYALHSAVQSIRSGESESAIVAGCCLRLQPDDMISMSMMGIYNEKGRTFAFDSRADSGYAPGEGFGCLILKPLDQALRDNDKIRSIIVNTGINQDGRTVGMTTPSGEAQQRLIEEVYAKAGIDTQDTGFIEAHGTGTKVGDPIEAGAISRVFSAGRSKKNPLYIGSVKSNIGHLEHASGIISIIKASMMLERGLLLPNVNF…	gene_08356/MDIQNAESPRLAPVAVVGMACRLSGDVSSPDDLWTMLSRSRDGWCEVPADRFSRKAFYHRNPQRTGTFNIKGGYFMKQDVSKFDAPFFNITKQEATAMDPQQRQLLEVTYEALESAGIPKDTISGRSMGVYVAGRPSDYRQGTLDDTCQLPLFDATGNQVSVQAGRISYYFNLQGPSFTVDTACSSGLYALHSAVQSIRSGESESAIVAGCCLRLQPDDMISMSMMGIYNEKGRTFAFDSRADSGYAPGEGFGCLILKPLDQALRDNDKIRSIIVNTGINQDGRTVGMTTPSGEAQQRLIEEVYAKAGIDTQDTGFIEAHGTGTKVGDPIEAGAISRVFSAGRSKKNPLYIGSVKSNIGHLEHASGIISIIKASMMLERGLLLPNVNF…	gene_08887/MDIQNAESPRLAPVAVVGMACRLSGDVSSPDDLWTMLSRSRDGWCEVPADRFSSKAFYHRNPQRTGTFNIKGGYFMKQDVSKFDAPFFNITKQEATAMDPQQRQLLEVTYEALESAGIPKDTISGRSMGVYVAGRPSDYRQGTLDDTCQLPLFDATGNQVSVQAGRISYYFNLQGPSFTVDTACSSGLYALHSAVQSIRSGESESAIVAGCCLRLQPDDMISMSMMGIYNEKGRTFAFDSRADSGYAPGEGFGCLILKPLDQALRDNDKIRSIIVNTGINQDGRTVGMTTPSGEAQQRLIEEVYAKAGIDTQDTGFIEAHGTGTKVGDPIEAGAISRVFSAGRSKKNPLYIGSVKSNIGHLEHASGIISIIKASMMLERGLLLPNVNF…	gene_12246/MDTMTAETPRLAPVAVVGMACRLSGDVSSPDDLWTMLSRSRDGWCEVPADRFSSKAFYHRNPQRTGTFNIKGGYFMKQDVSKFDAPFFNITKQEATAMDPQQRQLLETTYEALENAGIPKDTISGRNMGVYVAGRPSDYRQGTLDDTCQLPLFDATGNQVSVQAGRISYYFNLQGPSFTVDTACSSGLYALHTAVQSIRSGESESAIVAGCCLRLQPDDMISMSMMGIYNEKGRTFAFDSRADSGYAPGEGFGCLILKPLDQALRDNDKIRSIIVNTGINQDGRTVGMTTPSGEAQQRLIQEVYDKAGIDIQDTGFIEAHGTGTKVGDPIEAGAISRVFSAGRSKRNPLYIGSVKSNIGHLEHASGIISIIKASMMLERGLLLPNVNF…	gene_05944/MDTMTAETPRLAPVAVVGMACRLSGDVSSPDDLWTMLSRSRDGWCEVPADRFTSKAFYHRNPQRTGTFNIKGGYFMKQDVSKFDAPFFNITKQEATAMDPQQRQLLEVTYEALESAGIPKDTISGRNMGVYVAGRPSDYRQGTLDDTCQLPLFDATGNQVSVQAGRISYYFNLQGPSFTVDTACSSGLYALHTAVQSIRSGESESAIVAGCCLRLQPDDMISMSMMGIYNEKGRTFAFDSRADSGYAPGEGFGCLILKPLDQALRDNDKIRSIIVNTGINQDGRTVGMTTPSGEAQQRLIQDVYDKAGIDTQDTGFIEAHGTGTKVGDPIEAGAISRVFSAGRSKRNPLYIGSVKSNIGHLEHASGIISIIKASMMLERGLLLPNVNF…	gene_14074/MDANSAETPRLAPVAVVGMACRLSGDVSSPDDLWTMLSRSRDGWCEVPADRFSSKAFYHRNPQRTGTFNIKGGYFMKQDVSRFDAPFFNITKQEATAMDPQQRQLLEVTYEALESAGIPKDTISGRSMGVYVAGRPSDYRQGTLDDTCQLPLFDATGNQVSVQAGRISYYFNLQGPSFTVDTACSSGLYALHSAVQSIRSGESESAIVAGCCLRLQPDDMISMSMMGIYNEKGRTFAFDSRADSGYAPEQALRDNDKIRSVIVNTGINQDGRTVGMTTPSGEAQQRLIEEVYAKAGIDTQDTGFIEAHGTGTKVGDPIEAGAISRVFSAGRSKRNPLYIGSVKSNIGHLEHASGIISIIKASMMLERGLLLPNVNFEDANPAIPLDKW…	gene_04262/MDANSAETPRLAPVAVVGMACRLSGDVSSPDDLWTMLSRSRDGWCEVPADRFSSKAFYHRNPQRTGTFNIKGGYFMKQDVSRFDAPFFNITKQEATAMDPQQRQLLEVTYEALESAGIPKDTISGRSMGVYVAGRPSDYRQGTLDDTCQLPLFDATGNQVSVQAGRISYYFNLQGPSFTVDTACSSGLYALHSAVQSIRSGESESAIVAGCCLRLQPDDMISMSMMGIYNEKGRTFAFDSRADSGYAPGEGFGCIILKPLEQALRDNDKIRSVIVNTGINQDGRTVGMTTPSGEAQQRLIEEVYAKAGIDTQDTGFIEAHGTGTKVGDPIEAGAISRVFSAGRSKRNPLYIGSVKSNIGHLEHASGIISIIKASMMLERGLLLPNVNF…	gene_02546/METNNTTETPHLAPVAVVGMACRLSGDVSSPDDLWTMLSRSRDGWCKVPEDRFSSKAFYHRNPQRTGTFNIKGGYFMKHDVSKFDAPFFNITKQEATAMDPQQRFLLEVTYEALESAGIPKDSISGRKMGVYVAGRPSDYRQGTLDDTCQLPLFDATGNQVSVQAGRISYYFNLQGPSFTVDTACSSGLYALHSAVQSIRSGESESAIVAGCCLRLQPDDMISMSMMGIYNEKGRTFAFDSRADSGYAPGEGFGCLILKPLDQALRDNDKIRSIIVNTGINQDGRTVGMTTPSGEAQQRLIEEVYAKAGIDTQDTGFIEAHGTGTKVGDPIEAGAISRVFSAGRSKRNPLYIGSVKSNIGHLEHASGIISIIKASMMLERGLLLPNVN…	gene_07351/METNNTTETPHLAPVAVVGMACRLSGDVSSPDDLWTMLSRSRDGWCKVPEDRFSSKAFYHRNPQRTGTFNIKGGYFMKHDVSKFDAPFFNITKQEATAMDPQQRFLLEVTYEALESAGIPKDSISGRKMGVYVAGRPSDYRQGTLDDTCQLPLFDATGNQVSVQAGRISYYFNLQGPSFTVDTACSSGLYALHSAVQSIRSGESESAIVAGCCLRLQPDDMISMSMMGIYNEKGRTFAFDSRADSGYAPGEGFGCLILKPLDQALRDNDKIRSIIVNTGINQDGRTVGMTTPSGEAQQRLIEEVYAKAGIDTQDTGFIEAHGTGTKVGDPIEAGAISRVFSAGRSKRNPLYIGSVKSNIGHLEHASGIISIIKASMMLERGLLLPNVN…	gene_07331/MACRLSGDVSSPDDLWTMLSRSRDGWCKVPEDRFSSKAFYHKNPQRTGTFNIKGGYFMKQDVSKFDAPFFNITKQEATAMDPQQRFLLEVTYEALESAGIPKDAISGRKMGVYVAGRPSDYRQGTLDDTCQLPLFDATGNQVSVQAGRISYYFNLQGPSFTVDTACSSGLYALHSAVQSIRSGESESAIVAGCCLRLQPDDMISMSMMGIYNEKGRTFAFDSRADSGYAPGEGFGCLILKPLDQALRDNDKIRSIIVNTGINQDGRTVGMTTPSGKAQQRLIEEVYAKAGIDTQDTGFVEAHGTGTKVGDPIEAGAISRVFSAGRSKRNPLYIGSVKSNIGHLEHASGIISIIKASMMLERGLLLPNVNYEDTNPAIPLDKWNMKVPG…	gene_09083/METNNHTETPLLAPVAVVGMACRLSGDVSSPDDLWTMLSRSRDGWCKVPEDRFSSKAFYHRNPQRTGTFNIKGGYFMKHDVSKFDAPFFNITKQEATAMDPQQRFLLEVTYEALESAGIPKDTISGRKMGVYVAGRPSDYRQGTLDDTCQLPLFDATGNQVSVQAGRISYYFNLQGPSFTVDTACSSGLYALHSAVQSIRSGESESAIVAGCCLRLQPDDMISMSMMGIYNEKGRTFAFDSRADSGYAPGEGFGCLILKPLDQALRDNDKIRSIIVNTGINQDGRTVGMTTPSGEAQQRLIEEVYAKAGIDTQDTGFIEAHGTGTKVGDPIEAGAISRVFSAGRSKRNPLYIGSVKSNIGHLEHASGIISIIKASMMLERGLLLPNVN…	gene_06020/MDTQSAEAPRLAPVAVVGMACRLSGDVSSPDDLWTMLSRSRDGWWNKKYISINNFGFGGANAHVVLERPPSAESTGSPSKLPRGGPKLFAITANSEESLKKQVKKLGIYIEKHPEIFQSSLFRDMAYTLGQRRTHLQYRIALPATTLENLEKALNSSSIPKRPASREPKLAFVYTGQGAQWATMGSTLLESHPVFADTIHAADKVLKKIGAGFSLVEELLKDGKQSRISEPDISQSACTAVQLGLTELLKSWKITPSCVIGHSSGEISAAYATGAITIEEAMTSAYYRGHYATALKATHQHLNGGMLAVGKSSAEVKELIAAHRYQDIGVACENSPNSVTVSGQQDSLDQLSAKLESQGIFNRKLRTDVAYHSSHMEVIANDYMNAIK…	gene_03302/MDTKTTETPLLAPVAVVGMACRLSGNVSSPEDLWTMLSRSKDGWCKVPEDRFSSKAFYHRNPQRTGTFNIKGGYFMKQDISKFDAPFFSITKQEATAMDPQQRQLLEVTYEALESAGIPKDSISGRNMGVYIAGRPSDYRQGTLDDTCHIPLFDSTGNQCSVQAGRISYYFNLQGPSFTIDTACSSGLYALHSAVQSIRSGESESAIVAGCCLRLQPDDLISMSMMGIYNEKGRTFAFDHRADSGYAPGEGFGCLILKPLDQALRDNDKIRSIIVNTGTNQDGRTVGMTTPSGEAQQRLIEEVYAKAGIDTQDAGFIEAHGTGTKVGDPIEAAAISRVFSADRSKRNPLYIGSVKSNVGHLENVSGIISIIKASMMLERGLLLPNVNF…	gene_05005/MDTKSAETPRLAPVAVVGMACRLSGDVSSPDDLWTMLSRSRDGWCEVPADRFSKKAFYHRNPQRTGTFNIKGGYFMKQDVSKFDAPFFNITKQEATAMDPQQRQLLEVTYEALESAGIPKDTLSGRNMGVYVAGRPSDYRQGTLDDTCQLPLFDATGNQVSVQAGRISYYFNLQGPSFTVDTACSSGLYALHTAVQSIRSGESESAIVAGCCLRLQPDDMISMSMMGIYNEKGRTFAFDSRADSGYAPGEGFGCLILKHLDQALRDNDKIRSIIVNTGINQDGRTVGMTTPSGEAQQRLIQEVYDKAGIDTQDAGFIEAHGTGTKVGDPIEAGAISRVFSAGRSKRNPLYIGSVKSNIGHLEHASGIISIIKASMMLERGLLLPNVNF…	gene_12854/MTSETPRLAPVAVVGMACRLSGDVSSPEDLWTMLSRSRDGWCKVPEDRFSSKAFYHKNPQRTGTFNIKGGYFMKQDVSEFDAPFFNITKQEATAMDPQQRFLLEVAYEALESAGIPKDTISGRKMGVYVAGRPSDYRQGTLDDTCQLPLFDATGNQVSVQAGRISYYFNLQGPSFTVDTACSSGLYALHSAVQSIRSGESESAIVAGCCLRLQPDDMISMSMMGIYNEKGRTFAFDSRADSGYAPGEGFGCLILKPLDQALRDNDKIRSIIVNTGINQDGRTVGMTTPSGEAQQRLIEEVYAKAGIDTQDTGFVEAHGTGTKGPYLESSARAARRGNPLYMGSVKSNVGHLEHASGIISIIKASMMLERGLLLPNVNYQDTNPAIPLD…	gene_00926/MACRLSGDVSSPEDLWTMLSRSRDGWCKVPEDRFSSKAFYHKNPQRTGTFNIKGGYFMKQDVSEFDAPFFNITKQEATAMDPQQRFLLEVAYEALESAGIPKDTISGRKMGVYVAGRPSDYRQGTLDDTCQLPLFDATGNQVSVQAGRISYYFNLQGPSFTVDTACSSGLYALHSAVQSIRSGESESAIVAGCCLRLQPDDMISMSMMGIYNEKGRTFAFDSRADSGYAPGEGFGCLILKPLDQALRDNDKIRSIIVNTGINQDGRTVGMTTPSGEAQQRLIEEVYAKAGIDTQDTGFVEAHGTGTKVGDPIEAGAISRVFSAGRSKRNPLYMGSVKSNVGHLEHASGIISIIKASMMLERGLLLPNVNYQDTNPAIPLDKWHMKVPG…	gene_01211/MDIQNAESPRLAPVAVVGMACRLSGDVSSPDDLWTMLSRSRDGWCEVPADRFSSKAFYHRNPQRTGTFNIKGGYFMKQDVSKFDAPFFNITKQEATAMDPQQRQLLEVTYEALESAGIPKDTISGRSMGVYVAGRPSDYRQGTLDDTCQLPLFDATGNQVSVQAGRISYYFNLQGPSFTVDTACSSGLYALHSAVQSIRSGESESAIVAGCCLRLQPDDMISMSMMGIYNEKGRTFAFDSRADSGYAPGEGFGCLILKPLDQALRDNDKIRSIIVNTGINQDGRTVGMTTPSGEAQQRLIEEVYAKAGIDTQDTGFIEAHGTGTKVGDPIEAGAISRVFSAGRSKKNPLYIGSVKSNIGHLEHASGIISIIKASMMLERGLLLPNVNF…
PKS4	gene_02010/MSSQLDADLTTASPDDIAIIGLGCRFPGGATTPSKLWDLFVNGQSAWSPIPASKWNASAHYHPSSEHGGSNWVKGGHFLEDGPENGKQFDAPFFNITRTEAMSLDLQQRIVLENVYEALENAGLRLDEVKGSRTSVYAGAFTDDSRAIMNEDPDVLLKFKPTGTSTSIISNRISYFYDLKGTSLTLDTACSSSLVAFALGCQDLRNGGSEMSIVTGVNIIESPETMYRMSNLGFLSPDGRCFSFDSRANGYSRGEGVGTVILKPMAAALRDGNTIRAVVRGTGIGQDGQGTGAMTLPNKVAQEALMREVYAKYKLNLDETGLVEAHATGTAAGDPLEAGAIASTFRRVNAPGATAKPPLYVGAGKTNHGHLEGASGVAAIIKTVLSLE…	gene_09258/MSSLSDAELATASPDDIAIIGLGCRFPGGATTPSKLWDLFVNGRSAWSPIPASKWNASAHYHPSIFLFSANDEAGIKRVLSTYANHLEKQLQDDPSIGDNDAYLSNLAYTLSQHRSRLSWRIAIAADSHASLLTSLKDASISSRASRVSTAATPALAFIFTGQGAQWFAMGRELLQYPVFRASITQADTYLSSQGCDFSVLEELAHREADASRIDEPLFSQTLCSVLQIALVDLLETWNVAPKRVVGHSSGEIAAAYTAGALSRESAWRVAYSRGVISSKPSPVKGAMLAVGYSAVEIEPLIKEVNAKLGEAGDLGIACYNSPKSLTISGDEDRIDALQEVVDAKKVFARKLRVGKAYHSNHMRPFMDEYTSLMGNLERGSSKDVQVF…	gene_12487/MSLSDADLAAASPDDIAIIGLGCRFPGGATTPSKLWDIFVNGRSAWSPIPASKWNASAHYHPSNGPENGKQFDAPFFNITRTEAMSLDLQQRIVLENVYEALENAGLRLDEVKGSRTSVYAGAFTDDSRAIMNEDPDVLLKFKPTGTSSSIISNRISYFYDLKGTSLTLDTACSSSLVAFALGCQDLRNGGCEMSIITGVNIIESPETMYRMSNLGFLSPDGRCFSFDSRANGYSRGEGVGTVILKPVAAALRDGNTIRAIVRGTGIGQDGQGTGAMTLPNKVAQEALMREVYANYKLNLDETGLVEAHATGTAAGDPLEAGAIASTFRRVKTPGATAKPPLYVGAGKTNHGHLEGASGVAAIIKTVLSLEQGIIPPNVNFEKCNPRI…	gene_13304/MSLADADLAAASPDDIAIIGLGCRFPGGATTPSKLWDIFVNGRSAWSPIPASKWNASAHYHPSNGPENGKQFDAPFFNITRTEAMSLDLQQRIVLENVYEALENAGLRLDEVKGSRTSVYAGAFTDDSRAIMNEDPDVLLKFKPTGTSSSIISNRISYFYDLKGTSLTLDTACSSSLVAFALGCQDLRNGGCEMSIITGVNIIESPETMYRMSNLGFLSPDGRCFSFDSRANGYSRGEGVGTVILKPVAAALRDGNTIRAIVRGTGIGQDGQGTGAMTLPNKVAQEALMREVYANYKLNLDETGLVEAHATGTAAGDPLEAGAIASTFRRVKTPGATAKPPLYVGAGKTNHGHLEGASGVAAIIKTVLSLEQGIIPPNVNFEKCNPRI…	gene_15641/MSLSDADLAAVSPDDIAIIGLGCRFPGGATTPSKLWDLFVNGRSAWSPIPSSKWNASAHYHPSSEHGGSNWVKGGHFLEDGPENGKQFDAPFFNITRTEVMSLDLQQRIVLENVYEALENAGLRLDEVKGSRTSVYAGAFTDDSRAIMNEDPDVLLKFKPTGTSSSIISNRISYFYDLKGTSLTLDTACSSSLVAFALGCQDLRNGGCEMSIITGVNIIESPETMYRMSNLGFLSPDGRCFSFDSRANGYSRGEGVGTVILKPVAAALRDGNTIRAIVRGTGIGQDGQGTGAMTLPNKVAQEALMREVYANYKLNLDETGLVEAHATGTAAGDPLEAGAIASTFRRVKTPGATAKPPLYVGAGKTNHGHLEGASGVAAIIKTVLSLEH…	gene_02882/MSLADADLAAVSPDDIAIIGLGCRFPGGATTPSKLWDIFVNGRSAWSPIPASKWNASAHYHPSSEHGGSNWVKGGHFLEDGPENGKQFDAPFFNITRTEAMSLDLQQRIVLENVYEALENAGLRLDEVKGSRTSVYAGAFTDDSRAIMNEDPDVLLKFKPTGTSSSIISNRISYFYDLKGTSLTLDTACSSSLVAFALGCQDLRNGGCEMSIITGVNIIESPETMYRMSNLGFLSPDGRCFSFDSRANGYSRGEGVGTVILKPVAAALRDGNTIRAIVRGTGIGQDGQGTGAMTLPNKVAQEALMREVYANYKLNLDETGLVEAHATGTAAGDPLEAGAIASTFRRVKTPGATAKLPLYVGAGKTNHGHLEGASGVAAIIKTVLSLEQ…	gene_14633/MSLSDADLAAASPDDIAIIGLGCRFPGGATTPSKLWDIFVNGRSAWSPIPASKWNASAHYHPSSEHGGSNWVKGGHFLEDGPENGKQFDAPFFNITRTEAMSLDLQQRIVLENVYEALENAGLRLDEVKGSRTSVYAGAFTDDSRAIMNEDPDVLLKFKPTGTSSSIISNRISYFYDLKGTSLTLDTACSSSLVAFALGCQDLRNGGCEMSIITGVNIIESPETMYRMSNLGFLSPDGRCFSFDSRANGYSRGEGVGTVILKPVAAALRDGNTIRAIVRGTGIGQDGQGTGAMTLPNKVAQEALMREVYANYKLNLDETGLVEAHATGTAAGDPLEAGAIASTFRRVKTPGATAKPPLYVGAGKTNHGHLEGASGVAAIIKTVLSLEQ…	gene_09716/MSPSEADLAAASPDDIAIIGLGCRFPGGATTPSKLWDLFVNGRSAWSAIPASKWNASAHYHPSSERGGSNWVKGGHFLEDGPENGKQFDAPFFNITRTEAMSLDLQQRIVLENVYEALENAGLRLDEVKGSRTSVYAGAFTDDSRAIMNEDPDVLLKFKPTGTSTSIISNRISYFYDLKGTSLTLDTACSSSLVAFALGCQDLRNGGSEMSIVTGVNIIESPETMYRMSNLGFLSPDGRCFSFDSRANGYSRGEGVGTVILKPFSAALRDGNTIRAIVRGSGIGQDGQGTGAMTLPNKTAQEALMREVYANYKLSLDETGLIEAHATGTAAGDPLEAGAIASTFRRTNAPGKTPLYVGAGKTNHGHLEGASGVAAIIKTVLTLEQGVI…	gene_00614/MSPSEADLAAASPDDIAIIGLGCRFPGGATTPSKLWDLFVNGRSAWSPIPASKWNASAHYHPSSERGGSNWVKGGHFLEDGPENGKQFDAPFFNITRTEAMSLDLQQRIVLENVYEALENAGLRLDEVKGSRTSVYAGAFTDDSRAIMNEDPDVLLKFKPTGTSTSIISNRISYFYDLKGTSLTLDTACSSSLVAFALGCQDLRNGGSEMSIITGVNIIESPETMYRMSNLGFLSPDGRCFSFDSRANGYSRGEGVGTVILKPVSAALRDGNTIRTIVRGSGIGQDGQGTGAMTLPNKTAQEALMREVYANYNLSLDETGLVEAHATGTAAGDPLEAGAIASTFRRTNAPGKTPLYVGAGKTNHGHLEGASGVAAIIKTVLTLEQGVI…	gene_09253/MSTVSDAELATASPDDIAIIGLGCRFPGGATTPSKLWDLFVQGRSAWSPIPASKWNASAHYHPSSERGGSNWVKGGHFLEDGPENGKQFDAPFFNITRTEAMSLDLQQRIVRELMPPFQFLHEVAHHLRQMLSLKIVENVYEALENAGLRLDEVKGSRTSVYAGAFTDDSRAIMNEDPDVLLKFKPTGTSTSIISNRISYFYDLKGTSLTLDTACSSSLVAFALGCQDLRNGGSEMSIVTGVNIIESPETMYRMSNLGFLSPDGRCFSFDSRANGYSRGEGVGTVILKPVAAALRDGNTIRAIVRGTGIGQDGQGTGAMTLPNKVAQEALMREVYANYKLNLDETGLVEAHATGTAAGDPLEAGAIASTFRRVNAPGSAAKPPLYVGA…	gene_02064/MSTLSDAELAAASPDDIAIIGLGCRFPGGATTPSKLWDLFVQGRSAWSPIPASKWNASAHYHPSSERGGSNWVKGGHFLEDGPENGKQFDAPFFNITRTEAMSLDLQQRIVLENVYEALENAGLRLDEVKGSRTSVYAGAFTDDSRAIMNEDPDVLLKFKPTGTSTSIISNRISYFYDLKGTSLTLDTACSSSLVAFALGCQDLRNGGCEMSIVTGVNIIESPETMYRMSNLGFLSPDGRCFSFDSRANGYSRGEGVGTVILKPVAAALRDGNTIRAIVRGTGIGQDGQGTGAMTLPNKVAQEALMREVYANYKLNLDETGLVEAHATGTAAGDPLEAGAIASTFRRVNAPGSAAKPPLYVGAGKTNHGHLEGASGVAAIIKTVLSLE…	gene_08514/MSLSDAELAAASPDDIAIIGLGCRFPGGATTPSKLWDLFVNGRSAWSPIPASKYNASAHYHPSSERGGSTWVKGGHFLEDGPENGKQFDAPFFNITRTEAMSLDLQQRIVLENVYEALENAGLRLDEIKGSRTSVYAGAFTDDSRAIMNEDPDVLLKFKPTGTSTSIISNRISYFYDLRSTSLTLDTACSSSLVAFALGCQDLRNGGSDMSIVTGVNIIESPETMYRMSNLGFLSPDGRCFSFDSRANGYSRGEGVGTVILKPVAAALRDGNTIRAVVRGTGIGQDGQGTGAMTLPNKVAQEALMREVYANYKLNLDETGLVEAHATGTAAGDPLEAGAIASTFRRVNTPGSSGKPPLYVGAGKTNHGHLEGASGVAAIIKTVLTLEQ…	gene_01482/MSLSDADLAAASPDDIAIIGLGCRFPGGATTPSKLWDLFVNGRSAWSPIPASKYNASAHYHPSSEHGGSTWVKGGHFLEDGPENGKQFDAPFFNITRTEAMSLDLQQRIVLENVYGALENAGLRLDEVKGSRTSVYAGAFTDDSRAIMNEDPDVLLKFKPTGTSTSIISNRISYFYDLRSTSLTLDTACSSSLVAFALGCQDLRNGGSDMSIVTGVNIIESPETMYRMSNLGFLSPDGRCFSFDSRANGYSRGEGVGTVILKPVSAALRDGNTIRAIVRGTGIGQDGQGTGAMTLPNKAAQEALMREVYANYKLSLDETGLVEAHATGTAAGDPLEAGAIASTFRRVNTSGSSGKPPLYVGAGKTNHGHLEGASGVAAIIKTVLTLEQ…	gene_06573/MSLSDAELAAASPDDIAIIGLGCRFPGGATTPSKLWDLFVNGRSAWSPIPASKYNASAHYHPSSERGGSNWVKGGHFLEDGPENGKQFDAPFFNITRTEAMSLDLQQRIVRKLRPLFVHVIGWGLTGRTVENVYEALENAGLRLDEVKGSRTSVYAGAFTDDSRAIMNEDPDVLLKFKPTGTSTSIISNRISYFYDLRGTSLTLDTACSSSLVAFALGCQDLRNGGSEMSIITGVNIIESPETMYRMSNLGFLSPDGRCFSFDSRANGYSRGEGVGTVILKPVAAALRDGNTIRAIVRGTGIGQDGQGTGAMTLPNKTAQEFLMREVYANYKLNLDETGLVEAHATGTAAGDPLEAGAIASTFRRVNTPGSPGKPPLYVGAGKTNHGH…	gene_03933/MSLSDADLAAASPDDIAIIGLGCRFPGGATTPSKLWDLFVNGRSAWSPIPASKYNASAHYHPSSERGGSTWVKGGHFLEDGPENGKQFDAPFFNITRTEAMSLDLQQRIVLENVYEALENAGLRLDEVKGSRTSVYAGAFTDDSRAIMNEDPDVLLKFKPTGTSTSIISNRISYFYDLRGTSLTLDTACSSSLVAFALGCQDLRSGGSDMSIVTGVNIIESPETMYRMSNLGFLSPDGRCFSFDSRANGYSRGEGVGTVILKPVAAALRDGNTIRAIVRGTGIGQDGQGTGAMTLPNKAAQEALMREVYANYKLNLDETGLVEAHATGTAAGDPLEASAIASTFRRVNIPGSSGKPPLYVGAGKTNHGHLEGASGVAAIIKTVLTLEQ…	gene_01391/MSLADIDLATASPDDIAIIGLGCRFPGGAITPSKLWDLFVNGRSAWSPIPASKWNASAHYHPSSERGGSNWVKGGHFLEDGPENGKQFDAPFFNITRTEAMSLDLQQRIRLTISWEQKASWSLRACNSPKSLTISGDENKIDTLKEVVDAQKVFARKLRVGKAYHSNHMRPFMDEYTSLMGTLESGSSSESVQVFSSVTGQSVDAAEMSKPEYWTQNLVSPVKFQQAIYQLCTSNATKRQLKFGGGAELPVTHLVELGPHGALQGAVRDTINTDPNLKALKYLSVLTRSKHACLTALEAISSLVSHGYPVQLLSVNMQDSKDELSQSPRLLVDLPPYPFNHSPSQEYWSESRRSKSWRFRKHPRHDLLGTTVPDWNREEPKWRNYLRV…	gene_10920/MSPLSDAELAAASPYDVAIIGLACRFPGGATTPSKLWDLFANGRSAWSPVPASKWNASAHYHPSSERGGSTWVKGGHFLEDGPENGKQFDAPFFNITRTEAMSMDLQQRIVCESCSCRVRKYVQRLTQEPRTVENVYEALESAGLRLDQVKGSKTSVYAGAFTDDSRAIMNEDPDVLLKFKPTGTSNSIISNRISYFYDLKGTSLTLDTACSSSLVAFALGCQDLQNGGSEMSIITGVNIIESPETMYRMSNLGFLSPDGRCFSFDSRANGYSRGEGVGTVILKPVAAALRDGDTIRAIVRGSGIGQDGQGTGAMTLPNKAAQEELIRDVYSKYKLSLDETGLVEAHATGTAAGDPLEAGAIASTFRRVSVPGTSDKKPALYVGAGKT…	gene_08000/MSPSEADLAAASPDDIAIIGLGCRFPGGATTPSKLWDLFVNGRERGGSNWVKGGHFLEDGPENGKQFDAPFFNITRTEAMALDLQQRIVLENVYETLENAGLRLDDVKGSRTSVYAGAFTDDSRAIMNEDPDVLLKFKPTGTSTSIISNRISYFYDLKGTSLTLDTACSSSLVAFALGCQDLRNGGSEMSIITGVNIIESPETMYRMSNLGFLSPDGRCFSFDSRANGYSRGEGVGTVILKPVSAALRDGNTIRAIVRGTGIGQDGQGTGAMTLPNKTAQEALMREVYANYKLNVDETGLVEAHATGTAAGDPLEAGAIASTFRRTNAPGKPPLYVGAGKTNHGHLEGASGVAAIIKTVLTLEQGIIPPNINFEKCNPRIPVDKWGIR…	gene_04217/MPGVSPSPPTPTPPFSLHSRSPPPHQKPRASAPPIPPALAFVFTGQGAQWFAMGKELLQYPIFRDSVTQADAYLSSLGCTFSVLEELQDRDAEPSRIDEPLFSQTLCSVLQIALVNLLQTWNVAPKRVIGHSSGEIAAAYAAGALDRESAWRVAYSRGVISSKPSPTQGAMLAVGCSAADIEPLIKEVNTKLGAEGELVIACYNSPKSLTISGDDIKIDALKEVVDAQKVFARKLRVGKAYHSSHMRPFMGEYTTLMGTLERGSTSGDVQVFSSVTGQSIDAAEMTKPEYWTQNLVSPVKFQQAIYQLCTSNTAKRQLKFGGGAELPVTHLVEVGPHGALQGAVRDTIQTDPNLKALKYLSVLTRNKHACLTTLEAMSSLVSQGYPVQ…	gene_05661/MSLSDAELAAASPDDIAIIGLGCRFPGGATTSSKLWDLFVNGRSAWSPIPASKYNAAAHYHPSSERGGSNWVKGGHFLEDGPENGKQFDAPFFNITRTEAMSLDLQQRIVLENVYEALENAGLRLDEVKGSRTSVYAGAFTDDSRAIMNEDPDVLLKFKPTGTSTSIISNRISYFYDLRSTSLTLDTACSSSLVAFALGCQDLRNGGSDMSIITGVNIIESPETMYRMSNLGFLSPDGRCFSFDSRANGYSRGEGVGTVILKPVAAALRDGNTIRAIVRGTGIGQDGQGTGAMTLPNKTAQEALMREVYANYKLNLDETGLVEAHATGTAAGDPLEAGAIASTFRRVNTSGSSAKPPLYVGAGKTNHGHLEGASGVAAIIKTVLTLEQ…	gene_09261/MSLSDADLAAASPDDIAIIGLGCRFPGGATTPSKLWDIFVNGRSAWSPIPASKWNASAHYHPSSEHGGSNWVKGGHFLEDGPENGKQFDAPFFNITRTEAMSLDLQQRIVLENVYEALENAGLRLDEVKGSRTSVYAGAFTDDSRAIMNEDPDVLLKFKPTGTSSSIISNRISYFYDLKGTSLTLDTACSSSLVAFALGCQDLRNGGCEMSIITGVNIIESPETMYRMSNLGFLSPDGRCFSFDSRANGYSRGEGVGTVILKPVAAALRDGNAIRAIVRGTGIGQDGQGTGAMTLPNKVAQEALMREVYANYKLNLDETGLVEAHATGTAAGDPLEAGAIASTFRRVKTPGATAKPPLYVGAGKTNHGHLEGASGVAAIIKTVLSLEQ…
PKS5	gene_05538/MPFMCDAAEATPQCEPIAVIGIALRAPGDGSDPEKFWNMLLEGRSARCAIPEERYNVAGFYHPDGDRLGSIQQRHAHFLKQDFKVFDAPFFSVTPKEAKAMDPTHRMLLEATYEGFENAGLRLQDVAGTKTSCYIGTFTADFPSLQARDNEGPSIYHATGTSASLASNRLSWFYDLKGPSMTIDTACSSSLTAFHLGCQSIRTGEADMSVIAGANLMFGPDMSILLGAAKILSPEGKSKMWDANADGFARGEGIGVLVLKPLKAALRNGDTIRSVVLATAANEDGWTPGISLPNSDAQAELIRTAYAQAGVDPAMTGYVECHGTGTQAGDPLEAKAILKTIGANRTTDLYAGSVKTNIGHLEGAAGVAGVIKASLVVERGLIPRNLWF…	gene_07117/MPLIHEPVEATPQSEPIAVIGIALRAPGDGSDPEKFWNMLLEGRSARCAIPEDRYNVAGFYHPDGDRLGSIQQRHAHFLKQDFKVFDAPFFSVTPKEAKAMINVVITNGINSHSNGTNGTPKEDTKSKVFVLSSNDTDGVARQVESLQSYISTKSNSKSATNLLDSLAYTLSSKRTVLPWKSFAIASSNETLQKSLENVPAVVRSSNSTVPKVAFAFTGQGAQWWAMGQGLSIYKAFRESMEYSQKVLATLGCPWSLAEELSRPETDCNLRLTEYSQPACTALQVALVQLLRSWGVQPVAVVGHSSGEIAAAYTAGFISHEAAVKIAWLRGQVSSTVSKNGGMIAINASAESIEQRLSLLSQGRAVVACLNSPRSCTVSGDKSAIEEL…	gene_06288/MPLMYDASEATPQSEPIAVIGIALRAPGDGSDPEKFWNMLLEGRSARCAIPEDRYNVAGFYHPDGDRLGSIQQRHAHFLKQDFKVFDAPFFSVTPKEAKAMDPTHRMLLEATYEGFENAGLRLQDVAGTKTSCYIGTFTADFPSLQARDNEGPSIYHATGTSASLASNRLSWFYDLKGPSMTIDTACSSSLTAFHLGCQSIRTGEAEMSVIAGANLMFGPDMSILLGAAKILSPEGKSKMWDANADGFARGEGIGVIVLKPLKAALRDGDTIRSVVLATAANEDGWTPGISLPNSDAQAELIRTAYAQAGVDPALTGYVECHGTGTQAGDPLEAKAILKTIGSNRTTDLYAGSVKTNIGHLEGAAGVAGVIKASLVVERGLIPRNLWF…	gene_16074/MPLMYDASEATPQSEPIAVIGIALRAPGDGSDPEKFWNMLLEGRSARCAIPEDRYNVAGFYHPDGDRLGSIQQRHAHFLKQDFKVFDAPFFSVTPKEAKAMDPTHRMLLEATYEGFENAGLRLQDVAGTKTSCYIGTFTADFPSLQARDNEGPSIYHATGTSASLASNRLSWFYDLKGPSMTIDTACSSSLTAFHLGCQSIRTGEAEMSVIAGANLMFGPDMSILLGAAKILSPEGKSKMWDANADGFARGEGIGVIVLKPLKAALRDGDTIRSVVLATAANEDGWTPGISLPNSDAQAELIRTAYAQAGVDPAFTGYVECHGTGTQAGDPLEAKAILKTIGSNRTTDLYAGSVKTNIGHLEGAAGVAGVIKASLVVERGLIPRNLWF…	gene_12481/MPLMYDASEATPQSEPIAVIGIALRAPGDGSDPEKFWNMLLEGRSARCAIPEDRYNVAGFYHPDGDRLGSIQQRHAHFLKQDFKVFDAPFFSVTPKEAKAMDPTHRMLLEATYEGFENAGLRLQDVAGTKTSCYIGTFTADFPSLQARDNEGPSIYHATGTSASLASNRLSWFYDLKGPSMTIDTACSSSLTAFHLGCQSIRTGEAEMSVIAGANLMFGPDMSILLGAAKILSPEGKSKMWDANADGFARGEGIGVIVLKPLKAALRDGDTIRSVVLATAANEDGWTPGISLPNSDAQAELIRTAYAQAGVDPALTGYVECHGTGTQAGDPLEAKAILKTIGSNRTTDLYAGSVKTNIGHLEGAAGVAGIIKASLVVERGLIPRNLWF…	gene_10073/MPLMYDASEATPQSEPIAVIGIALRAPGDGSDPEKFWNMLLEGRSARCAIPEDRYNVAGFYHPDGDRLGSIQQRHAHFLKQDFKVFDAPFFSVTPKEAKAMDPTHRMLLEATYEGFENAGLRLQDVAGTKTSCYIGTFTADFPSLQARDNEGPSIYHATGTSASLASNRLSWFYDLKGPSMTIDTACSSSLTAFHLGCQSIRTGEAEMSVIAGANLMFGPDMSILLGAAKILSPEGKSKMWDANADGFARGEGIGVIVLKPLKAALRDGDTIRSVVLATAANEDGWTPGISLPNSDAQAELIRTAYAQAGVDPALTGYVECHGTGTQAGDPLEAKAILKTIGSNRTTDLYAGSVKTNIGHLEGAAGVAGVIKASLVVERGLIPRNLWF…	gene_10971/MEWPHQGPRRASINSFGFGGANAHVILEDAASYLARTGQTGRHFTTPKAITNGINGHANGINGSNGTSKENPKSKVFVLSSNDTDGVARQVESLQSYISIKYSSNSTAGLLDSLAYTLSSKRTVLPWKSFVIASDNETLQKNLENVPAVIRSSSSTVPKVAFAFTGQGAQWWAMGQGLSVYKVFQGSMDYSQKVLTALGCPWNLEEELSRSETDCNLRLTEYSQPACTALQVALVQLMRSWGVQPVAVVGHSSGEIAAAYTAGFISHEAAVKIAWLRGQVSSTVSKNGGMIAVNSSAESIQQRLGLLTQGRAVVACLNSPRSCTVSGDKSAIDELHDALKQDEILCTKLPMDVAYHSFHMEAARAQYEQALAGIPHEVPETGLPMFSS…	gene_05850/MPFIHEPVGATPQAKPIAVIGIALRAPGDGSDPEKFWNMLLEGRSARSEIPKERYNVDGFYHPHGDRLGSIQQRHAHFLKQDFKVFDAPFFSVTPKEAKAMDPTHRMLLETTYEGLENAGLRLQAVAGTKTSCYIGTFTADFPSLQARDNEGPSIYHATGTSASLASNRLSWFYDLKGPSMTIDTACSSSLTAFHLGCQSIRTGEAEMSIIAGANLMFGPDMSILLGAAKILSPEGKSKMWDANADGFARGEGIGVLILKPLNAALRDGDTIRSVVLATAANEDGWTPGISLPNSEAQQELIRSAYAQAGVDPATCAYVECHGTGTQAGDPLEARAIFNTIGSNRTTNLYAGSVKTNIGHLEGAAGVAGVIKASLVVERGLVPRNLWF…	gene_07936/MPLIHEKVEATPQAEPIAVIGIALRAPGDGSDPEKFWNMLLEGRSARNFKVFDAPFFSVTPKEAKAMDPTHRMLLETTYEGFESAGLRLQDVAGTKTSCYIGTFTADFPSLQARDNEGPSIYHATGTSASLASNRLSWFYDLKGPSMTIDTACSSSLTAFHLGCQSIRTGEAEMSVIAGANLMFGPDMSILLGAAKILSPEGKSKMWDANADGFARGEGIGVLILKPLKAALRDGDTIRSVVLATAANEDGWTPGISLPNSEAQQELIRTAYAQAGVDPATCAYVECHGTGTQAGDPLESKAIFNTIGSNRTTDLYAGSVKTNIGHLEGAAGVAGVIKASLVVERGLIPRNLWFEKLNDQISLPDNVKIPLDTMEWPHQGPRRASINS…	gene_03786/MPLIHEPAEAAPQSEPIAIIGIALRAPGDGSDPEKFWNMLLEGRSARCAIPEDRYNVAGFYHPDGDRLGSIQQRHAHFLKQDFKVFDAPFFSVTPKEAKAMDPTHRMLLEATYEGFENAGLRLQDVAGTKTSCYIGTFTADFPSLQARDNEGPSIYHATGTSASLASNRLSWFYDLKGPSMTIDTACSSSLTAFHLGCQSLRTGEAEMSVIAGANLMFGPDMSILLGAAKILSPEGKSKMWDANADGFARGEGIGVLVLKPLKAALRDRDTIRSVVLATAANEDGWTPGISLPSSEAQQELIRTAYAQAGVDPKTAAYVECHGTGTQAGDPLEAKAILNTIGSNRTTDLYAGSVKTNIGHLEGAAGVAGVIKASLVVERGLIPRNLWF…	gene_09106/MPLIHEPAEAAPQSEPIAIIGIALRAPGDGSDPEKFWNMLLEGRSARCAIPEDRYNVAGFYHPDGDRLGSIQQRHAHFLKQDFKVFDAPFFSVTPKEAKAMDPTHRMLLEATYEGFENAGLRLQDVAGTKTSCYIGTFTADFPSLQARDNEGPSIYHATGTSASLASNRLSWFYDLKGPSMTIDTACSSSLTAFHLGCQSLRTGEAEMSVIAGANLMFGPDMSILLGAAKILSPEGKSKMWDANADGFARGEGIGVLVLKPLKAALRDRDTIRSVVLATAANEDGWTPGISLPNSEAQQELIRTAYAQAGVDPKTAAYVECHGTGTQAGDPLEAKAILNTIGSNRTTDLYAGSVKTNIGHLEGAAGVAGVIKASLVVERGLIPRNLWF…	gene_04596/MDDHHELASRLSPSGQLHYPGSEGFGASNLRFTEYERPTYTAVVQPGCIEDVVETVKYATGRNISFSPRAGHHAVTSTMRHLQNGILIDMRTLNGLSFDEEGQTVTVGGGVITDEFVKFIHKMGMEVNVGSCPTTGVMGVSLGAGLGRLQGKYGFLHDNMVSCKLVLADGSIVTASEKKNADLFWALRGAGHNFGIAVEATFRVHKQSNRGIHYTWDLEYEIEQCDDVFRTLNEVTETMPKELAIFVLWMRKSTEGKQVRPAHSPPQNNTTDTSWMKHMILVNLVWSGAEAEADPWIARFEAIKPAIHSGKVGVEWPELPWTTYKGYNKYLSMPEVWTVAPYKMMSAACVKKFDLQITREFFESVKAKNIEFAGKGTFGAMFECLPHH…	gene_05642/MPLIYDQAEALPQSEPIAVIGIALRAPGDGSDPEKFWNMLLEGRSARSEIPKERYDVDGFYHPNGDRLGSIQQRHAHFLKQDFKDPTHRMLLETTYEGFENAGLRLQDIAGTKTSCYIGTFTADFPSLQARDNEGPSIYHATGTSASLASNRLSWFYDLKGPSMTIDTACSSSLTAFHLGCQSIRTGEAEMSVIAGANLMFGPDMSILLGAAKILSPEGKSKMWDANADGFARGEGIGVLILKPLKAALRDGDTIRSVVLATAANEDGWTPGISLPNSEAQQELIRTAYAQAGVSPSTTAYVEAHGTGTQAGDPLEAKAILNTIGANRTSDLYVGSVKTNIGHLEGAAGVAGVIKASLIVERGLIPRNLWFEKLNAQISLPNNVKIPL…	gene_09184/MPLIHDQVKAEALPQSEPIAVIGIALRAPGDGSDPEKFWSMLLEGRSARSEIPKERYDVDGFYHPNGDRLGSIQQRHAHFLKQDFKVFDAPFFSVTPKEAKAMDPTHRMLLETTYEGFENAGLRLQDIAGTKTSCYIGTFTADFPSLQARDNEGPSIYHATGTSASLASNRLSWFYDLKGPSMTIDTACSSSLTAFHLGCQSIRTGEAEMSVIAGANLMFGPDMSILLGAAKILSPEGKSKMWDANADGFARGEGIGVLVLKPLKAALRDGDTIRSVVLATAANEDGWTPGISLPNSEAQKELIRTAYAQAGVDPASCSYIECHGTGTQAGDPLEAKAVLGTVGLNRTTDLYAGSVKTNIGHLEGAAGVAGVIKASLIVERGLIPRNL…	gene_02693/MPLIHDQAEALPQSEPIAVIGIALRAPGDGSDPEKFWNMLLEGRSARGEIPKERYDVDGFYHPNGDRLGSIQQRHAHFLNQDFKVFDAPFFSVTPKEAKAMDPTHRMLLETTYEGFENAGLRLQDIAGTKTSCYIGTFTADFPSLQARDNEGPSIYHATGTSASLASNRLSWFYDLKGPSMTIDTACSSSLTAFHLGCQSIRTGEAEMSVIAGANLMFGPDMSILLGAAKILSPEGKSKMWDANADGFARGEGIGVLILKPLKAALRDGDTIRSVVLATAANEDGWTPGISLPNSEAQQELIRTAYAQAGVDPSTTAYVEAHGTGTQAGDPLEAKAILNTIGANRTTDLYVGSVKTNIGHLEGAAGVAGVIKASLIVERGLIPRNLWF…	gene_00097/MPLIHEQAEATPLSEPIAIIGIALRAPGDGSDPEKFWNMLLEGRSARSEIPKERYNVDGFYHPNGDRLGSIQQRHAHFLKQDFKVFDAPFFSVTPKEAKAMDVAGTKTSCYIGTFTADFPSLQARDNEGPSIYHATGTSASLASNRLSWFYDLKGPSMTIDTACSSSLTAFHLGCQSIRTGEAEMSVIAGANLMFGPDMSILLGAAKILSPEGKSKMWDANADGFARGEGIGVLILKPLKAAIRDGDTIRSVVLTTAVNEDGYTPGISLPNSEAQQELIRTAYAQAGIDPATTAYVEAHGTGTQAGDPLEAKAILNTIGANRTTDLYVGSVKTNIGHLEGAAGVAGVIKASLIVERGLIPRNLWFEKLNDQISLPDNVKIPLDTMEWP…	gene_04648/MSSMHDQAEARPQSEPIAIIGIALRAPGDGSDPEKFWNMLLEGRSARCPIPKDRYNVDGFYHPNGDRLGSIQQREAHFLKQDFKVFDAPFFSVTPKEAKAMDPTHRMLLETTYEAFENSGKSLQEVAGTRTSCYIGTFTADFPSLQARDNEGPSIYHATGTSASLASNRLSWFYDLKGPSMTIDTACSSSLTAFHLGCQSIRTGEAEMSVIAGANLMFGPDMSILLGAAKILSPEGKSKMWDANADGFARGEGIGVLVLKPLKAALRDGDTIRSVVLATAANEDGYTPGISLPNSEAQQELIRTAYAQAGVDPATTGYVECHGTGTQAGDPLEAKAILKTIGSNRTTDLYAGSVKTNIGHLEGAAGVAGVIKAALVCERGLIPRNLWF…	gene_02941/MPLIHEQAEAAPKAEPIAVIGIALRAPGDGSDPEKFWNMLLEGRSARSEIPKERYNVDGFYHPNGDRLGSIQQRHAHFLKQDFKVFDAPFFSVTPKEAKAMDPTHRMLLEATYEGFENAGLRLQDVAGTKTSCYIGTFTADFPSLQARDNEGPSIYHATGTSASLASNRLSWFYDLKGPSMTIDTACSSSLTAFHLGCQSIRTGEAEMSVIAGANLMFGPDMSILLGAAKILSPEGKSKMWDANADGFARGEGIGVLILKPLKAALRDGDTIRSVVLATAANEDGWTPGISLPNSEAQQELIRTAYAQAGVDPATCAYVECHGTGTQAGDPLEARAILNTIGSNRTTDLYAGSVKTNIGHLEGAAGVAGVIKASLIVERGLIPRNLWF…	gene_09796/MPLIHDQGKAEALPQSEPIAVIGIALRAPGDGSDPEKFWNMLLEGRSARSEIPKERYDVDGFYHPNGDRLGSIQQRHAHFLKQDFKVFDAPLFLGDAKGSKGHGFENAGLRLQDIAGTKTSCYIGTFTADFPSLQARDNEGPSIYHATGTSASLASNRLSWFYDLKGPSMTIDTACSSSLTAFHLGCQSIRTGEAEMSVIAGANLMFGPDMSILLGAAKILSPEGKSKMWDANADGFARGEGIGVLILKPLKAALRDGDTIRSVVLATAANEDGWTPGISLPNSEAQKELIRTAYAQAGVDPASCSYIECHGTGTQAGDPLEEKAVLGTVGLNRTTDLYAGSVKTNIGHLEGAAGVAGVIKASLVVERGLIPRNLWFEKLNEQISLPD…	gene_04340/MPLIHDQGKAEALPQSEPIAVIGIALRAPGDGSDPEKFWNMLLEGRSARSEIPKERYDVDGFYHPNGDRLGSIQQRHAHFLKQDFKVFDAPFFSVTPKEAKAMDPTHRMLLETTYEGFENAGLRLQDIAGTKTSCYIGTFTADFPSLQARDNEGPSIYHATGTSASLASNRLSWFYDLKGPSMTIDTACSSSLTAFHLGCQSIRTGEAEMSVIAGANLMFGPDMSILLGAAKILSPEGKSKMWDANADGFARGEGIGVLILKPLKAALRDGDTIRSVVLATAANEDGWTPGISLPNSEAQKELIRTAYAQAGVDPASCSYIECHGTGTQAGDPLEAKAVLGTVGLNRTTDLYAGSVKTNIGHLEGAAGVAGVIKASLVVERGLIPRNL…	gene_07456/MPLMYDASEATPQSEPIAVIGIALRAPGDGSDPEKFWNMLLEGRSARCAIPEDRYNVAGFYHPDGDRLGSIQQRHAHFLKQDFKVFDAPFFSVTPKEAKAMDPTHRMLLEATYEGFENAGLRLQDVAGTKTSCYIGTFTADFPSLQARDNEGPSIYHATGTSASLASNRLSWFYDLKGPSMTIDTACSSSLTAFHLGCQSIRTGEAEMSVIAGANLMFGPDMSILLGAAKILSPEGKSKMWDANADGFARGEGIGVIVLKPLKAALRDGDTIRSVVLATAANEDGWTPGISLPNSDAQAELIRTAYAQAGVDPALTGYVECHGTGTQAGDPLEAKAILKTIGSNRTTDLYAGSVKTNIGHLEGAAGVAGVIKASLVVERGLIPRNLWF…
PKS6	gene_00740/MADQMAFLLFGDQSLDTHGFLADFYRLGNPSVLSKAFLEAAGEALRVEVEQLPRVERTKIPMFRTLRQLNERYHAQSIKYPGIDSALLCVAQLAHYIDRSEKEYQDVTEPENTYLSGLCTGLFAASAIASSPSLSSLLPIAVQVVLMAYRVGSHVASLAERLSPSTEKSESWTYVVPGAKETTAKSILDEFHKSEGISQASHAYVSAISASNIAVSGPPATLKSLFSKDLFDSRPTAIPVYGPYHAAHLHATADLDAILRLNDESVSAALADSKPRSSVMSCVTGASFTETDTKSLLKAVVREILNEPLLFHKALSGSIGHARAFKGTRALVIPYGPTQAAGTLANLLKAQTQLEVVLRNPPTISRESNTASIGNHGSTGKCKLAIVG…	gene_02013/MADQMAFLLFGDQSLDTHGFLADFYRLGNPSVLSKAFLEAAGEALRVEVEQLPRVERTKIPMFRTLRQLNERYHAQSIKYPGIDSALLCVAQLAHYIDRSEKEYQDATEPENTYLSGLCTGLFAASAIASSPSLSSLLPIAVQVVLMAYRVGSHVASLAERLSPSTDKSESWTYVVPGAKESTAKSILDDFHKSEGISQASHAYVSAVSASNIAVSGPPATLKSLFSKDLFDSRPTAIPVYGPYHASHLHATADLDAILRLNDDSVSAALADSKPRSSVMSCVTGASFTETDTKALLRAVVWEILNEPLLFHKALSGSIGHARGFKGTRALVIPYGPTQAAGTLANLLKTQTELEVVLRNPPTISRESNTASIGNHGSVGKCKLAIVG…	gene_09736/MADQMAFLLFGDQSLDTHGFLADFYRLGNPSVLSKAFLEAAGEALRVEVEQLPRVERTKIPMFRTLRQLNERYHAQSIKYPGIDSALLCVAQLAHYIDRSEKEYQDATEPENTFLSGLCTGLFAASAIASSPSLSSLLPIAVQVVLMAYRVGSHVASLAERLSPSTEKSESWTYVVPGAKETTAKSILDEFHKSEGISQASHAYVSAVSASNIAVSGPPATLKLLFSKDLFDSRPTAIPVYGPYHAAHLHATADLDAILRLNDDSVSAALADSKPRSSVMSCVTGASFTETDTKSLLKAVVWEILNEPLLFHKALSGSIGHARGFKGTRALVIPYGPTQAAGTLANLLKAQTQLEVVLRNPPTISRESNIASIGNHGSTGKCKLAIVG…	gene_02585/MADQMAFLLFGDQSLDTHGFLADFYRLGNPSVLSKAFLEAAGEALRVEVEQLPRVERTKIPMFRTLRQLNERYHAQSIKYPGIDSALLCVAQLAHYIDRSEKEYQDATEPENTFLSGLCTGLFAASAIASSPSLSSLLPIAVQVVLMAYRVGSHVASLAERLSPSTEKSESWTYVVPGAKETTAKSILDEFHKSEGISQASHAYVSAVSASNIAVSGPPATLKLLFSKDLFDSRPTAIPVYGPYHAAHLHATADLDAILRLNDDSVSAALADSKPRSSVMSCVTGASFTETDTKSLLKAVVWEILNEPLLFHKALSGSIGHARGFKGTRALVIPYGPTQAAGTLANLLKAQTQLEVVLRNPPTISRESNTASIGNHGSTGKCKLAIVG…	gene_07860/MADQMAFLLFGDQSLDTHGFLADFYRLGNPSVLSKAFLEAAGEALRVEVEQLPRVERTKIPMFRTLRQLNERYHAQSIKYPGIDSALLCVAQLAHYIDRSEKEYQDATEPENTFLSGLCTGLFAASAIASSPSLSSLLPIAVQVVLMAYRVGSHVASLAERLSPSTEKSESWTYVVPGAKETTAKSILDEFHKSEGISQASHAYVSAVSASNIAVSGPPATLKLLFSKDLFDSRPTAIPVYGPYHAAHLHATADLDAILRLNDDSVSAALADSKPRSSVMSCVTGASFTETDTKSLLKAVVWEILNEPLLFHKALSGSIGHARGFKGTRALVIPYGPTQAAGTLANLLKAQTQLEVVLRNPPTISRESNIASIGNHGSTGKCKLAIVG…	gene_06287/MADQMAFLLFGDQSLDTHGFLADFYRLGNPSVLSKAFLEAAGEALRVEVEQLPRVERTKIPMFRTLRQLNERYHAQSIKYPGIDSALLCVAQLAHYIDRSEKEYQDATEPENTFLSGLCTGLFAASAIASSPSLSSLLPIAVQVVLMAYRVGSHVASLAERLSPSTEKSESWTYVVPGAKETTAKSILDEFHKSEGISQASHAYVSAVSASNIAVSGPPATLKLLFSKDLFDSRPTAIPVYGPYHAAHLHATADLDAILRLNDDSVSAALADSKPRSSVMSCVTGASFTETDTKSLLKAVVWEILNEPLLFHKALSGSIGHARGFKGTRALVIPYGPTQAAGTLANLLKAQTQLEVVLRNPPTISRESNIASIGNHGSTGKCKLAIVG…	gene_00806/MADQMAFLLFGDQSLDTHGFLADFYRLGNPSVLSKAFLEAAGEALRVEVEQLPRVERTKIPMFRTLRQLNERYHAQSIKYPGIDSALLCVAQLAHYIDRSEKEYQDATEPENTFLSGLCTGLFAASAIASSPSLSSLLPIAVQVVLMAYRVGSHVASLAERLSPSTEKSESWTYVVPGAKETTAKSILDEFHKSEGISQASHAYVSAVSASNIAVSGPPATLKLLFSKDLFDSRPTAIPVYGPYHAAHLHATADLDAILRLNDDSVSAALADSKPRSSVMSCVTGASFTETDTKSLLKAVVWEILNEPLLFHKALSGSIGHARGFKGTRALVIPYGPTQAAGTLANLLKAQTQLEVVLRNPPTISRESNIASIGNHGSTGKCKLAIVG…	gene_07383/MADQMAFLLFGDQSLDTHGFLADFYRLGNPSVLSKAFLEAAGEALRVEVEQLPRVERTKIPMFRTLRQLNERYHAQSIKYPGIDSALLCVAQLAHYIDRSEKEYQDATEPENTYLSGLCTGLFAASAIASSPSLSSLLPIAVQVVLMAYRVGSHVASLAERLSPSSEKSESWTYVVPGAKESTAKSILDDFHKSEGISQASHAYVSAISASNIAVSGPPATLKSLFSKDLFDSRPTAIPVYGPYHAAHLHATADLDAILRLNDESVSAALADSKPRSSVMSCVTGASFTETDTKSLLKAVVWEILNEPLLFHKALSGSIGHARGFKGTRALVIPYGPTQAAGTLASLLKAQTQLEVPPAISRESNSASIGNHGTTGKCKLAIVGMAGR…	gene_04254/MADQMAFLLFGDQSLDTHGFLADFYRLGNPSVLSKAFLEAAGEALRVEVEQLPRVERTKIPMFRTLRQLNERYHAQSIKYPGIDSALLCVAQLAHYIDRSEKEYQDATEPENTYLSGLCTGLFAASAIASSPSPLVAPSYRSPERLSPSSEKSESWTYVVPGAKESTAKSILDDFHKSEGISQASHAYVSAISASNIAVSGPPATLKSLFSKDLFDSRPTAIPVYGPYHAAHLHATADLDAILRLNDESVSAALADSKPRSSVMSCVTGASFTETDTKSLLKAVVWEILNEPLLFHKALSGSIGHARGFKGTRALVIPYGPTQAAGTLANLLKAQTQLEVVLRSPPAISRESNSASIGNHGSTGKCKLAIVGMAGRFPDSASVEAFWE…	gene_00347/MADQMAFLLFGDQSLDTHGFLADFYRLGNPSVLSKAFLEAAGEALRVEVEQLPRVERTKIPMFRTLRQLNERYHAQSIKYPGIDSALLCVAQLAHYIDRSEKEYQDATEPENTYLSGLCTGLFAASAIASSPSLSSLLPIAVQVVLMAYRVGSHVASLADRLSPSTEKSESWTYVVPGAKESTAKSILDDFHKSEGISQASHAYVSAVSASNIAVSGPPATLKSLFSKDLFDSRPTAIPVYGPYHAAHLHASADLDEILRLNDDSVSAALAGSKPRSSVMSCVTGASFAETDTKALLKAVVWEILNEPLLFHKALSGSIGHARAFKGTRALVIPYGPTQAAGTLANLLKTQTELEVVLRNPPTISRESNTASIGNHGSTGKCKLAIVG…	gene_07172/MADQMAFLLFGDQSLDTHGFLADFYRLGNPSVLSKAFLEAAGEALRVEVEQLPRVERTKIPMFRTLRQLNERYHAQSIKYPGIDSALLCVAQLAHYIDRSEKEYQDATEPENTYLSGLCTGLFAASAIASSPSLSSLLPIAVQVVLMAYRVGSHVASLADRLSPSTEKSESWTYVVPGAKESTAKSILDDFHKSEGISQASHAYVSAVSASNIAVSGPPATLKSLFSKDLFDSRPTAIPVYGPYHAAHLHASADLDEILRLNDDSVSAALAGSKPRSSVMSCVTGASFAETDTKALLKAVVWEILNEPLLFHKALSGSIGHARAFKGTRALVIPYGPTQAAGTLANLLKTQTELEVVIGNHGSTGKCKLAIVGMAGRFPDSASVEAFW…	gene_15550/MADQMAFLLFGDQSLDTHGFLADFYRLGNPSVLSKAFLEAAGEALRVEVEQLPRVERTKIPMFRTLRQLNERYHAQSIKYPGIDSALLCVAQLAHYIDRSEKEYQDATEPENTYLSGLCTGLFAASAIASSPSLSSLLPIAVQVVLMAYRVGSHVASLAERLSPSAEKSESWTYVVPGAKEATAKSVLDDFHKSEGISQAAHAYVSAVSASNIAVSGPPATLKSLFSKDLFDSRPTAIPVYGPYHAAHLHATADLDAILRLNDESVSAALADSKPRSSVMSCVTGASFTETDTKSLLKAVVWEILNEPLLFHKALSGSIGHARDFKGTRALVIPYGPTQAAGTLANLLKAQTELEVVLRNPPAISRESNTASIGNHGSTGKCKLAIVG…	gene_04025/MADQMAFLLFGDQSLDTHGFLADFYRLGNPSVLSKAFLEAAGEALRVEVEQLPRVERTKIPMFRTLRQLNERYHAQSIKYPGIDSALLCVAQLAHYIDRSEKEYQDATEPENTYLSGLCTGLFAASAIASSPSLSSLLPIAVQVVLMAYRVGSHVASLAERLSPSAEKSESWTYVVPGAKEATAKSVLDDFHKSEGISQAAHAYVSAVSASNIAVSGPPATLKSLFSKDLFDSRPTAIPVYGPYHAAHLHATADLDAILRLNDESVSAALADSKPRSSVMSCVTGASFTETDTKSLLKAVVWEILNEPLLFHKALSGSIGHARDFKGTRALVIPYGPTQAAGTLANLLKAQTELEVVLRNPPAISRESNTASIGNHGSTGKCKLAIVG…	gene_02212/MADQMAFLLFGDQSLDTHGFLADFYRLGNPSVLSKAFLEAAGEALRVEVEQLPRVERTKIPMFRTLRQLNERYHAQSIKYPGIDSALLCVAQLAHYIDRSEKEYQDATEPENTYLSGLCTGLFAASAIASSPSLSSLLPIAVQVVLMAYRVGSHVASLAERLSPSTEKSESWTYVVPGAKEATAKSILEDFHKSEGISQAAHAYVSAVSASNIAVSGPPATLKLLFSKDLFDSRPTAIPVYGPYHASHLHATADLDAILRLNDESVSAALADSKPRSSVMSCVTGASFTETDTKALLKAVVWEILNEPLLFHKALSGSIGHARGFKGTRALVIPYGPTQAAGTLANLLKTQTELEVCKLAIVGMAGRFPDSASVEAFWELLEKGIDAH…	gene_10218/MADQMAFLLFGDQSLDTHGFLADFYRLGNPSVLSKAFLEAAGEALRVEVEQLPRVERTKIPMFRTLRQLNERYHAQSIKYPGIDSALLCVAQLAHYIDRSEKEYQDATEPENTYLSGLCTGLFAASAIASSPSLSSLLPIAVQVVLMAYRVGSHVASLAERLSPSAEKSESWTYVVPGAKEATAKSILDDFHKSEGISQAAHAYVSAVSASNIAVSGPPATLKSLFSKDLFDSRPTAIPVYGPYHAAHLHATADLDAILRLNDDSVSAALADSKPRSSVMSCVTGASFTETDTKSLLKAVVWEILNEPLLFHKALSGSIGHARDFKGTRALVIPYGPTQAAGTLANLLKAQTELEVVLRNPPAISRESNTASIGNHGSTGKCKLAIVG…	gene_11093/MADQMAFLLFGDQSLDTHGFLADFYRLGNPSVLSKAFLEASGEALRLEVEQLPRVERTKIPMFRTLRQLNERYYAQSIKYPGIDSALLCVAQLAHYIDRSEKEYQDATEPENTYLSGLCTGLFAASAIASSPSLSSLLPIAVQVVLMAYRVGSHVASLAERLSPSSGKSESWTYVVPGAKESTAKSILDDFHKSEGISQASHAYVSAVSASNIAVSGPPATLKSLFSKDLFDSRPTAIPVYGPYHASHLHATADLDAILRLNDDSVSAALADSKPRSSVMSCVTGASFTETDTKSLLKAVVWEILNEPLLFHKALSGSIGHARGFKGTRALVIPYGPTQAAGTLANLLKTQTQLEVVLRNPPTISRESNSASIGNHGTTGKCKLAIVG…	gene_12545/MADQMAFLLFGDQSLDTHGFLADFYRLGNPSVLSKAFLEQAGEALRAEVEQLPRVERTKIPMFRTLRQLNEKYHAQSVKYPGIDSALLCVAQLAHYIDRSEKEYQDVTDPENTYLSGLCTGLFAASAIASSPSLSSLLPIAVQVVLMAFRVGSHVASLAERLSPSTEKSESWTYVVPGAKESTAKSILADFHKSEGISQASHAYVSAVSASNIAVSGPPATLKSLFSKDLFDSRPTAIPVYGPYHAAHLHATADLDEILRLNDDSVTAALAESKPQSSVMSCVTGASFTESDTKSLLKAVVWEILNEPLLFHKALSGSIGHARSFKGTRALVIPYGPTQAAGTLANLLKAQTQLDVVLRNPPVISRESNSANIGNHGSIGKCKLAIVG…	gene_01717/MADQMAFLLFGDQSLDTHGFLADFYRLGNPSVLSKAFLEAAGEALRVEVEQLPRVERTKIPMFRTLRQLNERYHAQSIKYPGIDSALLCVAQLAHYIDRSEKEYQDATEPENTYLSGLCTGLFAASAIASSPSLSSLLPIAVQVVLMAYRVGSHVASLAERLSPSSEKSESWTYVVPGAKESTAKSILEDFHKSEGISQASHAYVSAISASNIAVSGPPATLKSLFSKDLFDSRPTAIPVYGPYHAAHLHATADLDAILRLNDESVSAALADSKPRSSVMSCVTGASFTETDTKSLLKAVVWEILNEPLLFHKALSGSIGHARGFKGTRALVIPYGPTQAAGTLANLLKAQTQLEVVLRNPPAISRESNSASIGNHGSTGKCKLAIVG…	gene_00654/MADQMAFLLFGDQSLDTHGFLADFYRLGNPSVLSKAFLEAAGEALRVEVEQLPRVERTKIPMFRTLRQLNERYHAQSIKYPGIDSALLCVAQLAHYIDRSEKEYQDATEPENTYLSGLCTGLFAASAIASSPSLSSLLPIAVQVVLMAYRVGSHVASLAERLSPSTEKSESWTYVVPGAKEATAKSILEDFHKSEGISQAAHAYVSAVSASNIAVSGPPATLKLLFSKDLFDSRPTAIPVYGPYHASHLHATADLDAILRLNDESVSAALVDSKPRSSVMSCVTGASFTETDTKSLLKAVVWEILNEPLLFHKALSGSIGHARGFKGTRALVIPYGPTQAAGTLANLLKTQTELEVVLRSPPAISRESNTASIGNHGSTGKCKLAIVG…	gene_09989/MADQMAFLLFGDQSLDTHGFLADFYRLGNPSVLSKAFLEAAGEALRVEVEQLPRVERTKIPMFRTLRQLNERYHAQSIKYPGIDSALLCVAQLAHYIDRSEKEYQDATEPENTYLSGLCTGLFAASAIASSPSLSSLLPIAVQVVLMAYRVGSHVASLAERLSPSTEKSESWTYVVPGAKEATAKSILEDFHKSEGISQAAHAYVSAVSASNIAVSGPPATLKLLFSKDLFDSRPTAIPVYGPYHASHLHATADLDAILRLNDESVSAALVDSKPRSSVMSCVTGASFTETDTKSLLKAVVWEILNEPLLFHKALSGSIGHARGFKGTRALVIPYGPTQAAGTLANLLKTQTELEVVLRSPPAISRESNTASIGNHGSTGKCKLAIVG…	gene_05053/MADQMAFLLFGDQSLDTHGFLADFYRLGNPSVLSKAFLEAAGEALRVEVEQLPRVERTKIPMFRTLRQLNERYHAQSIKYPGIDSALLCVAQLAHYIDRSEKEYQDATEPENTFLSGLCTGLFAASAIASSPSLSSLLPIAVQVVLMAYRVGSHVASLAERLSPSTEKSESWTYVVPGAKETTAKSILDEFHKSEGISQASHAYVSAVSASNIAVSGPPATLKLLFSKDLFDSRPTAIPVYGPYHAAHLHATADLDAILRLNDDSVSAALADSKPRSSVMSCVTGASFTETDTKSLLKAVVWEILNEPLLFHKALSGSIGHARGFKGTRALVIPYGPTQAAGTLANLLKAQTQLEVVLRNPPTISRESNIASIGNHGSTGKCKLAIVG…
PKS7	gene_00643/MALPEPDKMEPIAVVGMGCRFPGDATSPSNLWTMLIQGESAWSTFPEDRVNIASYFHPSGNRQGSICFNGAHFLKQDVSAFDASFFSIPTDEANAIDPQQRMLLEVAVEALDAAGVDREALRKSETGVWVGSFVKDYEQIALRDPDDSPKYGATGNGIAIMSNRISYFLDVNGPSMTIDTGCSASLVCLHNACQALRSGEIDMGLAGGAGLILTPNTMMPMTALNFLSPDGKCYTFDERANGYGRGEGIGIIVLKRLADAIRDNDNIRGVIRGSRVNQDGRTSGITLPSAEAQIRNIRAVYDRAGLTPDQTAFVECHGTGTPAGDHRELQAVSEALCQQRTTDDPMYVGSIKTNLGHLEGCAGIAGVIKSILTIEHGIIPRHLNFQAP…	gene_10274/MAHSEPDKMEPIAVIGMGCRFPGDATSPNNLWKMLIQGESAWSTFPKDRVNIHSYFHPSGNRQGSICFNGAHFLKQDVSAFDASFFSIPTDEANAIDPQQRMLLEVAVEALDSAGVDREALRKSETGVWVGSFVKDYEQIALRDPDDSPKYGATGNGIAIMSNRISYFLDINGPSMTIDTGCSASLVCLHNACQALRSGEIDMGLAGGAGLILTPNTMMPMTALNFLSPDGKCYTFDERANGYGRGEGIGIIIVKRLTDAIRDNDNIRGVIRGSRVNQDGRTSGITLPSAEAQIRNINGVYERAGLAPEQTGYVECHGTGTPAGDHRELQAISGALCRKRSTDNPMYVGSVKVNLGHLEGCAGVAGVIKSILTIEHGIIPKHLNFQAP…	gene_11455/MAHPEPDRMEPIAVVGMGCRFPGNATSPSNLWTMLVQGESAWSTFPEDRVNIASYFHPSGNRQGSICFNGAHFLKQDVSAFDASFFSIPTDEANAIDPQQRMLLEVAVEALDAAGVDREALRKSETGVWVGSFVKDYEQIALRDPDDSPKYGATGNGIAIMSNRISYFLDVNGPSMTIDTGCSASLVCLHNACQALRSGEIDMGLAGGAGLILTPNTMMPMTALNFLSPDGKCYTFDERANGYGRGEGIGIIVLKRLTDAIRHNDNIRGVIRGSRVNQDGRTSGITLPSAEAQIRNIRAVYERAGLTPDQTAFVECHGTGTPAGDHRELQAVSEALCQQRPTDDPMYVGSIKTNLGHLEGCAGIAGVIKSILTIEHGIIPKHLNFEAP…	gene_15200/MAHPEPDKMEPIAVVGMGCRFPGNATSPSNLWTMLVQGESAWSTFPEDRVNIASYFHPSGNRQGSICFNGAHFLKQDVSAFDASFFSIPTDEANAIDPQQRMLLEVAVEALDAAGVDREALRKSETGVWVGSFVKDYEQIALRDPDDSPKYGATGNGIAIMSNRISYFLDVNGPSMTIDTGCSASLVCLHNACQALRSGEIDMGLAGGAGLILTPNTMMPMTALNFLSPDGKCYTFDERANGYGRGEGIGIIVLKRLTDAIRHNDNIRGVIRGSRVNQDGRTSGITLPSAEAQIRNIRAVYERAGLTPDQTAFVECHGTGTPAGDHRELQAVSEALCQQRPTDDPMYVGSIKTNLGHLEGCAGIAGVIKSILTIEHGIIPKHLNFEAP…	gene_04956/MAHPEPDRMEPIAVVGMGCRFPGNATSPSNLWTMLVQGESAWSTFPEDRVNIASYFHPSGNRQGSICFNGGHFLKQDVSAFDASFFSIPTDEANAIDPQQRMLLEVAVEALDAAGVDREALRKSETGVWVGSFVKDYEQIALRDPDDSPKYGATGNGIAIMSNRISYFLDVNGPSMTIDTGCSASLVCLHNACQALRSGEIDMGLAGGAGLILTPNTMMPMTALNFLSPDGKCYTFDERANGYGRGEGIGIIVLKRLTDAIRHNDNIRGVIRGSRVNQDGRTSEVNYAGITLPSAEAQIRNIRAVYERAGLTPDQTAFVECHGTGTPAGDHRELQAVSEALCQQRPTDDPMYVGSIKTNLGHLEGCAGIAGVIKSILTIEHGIIPKHL…	gene_12771/MAHPEPDRMEPIAVVGMGCRFPGNATSPSNLWTMLVQGESAWSTFPEDRVNIASYFHPSGNRQGSICFNGAHFLKQDVSAFDASFFSIPTDEANAIDPQQRMLLEVAVEALDAAGVDREALRKSETGVWVGSFVKDYEQIALRDPDDSPKYGATGNGIAIMSNRISYFLDVNGPSMTIDTGCSASLVCLHNACQALRSGEIDMGLAGGAGLILTPNTMMPMTALNFLSPDGKCYTFDERANGYGRGEGIGIIVLKRLTDAIRHNDNIRGVIRGSRVNQDGRTSGITLPSAEAQIRNIRAVYERAGLTPDQTAFVECHGTGTPAGDHRELQAVSEALCQQRPTDDPMYVGSIKTNLGHLEGCAGIAGVIKSILTIEHGIIPKHLNFEAP…	gene_03570/MAHPEPDKMEPIAVVGMGCRFPGNATSPSNLWTMLVQGESAWSTFPEDRVNIASYFHPSGNRQGSICFNGAHFLKQDVSAFDASFFSIPTDEANAIDPQQRMLLEVAVEALDAAGVDREALRKSETGVWVGSFVKDYEQIALRDPDDSPKYGATGNGIAIMSNRISYFLDVNGPSMTIDTGCSASLVCLHNACQALRSGEIDMGLAGGAGLILTPNTMMPMTALNFLSPDGKCYTFDERANGYGRGEGIGIIVLKRLTDAIRHNDNIRGVIRGSRVNQDGRTSGITLPSAEAQIRNIRAVYERAGLTPDQTAFVECHGTGTPAGDHRELQAVSEALCQQRPTDDPMYVGSIKTNLGHLEGCAGIAGVIKSILTIEHGIIPKHLNFEAP…	gene_03341/MAHPEPDKMEPIAVVGMGCRFPGNATSPDNLWNMLKQGESAWSTFPADRVNIASYFHPSGNRQGSICFNGAHFLKQDVAAFDASFFSIPTDEANAIDPQQRMLLEVAVEALDSAGVDREALRKSETGVWVGSFVKDYEQIVLRDPDDSPKYGATGNGIAIMSNRISYFLDVNGPSMTIDTGCSASLVCLHNACQALRSGEIDMGLAGGAGLILTPNTMMPMTALNFLSPDGKCYTFDERANGYGRGEGIGIIVVKRLADALRDNDNIRAVIRGSRVNQDGRTSGITLPSAEAQIRNIRGVYERAGLAPEQTAFVECHGTGTPAGDHRELQAVSETLCQQRSTESPIYVGSVKTNIGHLEGCAGVAGVIKSICTLEHGIIPKHLNFQAP…	gene_09698/MAHPEPDKMEPIAVVGMGCRFPGNATSPDNLWNMLKQGESAWSTFPVDRVNIASYFHPSGNRQGSICFNGAHFLKQDVAAFDASFFSIPTDEANAIDPQQRMLLEVAVEALDSAGVDREALRKSETGVWVGSFVKDYEQIVLRDPDDSPKYGATGNGIAIMSNRISYFLDVNGPSMTIDTGCSASLVCLHNACQALRSGEIDMGLAGGAGLILTPNTMMPMTALNFLSPDGKCHTFDERANGYGRGEGIGIIVVKRLTDALRDNDNIRAVIRGSRVNQDGRTSEAQIRNIRGVYERAGLSPEQTAFVECHGTGTPAGDHRELQAVAETLCQQRSTENPIYAPGSHRINFAEWKLKVALENTKWPVNGLRRASVNCFGFGGTNAHVIID…	gene_11122/MAHSEPDKMEPIAVVGMGCRFPGDATSPNNLWRMLIQGESAWSTFPKDRVNIASYFHPSGSRQGSICFNGAHFLKQDVSAFDASFFSIPTDEANAIDPQQRMLLEVAVEALDSAGVDREALRKSETGVWVGSFVKDYEQIALRDPDDSPKYGATGNGIAIMSNRISYFLDIHGPSMTIDTGCSASLVCLHNACQALRSGEIDMGLAGGAGLILTPNTMMPMTALNFLSPDGKCYTFDERANGYGRGEGIGIIIVKRLRDAIRDNDNIRGVIRGSRVNQDGRTSEAQIRNIRGVYERAGLSPEQTAFVECHGTGTPAGDHRELQAISGALCQNRSADAPVYVGSVKVNLGHLEGCAGVAGMIKSILTIEHGIIPKHLNFEAPGSHRINF…	gene_00799/MAHSEPDKMEPIAVVGMGCRFPGDATSPNNLWRMLIQGESAWSTFPKDRVNIASYFHPSGSRQGSICFNGAHFLKQDVSAFDASFFSIPTDEANAIDPQQRMLLEVAVEALDSAGVDREALRKSETGVWVGSFVKDYEQITLRDPDDSPKYGATGNGIAIMSNRISYFLDIHGPSMTIDTGCSASLVCLHNACQALRSGEIDMGLAGGAGLILTPNTMMPMTALNFLSPDGKCYTFDERANGYGRGEGIGIIIVKRLRDAIRDNDNIRGVIRGSRVNQDGRTSEAQIRNIRGVYERAGLSPEQTAFVECHGTGTPAGDHRELQAISGALCQNRSADAPVYVGSVKVNLGHLEGCAGVAGMIKSILTIEHGIIPKHLNFEAPGSHRINF…	gene_12184/MAHSEPDKMEPIAVIGMGCRFPGNATSPNNLWQMLVSGESAWSTFPEDRVNIASYFHPSGNRQGSICFNGAHFLQQDVAAFDAPFFSIPTDEANATDPQQRMLLEVAVEALDSAGVDRDALRKSETGVWVGSFVKDYEQIALRDPDDSPKYGATGNGIAIMSNRISYFLDVNGPSMTIDTGCSASLVCLHNACQALRSGEIDMGLVGGAGLILTPNTMMPMTALNFLSPDGKCYTFDERANGYGRGEGIGIIVVKRLSDAIRDNDNIRGVIRGSRVNQDGRTSGITLPSAEAQIRNIRSVYDRAGLTPDQTAFVECHGTGTPAGDHRELQAVSESLCQQRSAESPIYVGSVKTNVGHLEGCAGVAGMIKSILSLEHGIIPQHLNFQAP…	gene_11389/MAHSEPDKMEPIAVIGMGCRFPGNATSPNNLWQMLVSGESAWSTFPEDRVNIASYFHPSGNRQGSICFNGAHFLQQDVAAFDAPFFSIPTDEANATDPQQRMLLEVAVEALDSAGVDRDALRKSETGVWVGSFVKDYEQIALRDPDDSPKYGATGNGIAIMSNRISYFLDVNGPSMTIDTGCSASLVCLHNACQALRSGEIDMGLVGGAGLILTPNTMMPMTALNFLSPDGKCYTFDERANGYGRGEGIGIIVVKRLSDAIRDNDNIRGVIRGSRVNQDGRTSGITLPSAEAQIRNIRSVYDRAGLTPDQTAFVECHGTGTPAGDHRELQAVSESLCQQRSAESPIYVGSVKTNVGHLEGCAGVAGMIKSILSLEHGIIPQHLNFQAP…	gene_10830/MAHSEPDKMDPIAVVGMGCRFPGNATSPNNLWQMLVSGESAWSTFPEDRVNIASYFHPSGNRQGSICFSGAHFLQQDVAAFDASFFSIPTDEANATDPQQRMLLEVAVEALDSAGVDRDALRKSETGVWVGSFVKDYEQIALRDPDDSPKYGATGNGIAIMSNRISYFLDVNGPSMTIDTGCSASLVCLHNACQALRSGEIDMGLAGGAGLILTPNTMMPMTALNFLSPDGKCYTFDERANGYGRGEGIGIIVLKRLTDAVRDNDNIRGVIRGSRVNQDGRTSGITLPSAEAQIRNIRGVYERAGLTPEQTAFVECHGTGTPAGDHRELQAVSESLCQQRSTENPMYVGSVKTNVGHLEGCAGVAGMIKTILSLEHGIIPQHLNFQAP…	gene_05982/MAHSEPDKMEPIAVVGMGCRFPGNATSPNNLWQMLVSGESAWSTFPEDRVNIASYFHPSGNRQGSICFNGAHFLQQDVAAFDASFFSIPTDEANATDPQQRMLLEVAVEALDSAGVDRDALRKSETGVWVGSFVKDYEQIALRDPDDSPKYGATGNGIAIMSNRISYFLDVNGPSMTIDTGCSASLVCLHNACQALRSGEIDMGLVGGAGLILTPNTMMPMTALNFLSPDGKCYTFDERANGYGRGEGIGIIVVKRLSDAIRDNDNIRGVIRGSRVNQDGRTSGITLPSAEAQIRNIRSVYDRAGLTPDQTAFVECHGTGTPAGDHRELQAVSESLCQQRSAGSPIYVGSVKTNVGHLEGCAGVAGMIKSILSLEHGIIPQHLNFQAP…	gene_07730/MPHLEPDKMEPIAVIGMGCRFPGKATSPGHLWNMLKQGESAWSTFPADRVNIASYFHPSGNRQGSICFDGAHFIKQDVAAFDASFFSIPTDEANAIDPQQRMLLEVTVEALDSAGVDREALRKSETGVWVGSFVKDYEQIALRDPDDSPKYGATGNGIAIMSNRISYFLDVNGPSMTIDTGCSASLVCLHNACQALRSGEIDMGLAGGAGLILTPNTMMPMTALNFLSPDGKCYSFDERANGYGRGEGIGIIVVKRLADAIRDNDNIRAVIRGSRVNQDGRTSGITLPSAEAQIRNMRGVYERAGLTPEQTAFVECHGTGTPAGDHRELQAVSEALCQQRSTENPIYVGSVKTNIGHLEGCAGVAGVIKSIFTIEHGIIPKHLNFQAP…	gene_00798/MANPEPDKMEPIAVVGMGCRFPGNATSPNNLWQMLLGGESAWSTFPEDRVNIASYFHPSGNRQGSICFEGAHFLQQDVAAFDASFFSIPTDEANAIDPQQRMLLEVAVEALDSAGVDREALRKSETGVWVGSFVKDYEQIALRDPDDSPKYGATGNGIAIMSNRISYFLDVNGPSMTIDTGCSASLVCLHNACQGLRSGEIDMGLAGGAGLILTPNTMMPMTALNFLSPDGKCYTFDERANGYGRGEGIGIIVLKRLADAIRDNDNIRAVIRGSRVNQDGRTSGITLPSAEAQIRNIRGVYERAGLAPEKTAFVECHGTGTPAGDHRELQAVSEALCQQRSTDDPIYVGSVKTNIGHLEGCAGIAGVIKCIFSIEHGIIPQHLNFKAP…	gene_14366/MAHPEPDKMEPIAVVGMGCRFPGDATSPDNLWNMLKQGESAWSTFPADRVNIASYFHPSGNRQGSICFKGAHFLKQDVGAFDASFFSIPTDEANAIDPQQRMLLEVSVEALDSAGVDREALRKSETGVWVGSFVKDYEQIALRDPDDSPKYGATGNGIAIMSNRISYFLDVNGPSMTIDTGCSASLVCLHNACQALRSREIDMGLAGGAGLILTPNTMMPMTALNFLSPDGKCYTFDERANGYGRGEGIGIIVVKRLTDAIRDNDNIRAVIRGSRVNQDGRTSEAQVRNIRGVYERAGLSPEQTAFVECHGTGTPAGDHRELQAVSEVLCQQRSTENPIYVGSIKTNIGHLEGCAGVAGVIKSIFTLEHGIIPKHLNFQAPGSHRINW…	gene_05565/MAHPEPDKMEPVAVVGMGCRFPGNATSPNNLWQMLVSGESAWSTFPEDRVNIASYFHPSGNRQGSICFSGAHFLQQDVAAFDASFFSIPTDEANATDPQQRMLLEVAVEALDSAGVDRDALRKSETGVWVGSFVKDYEQIALRDPDDSPKYGATGNGIAIMSNRISYFLDVNGPSMTIDTGCSASLVCLHNACQALRSGEIDMGLAGGAGLILTPNTMMPMTALNFLSPDGKCYTFDERANGYGRGEGIGIIVLKRLTDAVRDNDNIRGVIRGSRVNQDGRTSGITLPSAEAQIRNIRGVYERAGLTPEQTAFVECHGTGTPAGDHRELQAVSESLCQQRSTENPMYVGSVKTNVGHLEGCAGVAGMIKTILSLEHGIIPQHLNFQAP…	gene_02816/MAHPEPDKMEPVAVVGMGCRFPGNATSPNNLWQMLVSGESAWSTFPEDRVNIASYFHPSGNRQGSICFSGAHFLQQDVAAFDASFFSIPTDEANATDPQQRMLLEVAVEALDSAGVDRDALRKSETGVWVGSFVKDYEQIALRDPDDSPKYGATGNGIAIMSNRISYFLDVNGPSMTIDTGCSASLVCLHNACQALRSGEIDMMGSAILFDERANGYGRGEGIGIIVLKRLTDAVRDNDNIRGVIRGSRVNQDGRTSGITLPSAEAQIRNIRGVYERAGLTPEQTAFVECHGTGTPAGDHRELQAVSESLCQQRSTENPMYVGSVKTNVGHLEGCAGVAGMIKTILSLEHGIIPQHLNFQAPGSHRINFTEWKVKVAQENTKWPVEGL…	gene_14150/MAHPEPDRMEPIAVVGMGCRFPGNATSPSNLWTMLVQGESAWSTFPEDRVNIASYFHPSGNRQGSICFNGAHFLKQDVSAFDASFFSIPTDEANAIDPQQRMLLEVAVEALDAAGVDREALRKSETGVWVGSFVKDYEQIALRDPDDSPKYGATGNGIAIMSNRISYFLDVNGPSMTIDTGCSASLVCLHNACQALRSGEIDMGLAGGAGLILTPNTMMPMTALNFLSPDGKCYTFDERANGYGRGEGIGIIVLKRLTDAIRHNDNIRGVIRGSRVNQDGRTSGITLPSAEAQIRNIRAVYERAGLTPDQTAFVECHGTGTPAGDHRELQAVSEALCQQRPTDDPMYVGSIKTNLGHLEGCAGIAGVIKSILTIEHGIIPKHLNFEAP…
PKS8	gene_05180/MGHLEGASGMIGMVKAIYQVKHGLVLPTAGFESINPKIQDKEKIIVPRTQIPWPQGEIRRILVTNFGFGGSNAAVIIDGPPPKAAPLDTNGYSSNGNITCSIGDYGNYVFIDGLEAAPKRAFVFSAKSERSLGTYLKSFEEYLSKISEADDFLINLSYTLGQRRTHFPHRVSVVADSITRLTQCLSVAKPSRARERILAFAFTGQGAQYAGMSVGIAHYKTFTKAIKLAEEHFSEFGATWSLSKELARPEFESRLNDAEISQPACTAVQLALVKLFDSWGVKPAVVTGHSSGEIAAAFTAGLLSFKTACAVSYFRGQAAARLSSRQAEKGAMLALGIDVKEASELIHQHTGGAYAIIAAINSPKSVTISGDVSAIDNIQKGAGEKGLF…	gene_07372/MVKAIFQVKHGVVLPTAGFESINPKIQDKEKIVVPQSQVPWPQGEIRRILVTNFGFGGSNAAVIIDGPPPKAALIKTNGYSNGNCIHSNGVNGNHALIGNFEPSAKRAFVFSAKSEKSLSAYLTSFAEYLRKAPKTNKFLMNLSYTLGQRRTHFPHRVSVVADSTTSLMEKLSAVKPSRARERIVAFAFTGQGAQYAKMSAGLASYESFAKAIELAGAHFSEFGATWSLSEELAKPESESRLNDAEISQPACTAVQLALVRLLESWGVRPAIVTGHSSGEIAAAFTAGLVSFKAACAVSFFRGQAASRLSSKHGGKGAMIALGIDFDEASELIKQHSGGAYATVAAINSPKSVTISGDVSAIENIQNGAGEKGMFSRRLKVEVAYHSG…	gene_05370/MSQDPPIAVIGFAYRVPGVGGKGLWDYLAQAKSAWSKIPADRFDQAAYCRPGPEKSGVFRVQGGHFVPGDIYAFDAAFFNMRTEEAKNADPQQRMLLEVALESAEMAGHSLNSLAGQKIGVFIGSGQHDYSACLTDDNFAVKTFTATGIAPCMLANRLSYFFDIDGPSTVLDSACASSAYAVHQGILAIRNGDCTAAFAAAASLNISPGGFLALEKTGALSGDGRSYSYDSKASGFGRGEGGACLFLKTLDDAIRDGDPIQAVIRSSACNHGGRSDGITMPNGMAHRKLLRRVHEAANLDPSDTAVIEGHGTGTAVSDPIEAGAFTSVLACNRNASNPIYIGSIKSNMGHLEGASGMIGMVKAIYQVKHGVVLPTAGFESINPKIQDK…	gene_11543/MRAEEAKNADPQQRMLLEVALESAEMAGHSLKSLAGQKIGVFIGSGQHDYSACLTDDNFAVKTFTATGIAPCMLANRLSYFFDIDGPSTVLDSACASSAYAVHQGILAIRNGDCTAAFAAAASLNISPGGFLALEKTGALSGDGRSYSYDSKASGFGRGEGGACLFLKTLDDAIRDGDPIQAVIRSSACNHGGRSDGITMPNGMAHRKLLRRVHEAANLDPSDTAVIEGHGTGTAVGDPIEAGAFTSVLACNRNASNPIYIGSIKSNMGHLEGASGMIGMVKAIYQVKHGVVLPTAGFESINPKIQDKEKIIVPQTQIPWPQGEIRRILVTNFGFGGSNAAVIIDGPPLKATSIETNGHSSNGNSICSNGVDGNYVFVDGLESAPKRA…	gene_11809/MSQDPPIAVIGFAYRAPGVGGKGLWDYLAQAKSAWSKIPADRFDQAAALSGDGRSYSYDSKASGFGRGEGGACLFLKTLDDAIRDGDPIQAVIRSSACNHGGRSDGITMPNGIAHRKLLRRVHEAANLDPSDTAVIEGHGTGTAVGDPIEAGAFTSVLACNRNASNPIYIGSIKSNMGHLEGASGMIGMVKAIYQVKHGVVLPTAGFESINPKIQDKEKIIVPQTQIPWPQGEIRRILVTNFGFGGSNAAVIIDGPPLKATSIETNGHSSNGNSICSNGVDGNYVFVDGLESAPKRAFVFSAKSEKSLGTYLKSFEEYLLKLPEADDFLKNLSYTLGQRRTHFPHRVSVVADSITSLTQGLSASKPSRARERILAFAFTGQGAQYAGM…	gene_09813/MSQDPPIAVIGFAYRAPGVGEKGLWDYLAQAKSAWSKIPADRFDQAAYCRPGPEKSGVFRAQGGHFVPGDIYAFDAAFFNMRAEEAKNADPQQRMLLEVALESAEMAGHSLNSLAGQKIGVFIGSGQHDYSACLTDDNFAVKTFTATGIAPCMLANRLSYFFDIDGPSTVLDSACASSAYAVHQGILAIRNGDCTAAFAAAASLNISPGGFLALEKTGSYSYDSKASGFGRGEGGACLFLKTLDDAIRDGDPIQAVIRSSACNHGGRSDGITMPNGMAHRKLLRRVHEAANLDPSDTAVIEGHGTGTAVGDPIEAGAFTSVLACNRNASNPIYIGSIKSNMGHLEGASGMIGMVKAIYQVKHGVVLPTAGFESINPKIQDKEKIIVPQ…	gene_09903/MPNGMAHRKLLRRVHEAANLDPSDTAVIEGHGTGTAVGDPIEAGAFTSVLACNRNASNPIYIGSIKSNMGHLEGASGMMGMVKAIYQVKHGVVLPTAGFESINPKIQDKEKIIVPQTQIPWPQGEIRRILVTNFGFGGSNAAVIIDGPPLKATLIETNGHSSNGNSICSNGVDGNYVFVDGLESAPKRAFVFSAKSEKSLGTYLKSFEEYLLKLPEADDFLKNLSYTLGQRRTHFPHRVSVVADSITSLTQGLSASKPSRARERILAFAFTGQGAQYAGMSAGTAHYKTFTKAIELAETHFTEFGATWSLSKELTRPESESRVNDAEISQPACTAVQLALVRLFDSWGVKPAVVTGHSSGEIAAAFVAGLVSFKTACAVSYFRGQAAA…	gene_05578/MPDSPIAVVGFAYRAPGVGGKGLWDYLAQARSAWSKIPADRFDQDAYCRPGAEKSGVFRVEGGHFVPEDIYAFDAAFFNMRAEEAKNADPQQRMLLEVALEAAEMAGHSLNSLAGQKIGVFIGSGQHDYSGCLTDDTFGVKTFTATGIAPCMLANRLSYFFDIDGPSTVLDSACASSAYAVHQAVLAIRNGDCSAAFAASASLNISPGGFLALEKTGPGLGSALSADDKSYSYDSKASGFGRGEGGACLLLKCLDDAVRDGDPIQALIRGSACNHGGRSDGITMPNGAAHRKLLRRVHEVAGLDPSETAVVEGHGTGTAVGDPIEAGAFTSVLTKSRTASNPIYIGSVKSNLGHLEGASGMIGMIKAILQVKHGIVLPTAGFESINPK…	gene_08206/MANDSPIAVVGFAYRAPGVGGKGLWDYLAQARSAWSKVPADRFDQDAYCKPGAEKSGVFRVEGGHFVPEDIYAFDAAFFNMRAEEAKNADPQQRMLLEVALEAAEMAGHSLNSLAGQKIGVFIGSGQHDYSGCLTDDTFGVKTFTATGIAPCMLANRLSYFFDIDGPSTVLDSACASSAYAVHQAVLAIRNGDCNAAFAASASLNISPGGFLALEKTGQVDVTLSSGFGRGEGGACLLLKCLDDAVRDGDPIQAVIRGSACNHGGRSDGITMPNGVAHRKLLRRVHEVAGLDPSKTAVVEGHGTGTAVGDPIEAGAFTSVLAKSRTASNPIYIGSVKSNLGHLEGASGMIGMIKAILQVKNGIVLPTAGFESINPKIQDKEKIVVPQV…	gene_04024/MSQDAPIAVIGFAYRAPGVGGKGLWDYLAQAKSAWSKIPADRFDQDAYCRPGPEKSGIFRVQGGHFVPGDIYAFDAAFFNMRAEEAKNADPQQRMLLEVALESAEMAGHSLNSLAGQTVGVFIGSGQHDYSACLTDDNFAVKTFTATGIAPCMLANRLSYFFDIDGPSTVLDSACASSAYAVYQGILAIRNGDCKAAFAASASLNISPGGFLALEKTGALSDNGRSYSYDSKASGFGRGEGGACLFLKALDEAIKDGDPIQAVIRSSACNHGGRSDGITMPNGVAHRQLLRRVHEAAGLDPSETAVIEANVETSDSDPIEAGAFTSVLAQNRNASNPIYVGSIKSNMGHLEGASGMIGMVKAIFQLKHGVVLPTAGFESINPKIQDKE…	gene_08866/MSQDAPIAVIGFAYRAPGVGGKGLWDYLAQAKSAWSKIPADRFDQDAYCRPGPEKSGIFRVQGGHFVPGDIYAFDAAFFNMRAEEAKNADPQQRMLLEVALESAEMAGHSLNSLAGQTVGVFIGSGQHDYSACLTDDNFAVKTFTATGIAPCMLANRLSYFFDIDGPSTVLDSACASSAYAVHQGILAIRNGDCKAAFAASASLNISPGGFLALEKTGALSDNGRSYSYDSKASGFGRGEGGACLFLKALDEAIKDGDPIQAVIRSSACNHGGRSDGITMPNGVAHRQLLRRVHEAAGLDPSETAVIEANVETSDSDPIEAGAFTSVLAQNRNASNPIYVGSIKSNMGHLEGASGMIGMVKAIFQLKHGVVLPTAGFESINPKIQDKE…	gene_04316/MSQDAPIAVVGFAYRAPGVGGKGLWDYLAQARSAWSKIPPDRFDQDAYCRPGPEKSGVFRVQGGHFVPGDIYAFDAAFFNMRAEEAKNADPQQRMLLEIALEAAEMAGHSLNSIAGQNIGVFIGSGQHEYSGCLTDDHFGVKTFTATGIAPCMLANRLSYFFDIDGPSTVLDSACASSAYAVHQGILAIRNGDCKAAFAAAASLNIGPGGFLALEKTGALSDDGRSYSYDSKASGFGRGEGGACLLLKAMDEAIRDGDPIQAIIRSSACNHGGRSDGITMPNGIAHRELLRRVHEMAGLDPSDTAVVEGHGTGTAVGDPIEAGAFTSVLAKHRTASNPIYIGSIKSNMGHLEGASGMIGMVKAILQVKHGVVLPTAGFECINLKIQDK…	gene_05357/MSQDAPIAVVGFAYRAPGVGGKGLWDYLAQARSAWSKIPPDRFDQDAYCRPGPEKSGVFRVQGGHFVPGDIYAFDAAFFNMRAEEAKNADPQQRMLLEIALEAAEMAGHSLNSIAGQNIGVFIGSGQHEYSGCLTDDHFGVKTFTATGIAPCMLANRLSYFFDIDGPSTVLDSACASSAYAVHQGILAIRNGDCKAAFAAAASLNIGPGGFLALEKTGALSDDGRSYSYDSKASGFGRGEGGACLLLKAMDEAIRDGDPIQAIIRSSACNHGGRSDGITMPNGIAHRELLRRVHEMAGLDPSDTAVVEAGAFTSVLAKHRTASNPIYIGSIKSNMGHLEGASGMIGMVKAILQVKHGVVLPTAGFECINLKIQDKEKIIVPKTQIQWP…	gene_08866/MPQDAPIAVIGFAYRAPGVGGKGLWDYLAQAKSAWSKIPPDRFDQDAYCRPGPEKSGIFRVQGGHFVPGDIYAFDAAFFNMRAEEAKNADPQQRMLLEVALEAAEMAGHSLNSLAGQKIGVFIGSGQHEYSGCLTEDTFGVQTFTATGIAPCMLANRLSYFFDIDGPSTVLDSACASSAYAVHQGVLAIRNGDCKAAFAAAASLNISPGGFLALEKTGALSGDGRSYSYDSKASGFGRGEGGACLLLKAMDEAIRDGDPIQAIIRSSACNHGGRSDGITMPNGIAHRKLLRRVHEVAGLDPSDTAVVERNTYSDPIEAGAFTSVLAEHRTASNPIYIGSIKSNMGHLEGASGMIGMVKAILQVKHGVVFPTAGFESINPKIQDKEKIV…	gene_02405/MPQDAPIAVVGFAYRAPGVGGKGLWDYLAQARSAWSKVPPDRFDQDAYCRPGPEKSGVFRVQGGHFVPGDIYAFDAAFFNMRAEEAKNADPQQRMLLEIALEAAEMAGHSLNSLAGQKIGVFIGSGQHEYSGCLTDDHFGVKTFTATGIAPCMLANRLSYFFDIDGPSTVLDSACASSAYAVHQGILAIRNGDCKAAFAAAASLNIGPGGFLALEKTGALSDDGRSYSYDSKASGFGRGEGGACLLLKAMDEAIRDGDPIQAIIRSSACNHGGRSDGITMPNGIAHRELLRRVHEMAGLDPSDTAVVEGHGTGTAVGDPIEAGAFTSVLAKHRTASNPIYIGSIKSNMGHLEGASGMIGMVKAILQVKHGVVLPTAGFESINPKIQDK…	gene_12986/MPHDDPVAVIGFAYRAPGVGRKGLLDYLTQARTAWSKIPADRFDQDAYCRPGAEKAGVFSVQGGHFVPGDIYAFDAAFFNMRAKEAKNADPQQRMLLEVALEAAEMAGHSLNSLAGQQIGVFIGSGQHDYSGCLTDDIFGVKTFTATGLAPCMLANRLSYFFDIDGPSTVLDSACASSAYAVHQGVLAIRNGDCKAAFVAAASLNISPGGFLALEKTGALSNDGRSYSYDSKASGFGRGEGGACLLLKSMDDAIRDGDPIQAVIRSSACNHGGRSEGITMPNGVAHRKLLWRVHDVAGLDPSETAVIEASAFTSVLAKNRAASNPIYIGSIKSNMGHLEGASGMIGMVKAILQVKHGIVFPTAGFESINPKIQDKEKIIVPKAQIPWP…	gene_05239/MPNDAPIAVIGLAYRAPGVGGKGIWDYLTKARSAWSEIPADRFDQAAYCKPGAERSGVFRVKGAHFVPGDIYAFDAAFFNMRAEEAKNADPQQRMLLECALEAAEMAGHSLNSLAGQKIGVFIGSGQHDYSGCLTDDNFAVKTFTATGIAPCMLANRLSYFFDIDGPSTVLDSACASSAYAVHQGVLAIRNGDCNAAFAAAASLNISPGGFLALEKTGALSDDGRSYSYDSKASGFGRGEGGACLLLKAMDDAIRDGDPIQAIIRSSACNHGGRSDGITMPNGAAHRKLLWRVHEAAGLDPSETAVVEGHGTGTAVGDTIEAGAFTSVLARNRKASNPIYIGSVKSNMGHLEGASGMLGMVKAILQVKHGIVLPTAGFESINPKIQDR…	gene_03210/MPNDAPIAVVGFAYRAPGVGGKGLLDYLAQAKSAWSKIPADRFDQDAYCRPGTEKSGVFRVEGGHFVPGDIYAFDAAFFNMRAEEAKNSDPQQRMLLEVALEAAEMAGHSLNSLSGQKIGVFIGSGQHDYSGCLTDDTFGIKTFTATGIAPCMLANRLSYFFDIDGPSTVLDSACASSAYAVHQAVLAIRNGDCNAAFAASASLNISPGGFLALEKTGALSNDGRSYSYDCKASGFGRGEGGACLLLKCLDDAISDGDPIQAVIRSSACNHGGRSDGITMPNGVAHRKLLQRVHEVAGLDPSETAVVEGHGTGTAVGDPIEAGAFTSVLAKNRAASDPIYIGSIKSNMGHLEGASGMIGMVKAILQVKHGIVLPTAGFDSINPKIQDK…	gene_10091/MPQDAPIAVIGFAYRAPGVGGKGLWDYLAQARSAWSKIPPDRFDQDAYCRTGPEKSGIFRVQGGHFVPGDIYAFDAAFFNMRAEEAKNADPQQRMLLEVALEAAEMAGHSLNSLAGQKIGVFIGSGQHEYSGCLTEDTFGVKTFTATGIAPCMLANRLSYFFDIDGPSTVLDSACASSAYAVHQGVLAIRNGDCKAAFAAAASLNISPGGFLALEKTGALSGDGRSYSYDSKASGFGRGEGGACLLLKAMDEAIRDGDPIQAIIRSSACNHGGRSDGITMPNGIAHRKLLRRVHEVAGLDPSGTAVVEGHGTGTAVGDPIEAGAFTSVLAEHRTASNPIYIGSIKSNMGHLEGASGMIGMVKAILQVKHGVVFPTAGFESINPKIQDK…	gene_13322/MPQDAPIAVIGFAYRAPGVGGKGLWDYLAQARSAWSKIPPDRFDQDAYCRTGPEKSGIFRVQGGHFVPGDIYAFDAAFFNMRAEEAKNADPQQRMLLEVALEAAEMAGHSLNSLAGQKIGVFIGSGQHEYSGCLTEDTFGVKTFTATGIAPCMLANRLSYFFDIDGPSTVLDSACASSAYAVHQGVLAIRNGDCKAAFAAAASLNISPGGFLALEKTGALSGDGRSYSYDSKASGFGRGEGGACLLLKAMDEAIRDGDPIQAIIRSSACNHGGRSDGITMPNGIAHRKLLRRVHEVAGLDPSGTAVVERNAYSDPIEAGAFTSVLAEHRTASNPIYIGSIKSNMGHLEGASGMIGMVKAILQVKHGVVFPTAGFESINPKIQDKEKIV…	gene_06807/MVGAIKPYYNEDGLDSPTNETDRPIFVSSVTGQIQDTATVGAEYWIQNLVRPVRFSDAIQSIVQPRGNDSLDKNSISANVIIEIGPHSALKSPIKQTIELAQTPRTGGQHASRITYLPSLVRDTDGYEALLNMASSLFALGASIQLGEVNQTNMGNADVVDDLPAYAWDKSTSYKIETRCNNEKLFPGEPYNTLIGRPMPSNGGKERAYRQVFTLDEVPWIRDHAVAGAVVFPMTGYIACAIEAARKTSSVPAAAFVVRDFYIKERMEIQEEQAIDMVTKIRPASTGAANISQTAWDFEISSWDHASGWTIHAHGSVQPEMASMKADTIGLQASLSLVDTTGELIEHDLANYYQEASVRATRFGPSFQNSVRFFEGKGYTVLEHKLRS…
PKS9	gene_08831/MRSKADSSSSTMTKMTWAKVLYFSGEIPQGDPEGDQRVLFRKLHQLSKERDHVVLASFLESVTLAVKDECSRLSRPQRDLVPAFESVLDLTDYVVKLRKTPIGGAIERVLVLVFQVGSLLAYHEAHPLEYNFTSTNTTLIGRGSGLLSAAAIGLSPSFSMIPGIAQEITRVSFRFGIVVDQVCRSLEVSQDEINADGAWVYCVHGVDEYHAREVVNQFNNEKAYPATNVANVFNVDNAGGSVSIGGPPKTLKALFSESEGFKKTKNVAMKKIQGMWHTDKVYGTEHVGPVIPKVESTRELFLPLISPVSGEPFRETEAGPLLEQIMEEILTERVRWDLIIDTVTQQLKQWSPRSAQLVSIQPSHYNHNLVESWRGELPHAAVSDLAIL…	gene_12152/MSSAKVLYFSGEIPQGDPEGDQRVLFRKLHLLSKERDHVVLASFLESVTAAVKDEFSRLSRPQRDLVPAFESVLDLTDHVVKLRKTPIGGAIERVLVLVFQVGSFLAYHEAHPLEYNFTPNTTILIGRGSGLLSAAAIGLSPSFSMIPGIAQEITRVSFRFGLVVDQVCRSLEVSQDEINADGAWVYCVHGVDEDHARESVQKFNDEKAYPATNVANVFNVDNAGGSVSIGGPPKTLKALFAESEGFKKTKNVAMKKIQGMWHTDKVYGTEHVGPVIPKIESTRELFLPLISPVSGESFRETEAGPLLEQIMEEILTERVRWDLIIDTVTKQLKQMSPRSAQLVSIQPSHYNHNLVESWRGELPNAAVSDLAILPAVLDLAIGTSPPK…	gene_01455/MRSRADNNSDNMIKMTSAKVLYFSGEIPQGDPEGDQRVLFRKLHQLSKERDHVVLASFLESVTVAVKDECSRLSRPQRDLVPAFESVLVGSFLAYHEAHPLEYNFTPTNTTLIGRGSGLLSAAAIGLSPSFSMIPGIAQEITRMSFRFGIVVDQVCRSLEVSKDEINADGAWVYCVHGVDEDHARESVKQFNDEKAYPATNVANVFNVDNAGGSVSIGGPPKTLKALFSESEGFKKTKNVAMKKIQGMWHTDKVYGTEHVGPIIPKIESTRELFLPLISPVSGEPFRETEAGPLLEQIMEEILTERVRWDLIIDTVTQQLKQQSPRSAQLVSIQPSHYNHNLVESWRGELPNAAVSDLAILPAVLDLALGTSPPKDTRSSKIAVVGMA…	gene_14123/MRSRADNSSNNMIKMTSAKVLYFSGEIPQGDPGGDQRVLFRKLHQLSKERDHVVLASFLESVTVAVKDECSRLSRPQRDLVPAFESVLDLTDHVVKLRKTPIGGGHRAGVGPGVPKIVIVRGLTNAPFARYHEAHPLEYNFTPTNTTLIGRGSGLLSAAAIGLSPSFSMIPGIAQEITRVSFRFGIVVDQVCRSLEVSKDEINADGAWVYCVHGVDEDHARESVKQFNDEKAYPATNVANVFNVDNAGGSVSIGGPPKTLKALFSESEGFKKTKNVAMKKIQGMWHTDKVYGTEHVGPVIPKIESTRELFLPLISPVSGEPFRETEAGPLLEQIMEEILTERVRWDLIIDTVTQQLKQQSPRSAQLVSIQPSHYNHNLVESWRGELPN…	gene_09145/MRSRADNSSNNMIKMTSAKVLYFSGEIPQGDPEGDQRVLFRKLHQLSKERDHVVLASFLESVTVAVKDECSRLSRPQRDLVPAFESVLDLTDHVVKLRKTPIGGAIERVLVLVFQVGSFLAYHEAHPLEYNFTPTNTTLIGRGSGLLSAAAIGLSPELFDDPGHRSRNHPSVIPIWYSGRSNEDHARESVKQFNVEKAYPATNVANVFNVDNAGGSVSIGGPPKTLKALFSESEGFKKTKNVAMKKIQGMWHTDKVYGTEHVGPVIPKIESTRELFLPLISPVSGEPFRETEAGPLLEQIMEEILTERVRWDLIIDTVTQQLKQQSPRSAQLVSIQPSHYNHNLVESWRGELPNAAVSDLAILPAVLDLALGTSPPKDTRSSKIAVVG…	gene_15022/MRSRADNNSNNMIKMTSAKVLYFSGEIPQGDPEGDQRVLFRKLHQLSKERDHVVLASFLESVTVAVKDECSRLSRPQRDLGGAIERVLVLVFQVGSFLAYHEAHPLEYNFTPTNTTLIGRGSGLLSAAAIGLSPSFSMIPGIAQEITRVSFRFGIVVDQVCRSLEVSKDEINADGAWVYCVHGVDEDHARESVKQFNDEKAYPATNVANVFNVDNAGGSVSIGGPPKTLKALFLESEGFKKTKNVAMKKIQGMWHTDKVYGTEHVGPVIPKIESTRELFLPLISPVSGEPFRETEAGPLLEQIMEEILTERVRWDLIIDTVTQQLKQQSPRSAQLVSIQPSHYNHNLVESWRGELPNAAVSDLAILPAVLDLALGTSPPKDTRSSKIA…	gene_11988/MRSRADNSSNNMIKMTSAKVLYFSGEIPQGDPEGDQRVLFRKLHQLSKERDHVVLASFLESVTVAVKDECSRLSRPQRDLIPAFESVLDLTDHVVKLRKTPIGGPSSGCWSWCSKYHEAHPLEYNFTPTNTTLIGRGSGLLSAAAIGLSPSFSMIPGIAQEITRVSFRFGIVVDQVCRSLEVSKDEINADGAWVYCVHGVDEDHARESVKQFNDEKAYPATNVANVFNVDNAGGSVSIGGPPKTLKALFSESEGFKKTKNVAMKKIQGMWHTDKVYGTEHVGPIIPKIESTRELFLPLISPVSGEPFRETEAGPLLEQIMEEILTERVRWDLIIDTVTQQLKQQSPRSAQLVSIQPSHYNHNLVESWRGELPNAAVSDLAILPAVLDL…	gene_14986/MVAAKVLYFSGEIPQGDPEGDQRALFRKLHLLSKERDNVVLASFLHSVTLAVKDDVLDLTDHVVQLRKTPLGGAIERVLVLVFQLGSFIAYHEAHPLEYNFTPLNASLIERGSGLLSAAAIGLSPSISIIPGIAQDLARVSFRFGLVVDQVCRSLEVSKEEINADGAWVYCVHGVDENDAREYAEQFNEAKGYPPTNCASVFNVDNAGGSVSIGGPPKTLEALFSESDGFKKTKNVAMKKIQGMWHTDRVYGTEHVGPIIPEFDSARALHIPLISPVSGEPFQKTEVGPLLEQIMEEILTERVRWDLIIDTVFKQLKQMAPESAQLVSIQPSHYNHNLVERWRAELPDAAVSDFALMPAALDLPLGTSPPRDTKSSKIAVVGLACRFP…	gene_15273/MVSAKVLYFSGEIPQGDPEGDQRVLFRKLHLLSKERDNVVLASFLHSVTLAVKDECSRLSRPQRELIPPFESVLDLTDHVVQLRKTPLGGAIERVLVLVFQLGSFIAYHEAHPLEYNFTSLNTSLIGRGSGLFSAAAIGLSASISMIPSIAQDIARVSLRFGLVVDQVCRSLEVSKEEINADGAWVYCVHGVDENDACGYVEQFNEAKGYPPTNCASVFNVDNAGGSVSIGGPPKTLKALFSESDGFKKTKNVAMKKIQGMWHTDRVYGTEHVGPVIPEFNSAQELHMPLISPVSGEPFQETKAGPLLEQIMEEILTERVRWDLIINTVSKQLKQMAPESAQLISIQSSHYNHNLVERWRTELPNAAVSDLALMPAALDLPLGTSPPK…	gene_05724/MIKMTSAKVLYFSGEIPQGDPEGDQRVLFRKLHLLAKERDHVVLASFLESVTAAVKDECSRLSRAQRDLVPPFESVLDLTDHVVKLRKTPIGGAIERVLVLVFQVGSFLAYHEAHPLEYNFTPNTTTLIGRGSGLLSAAAIGLSPSFSMIPGIAQEITRVSFRFGLVVDQVCRSLEVSQDEINADGAWVYCVHGVDEDHARESVQKFNDEKEYPATNVASVFNVDNAGGSVSIGGPPETLKALFSESEGFKKTKNVAMKKIQGIGEPFRETEAGPLLEQIMEEILTERVRWDSIIDTVTKQLKQMSPRSAQLVSIQPSHYNHNLVESWRAELPNAAVSDLAILPAVLDLALGTNPPKDTRSSKIAVVGMACRFPGADSTDEFWERLMQ…	gene_03342/MTSAKVLYFSGEIPQGDPEGDQRVLFRKLHLLAKERDHVVLASFLESVTAAVKDESSRLSRAQRDLIPPFESVLDLTDHVVKLRKTPIGGAIERVLVLVFQVGSFLAYHEAHPLEYNFTPNTTTLIGRGSGLLSAAAIGLSPSFSMIPGIAQEITRVSFRFGLVVDQVCRSLEVSQDEINADGAWVYCVHGVDEDHARESVQKFNDEKEYPATNVASVFNVDNAGGSVSIGGPPKTLKALFSESEGFKKTKNVAMKKIQGMWHTDKVYGTEHVDPVIPKIESPRELFLPLISPVSGEPFRETEAGPLLEQIMEEILTERVRWDSIIDTVTKQLKQMSPRSAQLVSIQPSHYNHNLVESWRAELPNAAVSDLAILPAVLDLALGTSPPK…	gene_10235/MVSAKVLYFSGEIPQGDPEGDQRVLFRKLHLLSKERDNVVLASFLHSVTLAVKDECSRLSRPQRELIPPFESVLDLTDHVVQLRKTSLGGAIERVLVLVFQLGSFIAYHEAHPLEYNFTGANTSLIGRGSGLLSAAAVGLSPSISMIPSIAQDIARVSFRFGLVVDQVCRSLEVSKEEINADGAWVYCVHGVDEDDAREYVQQFNEEKGYPPTNGATVFNVDNAGGSVSIGGPPKTLKALFSESDGFKKTKNVAMKKIQGMWHTDRVYGTEHVGPVIPEFDSKRELHMPLISPVSGEPFRETEAGPLLEQIMQEILTERVRWDLIIDTVSRQLKHMMPESAQLVSIQPSHYNHNLVERWRAELPHAAVSDLALMPAALDLPLGTSPPK…	gene_08650/MVSAKVLYFSGEIPQGDPEGDQRVLFRKLHLLSKERDNVVLASFLHSVTLAVKDECSRLSRPQRELIPPFESVLDLTDHVVQLRKTSLGGAIERVLVLVFQLGSFIAYHEAHPLEYNFTGANTSLIGRGSGLLSAAAVGLSPSISMIPSIAQDIARVSFRFGLVVDQVCRSLEVSKEEINADGAWVYCVHGVDEDDAREYVQQFNEEKVGADIAIPVVNYLAMYQSLTDLLRIPSNKRRDGIQRRQRGGSVSIGGPPKTLKALFSESDGFKKTKNVAMKKIQGMWHTDRVYGTEHVGPVIPEFDSKRELHMPLISPVSGEPFRETEAGPLLEQIMQEILTERVRWDLIIDTVSRQLKHMMPESAQLVSIQPSHYNHNLVERWRAELPH…	gene_14346/MVSAKVLYFSGEIPQGDPEGDQRVLFRKLHLLGKERDNVVLGSFLHSITLAVKDECSRLARPQRELIPPFESVLDLTDHVVQLRKTPLGGAIERVLVLVFQVGSFIADKADPYSAQSYHEANPLEYNFTEANAILIGRGSGLLSAAAVGLSPSISMIPSIAQDIARVSFRFGLVVDQVCRSLEVSKEEINADGAWVYCVHGVDEDDAREYVDQFNQEKGYPPTNCATVFNVDNAGASVSIGGPPKTLKALFAESDGFKKTKNVAMKKIQGMWHTDRVYGTEHVGPVIPEFDAKRSLHMPLISPVSGEPFRETRAGALLERIMEEILTERVRWDLIIDTVSRQLKHMQPESAQLVSIQPSHYNHNLVERWRAELPHATVSDIAMLPAAL…	gene_11432/MVSAKVLYFSGEIPQGDPEGDQRVLFRKLHLLSKERDNVVLASFLHSVTLAVKDECSRLSRPQRELIPPFESVLDLTDHVVQLRKTSLGGAIERVLVLVFQLGSFIAYHEAHPLEYNFTGANTSLIGRGSGLLSAAAVGLSPSISMIPSIAQDIARVSFRFGLVVDQVCRSLEVSKEEINADGAWVYCVHGVDEDDAREYVQQFNEEKGYPPTSGATVFNVDNAGGSVSIGGPPKTLKALFSESDGFKKTKNVAMKKIQGMWHTDRVYGTEHVGPVIPEFDSKRALHMPLISPVSGEPFRETQAGPLLEQIMQEILTERVRWDLIIDTVSRQLKHMMPESAQLVSIQPSHYNHNLVERWRAELPHAAVSDLALMPAALDLPLGTSPPK…	gene_03638/MALLERAWCRVISVSFSTSKQTRERKSKTRQDGFSQSLVFFGRDPQGDPEGDQRALFRKLNLLSKERDHVVLASFLQSVTVAVKEECNRLSRPQRDLVPPFESVLDLTDHVVQLRKTPLGGAIERVLVLVFQVGSFIAYHGAHPLEYNFIPTSTFLIGRGSGLLSAAAIGLSPNISMIPGIAQDIARVSFRFGLAVDQVCRSLEVSQEEINADGAWVYCVHGVDENVAREYVQQFNEDKGYPPTNGATVFNVDNAGGSVSIGGPPKTLKALFSESDGFKKTKNVAMKKIQGMWHTDRVYGTEHVGPVIPKMDSTRELYLPLISPVSGEPFQETEAGPLLEQIMEEILTERVRWDLIIDTVSGQLKQLQPRSAQLVSIQPSHYNHNLVD…		gene_12894/MVSAKVLYFSGEIPQGDPEGDQRVLFRKLHLLSKERDNVVLASFLHSVTLAVKDECSRLSRPQRELSVLDLTDHVVQLRKTPLGGAIERVLVLVFQLGSFIAYHEAHPLEYNFTPMNTSLIGRGSGLLSAAAIGLSPSISMIPSIAQDIARVSFRFGLVSVGRWRSPKGEINADGAWVYCVHGVDENDAREYVERFNEAKGYPPTNCASVFNVDNAGGSVSIGGPPKTLKALFSESDGFKKTKNVAMKKIQGMWHTDRVYGTEHVGPVIPEFDSTRELHMPLISPVSGEPFQETAAGPLLEQIMEEILTERVRWDLIIDSVSRQLKQIKPDSAQLVSIQPSHYNHNLVERWRAELPNATVSDLALMPAALDLPLGTSPPKDTKSSKIA…	gene_11714/MVSAKVLYFSGEIPQGDPEGDQRVLFRKLHLLGKERDNVVLGSFLHSITLAVKDECSRLSRPQRELIPPFESVLDLTDHVVQLRKTPLGGAIERVLVLVFQVGSFIAYHEAHPLEYNFTEANAILIGRGSGLLSAAAVGLSPSISMIPSIAQNIARVSFRFGLVVDQVCRSLEVSKEEINADGAWVYCVYGVDEDDAREYVDQFNQEKGYPPTNCATVFNVDNAGASVSIGGPPKTLKALFAESDGFQKTKNVAMKKIQGMWHTDRVYGTEHVGPVIPEFDAKRSLHMPLISPVSGEPFRETSAGALLERIMEEILTERVRWDLIIDTVSRQLKHMQPESAQLVSIQPSHYNHNLVERWRAELPHAAVSDIAMLPAALDLPLGTSPPK…	gene_12287/MVSAKVLYFSGEIPQGDPEGDQRVLFRKLHLLGKERDNVVLGSFLHSITLAVKDECSRLSRPQRELIPPFESVLDLTDHVVQLRKTPLGEPSSGYWFSFSKWEASLLERKLTEIPLSYHEAHPLEYNFTEANAILIGRGSGLLSAAAVGLSPSISMIPSIAQNIARVSFRFGLVVDQVCRSLEVSKEEINADGAWVYCVHGVDEDDAREYVDQFNQEKGYPPTNCATVFNVDNAGASVSIGGPPKTLKALFAESDGFQKTKNVAMKKIQGMWHTDRVYGTEHVGPVIPEFDAKRSLHMPLISPVSGEPFRETSAGALLERIMEEILTERVRWDLIIDTVSRQLKRMQPGSAQLVSIQPSHYNHNLVERWRAELPHAAVSDIAMLPAAL…	gene_15262/MRSRADNNSDNMIKMTSAKVLYFSGEIPQGDPEGDQRVLFRKLHQLSKERDHVVLASFLESVTVAVKDECSRLSRPQRDLIPAFESVLDLTDHVVKLRKTPIGGAIERVLVLVFQVGSFLAYHEAHPLEYNFTPTNTTLIGRGSGLLSAAAIGLSPSFSMIPGIAQEITRVSFRFGIVVDQVCRSLEVSKDEINADGAWVYCVHGVDEDHARESVKQFNDEKAYPATNVANVFNVDNAGGSVSIGGPPKTLKALFSESEGFKKTKNVAMKKIQGMWHTDKVYGTEHVGPVIPKIESTRELFLPLISPVSGEPFRETEAGPLLEQIMEEILTERVRWDLIIDTVTQQLKQQSPRSAQLVSIQPSHYNHNLVESWRGELPNAAVSDLAIL…
PKS10	gene_12693/MESMQELEGQHEPVSIVGMGCRWAGGVSSPAGLWELLRNNKDGWRKFDEPRFSSEAYHHPNQNRPGSTRTEGGYLVEEDARLFDNAFFGITDAEVETMDPSQRKLLEVVYEAFENGGETWESISNSRTGVYIGNISLDHILIQARDWESPKSHAATGADTSVLANRISYIFNLHGPSLAMNTACSSSMYALHMAVSAIRNGDCDGAIVAAANWITDPSMQFVLDKLGALSPTSRCHTFDASADGYARGEGYAALYLKKSSIAVLEKMPIRAMIRGTAINANGRTGGITSPNMGGQEDVIRKAYENAGNLPFSDTAFFECHGTGNQAGDPVEIEAIGNVFASSRSKARKDRLLIGSVKPSLGHTEGASAIASIMKVVLSLEAGEVPPTF…	gene_09875/MESMQELEGQHEPVSIVGMGCRWAGGVSSPTALWELLRNNKDGWRKFEEPRFSAEGFHHPNQDRPGSLRTEGGFLVEEDARLFDNAFFGIAAREVETMDPSQRKLLEVVYEAFENGGETWESISNSRTGVYIGNNSLDHTLIQARDWESPKSYAATGADTSLLANRISYIFNLHGPSLAMNTACSSSMYALHMAVSAIRNGDCDGAIVAAANWITDPSMQSVLDKLGALSPTSRCHTFDASADGYARGEGFAALYLKKSSIAVLEKMPIRAMIRGTAINANGRTGGITRSNTEGQEDVIRRAYENSGNLPFSDTAFFECHGTGTQASDPIEVEAIGNVFASSRSKARKDRLLIGSVKPSLGHTEGASAIASIMKVVLSLEAGEVPPTF…	gene_11037/MESMQELEGQHEPVSIVGMGCRWAGGVSSPTGLWELLRNNKDGWRKFDEPRFSSEAYHHPNQNRPGSTRTEGGFLVEEDARLFDNAFFGITDDEVETMDPSQRKLLEVVYEAFENGGETWESIANSRTGVYIGNISLDHILIQARDWESPKSHAAIGADTSVLANRISYIFNLHGPSLAMNTACSSSMYALHMAVSAIRNGDCDGAIVAAANWITDPSMQFVLDKLGALSPTSRCHTFDASADGYARGEGFAALYLKKSSIAVLEKMPIRAMIRGTAINANGRTGGITHPNTGGQEDVIRKAYENAGNLPFSDTAFFECHGTGTQAGDPIEVEAIGNVFAPSRSKARKDRLLIGSVKPSLGHTEGASAIASIMKVVLSLEAGEVPPTF…	gene_16391/MESMQELEGQHEPVSIVGMGCRWAGGVSSPTGLWELLRNNKDGWRKFDEPRFSSEAYHHPNQNRPGSTRTEGGFLVEEDARLFDNAFFGITDDEVETMDPSQRKLLEVVYEAFENGGETWESIANSRTGVYIGNISLDHILIQARDWESPKSHAAIGADTSVLANRISYIFNLHGPSLAMNTACSSSMYALHMAVSAIRNGDCDGAIVAAANWITDPSMQFVLDKLGALSPTSRCHTFDASADGYARGEGFAALYLKKSSIAVLEKMPIRAMIRGTAINANGRTGGITHPNTGGQEDVIRKAYENAGNLPFSDTAFFECHGTGTQAGDPIEVEAIGNVFAPSRSKARKDRLLIGSVKPSLGHTEGASAIASIMKVVLSLEAGEVPPTF…	gene_05394/MLMVPVQPQQVPMGRLSTEIISAALLSLRLLRAGTAGCPHLHAPSDTMSEDLKKTMRPEAFTRQLVLLPFSAHNASSLKLNIDALSTASSRWLLADIAYTLGCKRSRLQQRTFRVVDKDDVATGLAIEQRIFTSPAHTSNLAYVFTGQGAQWYAMGAELFQYAAFRTVIAYLDQVLHAHAHPGRTSTTMWRIANVLSGACEPDCVHSPAVSQVVCTAVQIGLVDLLASWGVRPVAIVGHASGEMAAAYASGRITAAEAITVAYFHGQALAKNKKKGAMLAVGLGAGQVAPYLEGWEEQVQAAALNSPSSVTLSGDEEAIAALSNKLSEDGVFNRVLPTGGNAYHSRHMKLLGNDYNAMLLDGIDRIRKLGLLNPANRYRPVPWVSSVT…	gene_12352/MESMQELEGQHEPVSIVGMGCRWAGGVSSPTGLWEMLRNNKDGWRKFDEPRFSSEAYHHPNQNRPGSTRTEGGFLVEEDARLFDNAFFGITDDEVETMDPSQRKLLEVVYEAFENGGETWESIANSRTGVYIGNISLDHILIQARDWESPKSHAATGADTSVLANRISYIFNLHGPSLAMNTACSSSMYALHMAVSAIRNGDCDGAIVAAANWITDPSMQFVLDKLGALSPTSRCHTFDASADGYARGEGFAALYLKKSSIAVLEKMPIRAMIRGTAINANGRTGGITHPNTGGQEDVIRKAYENSGNLPFSDTAFFECHGTGTQAGDPIEVEAIGNVFAPSRSKARKDRLLIGSVKPSLGHTEGASAIASIMKVVLSLEAGEVPPTF…	gene_03995/MESMQELEGQHEPVSIVGMGCRWAGGVSSPTGLWELLRNNKDGWRKFDEPRFSSEAYHHPNQNRPGSTRTEGGFLVEEDARLFDNAFFGITDDEVETMDPSQRKLLEVVYEAFENGGETWESIANSRTGVYIGNISLDHILIQARDWESPKSHAAIGADTSVLANRISYIFNLHGPSLAMNTACSSSMYALHMAVSAIRNGDCDGAIVAAANWITDPSMQFVLDKLGALSPTSRCHTFDASADGYARGEGFAALYLKKSSIAVLEKMPIRAMIRGTAINANGRTGGITHPNTGGQEDVIRKAYENAGNLPFSDTAFFECHGTGTQAGDPIEVEAIGNVFAPSRSKARKDRLLIGSVKPSLGHTEGASAIASIMKVVLSLEAGEVPPTF…	gene_02935/MEPAPDLDGQHEPVSIVGMGCRWAGGVSSPSGLWELLRNNRDGWRQFDEPRFSTRGFHHPNKDRPGSLRMQGGFLVEEDARLFDSAFFGIASREVETMDPAQRKLLEVVYEAFENGGETWESISNSRTGVYIGNCALDHVLIQARDWENPTPYAATGADTSVLANRISHIFNLHGPSMAMSTACSSSMYALHMAVSAIRNGDCDGAIVAAANWITDPNMQFVLDKLGVLSPTSRCHTFDASADGYARGEGFAALYLKKSSIAVLEQLPIRAMIRGTAINANGRTGGITHPSTTGQEDVIRKAYENAGNLPFGDTTFFECHGTGNQEDDIIEVEAIGNIFASSRSNLRKDRLLIGSVKPNLGHTEGASAIASIMKVVLSLEAGEVPPTF…	gene_09271/MESAPDLDGQHEPVSIVGMGCRWAGGVSSPSGLWELLRNNRDGWRQFDEPRFSTRGFHHPNKDRPGSLRMQGGFLVDEDARLFDSAFFGIASREVETMDPSQRKLLEVVYEAFENGGETWESISNSRTGVYIGNCALDHVLIQARDWENPKSYAATGADTSVLANRISHIFNLHGPSMAMNTACSSSMYALHMAVSAIRNDDCDGAIVAAANWITDPNMQFVLDKLGVLSPTSRCHTFDASADGYARGEGFAALYLKKSSIAVLEQLPIRAMIRGTAINANGRTGGITHPSTTGQEDVIRKAYENAGNLPFGDTTFFECHGTGNQEDDIIEVEAIGNIFASSRSNLRKDRLLIGSVKPNLGHTEGASAIASIMKVVLSLEAGEVPPTF…	gene_11691/MESMQELEGQHEPVSIVGMGCRWAGGVTSPTGLWELLRNNKDGWRKFDEPRFSAEGFHHPNQDRPGSLRTEGGFLVEEDARLFDNAFFGITAREVETMDPSQRKLLEVVYEAFENGGETWESISNSRTGVYIGSNSLDHTLIQARDWESPRSYAATGADASLLANRISYIFNLHGPSLAMNTACSSSMYALHMAVSAIRNGDCDGAIVAAANWITDPSLQSVLDKLGALSPTSRCHTFDASADGYARGEGFAAIYLKKSSIAVLEKMPIRAMIRGTAINANGRTGGITRSSTEGQEDVIRRAYENSGNLPFSDTAFFECHGTGTQAGDPIEVEAIGNVFASSRSKARKDRLLIGSVKPSLGHTEGASAIASIMKVVLSLEAGEVPPTF…	gene_00238/MQELEGQHEPVSIVGMGCRWAGGVTSPTGLWELLRNNKDGWRKFDEPRFSAEGFHHPNQDRPGSLRTEGGFLVEEDARLFDNAFFGITAREVETMDPSQRKLLEVVYEAFENGGETWESISNSRTGVYIGSNSLDHTLIQARDWESPRSYAATGADASLLANRISYIFNLHGPSLAMNTACSSSMYALHMAVSAIRNGDCDGAIVAAANWITDPSLQSVLDKLGALSPTSRCHTFDASADGYARGEGFAAIYLKKSSIAVLEKMPIRAMIRGTAINANGRTGGITRSSTEGQEDVIRRAYENSGNLPFSDTAFFECHGTGTQAGDPIEVEAIGNVFASSRSKARKDRLLIGSVKPSLGHTEGASAIASIMKVVLSLEAGEVPPTFGVK…	gene_12601/MDSAPDLDGQHEPVSIVGMGCRWAGGVSSPTGLWELLRNNRDGWREFDEPRFSAKGFHHPNQDRPGSLRTRGGFLVKEDARLFDNAFFGISDREVETMDPSQRKLLEVVYEALENGGETWESISNSRTGVYVGNFALDHILIQARDWDSPKSHAATGADTSFLANRISHIFNLHGPSLAINTACSSSMYALHMAVSAIRNGDCDGAIVAAANWITDPSMQFVLDKLGALSPTSRCHTFDASADGYARGEGFAAIYLKKSSIAILEQLPIRAMIRGTAINANGRTGGGITWSSTTSQEDVMRKAYENAGNLPFSDTTFFECHGTGTQAGDTMEVEAIGNVFASSRPNTRKDRLLIGSVKPNLGHTEGASALASIMKVVLSLEAGEVPPT…	gene_10971/MDSAPDLDGQHEPVSIVGMGCRWAGGVSSPTGLWELLRNNRDGWREFDEPRFSAKGFHHPNQDRPGSLRTRGGFLVKEDARLFDNAFFGISDREVETMDPSQRKLLEVVYEALENGGETWESISNSRTGVYVGNFALDHILIQARDWDSPKSHAATGADTSFLANRISHIFNLHGPSLAINTACSSSMYALHMAVSAIRNGDCDGAIVAAANWITDPSMQFVLDKLGALSPTSRCHTFDASADGYARGEGFAAIYLKKSSIAILEQLPIRAMIRGTAINANGRTGGGITWSSTTSQEDVMRKAYENAGNLPFSDTTFFECHGTGTQAGDTMEVEAIGNVFASSRPNTRKDRLLIGSVKPNLGHTEGASALASIMKVVLSLEAGEVPPT…	gene_11272/MDSAPDLDGQHEPVSIVGMGCRWAGGVSSPTGLWELLRNNRDGWREFDEPRFSAKGFHHPNQDRPGSLRTRGGFLVKEDARLFDNDFFGIADREVETMDPSQRKLLEVVYEAFENGGETWESISNSRTGVYIGNFALDHILIQARDWESPKSHAATGADTSFLANRISHVFNLHGPSLAINTACSSSMYALHMAVSAIRNGDCDGAIVAAANWITDPSMQFVLDKLGALSPTSRCHTFDASADGYARGEGYAAIYLKKSSIAILEQLPIRAMIRGTAINANGRTGGGITWSSTKGQEDVIRKAYENAGNLPFSDTTFFECHGTGTQAGDTMEVEAIGNVFASSRPNTRKDRLLIGSVKPNLGHTEGASALASIMKVVLSLEAGEIPPT…	gene_05568/MDSAPDLDGQHEPVSIVGMGCRWAGGVSSPTGLWELLRNNRDGWREFDEPRFSAKGFHHPNQDRPGSLRTRGGFLVKEDARLFDNAFFGIADREVETMDPSQRKLLEVVYEAFENGGETWESISNSRTGVYVGNFALDHILIQARDWDSPKSHAATGADTSFLANRISHIFNLHGPSLAINTACSSSMYALHMAVSAIRNGDCDGAIVAAANWIADPSMQFVLDKLGALSPTSRCHTFDASADGYARGEGFAAIYLKKSSIAILEQLPIRAMIRGTAINANGRTGGGITWSSTTSQEDVMRKAYENAGNLPFSDTTFFECHGTGSQAGDTMEVEAIGNVFASSRPNTRKDRLLIGSVKPNLGHTEGASALASIMKVVLSLEAGEVPPT…	gene_07312/MSRSRLSEWGADGPVVSSPTGLWELLRNNKDGWREFDEPRFSAKGFHHSNQDRSGSLRTQGGYLVEEDARLFDNAFFGITGREVETMDPSQRKLLEVVYEAFENGGETWESISNSRTGVYIGNSSLDHILIQARDWENPKPYAATGADISALANRISYIFNLIGPSLATCSSSMYALHMAVSAIRNDDCDGAIVAAANWISDPSMQFVLERLGALSPTSRCHTFDASADGYARGEGYAALYLKKSSIAVLEQLPIRAMIRGTAINANGRTGGITRPSTAGQEDVIRKAYENAGSLPFSDTAYFECHGTGTQADDPIEVEAIGNVFASSRSNSRKDRLLIGSVKPNLGHTEGASAIASIMKVVLSLEAGEVPPTFGVKNLNTHIDFAKA…		gene_14780/MESAPDLDGQHEPVSIVGMGCRWAGGVSSPTGLWELLRNNRDGWRPFDEPRFSTKGFHHPNQDRPGSLRTEGGFLVEEDARLFDSAFFGIASREVETMDPSQRKLLEVVYEAFENGGETWESISNSRTGVYIGNCALDHILIQARDWENPKSYAATGADTSVLANRISHIFNLHGPSLATNTACSSSMYALHMAVSAIRNGDCDGAIVAAANGITDPNMQFVLDKLGVLSPTSRCHTFDASADGYARGEGFAALYLKKSSIAVLEQLPIRAIIRGTAINANGRTGGITHPSTTGQEDVIRKAYENAGNLPFGDTTFFECHGTGNQEDDIIEVEAIGNVFASSRSNLRKDRLLIGSVKPNLGHTEGASAIASIMKVVLSLEAGEVPPTF…	gene_05996/MDSTPDLDGQHEPVSIVGMGCRWAGGVSSPTGLWELLRNNRDGWREFDEPRFSAKGFYHPNQDRPGSLRTRGGFLVKEDARLFDNDFFGIADREVETMDPSQRKLLEVVYEAFENGGETWESISNSRTGVYIGNFALDHILIQARDWESPKSHAATGADTSFLANRISHVFNLHGPSLAINTACSSSMYALHMAVSAIRNGDCDGAIVAAANWITDPSMQFVLDKLGALSPTSRCHTFDASADGYARGEGYAAIYLKKSSIAILEQLPIRAMIRGTAINANGRTGEVSHGPARKCHGTGTQAGDTMEVEAIGNVFASSRPNTRKDRLLIGSVKPNLGHTEGASALASIMKVVLSLEAGEVPPTFGVKNLNTNIDFAKARVEVVRDGTV…	gene_02388/MDSTPDLDGQHEPVSIVGMGCRWAGGVSSPTGLWELLRNNRDGWREFDEPRFSAKGFYHPNQDRPGSLRTRGGFLVKEDARLFDNDFFGIADREVETMDPSQRKLLEVVYEAFENGGETWESISNSRTGVYIGNFALDHILIQARDWESPKSHAATGADTSFLANRISHVFNLHGPSLAINTACSSSMYALHMAVSAIRNGDCDGAIVAAANWITDPSMQFVLDKLGALSPTSRCHTFDASADGYARGEGYAAIYLKKSSIAILEQLPIRAMIRGTAINANGRTGGGITWSSTKGQEDVIRKAYENAGNLPFSDTTFFECHGTGTQAGDTMEVEAIGNVFASSRPNTRKDRLLIGSVKPNLGHTEGASALASIMKVVLSLEAGEVPPT…	gene_13737/MPSLASPMTRWKPWTRRSGSCSRSSTKPSRTEARRGKALLTLVPVCTSATFPWTTSSSKLAIGRAPSRTPRLEQIPVSWPTVLVIYLIFMDPAFHSLAMNTACSSSMYALHMAVSAIRNGDCDGAIVAAANWITDPSMQFVLDKLGALSPTSRCHTFDASADGYARGEGFAALYLKKSSIAVLEKMPIRAMIRGTAINANGRTGGITHPNTGGQEDVIRKAYENAGNLPFSDTAFFECHGTGTQAGDPIEVEAIGNVFAPSRSKARKDRLLIGSVKPSLGHTEGASAIASIMKVVLSLEAGEVPPTFGVKNLNTQIDFDKARVEVVRDHTVQWPEGKLRRASINSFGFGGANGHCVIDHVNVVLPGYTKPGILARPAAANRSATETAP…
PKS11	gene_08143/MASNDLMPIAIVGMACRLPGDCSTPDDFWKLLTKCRSGWSKIPKDRFNQEAYNHPNPEKKGTLNSQGGYFISQDLEMFDPGFFDMTKKEAETMDPTQRLLLECTYEAIENAGIPKEQINGKRVGVFVGGPDNEHRMGNLRDLDDAPMYDPTGAQGAFLAGRIAYFFNLRGPTFTVDTACSSSMHALHMAVQSIRAGESDQAIVGASHLITQPDVWVSMAKLRLFAESGKTYAFDHRAKSGYARGEGVGCIILKPLDKALEDKDHVRAVIAHTGLSHNGRTVGIVAPSSEEQERLVRHVMEQAKVDPTKVGFFEAHGTGTAVGDPIEATAIFRALSKGRSGEDPLQLGSVKSNIGHLENASGLISVIKAALMLEKGFVVPNADFEQPNP…	gene_05820/MASNDLMPIAIVGMACRLPGDVSTPDDFWKLLTKCRSGWSKIPRDRFNQEAYNHPNPEKKGTLNSQGGYFISQDLEMFDPGFFDMTKKEAETMDPTQRILLECTYEAIENAGIPKEQITGQRIGVFVGGPDNEHRMGNLRDLDDAPMYDPTGAQGAFLAGRIAYFFNLRGPTFTVDTACSSSMHAIHMAVQSIRSGESDQAIVGASHLITQPDVWVSMAKLRLFAESGKTYAFDHRAKSGYARGEGVGCIILKPLDKALEDKDHVRAVIAHTGLSHNGRTVGIVAPSSEEQERLVRQVMEQAKLDPSKVGFFEAHGTGTAVGDPIEATAIFRALSKGRSGEDPLQLGSVKSNIGHLENASGIISVIKAALMLEKGFIVPNADFEQPNP…	gene_10573/MASNDLMPIAIVGMACRLPGDCSTPDDFWKLLTKCRSGWSKIPKDRFNQEAYNHPNPEKKGTLNSQGGYFISQDLEMFDPGFFDMTKKEAETMDPTQRLLLECTYEAIENAGIPKEQINGKRVGVFVGGPDNEHRMGNLRDLDDAPMYDPTGAQGAFLAGRIAYFFNLRGPTFTVDTACSSSMHALHMAVQSIRAGESDQAIVGASHLITQPDVWVSMAKLRLFAESGKTYAFDHRAKSGYARGEGVGCIILKPLDKALEDKDHVRAVIAHTGLSHNGRTVGIVAPSSEEQERLVRHVMEQAKVDPTKVGFFEAHGTGTAVGDPIEATAILRALSKGRSGEDPLQLGSVKSNIGHLENASGLISVIKAALMLEKGFVVPNADFEQPNP…	gene_10484/MASNDLMPIAIVGMACRLPGDCSTPDDFWKLLTKCRSGWSKIPKDRFNQEAYNHPNPEKKGTLNSQGGYFISQDLEMFDPGFFDMTKKEAETMDPTQRLLLECTYEAIENAGIPKEQINGKRVGVFVGGPDNEHRMGNLRDLDDAPMYDPTGAQGAFLAGRIAYFFNLRGPTFTVDTACSSSMHALHMAVQSIRAGESDQAIVGASHLITQPDVWVSMAKLRLFAESGKTYAFDHRAKSGYARGEGVGCIILKPLDKALEDKDHVRAVIAHTGLSHNGRTVGIVAPSSEEQERLVRHVMEQAKVDPTKVGFFEAHGTGTAVGDPIEATAIFRALSKGGRAKTLSSLSNIGHLENASGLISVIKAALMLEKGFVVPNADFEQPNPKIPL…	gene_16388/AKVVKKDIMASNDLMPIAIVGMACRLPGDCSTPDDFWKLLTKCRSGWSKIPKDRFNQEAYNHPNPEKKGTLNSQGGYFISQDLEMFDPGFFDMTKKEAETMDPTQRLLLECTYEAIENAGIPKEQINGKRVGVFVGGPDNEHRMGNLRDLDDAPMYDPTGAQGAFLAGRIAYFFNLRGPTFTVDTACSSSMHALHMAVQSIRAGESDQAIVGASHLITQPDVWVSMAKLRLFAESGKTYAFDHRAKSGYARGEGVGCIILKPLDKALEDKDHVRAVIAHTGLSHNGRTVGIVAPSSEEQERLVRHVMEQAKVDPTKVGFFEAHGTGTAVGDPIEATAIFRALSKGRSGEDPLQLGSVKSNIGHLENASGLISVIKAALMLEKGFVVPN…	gene_11877/MASNDLMPIAIVGMACRLPGDCSTPDDFWKLLTKCRSGWSKIPKDRFNQEAYNHPNPEKKGTLNSQGGYFISQDLEMFDPGFFDMTKKEAETMDPTQRLLLECTYEAIENAGIPKEQINGKRVGVFVGGPDNEHRMGNLRDLDDAPMYDPTGAQGAFLAGRIAYFFNLRGPTFTVDTACSSSMHALHMAVQSIRAGESDQAIVGASHLITQPDVWVSMAKLRLFAESGKTYAFDHRAKSGYARGEGVGCIILKPLDKALEDKDHVRAVIAHTGLSHNGRTVGIVAPSSEEQERLVRHVMEQAKVDPTKVGFFEAHGTGTAVGDPIEATAIFRALSKGRSGEDPLQLGSVKSNIGHLENASGLISVIKAALMLEKGFVVPNADFEQPNP…	gene_04463/MPEFPKSRSTASGLFAESGKTYAFDHRAKSGYARGEGVGCIILKPLDKALEDKDHVRAVIAHTGLSHNGRTVGIVAPSSEEQERLVRHVMEQAKVDPTKVGFFEAHGTGTAVGDPIEATAIFRALSKGRSGEDPLQLGSVKSNIGHLENASGLISVIKAALMLEKGFVVPNADFEQPNPKIPLTKWNMEIPTRQKPIAFNQQYVCVNNFGYSGSNGHAILQSAPPEDSESLFDIAKTSDHIMLKRLFVLSANDEAALRQSMEKLGIFLEQHAELYQTTMPRNLAYTLCQRRSHMPWRMAIVTDVCSSLAVALNSADAVPRRASVKSPKVAFVFTGQGAQWFAMGRELLTSHPVFASAIKRADQHLLRIGSDFSLLEELLRTKEESQVN…	gene_02402/MGSKNDLMPIAIVGMACRLPGDVSTPDDFWKLLTKCRSGWSRVPKDRFNQDAYNHPNPEKKGTINSQGGYFISQDLEMFDPGFFDMTKKGGRDYGYASYPTQRLMLECTYEAIENAGIPKEQISGKRVGVFVGGPDNEHRMGNLRDLDDAPMYDPTGAQGAFLAGRIAYFFNLRGPTFTVDTACSSSMHALHMAVQSIRNGESDQAIVGASHLITQPDVWVSMAKLRLFAESGKTYAFDHRAKSGYARGEGVGCIILKPLDKALEDKDHVRAVIAHTGLSHNGRTVGIVAPSPEEQERLVRDVMEQAKIEPGKVGFFEAHGTGTAVGDPIEATAIFRAVSKGRSGEDPLQLGSVKSNIGHLENASGIISVIKAALMLEKGFIVPNADF…	gene_10536/MGSKNDLMPIAIVGMACRLPGDVSTPDDFWKLLTKCRSGWSKIPKDRFNQDAYNHPNPEKKGTINSQGGYFISQDLEMFDPGFFDMTKKEAETMDPTQRLMLECTYEAIENAGIPKEQISGKRVGVFVGGPDNEHRMGNLRDLDDAPMYDPTGAQGAFLAGRIAYFFNLRGPTFTVDTACSSSMHALHMAVQSIRNGESDQAIVGASHLITQPDVWVSMAKLRLFAESGKTYAFDHRAKSGYARGEGVGCVILKPLDKALEDKDHVRAVIAHTGLSHNGRTVGIVAPSPEEQERLVRDVMEQAKIEPSKVGFFEAHGTGTAVGDPIEATAIFRAVSKGRSGEDPLQLGSVKSNIGHLENASGIISVIKAALMLEKGFIVPNADFEQPN…	gene_10411/LSNIMASNDLMPIAIVGMACRLPGDVSTPDDFWKLLTKCRSGWSKIPKDRFNQEAYNHPNPEKKGTLNSQGGYFISQDLEMFDPGFFDMTKKEAETMDPTQRILLECTYEAIENAGIPKEQITGKRIGVFVGGPDNEHRMGNLRDLDDAPMYDPTGAQGAFLAGRIAYFFNLRGPTFTVDTACSSNQAIVGASHLITQPDVWVSMAKLRLFAESGKTYAFDHRAKSGYARGEGAGCIILKPLDKALEDKDHVRAVIAHTGLSHNGRTVGIVAPSSEEQERLVRNVMEQAKISPEKVGFFEAHGTGTAVGDPIEATAIFRALSKGRSGEDPLQLGSVKSNIGHLENASGIISVIKAALMLEKGFVVPNADFEQANPKIPLTKWNMEIPT…	gene_01493/MASNDLMPIAIVGMACRLPGDVSTPDDFWKLLTKCRSGWSKIPKDRFNQEAYNHPNPEKKGTLNSQGGYFISQDLEMFDPGFFDMTKKEAETMDPTQRILLECTYEAIENAGIPKEQITGKRIGVFVGGPDNEHRMGNLRDLDDAPMYDPTGAQGAFLAGRIAYFFNLRGPTFTVDTACSSSMHAIHMAVQSIRSGESDQAIVGASHLITQPDVWVSMAKLRLFAESGKTYAFDHRAKSGYARGEGAGCIILKPLDKALEDKDHVRAVIAHTGLSHNGRTVGIVAPSSEEQERLVRNVMEQAKISPEKVGFFEAHGTGTAVGDPIEATAIFRALSKGRSGEDPLQLGSVKSNIGHLENASGIISVIKAALMLEKGFVVPNADFEQANP…	gene_11497/MGSPNDDLMPIAIVGMACRLPGDVSTPDDFWKLLTKCRSGWSKIPKDRFNQEAYNHPNPEKKGTINSQGGYFISQDLEMFDPGFFDMTKKEAETMDPTQRLMLECTYEAIENAGIPKEAITGKRVGVFIGGPDNEHRMGNLRDLDDAPMYDPTGGPGRLPGGPHRLLLQPARAHLHRRHGLLLEHARAAHGGAEHPQRRVGAGYCRGVASHHPARRVGVHGQVTLTIDRLFAESGKTYAFDHRAKSGYARGEGVGCVILKPLDKALEDKDHVRAVIAHTGLSHNGRTVGIVAPSSEEQERLVRNVMEQAKIDPTKVGFFEAHGTGTAVGDPIEATAIFRAVSKGRTGEDPLQLGSVKSNIGHLENASGIISVIKAALMLEKGFIVPNA…	gene_16225/MGSPNDDLMPIAIVGMACRLPGDVSTPDDFWKLLTKCRSGWSKIPKDRFNQEAYNHPNPEKKGTINSQGGYFISQDLEMFDPGFFDMTKKEAETMDPTQRLMLECTYEAIENAGIPKEAITGKRVGVFIGGPDNEHRMGNLRDLDDAPMYDPTGAQGAFLAGRIAYFFNLRGPTFTVDTACSSSMHALHMAVQSIRNGESEQAIVGASHLITQPDVWVSMAKLRLFAESGKTYAFDHRAKSGYARGEGVGCVILKPLDKALEDKDHVRAVIAHTGLSHNGRTVGIVAPSSEEQERLVRNVMEQAKIDPTKVGFFEAHGTGTAVGDPIEATAIFRAVSKGRTGEDPLQLGSVKSNIGHLENASGIISVIKAALMLEKGFIVPNADFEQP…	gene_10263/MMPIAIVGMACRLPGDVSTPDDFWKLLTKCRSGWSQIPKDRFNPEAYQHPNPEKKGTINSQGGYFISQDLEMFDPGFFDMTKKEAETMDPTQRLMLECTYEAIENAGIPKEAITGKRVGVFIGGPDNEHRMGNLRDLDDAPMYDPTGAQGAFLAGRIAYFFNLRGPTFTVDTACSSSMHALHMAVQSIRNGESEQAIVGASHLITQPDVWVSMAKLRLFAESGKTYAFDHRAKSGYARGEGVGCVILKPLDKALEDKDHVRAVIAHTGLSHNGRTVGIVAPSSEEQERLVRNVMEQAKIDPTKVGFFEAHGTGTAVGDPIEATAIFRAVSKGRKEADPLQLGSVKSNIGHLENASGIISVIKAALMLEKGFIVPNADFEQANPKIPLT…	gene_15693/MGSPNDDLMPIAIVGMACRLPGDVSTPDDFWKLLTKCRSGWSKIPKDRFNQEAYNHPNPEKKGTINSQGGYFISQDLEMFDPGFFDMTKKEAETMDPTQRLMLECTYEAIENAGIPKEAITGKRVGVFIGGPDNEHRMGNLRDLDDAPMYDPTGAQGAFLAGRIAYFFNLRGPTFTVDTACSSSMHALHMAVQSIRNGESEQAIVGASHLITQPDVWVSMAKLRLFAESGKTYAFDHRAKSGYARGEGVGCVILKPLDKALEDKDHVRAVIAHTGLSHNGRTVGIVAPSSEEQERLVRNVMEQAKIDPTKVGFFEAHGTGTAVGDPIEATAIFRAVSKGRTGEDPLQLGSVKSNIGHLENASGIISVIKAALMLEKGFIVPNADFEQP…	gene_07006/MGSNDELMPIAIVGMACRLPGDVSTPDDFWKLLTKCRSGWSKIPKDRFNQDAYNHPNPEKKGTINSQGGYFISQDLEMFDPGFFDMTKKEAETMDPTQRLMLECTYEAIENAGIPKEQITGKRVGVFIGGPDNEHRMGNLRDLDDAPMYDPTGAQGAFLAGRIAYFFNLRGPTFTVDTACSSSMHALHMAVQSIRNGESDQAIVGASHLITQPDVWVSMAKLRLFAESGKTYAFDHRAKSGYARGEGVGCVILKPLDKALEDKDHIRAVIAHTGLSHNGRTVGIVAPSSEEQERLVRNVMEQAKIEPSKVGFFEAHGTGTAVGDPIEATAIFRAVSKGRSGQDPLQLGSVKSNIGHLENASGIISVIKAALMLEKGFIVPNADFEQPN…	gene_08692/MASNDLMPIAIVGMACRLPGDVSTPDDFWKLLTKCRSGWSKIPKDRFNQEAYSHPNPEKKGTINSQGGYFISQDLEMFDLSFFDMTKKEAETMDPTQRLLLECTYEAIENAGIPKEHITGKRIGVFVGGPDNEHRMGNLRDLDDVPMYDPTGAQGAFLAGRISYFFNLRGPAYTVDTACSSSMHAIHMAVQSIRSGESDQAIVGASHLITQPDVWVSMAKLRLFAESGKTHAFDHRAKSGYARGEGVGCVILKPLDQALADKDHIRAVIAHTGLSHNGRTVGIVAPSSEEQERLVRNVMEEAKVDPNQVGFFEAHGTGTAVGDPIEATAIYRALGKGRTGKGRLQLGSVKSNVGHLENASGIISVIKAALMLEKGFIVPNADFEQANP…		gene_06510/MGSTTTPNDDLMPIAIVGMACRLPGDVSTPDDFWKLLTKCRSGWSKIPKDRFNPEAYQHPNPEKKGTINSQGGYFISQDLEMFDPGFFDMTKKEAETMDPTQRLMLECTYEAIENAGIPKEAITGKRVGVFIGGPDNEHRMGNLRDLDDAPMYDPTGAQGAFLAGRIAYFFNLRGPTFTVDTACSSSMHALHMAVQSIRNGESEQAIVGASHLITQPDVWVSMAKLRLFAESGKTYAFDHRAKSGYARGEGVGCVILKPLDKALEDKDHVRAVIAHTGLSHNGRTVGIVAPSSEEQERLVRNVMEQAKIDPTKVGFFEAHGTGTAVGDPIEATAIFRAVSKGRKEADPLQLGSVKSNIGHLENASGIISVIKAALMLEKGFIVPNADF…	gene_01868/MGSTTTPNDGLMPIAIVGMACRLPGDVSTPDDFWKLLTKCRSGWSKIPKDRFNPEAYQHPNPEKKGTINSQGGYFISQDLEMFDPGFFDMTKKEAETMDPTQRLMLECTYEAIENAGIPKEAITGKRVGVFIGGPDNEHRMGNLRDLDDAPMYDPTGAQGAFLAGRIAYFFNLRGPTFTVDTACSSSMHALHMAVQSIRNGESEQAIVGASHLITQPDVWVSMAKLRLFAESGKTYAFDHRAKSGYARGEGVGCVILKPLDKALEDKDHVRAVIAHTGLSHNGRTVGIVAPSSEEQERLVRNVMEQAKIDPTKVGFFEAHGTGTAVGDPIEATAIFRAVSKGRKEADPLQLGSVKSNIGHLENASGIVSVIKAALMLEKGFIVPNADF…	gene_13274/MASNDLMPIAIVGMACRLPGDCSTPDDFWKLLTKCRSGWSKIPKDRFNQEAYNHPNPEKKGTLNSQGGYFISQDLEMFDPAFFDMTKKEAETMDPTQRLLLECTYEAIENAGIPKEQINGKRVGVFVGGPDNEHRMGNLRDLDDAPMYDPTGAQGAFLAGRIAYFFNLRGPTFTVDTACSSSMHALHMAVQSIRAGESDQAIVGASHLITQPDVWVSMAKLRLFAESGKTYAFDHRAKSGYARGEGVGCIILKPLDKALEDKDHVRAVIAHTGLSHNGRTVGIVAPSSEEQERLVRHVMEQAKVDPTKVGFFEAHGTGTAVGDPIEATAIFRALSKGRSGEDPLQLGSVKSNIGHLENASGLISVIKAALMLEKGFVVPNADFEQPNP…
PKS12	gene_05630/MANTNQRIPSILVFGPQTRPSLDDLADLRHELHSNSRLSKVHAAALDLPIFWRKLVAFDTDLSQVPAESHLQEFLEWLNGERETPYCARKCPITLTFLLNYLIQLKQYVHFLHSVDRDGNKDVQSALLERLRLGGVHGFCVGFLCAVVVSLSGSEDDLADNAVRALCLAFSIGVYVDRDAAIEATTCISARWRHKQASAVEKALIGLKGYPEAYIAGITDETSMTITIPDSHLAGLVPNLEGHGFSVREIPVDGRFHSSVYTSAVERVIRFFAKSPDLRFPPSNQLQVPIRSATDGKPIRQGDLVRHCLENTLLKPVNWYQTLTLAIDDVPQRQKCIALAGLSNHFPLSLLSNQNTQLQLLREMRRNSADIYDTLSSNTAPELTSSST…	gene_07217/MATNQIAPSLLVFGPQTRPSPNDLADLRHELLTNPSLSKAYAAAVDLPKFWERLLMLDADLVQVPAKSHLHEFVEWLKGERETPYCAVKCPITLTFLLNFLIQIKQYVRFLHSVDSGEAEDAQFLMLKRLRRGGVHGFCVGFLCAIVVSLSKTESELADNAVRALRLALVIGVYVDKDSKNGITTCISARWRHKQTNALETALTVLKGYPEAYIAGITDETSMTITIPNTRLSGLVPGLERHGFSVREIPVDGRFHCAVYHVVTEKLVAFFAGTPDLRFPSPDQLQVPIRSTTDGRTICRGDLVRHTLENTLLKQVNWYQTITLAMADVPQTQKCIALAGLSNHFPLSLISNPDTQLQLLRGLGGNGTESCNNLSNPTGPDVTPSSTN…	gene_05527/MAKSNQTIPSILVFGPQTRPSPNDLADLRHELRSNSRLSRVHAGALDLPIVWRKLVALDSDLSQVAADSHLQEFLEWLEGERETPYCARKCSITLTFLLNYLIQIKQYVRFLHSVDRGENRDTQSSMLERLRLGGVHGFCVGFLCATVVSLSGSEDGLADNAVRALRLAFAIGVYVERDTTNEPTTCISARWRHKQANAIENARIVLNSYPEAYIAGITDETSMTITIPNSHLAGLVPGLEGHGFSVREIPVDGRFHSPVYTSVVERLVSFFTQSPDLRFPSPDQLQVPIRSGTNGKPIQQGDLIRHSLENTLLKPVNWYKTLTLAMDDIPQKQKCIALAGLSNHFPLSLVSNPNTQLQLLRGLGSHAADIYDTTSSITGAELTPSST…	gene_11701/MAKSNQTIPSILVFGPQTRPSPNDLADLRHELRSNSRLSRVHAGALDLPIVWRKLVALDSDLSQVAADSHLQEFLEWLEGERETPYCARKCSITLTFLLNYLIQIKQYVRFLHSVDRGENRDAQSSMLERLRLGGVHGFCVGFLCATVVSLSGSEDDLADNAVRALRLAFAIGVYVERDTTNEPTTCISARWRHKQANAMENARIVLNSYPEAYIAGITDETSMTITIPNSHLAGLVPGLEGHGFSVREIPVDGRFHSPVYTSVVERLVSFFTQSPDLRFPSPDQLQVPIRSGTDGKPIQQGDLIRHSLENTLLKPVNWYKTLTLAMDDIPQKQKCIALAGLSNHFPLSLVSNPNTQLQLLRGLGSHAADIYDTTSSITGAELTPSST…	gene_11963/MAKSNQTIPSILVFGPQTRPSPNDLADLRHELRSNSRLSRVHAGALDLPIVWRKLVALDSDLSQVAADSHLQEFLEWLEGERETPYCARKCSITLTFLLNYLIQIKQYVRFLHSVDRGENRDAQSSMLERLRIGGVHGFCVGFLCATVVSLSGSEDDLADNAVRALRLAFAIGVYVERDTTNEPTTCISARWRHKQANAIENARIVLNSYPEAYIAGITDETSMTITIPNSHLAGLVPGLEGHGFSVREIPVDGRFHSPVYTSVVERLVSFFTQSPDLRFPSPDQLQLQLLRGLGSHAADIYDTTSSITGAELTPSSTKEGNDTEGSWVFASDEDVSGDDSSTHGLPSDFPPHSVAVVGMAGRFPGANSVDEFWDLLSTGASAVQEAP…	gene_09967/MAKSNQTIPSILVFGPQTRPSPNDLADLRHELRSNSRLSRVHAGALDLPIVWRKLVALDSDLSQVAADSHLQEFLEWLEGERETPYCARKCSITLTFLLNYLIQIKQYVRFLHSVDRSENRDAQSSMLERLRLGGVHGFCVGFLCATVVSLSGSEDELADNAVRALRLAFAIGVYVERDTTNEPTTCISARWRHKQANAMENARIVLNSYPEAYIAGITDETSMTITIPNSHLAGLVPGLEGHEFSVREIPVDGRFHSPAYTSVVERLVSFFTQSPDLRFPSPDQLQVPIRSGTDGKPIQQGDLIRHSLENTLLKPVNWYKTLTLAMDDIPQKQKCIALAGLSNHFPLSLVSNPNTQLQLLRGLGSHAADIYDNTSIITGAELTPSST…	gene_11478/MAKSNQTIPSILVFGPQTRPSPNDLADLRHELRSNSRLSRVHAGALDLPIVWRKLVALDSDL SQVAADSHLQEFLEWLEGERETPYCARKCSITLTFLLNYLIQIKQYVRFLHSVDRGENRDAQ SSMLERLRLGGVHGFCVGFLCATVVSLSGSEDDLADSAVRALRLAFAIGVYVERDTTNEPTTC ISARWRHKQANAMENARIVLNSYPEAYIAGITDETSMTITIPNSHLAGLVPGLEGHGFSVRE IPVDGRFHSPVYTSVVERLVSFFTQSPDLRFPSPDQLQLQLLRGLGSHAADIYDTTSSITGA ELTPSSTKEGNDTEGSWVFASDEDVSGDDSSTHGLPSDFPPHSVAVVGMAGRFPGANSVDEF WDLLSTGTS…	gene_05752/MATFKQSVPSLLVFGPQTRPSPDDLAQLRHELISNPRLSKVLAAALDLPKFWHELNAFIPALAQIPAESHLHEFVEWLKGERKAPYCAQQCPITITFMLNFLIQIKQYIRLLRSLDFGGADDAQSLVLERLRDGGVHGFCMGFLCAVTVSLSKTEEDIAENASVALRLALAIGVHVDKDASKEVTTCISARWRHKQPNAFHKALAVLEEYPEAYVAGITDETSMSITTPDAHLAGLVPALEGHGFSVREIPVDGRFHSIFYTSAVETLVEFFDKTHSHRFPGPENLQIPIRSSTNGKAIFQGGLVRHALENTLLKPVDWYRTLTLAMADVPEKQKHIALAGLSNHFPPSLMKNPYIQLQFLKEVGGTDTEIYDNVSSTTGPEPTPDSI…	gene_08037/MAVPRQLTPWKSSRQVACVNSYGAAGSNSVVMACGPPTPAPIIRTNASRAGMPSKLPLIISAATKSSLSQYCQKLLDWLQVNRSPESPDTQIADVLFNLADRANRSLEQNLLASVSDIDDLKSKLSAATREDNSAFITPPLPKPVVLVFSGQESQYVGLSESIPATLDIFRHHLDECQDLLVHYLGLEGLYPAIFQRTPISDIVTLHAALFSVQYASARAWMDCGLRVSAVVGHSFGQLTALCIAGALSLADAIRLVTGRAALIKTHWGAEPGCMLAIQGNRQRVKAFLEQVKDKTDYAEIACLNGPKNHVVVGVSKSIDKIEALVAEEGQRDGIRAKRLPVTHGFHSAFTEALLPPLEDLASELQWNNPTIHLELCEEASRDQKLDH…			gene_04487/MANLIPSLLVFGPQTRPSPDDIAELRQELLRNPLLAKVYSGALDLPKFLKDLVLVDSALDHAPAESYIHDFVEWLREYRETPYCALQCPITLTFLLNFLIQINQYLRFLRSVDREEVHDAHSLMLGSLQQGGVHGFCVGFLCAITVSLSKSEEEIGDNAARALWLALAIGVCVDKDATTEPTTCISARWRRNQANALDKALAVLKAYPEAYIAGITDETSMTITIPDAHLAGLVPALEVHGFSVREIPVDGRFHSTVYTSVTERLVGFFATSPDLRLPGAEQLQVPVRSATDSKVICRGDLVRHVLENTLLKQVNWYQTITLAMADVPPTRKCIALAGLSNHFPLSLVKNPDIQLHFIRDLGEAGTEINDNLSSTTGPEPTPESTNGG…	gene_05526/MANLIPSLLVFGPQTRPSPDDIAELRQELLRNPLLAKVYSGALDLPKSLKDLVLVDSALDHAPAESYIHDFVEWLREYRETPYCALQCPITLTFLLNFLIQINQYLRFLRSVDREEVHDAHSLMLGSLQQGGVHGFCVGFLCAITVSLSKSEEEIGDNAARALWLALAIGVCVDKDATTEPTTCISARWRRNQANALDKALAVLKAYPEAYIAGITDETSMTITIPDAHLAGLVPALEVHGFSVREIPVDGRFHSTVYTSVTERLVGFFATSPDLRLPGAEQLQVPVRSATDSKVICRGDLVRHVLENTLLKQVNWYQTITLAMADVPPTRKCIALAGLSNHFPLSLVKNPDIQLHFIRDLGEAGTEINDNLSSTTGPEPTPESTNGG…	gene_09046/MANSTQSIPSLLVFGPQTRPSPDDLEELREELVSNRLLWEIYFAALDLPEFWRKLVAFDPELAKVPAESHTHDLVEWLQTGFKDGRRTRDFALQCPITLTFLLNFLIQIKQYMLFLRSVDTEEAGDVQASMLKRLDRGGVHGFCVGFLCAITVSLSTSEEDVAENAARVLPLALAIGAYVDKDAANEPTTCISARWRYKQVNALDKALAVLKAYPEAYIAGITDETSMTITIPDAHLAGLVPGLEGHGFSVREIPVDGRFHSSVYTSAAERLVAFFAKTPDLRLPGPEQLQIPVRSSTDGKIICGDDLVRHALDNTLLKPVNWYQTVTLAMADVPQKQKCIALAGLSNHFPLSLVKSPDIQLQLLRDLGEKGTELDDNPSSIAGPEPT…	gene_02577/MANSNPSLFVFGPQTRPSPDDLAELRQELLHNPLLAKVCLGALNLPKFWKKLVLFDSELNQTLAGSHIHEFVEWLTSSRETPFSAPQCPITLTFLLNFLIQINQYLRFLRSIDSDGAPDTQSLMLGRLQHGGVHGFCVGFLCAVTVAMSRSEEKIGENAARALYLALAIGVYVEMDAGIEPTTCISARWRHNQANALDKALAILKAYPEAYIAGITDETSMTITIPDAYLAGLVPVLEGHGFSVREIPVDGRFHSTVYTSVTERLVGFFAESTKQRFPGPEQLQVPVRSATDGKVICRGDLVRHALENTLLKQVNWYQTITLAMADVPQTQKCIALAGLSNHFPLSLVRNPDIQLHFIRDLGETSMEINDNLSSTTGPEPTPESTNGG…		gene_04546/MATSKPMIPSLFVFGPQTRPSADDLAELRHELVSNPQLSKVYAVALDLPKFWQRLVVLDSDLGQVPAESHLHEFVEWLKGKRESPYCALRCPITLTFLLNFLIQIKQYLRFLHSVDTEDAEDAQSLMLERLHFGGVHGFCVGFLCAITVSLSGSEKEIAENAVRALPLALAIGAYVDKDAANGATTCISARWRHKQANAVDKAIGVLRGYPEAYIAGITDETSMTITIPNAHLSGLVPGLECYGFSVREIPVDGRFHSSVYGSVVERLVGFFAKTPDLQFPGPEQLHIPIRSATDGRTIGRGDLVRYALENTLLKQVDWYKTLMLAMDDVPQKQKYIALAGASNHFPLSLMSNPDIQLTLLRGLTEPQAEIGTDFYDNTSSTTGPEPT…	gene_03035/MKSPREALACDPQQRKLLEVVYDALESSGYFGAQTCHTSGSTDYGCYIGATQNNYVNNVSTQPPSAYATIGTGRSFISGAVSHYFGWTGPALTVDTACSSSLVAIHTACQAILAGDCTGAVAGGTNIITSPHDYRDLQAAGFLSPTGQCKPFDADADGYCRGEAVAVVVLKSLATAIKDHDRILGVIMGSAVNQNSNEAHITVPHSGSQTNLYHKVMTTSQVAPGDVTFVEAHGTGTTVGDPIEVRSLRDAFGGASRRDSTLYFSSLKGNMGHAESAAGVAGLIKVLLMLKHGQIPPQASHQSLHPAIPALEPDRMAVPRQLTPWRSARQVACVNSYGAAGSNSAVMVCGPPTPDPVSTIKASQVGMPSKLPLIISAATKSSLSQCCQ…	gene_09917/MTPSLLVFGPQTRPSPDDLEALREELVSNRLLWKIYFAALDLPEFWQKLVAFDPELAKLPAKSYIHDLVEWLKTGAKDERDTRYFALRCPITLTFLLNFLIQIKQYLCFLRSVDTGEAGDVQAFMLKRLQHGGVHGFCVGFLCAITVSLSKSEEEIAENAARVLPLALAIGVYVDKDATNEPTTCISARWRHKQVNALDKALAVLKAYPEAYVAGITDETSMTITIPDVHLAGLVPGLEGHGFSVREIPVDGRFHSTVYTSAAERLVAFFAKTPDLRLPGPEQLQIPVRSSTDGKIICGGDLVRHALDNTLLKLVNWYQTVTLAMADLQQKQKCIALAGLSNHFPLSLVKSPDIQLQLLRDLGEKGTELDDNPSSTTGPDPLPGSPNG…	gene_13502/MTPSLLVFGPQTRPSPDDLEALREELVSNRLLWKIYFAALDLPEFWQKLVAFDPELAKLPAKSYIHDLVEWLKTGAKDERDTRYFALRCPITLTFLLNFLIQIKQYLCFLRSVDTGEAGDVQAFMLKRLQHGGVHGFCVGFLCAITVSLSKSEEEIAENAARVLPLALAIGVYVDKDATNEPTTCISARWRHKQVNALDKALAVLKAYPEAYVAGITDETSMTITIPDVHLAGLVPGLEGHGFSVREIPVDGRFHSTVYTSAAERLVAFFAKTPDLRLPGPEQLQIPVRSSTDGKIICGGDLVRHALDNTLLKLVNWYQTVTLAMADLQQKQKCIALAGLSNHFPLSLVKSPDIQLQLLRDLGEKGTELDDNPSSTTGPDPLPGSPNG…	gene_06964/MAKSNQTIPSILVFGPQTRPSPNDLADLRHELRSNSRLSRVHAGALDLPIVWRKLVALDSDLSQVAADSHLQEFLEWLEGERETPYCARKCSITLTFLLNYLIQIKQYVRFLHSVDRSENRDAQSSMLERLRLGGVHGFCVGFLCATVVSLSGSEDELADNAVRALRLAFAIGVYVERDTTNEPTTCISARWRHKQANAMENARIVLNSYPEAYIAGITDETSMTITIPNSHLAGLVPGLEGHEFSVREIPVDGRFHSPAYTSVVERLVSFFTQSPDLRFPSPDQLQVPIRSGTDGKPIQQGDLIRHSLENTLLKPVDWYKTLTLAMDDIPQKQKCIALAGLSNHFPLSLVSNPNTQLQLLRGLGSHAADIYDNTSSITGAELTPSST…
PKS13	gene_08832/MQSATVLLFGDQLASKTSAVARLYETAKTRLSLRAFLRDATDVVQCLRQDLQPCERQLYGDFADIRDLTCRHESAEHLNEAVGTTLITIIQLAELLILAEDEPAILCNENETHGIGVCIGLLAAAVAATATTARDVMHLGLECIAISFRLGIELWRRTRSVEESPQSWACTFVGIDVEEVQKRLDLVNHGYPSLRTAYIGVEASTWATVFAPPATLKRLLESEHFNQTSTSRLPSAIAVHASHLPALDVDRIIGSSSLLDNPTRCEGIFSSSTCEPYDASTLRDLLRLIIADIAQLPLYLEDTIKNVASSLQGTKSARLLAMGPTHSVAFVQRELQRVVPTVNIANISIDDDVPSSESYSRGSDRVAIVGMSGRFPDSDSTSELWDLL…	gene_12153/MQSATVLLFGDQLASKTSAVARLYKIAKTRPSLRAFLRDATDVVQCLRQNLHPCERQLYGDFADIRDLTCRHESAEHLNEAVGTTLITIIQLAELLIVAEDEPAILCTENQTHGIGVCIGLLAAAVAATATTARDVVRLGLECVAISFRLGIELWRRTRSVEDSPESWACTFVGIDAAQVQQRLDLFNHDCPRLRTAYIGVEASTWATVFAPPATLKRLLDSEHFNQVSTSRLPSAIAVHATHLPALDVDHILGSSSLLDTLTRCECVFSSSTCEPYDALTLRDLLRMVIADIAHLPLYLEGTIKSVASSLQGRDNARLLPVGPTHSVSFVQRELQRVITTVNIENIIVDDEVLNSEGYSRGSDRVAIVGMSGRFPDSESTSELWDLL…	gene_01456/MQSATVLLFGDQLASKTSAAARLYEIAKTRPSLRAFLRDATDVVQCLRQDLHPCERQLYGDFADICDLTCRHESAEHLNEAVGTTLITIIQLAELLTLAEDEPAILSNENQTHGIGVCIGLLAAAVAATATTARDVVHLGLECIAISFRLGIELWRRTQSVEYSPESWACTFVSIDAEQVQQRLDLFNQGCPSLRTAYIGVEASTWATVFAPPATLKRLLESDHFNHTSTSRLPSAIAVHASHLPALDVDRILGSSSLLDTLTSCEGIFSSSTCEPYDATTLRDLLRMAIADIAQLPLYLEDTIKNVASSLQGTGNARLLTVGPTHSVAFVQRELQRVVPTVTIANITIVDDVLSSEGYSRGSDRVAIVGMSGRFPDSESTSELWDIL…	gene_14125/MQSATVLLFGDQLASKTSAVARLYEIAKARPSLRAFLRDATDVVQCLRQDLHPCERQLYGDFADIRDLTCRHESAEHLNEAVGTTLITIIQLAELLVLAEDEPAILCNENQTHGIGVCIGLLAAAVAATATTARDVVHLGLECIAISFRLGIELWRRTQSVEDSPESWACTFVSIDAEQVQQRLDLFNQGCPSLRTAYIGVEASTWATVFAPPATLKRLLESDHFNQTSTSRLPSAIAVHASHLPALDVARILGSSSLLDTLTSCEGIFSSSTCEPFDATTLRDLLRMVIADIAQLPLYLEDTIKNVANSLQGKANARLLTVGPTHSVALVQRELQRVVPTVNIANITIVDDVLSSEGYSRGSDRVAIVGMSGRFPDSESTSELWDLL…	gene_09146/MQSATVLLFGDQLASKTSAAARLYEIAKTRPSLRAFLRDATDVVQCLRQDLHPCERQLYGDFADIRDLTCQHESAEHLNEAVGTTLITIIQLAELLVLAEDEPAILCNENQTHGIGVCIGLLAAAVAATATTARDVVYLGLECIAISFRLGIELWRRTQCVEDSPESWACTFAVLSLRAAYIGVEASTWATVFAPPATLKRLLESDHFNQTSTSRLPSAIAVHASHLPALDVDRILGSSSLLDTLTRCEGVFSSSTCEPFDATTLRDLLRMVIADIAQLPLYLEDTIKNVASSLQGKANARLLTVGPTHSVALVQRELQRVVPTVNITKITIDDDVPSSEGYSRGSDRVAIVGMSGRFPDSESTSELWDLLLSGRSAHRRIPESRFPI…	gene_15023/MQSATVLLFGDQLASKTSAAARLYEIAKTRPSLRAFLRDATDVVQCLRQDLHPCERQLYGDFADIRDLTCRHESAEHLNEAVGTTLITIIQLAELFVLAEDEPAILCNENQTHGIGVCIGLLAAAVAVTATTARDVVHLGLECIAISFRLGIELWRRTQSVEDSPESWACTFVSIDAKQVQQRLDLFNQGCPSLRTAYIGVEASTWATVFAPPATLKRLLESAHFNQVSTSRLPSAIAVHASHLPALDVDRILGSSSLLDTLTRCEGVFSSSTCEPFDATTLRDLLRMVIADIAQLPLYLEDTIKNVASSLQGKANARLLTVGPTHSVALVQRELQRVVPTVNITKITIDDDVPSSEGYSRGSDRVAIVGMSGRFPDSESTSELWDLL…	gene_11987/MQSATVLLFGDQLASKTSAVARLYEIAKTRPSLRAFLRDATDVVQCLRQDLHPCERQLYGDFADIRDLTCRHESAEHLNEAVGTTLITIIQLAELFVLAEDEPAILCNENQTHGIGVCIGLLAAAVAATATTARDVVHLGLECIAISFRLGIELWRRTQSVEDSPESWACTFVGIDAEQVQQRLDLFNQGCPSLRTAYIGVEASTWATVFAPPATLKRLLESDHFNQTSTSRLPSAIAVHASHLPALDVDRILGSSSLLDTLTSCEGIFSSSTCEPYDATTLRDLLRMVIADIAQLPLYLEDTIKNVASSLQGTGNARLLTVGPTHSVAFVQRELQRVVPTVNIANITIDDDVLSSEGYSRGSDRVAIVGMSGRFPDSESTSELWDLL…		gene_10053/MQSATVLLFGDQLASKTSAVNRLYEIAKTRPSLRAFLRDATDVVQCLRQDLHPCERQLYGDFADIRDLTYRHESAEHLNEAVGTTLITIIQLGELLLLTEDEPTIIQLGELLLLTEDEPTILNADSQTYGIGVCIGLLAAAVAATATTARDVTRLGLECVAISFRLGIELWRRTRSVEDSPESWACTFVGIDAAQVQERLDLFNQDCHRLRAAYIGVQASTWATVFAPPATLKRLMESEHFSQVSTSRLASAIAVHAAHLPILDVDRILGTSPLLDTPARCEGVFSSNTCEPFTASTLRDLLSLIVADIAQHPLYLEETIKNVASSLQGNTNARLLTVGPTHSVSFVQRELQRIVPTVTVSQINIDDENSSEEYRRGSDRVAIVGMSG…	gene_05725/MQSATVLLFGDQLASKTSAVARLYEIAKTRPSLRAFLRDATDVVQCLRQDLHPCERQLYGDFADIRDLTCRHESAEHLNEAVGTTLITIIQLAELLILAEDEPAILSIESQTHGIGVCIGLLAAAVAATATTARDVVRLGLEFVAISFRLGIELWRRTRSVEDSPESWACTFVGIDAAQVQQRLDFFNHGSHRLRTAYIGVEASTWATVFAPPATLERLLDSEHFNQVSTSRLPSAIAVHAAHLPALEVERILGSSSLLDTLTRCEGIFSSSTCEPYDASTLRDLLRVIIADISQLPLYLEETIKNVASSLKGRDNARLLPVGPTHSVSFVQRELQRVIPTVNIDNISVDDDVPNSEGHSRGSDRVAIVGMSGRFPDSESTSELWDLL…	gene_03343/MQSATVLLFGDQLASKTSAVARLYEIAKTRPSLRAFLRDATDVVQCLRQDLHLCERQLYGDFADIRDLSCRHESAEHLNEAVGTTLITIIQLAELLILAEDEPAILSIESQTHGIGVCIGLLAAAVAATATTARDVVRLGLECVAISFRLGIELWRRTRSVEDSPESWACTFVGIDAAQVQQRLDLFNHGSPRLRTAYIGVEASTWATVFAPPATLERLLDSEHFNQVSTSRLPSAIAVHATHLPALEVERILGSSSLLDTLTRCEGIFSSSTCEPYDASTLRDLLRVIIADISQLPLYLEETIKNVASSLKGRDNARLLPVGPTHSVSFVQRELQRVIPTVNIDNISVDSDVPNSEGHSRGSDRVAIVGMSGRFPDSESTSELWDLL…	gene_12689/MQSTAATVLLFGDQLASKTSAVARLYEIAKTRPSLHAFLRDATDVVQCLRQDLYPCERQLYGDFADIRDLTCHHESAEHLNEAVGTTLITIIQLGELLLLAEDEPAVLSAESQTHGIGVCIGLLAAAVATTATTARDVVRLGLECVAISFRLGIELWRRTQSVEDSPESWACTFVGVDAAQVQQRLDLFNQSCPRLRTAYIGVQASTWATVFAPPATLKRLMESEHFSQVSTSRLASATAVHAAHLPVLDVDRILGISPLLDTPTRCEGIFSSSTCEPFDASTLRNLLVLTVADIAQHPLYLEDTIKNVASALQGNESARLFTIGPTHSVSFVQRELQRAVPTVTAANVGIDDDHSSEGYSRGSDRVAIVGMSGRFPDSDSISELWDL…	gene_10885/MRSFAPGRLNHYFRWGGGITSIDTACSASATAIHLACHALLSREVDCAVAGGGHVCVAPELYSGLSKGGFLSQTGPCKTFCDEADGYCRGEAVGVVVLKRLEDAVREKDNILAVLRGTARNSNAGAAGSITFPSSAAQADLYRTILRSNGVGPNEISYVECHGTGTQAGNAAELSAIIDTFSPSRPEDNPLHIGALKAAIGHAEGAAGVSSLIKAILIMQKRVIPPQPNWPFQINHKFPDLDAARIKVADGTVPLRPSRDGNGLSKIIINSFDAAGGNVSMLIEEAPEVSDWRAEDQRPHHVVACSGRTRAGLKANEARLREYLLQHLDTDLASLAYTTTARRMHDLHRSAHVVESVQDLLAKFGTGYKAPLKDAQLAFSFTGQGSVY…	gene_11586/MQSAATVLLFGDQLASKTSAVARLYEIAKTRPSLHAFLRDATDVVQCLRQDLHPAERQLYGDFADIRDLTCHHESAEHLNEAVGTTLITIIQLGELLLIAEDEPAVLSSASQTHGIGVCIGLLAAAVAATATTSRDVVRLGLECVAISFRLGIELWRRTQSVEDSPESWACTFVGIDAAQVQKRLDLFNQSCPRLRTAYIGVQASTWATVFAPPATLKRLMESEHFSQVSTSRLASAIAVHAAHLPVLDVDRILGTSSLLDTPTRCEGIFSSSTCETFDASTLRDLLSLIVADIAQHPLYLEDTIKNVAATLKGNESARLLTVGPTHSVSFVQRELQRAVPTVTVAHVGTDDDGHSSEGYSRGSDRVAIVGMSGRFPDSDSISELWDV…	gene_05470/MQSTAATVLLFGDQLASKTSAVARLYEIAKTRPSLQAFLRDATDVVQCLRQDLYPCERQLYGDFADIRDLTCHHESAEHLNEAVGTTLITIIQLGELLLLAEDEPAVLSAESQTHGIGVCIGLLAAAVAATANTARDVVRLGLECVAISFRLGIELWRRTQSVEDSPESWACTFVGIDAAQVQQRLDLFNQSCPRLRTAYIGVQASTWATVFAPPATLRRLMESEHFSQVSTSRLASAIAVHSTHLPVLDVDRILGTSPLLDTPTPCEGIFSSSTCEPFDASTLRDLLSLIVADIAQNPLYLEDTIKNVATALHGNESARLLTIGPTHSVSFVQRELQRAVPAVTIAHVGIDDDHSSEGYSRGSDRVAIVGMSGRFPDSDSISELWDL…	gene_08109/MRSFAPGRLNHYFRWGGGTTSIDTACSASTTAVHLACNALLSREVDCAVAGGGHVCVAPELYSGLSKGGFLSQTGPCKTFYDDADGYCRGEAVVVVVLKRLEDALREKDNILAVLRGTARNTNAGAAGSITFPSSAAQADLYRTILQSNGVGSNEISYVECHGTGTQADDAAELCASIDTFSASRPSDFPLHIGALKAAIGHAEGAAGVSSLIKAILIMQKRIIPPQPNWPFKINHKFPDLEVAHIKVADGTDPLRPSRDGNGLAKIIVNSFDAAGGNVSMLIEEAPEVSEWRAQDQRPHHVVACSGRTRSSLEANEARLKEYLLQHPDTDLASLAYTTTARRMHELHRSAHVVESVQDLLGKFGTAYKAPLKDEQLVFSFTGQGSVY…	gene_09487/MQSATVLLFGDQLASKASAVARLYDLAKTRPSLHAFLRDATDVVQCLRQDLHLCERQLYGDFADIRDLSCRHESAEHLNEAVGTTLITIIQLGELLLLAEDEPSILHAESQTHEIGVCIGLLAAAVAATATTARDVVRLGLECVAISFRLGIELWRRTRSVEDSPESWACTLVGIDAAQVQQRLDLFNHGCPRLRTAYIGVQASTWATVFAPPATLKRLLDSEHFSQASTSRLPSAIAVHAAHLPALDVDRILGNSSLLDTHTCCEGLFSSSTCEPFAASTLRDLLHLIIADIAQHPLYLEETVKNVANSLQGQDNARLLTVGPTHSVSFVQRELQRVVPTVTTAHISVDDAPSSEGYSRGSDRVAIVGMSGRFPDSDSTSELWDLLL…	gene_14980/MKSATVLLFGDQLASKTSAVNRLYEIAKTRPSLHAFLRDATDVVQCLRQDLHPCERQLYGDFADVRDLTCRHEAAEHLNEAVGTTLITIIQLGELLQLAEDEPAILHAESQTHGIGVCIGLLAAAVAATATTARDVVRLGLECVAISFRLGIELWRRTRSVEDSPESWACTFVGIDAAQVQERLDLFNRDCPRLRAAYVGVQASTWATVFAPPATLKRLMDSEHFSQVSTSRLASAIAVHAAHLPLLDTDRILGISLLLDTPARCEGIFSSSTCEPFAASTLRDLLSLIIADIAQHPLYLEDTIKNVASSLQGISNARLLTVGPTHSVSFVQRELQRIVPTVTVSHINIDDEYSSNEYRRGSDRVAIVGMSGRFPDSDSVSELWELLL…			gene_15263/MQSATVLLFGDQLASKTSAAARLYEIAKTRPSLRAFLRDATDVVQCLRQDLHPCERQLYGDFADIRDLTCRHESAEHLNEAVGTTLITIIQLAELLVLAEDEPAILCNENQTHGIGVCIGLLAAAVAATATTARDVVHLGLECIAISFRLGIELWRRTQSVEDSPESWACTFVGIDAEQVQQRLDLFNHGCPSLRAAYIGVEASTWATVFAPPATLKRLLESDHFNQTSTSRLPSAIAVHASHLPALDVDRILGSSSLLDTLTSCEGIFSSSTCEPYDAITLRDLLRMVIADIAQLPLYLEDTIKNVASSLQGTGNARLLTVGPTHSVAFVQRELQRVVPTVNIAHITIDDDVLSSEGYSRGSDRVAIVGMSGRFPDSESTSELWDLL…
PKS14	gene_06080/MMLEQECMLPNANFEKLNPDIVNDGRLKVTFLQASIDYTESVAEQRGDGQVLTRPLPWPSDAKRRICVTNFGKQRTCRFFSSSIHVDKQYPLGFGGSNAAVLLERAPQAQTYGIHNPMVNGVSHQVGRVISDGDTNSDHALSNTVSPSRNTKDKLFVLSAKSATSLEAYVSSLAGYLEHRSTSSQFKFLLDLSYTLSHRRTHFPRHRLAVSADSLTSLLDQLRSVRLNTISAESLDGNIAFIFTGQGAQYFRMASGLEQYGAFSNAIKQADSFLGELGAPWSLTEELARSQGESRVNDAEISQPACTVIQLGLIVLLQSWGISPVAVVGHSSGEIAAAFAAKLISFEAAIAISYFRGVAVNNIILDGLEQGAMLAVGSSAEETTKLIE…	gene_02725/MPLAVVGYAYRAPGVGRKGLWEFLADAKSAWSEVPADRFNKDAFYHAGDKPGFFSSEGGHFLPDDVYAFDASFFNIKAEEARSLDPQTRFILECAFEAAESAGLTLPELAGANMGVFAQATFSDYSMRLMEDLQTKNKYAGLGISQSLVANRLSYFFGLTGPSVAVDAACAGTTYALHQACQSLRTGECAAALVAAGSIISGPEMWVALASLGYDTYAGSSPGSEGKSFAYDSRAAGFGRGEGGGCLIIKPLADAVSHGDPIRAIIRGTACNHSGRSKGITMPSQTAQEQLLVKLHESAGLDPRDTAFVEGHGTGTKAGDPIDAGAIAAVVAKEASSSNPTYIGSVKSNFGSVLVISNDVLRHLEGASGMVSVIKSIMMLEQDCMLPN…	gene_15439/MMESNTPLAVVGYAYRAPGVGRKGLWEFLADAKSAWSEVPADRFNKDAFYHAGDKPGFFPSEGGHFLPDDVYAFDASFFNIKAEEARSLDPQTRLVLECAFEAAESAGLTLPELAGANIGVFAQAGFSEYSMRLVEDLQTINKYAGLGISQSLIPNRLSYFFGLTGPSVAVDAACAGTTYALHQACQSLRNGECSAALVAAGSIISGPEMWVGLASLGAISPEGKCFSYDSRAAGFGRGEGGGCLIIKPLADAIACGDPVRAVIRGTACNHSGRSKGITMPSQPAQERLLTTLHDNAKLDPRDTIFVEGHGTGTKAGDPIDAGAIAAVVAKEASPNRPTYIGSAKSNFGHLEGASGMVSVIKAMMMLEQECMLPNANFEEFNPGIVND…	gene_06081/MMESNTPLAVVGYAYRAPGVGRKGLWEFLADAKSAWSEVPADRFNKDAFYHAGDKPGFFPSEGGHFLPDDVYAFDASFFNIKAEEARSLDPQTRLVLECAFEAVESAGLTLPELAGANIGVFAQAGFSEYSMRLVEDLQTINKYAGLGISQSLIPNRLSYFFGLTGPSVAVDAACAGTTYALHQACQSLRNGECSAALVAAGSIISGPEMWVGLASLGAISPEGKCFSYDSRAAGFGRGEGGGCLIIKPLADAIACGDPVRAVIRGTACNHSGRSKGITMPSQPAQERLLTTLHDNAKLDPRDTIFVEGHGTGTKAGDPIDAGAIAAVVAKEASSSRPTYIGSVKSNFGHLEGASGMVSVIKAMMMLEQECMLPNANFEEFNPGIMND…	gene_09647/MMESNTPLAVVGYAYRAPGVGRKGLWEFLADAKSAWSEVPADRFNKDAFYHAGDKPGFFPSEGGHFLPDDVYAFDASFFNIKAEEARSLDPQTRLVLECAFEAVESAGLTLPELAGANIGVFAQAGFSEYSMRLVEDLQTINKYAGLGISQSLIPNRLSYFFGLTGPSVAVDAACAGTTYALHQACQSLRNGECSAALVAAGSIISGPEMWVGLASLGAISPEGKCFSYDSRAAGFGRGEGGGCLIIKPLADAIACGDPVRAVIRGTACNHSGRSKGITMPSQPAQERLLTTLHDNAKLDPRDTIFVEGHGTGTKAGDPIDAGAIAAVVAKEASSSRPTYIGSAKSNFGHLEGASGMVSVIKAMMMLEQECMLPNANFEEFNPGIVND…	gene_11823/MMESNTPLAVVGYAYRAPGVGRKGLWEFLADAKSAWSEVPADRFNKDAFYHAGDKPGFFPSEGGHFLPDDVYAFDASFFNIKAEEARSLDPQTRLVLECAFEAAESAGLTLPELAGANIGVFAQAGFSEYSMRLVEDLQTINKYAGLGISQSLIPNRLSYFFGLTGPSVAVDAACAGTTYALHQACQSLRNGECSAALVAAGSIISGPEMWVGLASLGAISPEGKCFSYDSRAAGFGRGEGGGCLIIKPLADAIACGDPPAQERLLTTLHDNAKLDPRDTIFVEGHGTGTKAGDPIDAGAIAAVVAKEASPNRPTYIGSAKSNFGHLEGASGMVSVIKAMMMLEQECMLPNANFEEFNPGIVNDGRLKVLTKPLPWPSDAIRRVCVTN…	gene_06537/MPSQPAQERLLTTLHDNAKLDPRDTIFVEGHGTGTKAGDPIDAGAIAAVVAKEASPNRPTYIGSAKSNFGHLEGASGMVSVIKAMMMLEQECMLPNANFEEFNPGIVNDGRLKVLTKPLPWPSDAIRRVCVTNFGFGGSNAAVLLERAPQAQTSGFHAPLVNGISKKAVEVITNGDATPDHALPSRTSNEKLFVVSAKSATSLEAYISSLAAYLEHQPTSTQFLQDLSYTLSQRRTLFPRHRLAISAESMGSLVEQLRSARSGNKTPETLDSNVAFIFTGQGAQYFQMASGLEQYEAFYSAIKRAELFLTELGAPWSLTEELSRPQGESRVDDAEISQPACTAIQLALIVLLQSWGISPAAVVGHSSGEIAAAFAARLISFEAAIAIS…			gene_11966/MTMDSSTPLAVVGYAYRAPGVGRKGLWEFLAEAKSAWSEVPADRFSKDAFYHAGEKPGFYPSEGGHFLPDDVYAFDASFFNIKAEEARSLDPQTRLVLECAFEAAESAGLTLPEMAGANIGVFAQATFSDYSMRLVEDLQTTNKYAGLGISQSLVANRLSYFFGLTGPSVAVDAACAGTTYALHQACQSLRAGECAAALVAAGSVISGPEMWVALASIGALSPEGKSFAYDSRATGFGRGEGGGCLVIKPLADALACGDPVRAVIRGTTCNHSGRTKGITMPSQVAQERLLVQLHASAGLDPRDTAFVEGHGTGTRAGDPIDAGAIAAVVAKEASSSNPIYIGSAKSNFGHLEGASGMVSVIKSIMMLEQECMLPNANFEEFNPDIVN…	gene_07540/MTMDSSTPLAVVGYAYRAPGVGRKGLWEFLAEAKSAWSEVPADRFSKDAFYHAGEKPGFYPSEGGHFLPDDVYAFDASFFNIKAEEARSLDPQTRLVLECAFEAAESAGLTLPEMAGANIGVFAQATFSDYSMRLVEDLQTTNKYAGLGISQSLVANRLSYFFGLTGPSVAVDAACAGTTYALHQACQSLRAGECAAALVAAGSVISGPEMWVALASIGALSPEGKSFAYDSRATGFGRGEGGGCLVIKPLADALACGDPVRAVIRGTTCNHSGRTKGITMPSQVAQERLLVQLHASAGLDPRDTAFVEGHGTGTRAGDPIDAGAIAAVVAKEASSSNPIYIGSAKSNFGHLEGASGMVSVIKSIMMLEQECMLPNANFEEFNPDIVN…	gene_10475/MDPTAPLAVVGYAYRAPGVGRKGLWEFLAEAKSAWSQGAPADRFNHEAFYHPENKSGFHNSQGGHFLPDDIYAFDASFFNIKAEEARSIDPETRLVLECAFEAAESAGLTLPALAGANVGVFAQATFSDYSARLAEDLATANKYAALGLSPALTANRLSYFFGLTGPSLAVDAACAGSTYAIHQACHSLRAGECAAALVVAGSVVSGPEMWVSLAAIGALSPEGKSFAYDSRASGFGRGEGGGCLIIKPLSDAIACGDPVRAIIRSSACNHSGRTQGITMPSQMAQQRLLARLHESVGLDPGDTAFVEGHGTGTKAGDPIDAGAVMNVIANSTAHKDMTYIGSAKSNFGHLEGASGLISVVKAVMMLEKQRMLPNANFEKFNPEIAHN…	gene_06524/MDPTAPLAVVGYAYRAPGVGRKGLREFLAEAKSAWSQGAPADRFNHEAFYHPENKSGFHNSQGGHFLPDDIYAFDASFFNIKAEEARSIDPETRLVLECAFEAAESAGLTLPALAGANVGVFAQATFSDYSARLAEDLATANKYAALGLSPALTANRLSYFFGLTGPSLAVDAACAGSTYAIHQACHSLRAGECAAALVVAGERRLGAGDVGFVGGDWVKGKSFAYDSRASGFGRGEGGGCLIIKPLSDAIACGDPVRAIIRSSACNHSGRTQGITMPSQMAQQRLLARLHESVGLDPGDTAFVEGHGTGTKAGDPIDAGAVMNVIANSTAHKDMTYIGSAKSNFGHLEGASGLISVVKAVMMLEKQRMLPNANFEKFNPEIAHNGRL…	gene_03115/MDSKAPLAIVGYAYRAPGVGRKGLWEFLADAKSAWSQVPPDRFRQEAFYQPSTKPGFYNSQGGHFLPEDIYAFDASFFNIKADEARSLDPQTRLVLECAFEAVESAGLTLPGLAGTNVGVFAQTSFSDYSTRLTEDLQTSNKYAALGLSPALVANRLSYFLGVTGPSMSVDAACAGSTYAIHQACQSIRAGECSAAIIGAANIISGPEMWIALAAIGALSPEGKSFAYDSKASGFGRGEGGGCLIIKPLSDAIACGDPVRAVIRSSVCNHSGRTQGITMPSQTAQEQLLTSLHESVGLDAVDTTFVEGHGTGTKAGDPIDAGAITAVIAKVKGHRDTTYIGSAKSNFGHLEGASGFLSVVKAIMMLEQQYLLPNANFEEFNPEIANDG…	gene_08920/MDPTAPLAVVGYAYRAPGVGRKGLWEFLAEAKSAWSQGVPTDRFNHEAFYHSNTKPGFHNSQGGHFLPDDIYAFDASFFNIKAEEARSIDPETRLVLECAFEAAESAGRRVPGEPLLTSRASHSLTLPALAGANVGVFAQATFSDYSARLTEDLATANKYAALGLSPALTANRLSYFFGLTGPSLSIDAACAGSTYAIHQACHSLRAGECAAALVAAGSVVSGPEMWTVRSALSPEGKSFAYDSRASGFGRGEGGGCLIIKPLADAIACGDPVRAIIRSSACNHSGRTQGITMPSQMAQQRLLARLHESVGLDPGDTAFVEGHGTGTKAGDPIDAGAVMNVIANSTAHKDTTYIGSAKSNFGHLEGASGLISVVKAVMMLEKQRMLPN…	gene_05200/MDPNPPLAVVGYAYRAPGVGRKGLWEFLADAKSAYSQIPPDRFNKDVSHHTSGKPGFFPSEGGHFLPDDVYAFDALFFNIKAEEARSLDPQTRLMLDSKAVHTPSKNHTRMRLTNHQCRQDDAAGVGWRRYRSFCQATFSDYSMRLMEDLQTANRYAGLGISQSLVANRLSYFFGFIGPSVSVDAACAGTTYALHQACQSVRASDCSAALVGAASIISGPEMWVALAALGALSPEGKSFSYDSRAAGFGRGEGGGYLIVKPLSDAVGRGDPVRAIIRGTACNHSGQSKGITMPSQAAQERLLVKLHESAGLSPRDTTFVEGHGTGTQAGDPIDAGAIAAVVAKEASSSNPTYLGSVKSNFGHLEGASGLVSVVKAIMMLEQECLLPNA…		gene_11657/MDPNTPLAIVGYAYRAPGVERKGLWEFLADAKSAFSEIPSDRFNKDAFRHISGKAGFFPSEGGHFLPDDVYAFDASFFNIKAEEARSLDPSTRLMLECAFEAAESAGLTLPELAGANIGVFAQATFSDYSMRLMEDLQTANKYAGLGISQSLVANRLSYFFGLTGPSVSVDAACAGTTYALHQACQSVRAGDCSAALVGAASIISGPEMWVALAALGALSPEGKSFSYDSRAAGFGRGEGGGCLIIKPLSDAIARGDPVRAVIRGTACNHSGRSKGITMPSQAAQERLLVKLHDSLGLNPRDTTFVEGHGTGTQAGDPIDAGAIAAVVAKESSSASPTYLGHLEGASGLVSVVKAIMMLEQECLLPNANFEKFNPSIVDDGRLKVLMK…			gene_02724/MMESNTPLAVVGYAYRAPGVGRKGLWEFLADAKSAWSEVPADRFNKDAFYHAGDKPGFFPSEGGHFLPDDVYAFDASFFNIKAEEARSLDPQTRLVLECAFEAAESAGLTLPELAGANIGVFAQAGFSEYSMRLVEDLQTINKYAGLGISQSLIPNRLSYFFGLTGPSVAVDAACAGTTYALHQACQSLRNGECSAALVAAGSIISGPEMWVGLASLGAISPEGKCFSYDSRAAGFGRGEGGGCLIIKPLADAIACGDPVRAVIRGTACNHSGRSKGITMPSQPAQERLLTTLHDNAKLDPRDTIFVEGHGTGTKAGDPIDAGAIAAVVAKEASPNRPTYIGSAKSNFGHLEGASGMVSVIKAMMMLEQECMLPNANFEEFNPGIVND…
PKS15			gene_04472/MEADKTTPIAIIGMNLKFPGDAVSAQAFWELVMSARNVSKEIPADRFNIDGMLSLSEGVAQLRIRHAHFMEEDPRSFDAPFFNMSYAEASVLDPQQRGLLEGAYRTFENAGIPMESLSRSPTSVYCASFSRDGETITGRDFSAQSRYHATANGSSMLSNRISHFFDLAGPSLTVDTACSSGLYALHLGVQSILAGESAMSLVCGANTFITPESQALALSNGGFLSPDGKSYSFDAKANGYARGEGFGFVLLKPLDAALRDGDVVRAVIRATGANQDGRTPSITQPSEQAQLDLLRDTYRVAGLDVAGTDYVEAHGTGTPVGDPIEAAAVGQAFRDGRKLDRPLYMGSVKANIGHLEGASGMAGVIKAVLALEKAVIPPLALFEKANPA…	gene_10597/MEADKTTPIAIIGMNLKFPAFYHPDPNRLDSLRIRHAHFMEEDPRSFDAPFFNMSYAEASVLDPQQRGLLEGAYRTFENAGIPMESLSRSPTSVYCASFSRDGETITGRDFSAQSRYHATANGSSMLSNRISHFFDLAGPSLTVDTACSSGLYALHLGVQSILAGESAMSLVCGANTFITPESQALALSNGGFLSPDGKSYSFDAKANGYARGEGFGFVLLKPLDAALRDGDVVRAVIRATGANQDGRTPSITQPSEQAQLDLLRDTYRVAGLDVADTDYVEAHGTGTPVGDPIEAAAVGQAFRDGRKLDRPLYMGSVKANIGHLEGASGMAGVIKAVLALEKAVIPPLALFEQANPAIDVAGLQLAFPNEAVPWPAADVRRASVSSF…	gene_10881/MEADKTTPIAIIGMNLKFPGDAISAQAFWELVMSARNVSKEIPTDRFNIDGMSSLSEGVAQAGVIKAVLALEKAVIPPLALFEKANPAIDVAGLQLAFPQKAVPWPVTDVRRASVSSFGYGGSNAHVILDDAYNYLRSHGLKGLHQSAGEATSTNGHTNGHTNGNGALSSTNPYAIIPFSAADSDGTKRQTEALQTFLSSSNRAAGTANFLSNLAYTLSSHRSLLNFRSFAVVSSLNDDLTAVTTPSIFASASSAPDLSFVFTGQGAQYARMATGLLHYPVFRQSLADCDTYLSSTLGSTWSVPEELEKDKEASKVAEPALSQPLCTAIQIALVDLLRTWGVVPRSVVGHSSGEVAAAYCAGGLDRESAWRVAYFRGVVADKLASDPA…	gene_08866/TAVMEADKTTPIAIIGMNLKFPGDAVSAQAFWELVMSARNVSKEIPADRFNIDGMSSLSEGVAQLRIRHAHFMEEDPRSFDAPFFNMSYAEASVLDPQQRGLLEGAYRTFENAGIPMESLSRSPTSVYCASFSRDGETITGRDFSAQSRYHATANGSSMLSNRISHFFDLAGPSLTVDTACSSGLYALHLGVQSILAGESAMSLVCGANTFITPESQALALSNGGFLSPDGKSYSFDAKANGYARGEGFGFVLLKPLDAALRDGDVVRAVIRATGANQDGRTPSITQPSEQAQLDLLRDTYRVAGLDVADTDYVEAHGTGTPVGDPIEAAAVGQAFRDGRKLDRPLYMGSVKANIGHLEGASGMAGVIKAVLALEKAVIPPLALFEKA…	gene_10820/MEADKTTPIAIIGMNLKFPGD14AVSAQAFWELVMSARNVSKEIPADRFNIDGMLSLSEGVAQAGVIKAVLALEKAVIPPLALFEKANPAIDVEGLQLAFPQKAVPWPVTDVRRASVSSFGYGGSNAHVILDDAYNYLRSHGLKGLHQSVGEATPTNGHTNGHTNGNGALSSTNPYAIIPFSAADSDGTKRQAEALQTFLSSSNGAAGTANFLSNLAYTLSSHRSLLNFRSFAVVSSLNDDLTAVTTPSIFASASSAPDLSFVFTGQGAQYARMATGLLHYPVFRQSLADCDTYLSSTLGSTWSVLEELEKDKDTSKVAEPALSQPLCTAIQIALIDLLRTWSVVPRSVVGHSSGEVAAAYCAGGLDRESAWRVAYFRGVVADKLASD…		gene_02516/MATADKTTPIVIIGMNLKFPGDAVSAQAFWELVMSARNVSKEIPADRFNIDAFYHPDPNRLDSLRIRHAHFMEEDPRSFDAPFFNMSYAEASVLDPQQRGLLEGAYRTFENAGILMESLSRSATSVYCASFSRDGETMTGRDFSAQSRYHATANGSSMLSNRISHFFDLAGPSLTVDTACSSGLYALHLGAQSILAGESKMSLVCGANTFITPESQALALSNGGFLSPDGRSYSFDTKANGYARGEGFGFVLLKPLDSALRDGDVVRAVIRATGANQDGRTPSITQPSQQAQLDLLRDTYRVAGLEVADTDYVEAHGTGTPVGDPIEAAAVGQAFRDGRKADRPLYMGSVKANIGHLEGASGMAGVIKAVLSLEKAVIPPIALFEKAN…	gene_14020/MAATDKTMPIAIIGMNMKFPGDAVSAQAFWELVMGARNVSKEIPADRFNIDAFYHPDPNRLDSLRIRHAHFMEEDPRSFDAPFFNMSYAEASVLDPQQRGLLEGAYRTFENAGIPMESLSRSPTSVYCASFSRDGETMTGRDFAAQSRYHATANGSSMLSNRISHFFDLAGPSLTVDTACSSGLYALHLGVQSILAGESAMSLVCGANTFITPESQALALSNGGFLSVDGRSYSFDAKANGYARGEGFGFVLLKPLDAALRDGDIVRAVIRATGANQDGRTPSITQPSQQAQLDLLRDTYRVAGLDVADTDYVEAHGTGTPVGDPIEAAAVGQAFRDGRRSDRPLYMGSVKANIGHLEGASGMAGVIKAVLALENAVIPPIAMFDKAN…	gene_04319/MAATDKTMPIAIIGMNMKLPGDAVSAQAFWELVMGARNVSKEIPADRFNIDGMSSLSTGLRIRHAHFMEEDPRSFDAPFFNMSYAEASVLDPQQRGLLEGAYRTFENAGIPMESLSRSPTSVYCASFSRDGETMTGRDFAAQSRYHATANGSSMLSNRISHFFDLAGPSLTVDTACSSGLYALHLGVQSILAGESAMSLVCGANTFITPESQALALSNGGFLSVDGPSYSFDAKANGYARGEGFGFVLLKPLDAALRDGDIVRAVIRATGANQDGRTPSITQPSQQAQLDLLRDTYRVAGLDVADTDYVEAHGTGTPVGDPIEAAAVGQAFRDGRRSDRPLYMGSVKANIGHLEGASGMAGVIKAVLALENAVIPPIAMFDKANPAID…	gene_11624/MAADKTMPIAIIGMNLKFPGDAVSAQAFWELIMSARDVSKEIPADRFNIDAFYHPDPNRLDSLRIRHAHFMEEDPRSFDAPFFNMSYAEASVLDPQQRGLLEGAYRTFENAGIPMERLSRSPTSVYCASFSRDGETMTGRDFSAQSRYHATANGSSMLSNRVSHFFDLAGPSLTVDTACSSGLYALHLGVQSIVTGESGMSLVCGANTFITPESQALALSNGGFLSPDGRSYSFDAKANGYARGEGFGFVLLKPLAAALRDGDVVRAVIRATGANQDGRTPSITQPSQQAQLDLLRDTYRVAGLEVRDTDYVEAHGTGTPVGDPIEAAAVGQAFRDGRRADRPLYVGSVKANIGHLEGASGMAGVIKAVLALENAVIPPLAMFEKANP…	gene_16100/MAADKTMPIAIIGMNLKFPGDAVSAQAFWELIMSARDVSKEIPADRFNIDAFYHPDPNRLDSLRIRHAHFMEEDPRSFDAPFFNMSYAEASVLDPQQRGLLEGAYRTFENAGIPMERLSRSPTSVYCASFSRDGETMTGRDFSAQSRYHATANGSSMLSNRVSHFFDLAGPSLTVDTACSSGLYALHLGVQSIVTGESEMSLVCGANTFITPESQALALSNGGFLSPDGRSYSFDAKANGYARGEGFGFVLLKPLAAALRDGDVVRAVIRATGANQDGRTPSITQPSQQAQLDLLRDTYRVAGLEVRDTDYVEAHGTGTPVGDPIEAAAVGQAFRDGRRADRPLYVGSVKANIGHLEGASGMAGVIKAVLALENAVIPPLAMFEKANP…	gene_10439/MAADKTTPIAIIGMNLKFPGDAVSAQAFWELVMSARNVSKEIPADRFNIDGMLILSQLRIRHAHFMEEDPRSFDAPFFQMSYAEASVLDPQQRGLLEGAYRTFENAGIPMESLSRSATSVYCASFSRDGETMTGRDFSAQSRYHATANGSSMLSNRVSHFFDLAGPSLTVDTACSSGLYALHLGVQSIVAGESEMSLVCGANTFITPESQALALSNGGFLSPDGKSYSFDHKANGYARGEGFGFVLLKPLDAALRDGDMVRAVIRATGANQDGRTPSITQPSQQAQLDLLRDTYRLAGLEVKHTDFVEAHGTGTPVGDPIEAGAVGQAFRDGRSADRPLYMGSVKANIGHLEGASGMAGVIKAVVALENAVIPPLAMFEEANPAIDVA…	gene_15816/MAADKTMPIAIIGMNLKFPGDAVSAQAFWELVMSARNVSKEIPADRFNIDAFYHPDPNRLDSLRIRHAHFMEEDPRSFDAPFFNMSYAEASVLDPQQRGLLEGAYRTFENAGIPMESLSRSPTSVYCASFSRDGETMTGRDFSAQSRYHATANGSSMLSNRVSHFFDLAGPSLTVDTACSSGLYALHLGVQSIVTGESEMSLVCGANTFITPESQALALSNGGFLSPDGKSYSFDAKANGYARGEGFGFVLLKPLAAALRDGDVVRAVIRATGANQDGRTPSITQPSQQAQLDLLRDTYRVAGLEVRDTDYVEAHGTGTPVGDPIEAAAVGQAFRDGRRVDRPLYMGSVKANIGHLEGASGMAGVIKAVLALENAVIPPLAMFEKANP…		gene_11407/MATDKTTPIAIIGMNMKFPGDAVSAQSFWELVMSARNVSKEIPADRFNIDGTVSWNHDFCYVQMGFADSRQLRIRHAHFMEEDPRSFDAPFFNMSYAEASVLDPQQRGLLEGAYRTFENAGVPMESLPRSATSVYCASFSRDGETITGRDFAAQSRYHATANGSSMLSNRVSHFFDLAGPSLTVDTACSSGLYALHLGVQSILAGESAMSLVCGANTFITPESQALALSNGGFLSVDGRSYSFDAKANGYARGEGFGFVLLKPLDAALRDGDVVRAVIRATGANQDGRTPSITQPSQQAQLDLLRDTYRVAGLDVADTDYVEAHGTGTPVGDPIEAAAVGQAFRDGRKSDRPLYMGSVKANIGHLEGASGMAGVIKAVLALEKAVIPP…		gene_06318/MAADKTMPIAIIGMNLKFPGDAVSAQAFWELVMSARNVSKEIPADRFNIDAFYHPDPNRLDSLRIRHAHFMEEDPRSFDAPFFQMSYAEASVLDPQQRGLLEGAYRTFENAGVPMESLARSATSVYCASFSRDGETMTGRDFSAQSRYHATANGSSMLSNRVSHFFDLAGPSLTVDTACSSGLYALHLGVQSIVAGESEMSLVCGANTFITPESQALALSNGGFLSPDGKSYSFDHKANGYARGEGFGFVLLKPLDAALRDGDVVRAVIRATGANQDGRTPSITQPSQQAQLDLLRDTYRLAGLEVKDTDFVEAHGTGTPVGDPIEAGAVGQAFRDGRGADRPLYMGSVKANIGHLEGASGMAGVIKAVLALENAVIPPLAMFEEANP…	gene_02069/MAADKTMPIAIIGMNLKFPGDAVSAQAFWELVMSARNVSKEIPADRFNIDGMYSLSKRASIALLTRTPQLSTTPTRTLRIRHAHFMEEDPRSFDAPFFQMSYAEASVLDPQQRGLLEGAYRTFENAGVPMESLSRSATSVYCASFSRDGETMTGRDFSAQSRYHATANGSSMLSNRVSHFFDLAGPSLTVDTACSSGLYALHLGVQSIVAGESEMSLVCGANTFITPESQALALSNGGFLSPDGKSYSFDHKANGYARGEGFGFVLLKPLDAALRDGDVVRAVIRATGANQDGRTPSITQPSQQAQLDLLRDTYRLAGLEVKDTDFVEAHGTGTPVGDPIEAGAVGQAFRDGRGADRPLYMGSVKANIGHLEGASGMAGVIKAVLALE…	gene_05921/MEADKTTPIAIIGMNLKFPAFYHPDPNRLDSAGVIKAVLALEKAVIPPLALFEQANPAIDVAGLQLAFPKEAVPWPAADVRRASVSSFGYGGSNAHVILDDAYNYLRSHGLNGLHQSVGKTTPTNGHTNGHTNGNGALSSTSPYAIIPFSAADSDGTKRQAEVLQTFLSSSNGAAGTANFLSNLAYTLSSHRSLLNFRSFAVVSSLADDLTTLVTPSHFTSASSAPDLSFVFTGQGAQYARMATGLLHYPIFRQSLADCDAYLSSTLGSTWSVLEELEKDKEASKVAEPALSQPLCTAIQIALVDLLRTWGVVPRSVVGHSSGEVAAAYCAGGLDRESAWRVAYFRGVVADKLAADPAREATTMMSVGLGKADVQSYLKAEPAVTVAC…
PKS16	gene_08834/MEPKDDDIAIIGLSCRFAGDARDVNGYWDLLSQGKSAFSPKARFDGDGTASSHPGYYLQGDVYQFDASFFGISPKEVKGMDPSQRLMLEVAYEAFESAGLTLEAVSGSNTSVYAAQWACDYRDMLARDLENAPTYAATGTGTTLLSNRLSWFFDLRGPSLTVNTACSSSLVALHAACEGLRRGESDMALVAGANVILCEDMFTYLGMQNFLSTSGKCKSFDATGDGYGRGEGVAAILLKRMPAAVEDSSSPIRAVIRGTGVNQNGRMKGITLPSVDAQVALIQKTYQSAGLPVTETAYVDAHGTGTQAGDPVELEAIGKAIAQARGADSGKKVIVGSGKAGIGHTEASAGLASVIRSVLILESGLIPPNIYLTQLNPNLRLDEWNLKI…	gene_12155/MSQSKQAMDDAGLCFVFTGQGAQWSRMGQELYQESAGFRASIDAADQYFRDILHCSWSVIEELFRDDSTSCIDQHDFSQPLTTVLQMGLVDLLQEWNIKPDWIIGHSSGEIAGAYCLGALTQHNAWKVSYSCGAFESEREGSMMAVGLSEIEADSIISQHASTGSVVVACINSPANVTLAGDSASLDDLEKLLHSRGIFSQRLRVDVAYHSSHMQAMATNYQQAISEIVTGEGTQGRTMFSAVTGEEIHASEFGPAYWGKNIASQVRFSDAVTNLLTSFPTRDKIFVEIGPHHTMQLPLKQILTNYSGPSSEYVSLLSRGKDSVTTAYMASGQMYALGVPVALTELNKTETERRPQLIVDLPPYSWRHEDTYNAVETVAVELRSHNEP…	gene_01458/MEPKDDDIAIIGLSCRFAGDAKDVNGYWDLLSQGKSAFSPKARFDGDGAASSHPGYYLQDDVYQFDAAFFGISPKEAKGMDPSQRLMLEVAYEAFESAGLTLETVAGSNTSVYAAQWTCDYRDMLARNLPSAPTYAATGTGTTLLSNRLSWFFDLRGPSLTINTACSSSLVALHVACESLRRGESDMALVAGANVILCEDMFTYLGMQNFLSTSGKCKSFDAAGDGYGRGEGIAAILLKRMPAAVEDHISPIRAVIRGTGVNQNGRMKGITLPSVDAQVALMQKTYRSAGLPVTETAYVDAHGTGTQAGDPVELEAIGRAIAQARGADSGKKVMVGSGKASIGHTEASAGLASVIRSVLILESGLIPPNIYLTQLNPNLRLDEWNLEI…	gene_14128/MEPKDDDIAIIGLSCRFAGDAKDVNGYWDLLSQGKSAFSPKARFDGNGTASSSHPGYYLQDDVYQFDAAFFGISPKEAKGMDPSQRLMLEVAYEAFESAGITLETVAGSNTSVYAAQWTCDYRDMLARNLPGAPTYAATGTGTTLLSNRLSWFFDLRGPSLTVNTACSSSLVAVHEACEGLRRGEADMALVAGANVILCEDMFTYLGMQNFLSTSGKCKSFDATGDGYGRGEGVAAILLRRMPAAVEDHVSPIRAVIRGTGVNQNGRMKGITLPSVDAQVALMQKTYRSAGLPVTETAYVDAHGTGTQAGDPVELEAIGRAIAQARGADSGKKVMVGSGKAGIGHTEASAGLASVIRSILILESGMIPPNIYLTQLNPNLQLDEWNLE…	gene_09148/MEEEVEADTETEILADLAYTLNQRRTHFTWRTSIAASSISELKAAVETAAGKSFMSHGKQTMDEAGLCFVFTGQGAQWPRMGQELYLESATFRASIDTADRYFRDVLHCSWSVADELFRDETKSRVDQHAFSQPLTTVLQMGLVDLLQEWNIKPDWIIGHSSGEIAGAYCLGALTRHDAWKIAYSCGAFESEQEGSMMAVGISKSEADSIISEHAPSGGVVVACINSPTNVTLAGGSASLDDLEKLLHGRGIFSQRLRVDVAYHSSHMEAMVAAYHQAISQIVLDEAVPARTMFSAVTGEEICAHELGPAYWGKNIASQVRFSDAVKNLITSFPTRNKIFVEIGPHHTMQLPLKQILTRCSTPLGTSTEYVYLLSRGKDSAATAYAAA…	gene_15025/MEPKDDDIAIIGLSCRFAGDAKDVNGYWDLLSQGKSAFSPKARFDGDGTASSSHPGYYLQDDVYQFDASFFGISPKEAKGMDPSQRLMLEVAYEAFESAGLTLETVAGSNTSVYAAQWTCDYRDMLARNLPSAPTYAATGTGTTLLSNRLSWFFDLRGPSLTVNTACSSSLVALHEACEGLRRGEADMALVAGANVILCEDMFTYLGMQNFLSTSGKCKSFDAAGDGYGRGEGVAAILLRRMPAAVEDHVSPIRAVIRGTGVNQNGRMKGITLPSVDAQVALMQKTYRSAGLPVTETAYVDAHGTGTKAGDPVELEAIGRAIAQARGADSGKKVMVGSGKAGIGHTEASAGLASVIRSILILESGMIPPNIYLTQLNPNLRLDEWYLE…	gene_11985/MNQRRSHFTWRTSITASSISELKVAAETAAGKSVTSHGKQTMDDAGLCFVFTGQGAQWPRMGQELYLDSATFRSSIDAADRYFRDVLYCSWSVVDELFRDEAKSRIDQHAFSQPLTTVLQMGLVDLLQEWKIKPDWIIGHSSGEIAGAYCLGALTRHDAWKIAYSCGAFESEQEGSMMAVGISKSEADSIISEHAPSGGVVVACINSPTNVTLAGDSASLDDLEKLLHGRGIFSQRLRVDVAYHSSHMEAMVAAYKQAISQIVLDEAVPARTMFSAVTGEEICAHELGPAYWSKNIASQVRFSDAVKNLITSFPTRNKIFVEIGPHHTMQLPLKQILTRSSTPPGTSTEYVYFLSRGKDSATTAYAAAGQLHSLGVPVSLSRLNEAGT…		gene_10051/MASEVDIAIVGLSCRFAGDAKDVNGYWDHLRQGKSAFSPRARFDDAASSSSSHPGYYLQDDVYKFDASFFGISPKEAKAMDPSQRLMLEVAYEAFESAGLTLEAVSGSNTSVYAAQWACDYRDMMARDLQNAPTYAATGTGTTLLSNRLSWFFDLRGPSLTINTACSSTMVALHEACESLRRGESDMALVAGANVILCPDMFTYLGMQNFLSSSGKCKSFDATGDGYGRGEGIAALVLKRVSTAVAEKSPIRAVIRGTGVNQNGRMKGITLPSVEAQVALMKKTYELAGLPVTGTAYVDAHGTGTQAGDPVELEAIGKVIAQARGADSGKQVIVGSGKAGIGHTEATAGLASVIRSVLILESGLIPPNIYLTQLNPNLRLDEWNLEIP…	gene_05727/MGPKDDDIAIIGLSCRFAGDAKDVNGYWDLLSRGKSAFSPKARFDGDRAGSSSSSSSHPGYYLQDGVYQFDASFFGISPKEAKGMDPSQRLMLEVAYEAFESAGLTPEAVAGSNTSVYAAQWTCDYRDMLARDLANAPTYAATGTGTTLLSNRLSWFFDLRGPSFTINTACSSSMVALHEACESLRRGESDMALVAGANVILCEDMFTYLGMQNFLSSSGKCKSFDATGDGYGRGEGVAAIVLQRVPAVVDEGKSPIRAVIRGTGINQNGRMKGITLPSIEAQVALMHKTYESAGIAATETAYVDAHGTGTQAGDPVELEAIGKAIAQAGGGAGSRKKVLVGSGKASIGHTEASAGLASVIRSVLILESGLIPPNIYLTQLNPNLRLD…	gene_03345/MGPKDDDIAIIGLSCRFAGDAKDVNGYWDLLSRGKSAFSPKARFDGDRAGSSSSSSHPGYYLQDDVYQFDASFFGISPKEAKGMDPSQRLMLEVAYEAFESAGLTPEAAAGSNTSVYAAQWTCDYRDMLARDLANAPTYAATGTGTTLLSNRLSWFFDLRGPSFTINTACSSSMVALHEACESLRRSESDMALVAGANVILCEDMFTYLGMQNFLSSSGKCKSFDATGDGYGRGEGVAAILLQRVPAVVDEGKSPIRAVIRGTGVNQNGRMKGITLPSVEAQVALMHKTYESAGITATDTAYVDAHGTGTQAGDPVELEAIGKAIAQTGGGAGSGKKVLVGSGKASIGHTEASAGLASVIRSVLILESGLIPPNIYLTQLNPNLRLDE…			gene_11588/MASESDIAIVGLSCRFAGEAKDVSGYWDLLRQGKSAFSPRARFDVAATSTSSPHPGYYLEEDVYKFDASFFGISPKEAKAMDPSQRLMLEVAYEAFESAGLTLKDVAGSNTSVYAAQWTCDYRDMMARDLQNAPTYAATGTGTTLLSNRLSWFFDLTGPSLTINTACSSSMVALHEACESLRSGESDMALVVGSNLILCPDMFTYLGMQNFLSSSGKCKSFDATGDGYGRGEGIAALILKRVPTAVDDRSHIRAVIRGTGVNQNGRMKGITLPSVDAQVALIKKTYQSAGLPVTETAYVDAHGTGTQAGDPVELEAIGKVIAHARGSSSGKTVLVGSGKASIGHTEATAGLASVIRSVLILESGLIPPNIYLTQLNPNLRLEEWNLEV…	gene_05472/MAPESDIAIVGLSCRFAGDAKDVHGYWDLLRQGKSAFSPRARFDDAATSTSSSSHPGYYLEDDVYKFDASFFGISPKEAKAMDPSQRLMLEVAYEAFESAGLTLEAVAGSNTSVYAAQWACDYRDMMARDLQNAPTYAATGTGTTLLSNRLSWFFDLTGPSLTINTACSSSMVALHEACESLRRGESDMALVAGANVILCPDMFTYLGMQNFLSSSGKCKSFDATGDGYGRGEGVAALVLKRVPTAVEDRSPIRAVIRGTGVNQNGRMKGITLPSVEAQVALMQKTYQSAGLPVTETAYVDAHGTGTQAGDPVELEAIGKVIAQARGSDSGRKVMVGSGKASIGHTEATAGLASVIRSVLILESGLIPPNIYLTQLNPNLRLEEWNLE…		gene_09489/MAPKDDIAIVGLSCRFAGDAKDVHGYWDLLRQGKSAFSPRARFDGAASSSHPGYYLQDNVYKFDASFFGISPKEAKAMDPSQRLMLEVAYEAFESAGLTLEAVAGSNTCVYAAQWTCDYRDMLARDLQNAPTYAATGTGTTLLSNRLSWFFDLRGPSLTINTACSSSMVALHEACESLRRGETDMALVASANVILCPDMFTYLGMQNFLSTSGKCKSFDATGDGYGRGEGIAALVLKRVPTAVEEKSPIRAVIRGTAVNQNGRMKGITLPSVDAQVALMKKTYQSAGLPVSETAYVEAHGTGTKAGDPVELEAIGTAIAQARSLDSGKKVIVGSGKSSIGHTEASAGLASVIRSVLILESGLIPPNLYLTQLNPNLRLDEWNLEIPTQ…	gene_14982/MASEVDIAIVGMSCRFAGDAKDVTGYWDLLRQGNSAFSPRARFDGAASSLSSSHPGYYLQDDVYKFDASFFGISPKEAKAMDPSQRLMLEVAYEAFESAGLTLEAVSGSNTSVYAAQWACDYRDMMARDLQNAPTYAATGTGTTLLSNRLSWFFDLRGPSLTINTACSSSMVALHEACESLRRGESDMALVAGANVILCPDMFTYLGMQNFLSSSGKCKSFDATGDGYGRGEGIAALVLKRVPTAMEEKSPIRAVIRGTGVNQNGRMKGITLPSVEAQVALMNKTYQSAGLPVTETAYVDAHGTGTQAGDPVELEAIGKVIGQARCSDSGRKVIVGSGKANIGHTEATAGLASVIRSVLILESGLIPPNIYLTQLNPNLRLDEWYLEI…			gene_15265/MEEEVEADTETEILADLAYTLNQRRTHFTWRTSIAASSISELKVAAENAAGKSVTSHGKQTMDEAGLCFVFTGQGAQWPRMGQELYLESATFRSSIDTADRYFRDVLHCSWSVVDELFRDETKSRVDQHAFSQPLTTVLQMGLVDLLQEWNIKPDWIIGHSSGEIAGAYCLGALTQHDAWKIAYSCGAFESEQEGSMMAVSISKNEADSIIREHASSGGVVVACINSPTNVTLAGDSASLDDLEKLLHGRSIFSQRLRVDVAYHSSHMEAMVAAYKQAISQIVLDEAVPARTMFSAVTGEEICAHELGPAYWGKNIASQVRFSDAVKNLITSFPTRNKIFVEIGPHHTMQLPLKQILTRCSTPLGTSTEYVYLLSRGKDSAATAYAAA…
PKS17			gene_07400/MLPNRAITNEPDSPQPSKPAPDEMNDFPDDAIAIVGAGCRLPGANNLEELWAAISQGQSRLEKLRPERCNPKETYRAVQDPAWIAQREFYGNFLDDVAGFDHAFFGISSREATHMDPQQRLLLETAFEAMDSSGYLHGHRRERGDPVGCFIGASYTEYLENTSAYTPSAFTATSTIRAFLSGKISYHFGWTGPSEVIDTACSASLVAVHRACRAIQAGECSMALAGGVNIITGVNNYFDLAKAGFLSPTGQCKPFDDSADGYCRADGVCLVVLKPLRQAIEDRDNIMGVIPAVATNQGGVNAPGITVPDGSCQKALYRTLLDRSGLKSYDVSYIEAHGTGTRVGDPIEMASIRDVFGGPQRNDPLYIGSLKSNIGHSETAAGAAGLLK…	gene_06648/MLPNRAITNEPDSPQISKPAPDEMNDFPDDAIAIVGAGCRLPGANNLEELWAAISQGQSRLEKLRPERCNPKETYHDVAGFDHAFFGISSREATHMDPQQRLLLETAFEAMDSSGYLHGHRRERGDPVGCFIGASYTEYLENTSAYTPSAFTATSTIRAFLSGKISYHFGWTGPSEVIDTACSASLVAVHRACRAIQAGECSMALAGGVNIITGVNNYFDLAKAGFLSPTGQCKPFDDSADGYCRADGVCLVVLKSLRQAIADRDNIMGVIPAVATNQGGVHAPSITVPDGSCQKALYKTLLDRSGLRSDDVSYIEAHGTGTRVGDPIEMASIRGVFGGPHRTEPLYIGSLKSNIGHSETAAGAAGLLKVLVMLQHGGVPPLRGFKRL…	gene_16266/MELELSDVAYTLSQRRKHHRFRWYVLADNMSDLVEQLQGLNREHIITCPKTPRKVILAFSGQSGTKIGLDPSILRDNPRLAHHIESCNQVLVDLGCPDIMTALHQIEPISDPTVLQCGLVAVQYSCARCWIEGGLEVAGIVGHSLGELAALAVSGVLSLEDMLRVVYMRAELMKTKFGNEKGAMLAIHAKLETVKAIIEAAKERSPKGDQLEIACYNSTTSHVVVGSTESIQMTLTVLKEEAQYHGIRFHRVDVTHGFHSRLVEPLLQGLSEVEKSIEFREPAIRIETSTRLPNTFGRQQNLEYLTNHARQPVYFVDAVRRLEAELGPCIWLEAGLGTPVIPMAKRAVANPSTHKFLSVTAPEVAAADLWREGVAATCWSFLTPAESN…	gene_13655/MINAKEDVAKTIIKTSNTAALKDSQPLIEKVDELVDPPMRNTRHRDETSANLLAPRPPLPEMASEPGYQANKGFPDDAIAIVGAGCRLPGANTLEELWTVVSQGQSRLESLRPERCNPKQTYRAVQDPAWIAQREFYGNFLDDVAGFDHAFFGISPREAIHMDPQQRLLLETAFEAMDSSGYLHGHRRERGDPVGCFIGASYTEYLENTSTYTPSAFTATSTIRAFLSGKISYHFGWTGPSEVIDTACSASLVAVHRACRAIQAGECSMALAGGVNIITGVNNYFDLAKAGFLSPTGQCKPFDDSADGYCRADGVCLVVLKPLRQAIEDRDKIMGVIPAVATNQGGVNAPGITVPDGSCQKALYRTLLDRSGLKSDDVSYIEAHGTGT…	gene_05692/MSRYPIILSAATPESLQRQARNLAQHLSKPAMELELSDVAYTLSQRRKHHRFRWYVLADNMSDLVEQLQGLSREHIITCPKTPRKVILAFSGQSGTKIGLDPSILRANPRLAHHIESCNQVLVDLGCPDIMTALHQIEPISDPTVLQCGLVAVQYSCARCWIEGGLEVAGIVGHSLGELAALAVSGVLSLEDMLRVVYMRAELMKTKFGNEKGAMLAIHAKLETVKAIIEAAKERSPKGDQLEIACYNSTTSHVVVGSTESIQMALTVLKEEAQYHGIRSHRVDVTHGFHSRLVEPLLQGLSEVEKSIEFREPAIRIETSTRLPNTFGRQQNLEYLTSHARQPVYFVDAVRRLEAELGPCIWLEAGVGTPVIPMVRRAVADPATHTFQ…			gene_05247/MLPIKASSSTTNSQQSDDSRPDIMHDFPDDSIAVVGAGCRLPGANDLEDLWQIISQGQSRLEKLRPERCNPHKTYRAVQDPAWIARREFYGNFLDDAAGFDRGLFGISPREAAHMDPQQRLLLETAFEAMDSSGYLHGHRRERGDPVGCFVGASYTEYQENTNAYAPSAYTATGTIRAFLSGKISYHFGWTGPSEVIDTACSASLVAIHRACRAIQAGECTMALAGGVNLITGVNNYFDLAKAGFLSTTGQCKPFDDAADGYCRADGVCLVVLKPLRQAIADRDDIMGVIPAVATNQGGVHASGITVPDGSCQKALYRTLLKRSGLTSDDVSYMEAHGTGTRVGDPIEMASIREVFGGSQRTDPLYVGSLKSNIGHSETAAGAAGLLK…	gene_12972/MLPIKASSSTTNSQQSDDSRPDIMHDFPDDSIAVVGAGCRLPGANDLEDLWQIISQGQSRLEKLRPERCNPHKTYRAVQDPAWIARREFYGNFLDDAAGFDHGLFGISPREAAHMDPQQRLLLETAFEAMDSSGYLHGHRRERGDPVGCFVGASYTEYQENTNAYAPSAFTATGTIRAFLSGKISYHFGWTGPSEVIDTACSASLVAIHRACRAIQAGECTMALAGGVNLITGVNNYFDLAKAGFLSPTGQCKPFDDAADGYCRADGVCLVVLKPLRQAIADRDDIMGVIPAVATNQGGVHASGITVPDGSCQKALYRTLLKRSGLTSDDVSYMEAHGTGTRVGDPIEMASIREVFGGSQRTDPLYVGSLKSNIGHSETAAGAAGLLK…	gene_14728/MASNTPPSIASDSRSANEQGLEEQNEFPDDAVAIVGAGCRKSRLEKLRPERCDPKQAYRAIQDPAWIEKRGFYGNFIDDVDAFDHTFFGISPREAAHMDPQQRLLLETAFQAMDSSGYLHGHQRERGDPIGCFIGASYREYLENTSAYSPSAFTATSTIRAFLSGKISYHFGWTGPSEVIDTACSASLVAVHRACRAIQAGECTMALAGGVNIITGVHNYFDLAKAGFLSPTGQCKPFDESADGYCRADGVCLVVLKPLRHAVADGDDIMGVIPAVATNQGGVHAPGITVPDGTCQKALYRTLLKRSGLVPDDVSYMEAHGTGTRVGDPIEMASIREVFGGAQRKNPLYIGSLKSNIGHSETAAGVAGLLKVLAMLRHGGIPPLRGFK…	gene_14668/MPPATSATIASDSGQSDGQGPGDQNRFPDDAIAIVGAGCRLPGANNLEDLWDIISQGQSRLEKLRPERCDPKQAYRAILDPAWIEKCEFYGNFIADVDAFDHTFFGISPREAAHMDPQQRLLLETAFQAMDSSGYLHDHQREHGDQVGCFIGASYTEYLENTSAHSPSAFTATSTIRAFLSGKISSHFGWTGPSEVIDTACSASLVAVHRACRAIQAGECSMALAGGVNVITGVHNYFDLAKAGFLSPTGQCKPFDESADGYCRADGVCLVVLKPLRHAVADGDDIMGVILAVATNQGGVHAPGITVPDETCQKALYSTLLKRANLAPDDVSYMEAHGTGTRVGDPIKMASTREVFGGPQRTNPLYIGSLKSNIGHSETAAGAAGLLK…	gene_05207/MAPTRLPTVGSDSDPADGQGPVGQNDFTDDAIAIIGAGCRLPGANNLEDLWDIISQGQSRLEKLRPERCSPKDSYRAIQDPAWIAKREFYGNFIDDVDAFDHAFFGISPREAAHMDPQQRLLLETAFQAMDSSGYLHDHQRERGDPVGCFIGASYTEYLENTSAYSPSAFTATSTIRAFLSGKISYHFGWTGPSEVIDTACSASLVAVHRACRAIQAGECTMALAGGVNVITGVHNYFDLAKAGFLSPTGQCKPFDDSADGYCRADGVCLVVLKPLRQAIADGDDIMGVIPAVATNQGGVHAPGITVPDGTCQKALYKTLLNRSGLGSNDISYIEAHGTGTRVGDPIEMASIRDVFGGSDRTNPLYIGSLKSNIGHSETAAGAAGLLK…	gene_00069/MASNTPPNIASDSRPADEQGPGVQNDFPDDAIAIVGAGCRLPGANNLEDLWDIISQGKSRLEKLRPERCDPKQAYRAIKDPAWIAKREFYGNFIDDVDSFDHAFFGISPREAAQMDPQQRLLLETAFQAMDSSGYLHDHQRERGDPVGCFIGASYTEYLENTSAYSPSAFTATSTIRAFLSGKISYHFGWTGPSEVIDTACSASLVAVHRACRAIQSGECSMALAGGVNVITGVHNYFDLAKAGFLSPTGQCKPFDESADGYCRADGVCLVVLKPLRLAVADGDDIMGVIPAVATNQGGVHAPGITVPDGTCQKALYRTLLKRSVLGPDDISYIEAHGTGTRVGDPIEMASIREVFGGSQRTNPLYIGSLKSNIGHSETAAGAAGLLK…						gene_10677/MINAKEDVAKTIIKTSNTAALKDSQPLIEKVDELVDPPMRNTRHRDETSANLLAPRPPHDAIAIVGAGCRLPGANTLEELWTVVSQGQSRLESLRPERCNPKQTYRAVQDPAWIAQREFYGNFLDDVAGFDHAFFGISPREAIHMDPQQRLLLETAFEAMDSSGYLHGHRRERGDPVGCFIGASYTEYLENTSTYTPSAFTATSTIRAFLSGKISYHFGWTGPSEVIDTACSASLVAVHRACRAIQAGECSMALAGGVNIITGVNNYFDLAKAGFLSPTGQCKPFDDSADGYCRADGVCLVVLKPLRQAIEDRDKIMGVIPAVATNQGGVNAPGITVPDGSCQKALYRTLLDRSGLKSDDVSYIEAHGTGTRVGDPIEMASIRDVFGG…
PKS18		gene_14402/MEPIAIVGISFRLPQGAENEDSLWDILEAGKNVMTEWPESRANLDAFNSPKPSNNNALSSRGGYFLKEDPAAFDAPFFSITPKEAASMDPQQRWMLEATYRALENAGIPVEKASGTSTAVFAASMADDYAKLTYKDPDEVPTHVKTSLGSFMLANRLSWFFDLKGPSIQINTACSSSLTATDLACQSLRSGQSPMAIVAGSNVALTPEEHLQLEKLSLLSPDSQCYSFDSRANGYARGEGVLVLVLKTLTSAIRDRDMIRAVIRASGSNQDGHTPGLTQPSADSQEDLIRSVYKSCSLDFGLTRYIEAHGTGTQLGDSVEAKTIGRVFRTYRSPKEPLYIGSVKANVGHLEGASGIVGILKSVMILERGIIPPNALFEKWNAKINAKF…	gene_01829/MEPIAIVGLSFRLPQGAENEDSLWDILEAGKNVMTEWPESRANLDAFYSPKPSVHNALSSRGGYFLKEDPAAFDAPFFSITPKEAASMDPQQRWMLEATYRALENAGIPVEKAAGTSTAVFAASMADDYAKLTYKDPDEVPTHVKTGLGSFMLANRLSWFFDLKGPSIQINTACSSSLVATDLACQSLRSGQSPMAIVAGSNVALTPEEHMELEKLSLLSPDSQCYSFDRRANGYSRGEGVLVLVLKTLKNAIQDGDMIRAVIRASGSNQDGHTPGLTQPSADSQEDLIRSVYKSCSLDFGLTRYIEAHGTGTQLGDSVEAKTIGRVFRTYRSPKEPLYIGSVKTNVGHLEGASGIVGILKSVMILERGIIPPNALFEKWNAKINAKF…	gene_14510/MEPIAIVGLSFRLPQGAENEDSLWDILEAGKNVMTEWPESRANLDAFYSPKPSIHNALYSRGGYFLKEDPAAFDAPFFSITPKEAASMDPQQRWMLEATYRALENAGIPVEKAAGTSTAVFAASMADDYAKLTYKDPDEVPTHVKTGLGSFMLANRLSWFFDLKGPSIQINTACSSSLVATDLACQSLRSGQSPMAIVAGSNVALTPEEHMELEKLSLLSPDSQCYSFDRRANGYSRGEGVLVLVLKTLKNAIQNGDMIRAVIRASGSNQDGHTPGLTQPSADSQEDLIRSVYKSCSLDFGLTRYIEAHGTGTQLGDSVEAKTIGRVFRTYRSPKEPLYIGSVKTNVGHLEGASGIVGILKSVMILERGIIPPNALFEKWNAKINAKF…	gene_09527/MEPIAIVGLSFRLPQGAENEDSLWDILEAGKNVMTEWPESRANLDAFYSPKPSIHNALSSRGGYFLKEDPAAFDAPFFSITPKEAASMDPQQRWMLEATYRALENAGIPVEKAAGTSTAVFAASMADDYAKLTYKDPDEVPTHVKTGLGSFMLANRLSWFFDLKGPSIQINTACSSSLVATDLACQSLRSGQSPMAIVAGSNVALTPEEHMELEKLSLLSPDSQCYSFDRRANGYSRGEGVLVLVLKTLKNAIQDGDMIRAVIRASGSNQDGHTPGLTQPSADSQEDLIRSVYKSCSLDFGLTRYIEAHGTGTQLGDSVEAKTIGRVFRTYRSPKEPLYIGSVKTNVGHLEGASGIVGILKSVMILERGIIPPNALFEKWNAKINAKF…	gene_15395/MEPIAIVGLSFRLPQGAENEDSLWDILEAGKNVMTEWPESRANLDAFYSPKPSIHNALSSRGGYFLKEDPAAFDAPFFSITPKEAASMDPQQRWMLEATYRALENAGIPVEKAAGTSTAVFAASMADDYAKLTYKDPDEVPTHVKTGLGSFMLANRLSWFFDLKGPSIQINTACSSSLVATDLACQSLRSGQSPMAIVAGSNVALTPEEHMELEKLSLLSPDSQCYSFDRRANGYSRGEGVLVLVLKTLKNAIQDGDMIRAVIRASGSNQDGHTPGLTQPSADSQEDLIRSVYKSCSLDFGLTRYIEAHGTGTQLGDSVEAKTIGRVFRTYRSPKEPLYIGSVKTNVGHLEGASGIVGILKSVMILERGIIPPNALFEKWNAKINAKF…	gene_14105/MEPIAIVGLSFRLPQGAENEDSLWDILEAGKNVMTEWPESRANLDAFYSPKPSIHNALSSRGGYFLKEDPAAFDAPFFSITPKEAASMDPQQRWMLEATYRALENAGIPVEKAAGTSTAVFAASMADDYAKLTYKDPDEVPTHVKTGLGSFMLANRLSWFFDLKGPSIQINTACSSSLVATDLACQSLRSGQSPMAIVAGSNVALTPEEHMELEKLSLLSPDSQCYSFDRRANGYSRGEGVLVLVLKTLKNAIQDGDMIRAVIRASGSNQDGHTPGLTQPSADSQEDLIRSVYKSCSLDFGLTRYIEAHGTGTQLGDSVEAKTIGRVFRTYRSPKEPLYIGSVKTNVGHLEGASGIVGILKSVMILERGIIPPNALFEKWNAKINAKF…					gene_11454/MEPIAIVGISFRLPQGAENEDSLWSILEAGKNVMTEWPESRANLDAFCNPKPSINNAVRTSAYSLRGSILSLSSDTSESCLPEEAIFSRGTRLPSMLHSSPSHRRMPTNRHKEAASMDPQQRWMLEATYRALENAGIPAEKAAGTNTAVFAASMADDYAKLAYKDPDEVPTHVKTGLNSFMLANRLSWFFDLKGPSIQINTACSSSLVATDLACQSLRSGQSPMAIVAGSNLALTPEEHLELEKLNLLSPDSRCYSFDSRANGYARGEGVVVLVLKTLTTAIRDRDMIRAVIRASGSNQDGHTPGLTQPSGESQEDLIRSVYRSCSLDFGLTRYIEAHGTISARTESFVQLGTGTQLGDSVEAKTIGRVFQTHRSPREPLYIGSVKAN…	gene_01060/MEPIAIVGISFRLPQGAENEDSLWSILEAGKNVMTEWPESRANLDAFCNPKPSINNAVRTSAYSLRGSILSLSSDTSESCLPEEAIFSRGTRLPSMLHSSPSHRRRQHRWTRSNAGCWRQRIELWRTWTAGIPAEKAAGTNTAVFAASMADDYAKLAYKDPDEVPTHVKTGLNSFMLANRLSWFFDLKGPSIQINTACSSSLVATDLACQSLRSGQSPMAIVAGSNLALTPEEHLELEKLNLLSPDSRCYSFDSRANGYARGEGVVVLVLKTLTTAIRDRDMIRAVIRASGSNQDGHTPGLTQPSGESQEDLIRSVYRSCSLDFGLTRYIEAHGTISARTESFVQLGTGTQLGDSVEAKTIGRVFRTHRSPREPLYIGSVKANIGHLE…	gene_15402/MEPIAIVGISFRLPQGAESEDSLWNILETGRNVMTEWPESRANLDAFPSPKASINNALSSRGGYFLEEDPAVFDAPFFSITPKEAASMDPQQRWMLEATYRALENAGIPVEKAAGTSTAVFAASMADDYAKLAYKDPDEVPTHVKTGLGSFMLANRLSWFFDLKGPSIQINTACSSSLTATDLACQSLRSGQTPMAIVAGSNSALTPEDHLGLEKLSLLSPDSQCYSFDSRANGYARGEGVVVLVLKTLKSAIRDHDMIRAVIRASGSNQDGHTPGLTQPSADSQEDLIRSVYRSCSLDFGLTRYIEAHGTGTQLGDSVEAKTIGRVFRTYRSPKEPLYIGSAKANVGHLEGASGMVGILKSVMILERGTIPPNPLFEKWNKKVNAKF…		gene_14311/MEPIAIVGISFRLPQGAEDEDSLWEILEAGTNVMTEWPESRVNLDAFYNPDPSVNNAVCSMSSFSSDTRESYLPEGAIFSRRTRLPSMLRSFLLHRRASNHESKSIYTPTDMHKEAASMDPQQRWMLEATYRALENGTAHPLNIFSLISENSVEAKALGRVFRTYRSPKEPLYIGSVKANIGHLEGASGIVGILKSVMILERGIIPPNALFEKWNPKINAKFNSLCVRLFPCSINGNTEIYKVPTSCIPWPAAGLRRISVNSFGLGGSNGHLILDDAFHTLETIGAEALVHTSHSLQSFVLGHRRPDIEGRSHQQENGLPAIELEPAPFHSSEGLSASQTRKPSDGTPKARLLVWSAKDEAALKRVLRDYDAFYAAAKQRHDIDSFVE…				gene_06441/MEPIAIVGISFRLPQGAEDEDSLWNILETGRNVMTEWPESRAKLDAFPSPRPSINNSLSSRGGYFLKGDPAVFDAPFFSITPNGKHKEAASMDPQQRWMLEATYRALENAGIPAEKAAGTSTAVFAASMADDYAKLTYKDPDEVPTHVKTGLGSFMLANRLSWFFDLKGPSIQINTACSSSLTATDLACQSLRSGQTPMAIVAGSNAALTPEEHLELEKLSLLSPDSRCYSFDSRAHGYARGEGVVVLVLKTLKSAIRDHDMIRAVIRASGSNQDGHTPGLTQPSADSQEDLIRSVYKSCNLDFGLTRYIEAHGTGTQLGDSVEAKTIGRVFRTYRSTKEPLYIGSVKANVGHLEGASGMVGILKSVMILERGIIPPNPLFEKWNKRI…	gene_15627/MEPIAIVGLSFRLPQGAENEDSLWDILEAGKNVMTEWPESRANLDAFYSPKPSIHNALSSRGGYFLKEDPAAFDAPFFSITPKEAASMDPQQRWMLEATYRALENAGIPVEKAAGTSTAVFAASMADDYAKLTYKDPDEVPTHVKTGLGSFMLANRLSWFFDLKGPSIQINTACSSSLVATDLACQSLRSGQSPMAIVAGSNVALTPEEHMELEKLSLLSPDSTGTQLGDSVEAKTIGRVFRTYRSPKEPLYIGSVKTNVGHLEGASGIVGILKSVMILERGIIPPNALFEKWNAKINAKFNHLCVPTSCIPWPAAGLRRISVNNFGLGGSNSHIILDDAFHTLETIGSKRLVHMSDSLQRFALCHLDSESVGVANGHNTVKELCGVD…
PKS19			gene_16319/MPAESTSMLVCGSLIASHNAASLAHLRSSLVHDPSFAGLKQELTELPDVWSLLVDREPSLAAVDAAPLFHSLSSWLQGNSSSEALSLPEGAPKNILYAILTVLTHTLEYATFLGRSNATTAGDDDAHSRRLEDFQDGGVQGLCIGLLSGIAIACSKNRVELGKNAAIAVRLAICAGACVDLAELQSAEPTVCLSARWSRHEESQTNDDCVVAATLKYYPGAYISVRSDVCSATITTNKGSVPALIKALEEKGAVVKRINLSGRYHHSMYTPMFEKLLDISGSQPIFQFPQTARPLVPLRRSDSGELVTHDETPLHEIALRCILVETADWHKTMVKTLETMAAKAASKSAGAESLTLQKFVLGPMDCAPKPAFAPLPIHTIRPAAVPES…	gene_05174/MPAESTSMLVCGSLIASHNAASLAHLRSSLVHDPSFAGLKQELTELPDVWSLLVDREPSLAAVDAAPLFHSLSSWLQGNSSSEALSLPEGAPKNILYAILTVLTHTLEYATRRLEDFQDGGVQGLCIGLLSGIAIACSKNRVELGKNAAIAVRLAICAGACVDLAELQSAEPTVCLSARWSRHEESQTNNDCVVAATLKYYPGAYISVRSDVCSATITTNKGSVPALIKALEEKGAVVKRINLSGRYHHSMYTPMFEKLLDISGSQPIFQFPQTARPLVPLRRSDSGELVTHDETPLHEIALRCILVETADWHKTMVKTLETMAAKAASKSAGAESLTLQKFVLGPMDCAPKPAFAPLPIHTIRPAAVPESSYSYPDDAIAVIGLSCR…	gene_10557/MPAESTSMLVCGSLIASHNAASLAHLRSSLVHDPSFAGLKQELTELPDVWSLLVDREPSLAAVDAAPLFHSLSSWLQGNSSSEALSLPEGAPKNILYAILTVLTHILEYATFLDRSNATTAGDDDAHSRRLEDFQDGGVQGLCIGLLSGIAIACSKNRVELGKNAAIAVRLAICAGACVDLAELQSAEPTVCLSARWSRHEESQTNNDCVVAVTLKYYPGAYISVRSDVCSATITTNKGSVPALIKALEEKGAVVKRINLSGRYHHSMYTPMFEKLLGISGSQPIFQFPQTARPLVPLRRSDSGELVTHDETPLHEIALRCILVETADWHKTMVKTLETMAAKAASKSTGAESLTLQKFVLGPMDCAPKPAFAPLPIHTIRPAAVPES…	gene_10946/MPAESTSMLVCGSLIASHNAASLAHLRSSLVHDPSFAGLKQELTELPDVWSLLVDREPSLAAVDAAPLFHSLSSWLQGNSSSEALSLPEGAPKNILYAILTVLTHTLEYATFLDRSNATTAGDDDAHSRRLEDFQDGGVQGLCIGLLSGIAIACSKNRVELGKNAAIAVRLAICAGACVDLAELQSAEPTVCLSARWSRHEESQTNNDCVVAATLKYYPGAYISVRSDVCSATITTNKGSVPALVKALEEKGAVVKRINLSGRYHHSMYTPMFEKLLDISGSQPIFQFPQTARPLVPLRRSDSGELVTHDETPLHEIALRCILVETADWHKTMVKTLETMAAKAASKSTGAESLTLQKFVLGPMDCAPKPAFAPLPIHTIRPAAVPES…	gene_07417/MPAESTSMLVCGSLIASHNAASLAHLRSSLVHDPSFAGLKQELTELPDVWSLLVDREPSLAAVDAAPLFHSLSSWLQGNSSSEALSLPEGAPKNILYAILTVLTHTLEYATFLDRSNATTAGDDDAHSRRLEDFQDGGVQGLCIGLLSGIAIACSKNRVELGKNAAIAVRLAICAGACVDLAELQSAEPTVCLSARWSRHEESQTNNDCVVAATLKYYPGAYISVRSDVCSATITTNKGSVPALIKALEEKGAVVKRINLSGRYHHSMYTPMFEKLLDISGSQPIFQFPQTARPLVPLRRSDSGELVTHDETPLHEIALRCILVETADWHKTMVKTLETMAAKAASKSAGAESLTLQKFVLGPMDCAPKPAFAPLPIHTIRPAAVPES…			gene_12809/MPVESTSMLVCGSLIASHNPANLTHLRSSLVHDPSFSGLRRELTELPDVWSLLVDREPSLGSVDAAPLFHSLSSWLEGSSLSCETLSLPEGAPKNTFYAVLTVLTHILEYATFLDRSTTGVEDDAHIKRLEDFRDGGVQGLCIGLLSGMAIACSKNKVELGKNAAIAVRLAICAGACVDLAEQQSAEHTVCLSARWSRQEDSPTHECVVATILKEHPEAYISVRSDVCSATITSPKGSLPGLIKSLEEKGAVVKRINLSGRYHHNMHLPMFKKLLEICESIPLFQFPQTARPLVPLRRSDSGELVAQDEPPLHEIALRCILIETADWHTTMVKSLEAMVAKATLPDGDSLKLQNSSDPRQPPESSYAYPDDAIAVVGLSCRFPNAETP…	gene_14544/MPVESTSMLVCGSLIASHNPANLTHLRSSLVHDPSFSGLRRELTELPDVWSLLVDREPSLGSVDAAPLFHSLSSWLEGSSLSCETLSLPEGAPKNTFYAVLTVLTHILEYATFLDRSTTGVEDDAHIKRLEDFRDGGVQGLCIGLLSGMAIACSKNKVELGKNAAIAVRLAICAGACVDLAEQQSAEPTVCLSARWSRQEDSPTHECVVATILKEHPETDSEIQAYISVRSDVCSATITSPKGSLPGLIKSLEEKGAVVKRINLSGRYHHNMHLPMFKKLLEICESIPLFQFPQTARPLVPLRRSDSGELVVQDEPPLHEIALRCILIETADWHTTMVKSLEAMVAKATLPDGDSLKLQKFVLGPMDCAPRPAFAPLPVQLIRPAAAP…			gene_15622/MLVCGSLIASHNAASLTHLRSSLVHDPSLAGLKQELSELPDVWQLLVDREPSLASVDAAPLFHSLSSWLAGDVNSSETLVLPEGTPKNTFYAVLTVLTHILEYATFLDRSQVDHPAGTEYDAHTRRLEDFQHGGIQGLCIGLLSAIVLASSKTKAELGKNAAVAVRLAICAGACVDLAELQSAEPTVCLSARWSRHEETSSTNECVVGTILKDYSEVSPATHSFVSTLRLHILTMNQAYISVRSDVCSATITTSKGSTPALIKSLEERGAVVKRINLSGRYHHSMHLPMFMKLLAICESLPLLQFPQTAHPLVPLRQSDSGELVAAGESPLHEIALRCILIETADWHTTMVKSLEDMVTNAKTSGSETKTLKKYVLGPMDCAPRPAFA…	gene_08342/MPAESTSMLVCGSLIASHSAASLARLRSGLVHDPSLAGLRQELAELPDVWSLLVDRAPSLREVDAAPLFRSLSGWLAGDSTSSETLGLPEGTPKNTFHAVLTVLTHILEYATFLDRSQVEHQQHSFGAGDDAQTKRLEDFRVGGIQGLCIGLLSAIVLACSKTKAELGKNAAVAVRLAICAGACVDLAELQSAEPTVCLSARWSRREDTPANECVVEAAYISVRSDICSATITASKGSVPALITALEEKGAVVKRINLSGRYHHPIHMPMFTKLLEICESLPLFQFPQAAHPLVPLRRSDSGELVAAGGKTPLHEIALRCILIETADWHTTMAKSLEAMAANATMTTSTSGEGGEPKTLKKLVLGPMDCAPRPAFSPLPVQLIRPAAA…	gene_04369/MPAESTPMLVCGSLIASHNAATLTHLRSSLVHDPSLAGLRQELIELPDVWSLLVDREPSFGSVDAAPLFHSLSDWLAGRGSSETLSLPEGAPKNTFYAVLTVLTHILEYSTFLDRNNVDHPVRAGDDGHTKRLEDFRDGGIQGLCVGLLSAIAIACSMNKVELGKNAAIAVRLAICAGACVDLAELQSAEPTVCLSARWSRHEDSSTNECAVAAILKEYPKAYISVRSDVCSATITASKGSVPALIKSLEEKGAVVKRINLSGRYHHSMHSPMFKILLDICESLPLFQFPHTSRPLVPLRWSDSGELVASQDETPLHEVALRCILIETADWHTTMVKSLEAMVAKATSGPEYLKLQKYVLGPMDCAPRPAFAPLPIQLIRPAAVPESS…					gene_01853/MPAESTSMLVCGSLIASHNAASLSHLRSSLVHDPSFAGLRQQLTELPDVWSLLVDREPSLAAVDAAPLFHSLSSWLQGNSSSEALSLPEGAPKNILYAILTVLTHILEYATFLDRSNATTAGDDDAHSRRLEDFQDGGVQGLCIGLLSGIAIACSKNRVELGKNAAIAVRLAICAGACVDLAELQSAEPTVCLSARWSRHEESQTNNDCVVAATLKYYPGAYISVRSDVCSATITTNKGSVPTLIKALEEKGAVVKRINLSGRYHHSMYTPMFEKLLDICGSQPIFQFPETARPLVPLRRSDSGELVAQDETPLHEIALRCILVETADWHKTMVKTLETMAAKAASKSAGAESLTSYKYPVIISANSPASIRKYCESVLELVDTKQAA…
PKS20	gene_00295/MTPKDRELMPPIAVVGISCRLPGGANCPDELWQFLAKGAEAWSPVPPERFHEAAFHHPSADDPNGTTHHQGGHFIDADVRDFDASFFRISPQQAAAMDPQQRFLLEMSYEALESAGWSREHVAGSSTSVYTAMFTADYERNLYKDTLDLPIYYTTGTEKAILSNRISHYFDLHGPSVTLDTACSGGLVALHQACQSLRAGESSASLVAAANLTLGPDHHVGMSNLHLVGASGRCHPFDRRGTGYGRGEGLVVLALKRLDDALRDRDPVRAVVRGTAVNQDGYTAQGITYPNGAAQAALIRAAYARCGGGLRPQDVAYVEAHGTGTVAGDTEELNALASVFASSSSSSSSSSNTPRSLPLYVGSIKGNIGHTENTSGLASLVKATLILD…		gene_11888/MEPEAPRVIVTDDEVEFPPLKNVPRVIMAGEVQFPRLEPDTTVCFLNGTRWEKEFVKSVVETHYHRVDMGVRFRFVEPENPWTVPIRITFRDKGHSHSFPDRVARRLRVHYTMLLNITFERGPVRKQHAVLHEFGHFLGLKHQHQHPDAGFKWNEEALKGLGLTNDMVIGNYTGHIVSPCGAPYDRDSIMHYEIQPWQTHNITEAITPGSVLSKGDKELLMLMYPKPLSWYVEEMVVEYIQRTVAGKIALPVSPIAEELAPAANSLRSATDQQVAWPCETRQRYLGHFQRFSSAVHADLKQLKSQFLPF	gene_15577/MSPKDQEPMPPIAVVGISCRLPGGANCPDELWQFLAKGGEAWSPVPPERFNEAAFHHPSADDPNGTSHHQGGHFIDADVRDFDASFFRISPQQAAAMDPQQRFLLETSYEALESAGWSREHVAGSDTSVHTAMFTADYERNLYKDPLDLPVYYTTGTERSILSNRISHHFDLHGPSVTLDTACSGGLVALHQACQGLRDGESSAALVAAANLTLGPDQHVGMSNLHLVGASGRCHPFDRQGNGYGRGEGLVVLALKRLDDALRDRDPIRAVIRGTAVNQDGYTPQGITYPNGAAQAALIRTAYARCGGGLRPQDVAYVEAHGTGTVAGDTEELNALADVFASSSSSSPNTPRSVPLYVGSIKGNIGHTENTSGLASLVKASLILDHEQ…	gene_04327/MSPKDQEPMLPIAVVGISCRLPGGANCPDELWQFLAKGGEAWSPVPPERFNEAAFHHPSADDPNGTSHHQGGHFIDADVRDFDASFFRISPQQAAAMDPQQRFLLEMSYEALESAGWSREHVAGSDTAVYTAMFTADYERNLSILSNRISHHFDLHGPSVTLDTACSGGLVALHQACQGLRDGESGAALVAAANLTLGPDQHIGMSNLHLVGASGRCHPFDRRGTGYGRGEGLVVLALKRLNDALRDRDPIRAVIRGTAVNQDGYTPQGITYPNGAAQAALIRTAYARCGGGLRPQDVAYVEAHGTGTVAGDTEELNALADVFASSSSSSPNTPRSNTSGLASLVKATLILDHQQIPPVAGFADPKPGLPLDKMRIPTEMTPFPILAG…	gene_13188/MSPKDQEPMLPIAVVGISCRLPGGANCPDELWQFLAKEAKLGRLYPLNDSTRPHSTIPAPMIPMGPATTRRFLLEMSYEALESAGWSREHVAGSDTSVYTAMFTADYERNLYKDPLDLPVYYTTGTERSILSNRISHHFDLHGPSVTLDTACSGGLVALHQACQGLRDGDSGAALVAAANLTLGPDQHIGMSNLHLVGASGRCHPFDRRGTGYGRGEGLVVLALKRLDDALRDRDPIRAVIRGTAVNQDGYTPQGITYPNGAAQAALIRAAYARCGGGLRPQDVAYVEAHGTGTVAGDTEELNALADVFASSSSSSPNTPRSVPLYVGSIKGNIGHTENTSGLASLVKASLILDHEQIPPVAGFADPKPGLPLDKMRIPTEMTPFPIS…	gene_03205/MMRAHLDWLAKNPDLLSLADLSYTLCHRRSWLNWRFGCVAQDRVSLMQKLQRGLENGEAVGGGNPSSGFRPRAADPYVIFVFTGQGAQWAGMGRELFATPTSPTTTTSPCPIFQKSIAASSAMLKELGAEWDLAEELQRDAPETRLNTAALAQPATTALQIALVDRLRAQGIKPRAVVGHSSGEIAAAYAAGRLSHRAAVGIAYHRGCCVAAASSSGSGLLPRGVMMAVGLGEQGVAPYLKNLACGGRAGVACVNSPDNVTLSGDSDAVDEVAARLAADERGVFHRRLMVDTAYHSHHMQVVAEDYLGRLDRLPVDESCSDTAQEDDAIAFISSVSGRLKTDCFNSAYWTANLVSQVRF CDAIQTLVNYRVSESSGRDALFIEIGPH…			gene_11551/MGLRNQDAMAPIAVVGISCRLPGGANTPIPCQGGEAWSPVPPDRFNEAAFHHPSADDPNGTTHHQGGHFIDADVRDFDSSFFRLSPQQAAAMDPQQRFLLEMTYEALESAGWTREGVAGSNTSVYTAMFTADYERNLYRDPLDLPVYYITGTEKAILSNRISHYFDLHGPSVTLDTACSGGLVALHQACQSLRDGESSAALVSAANLTLGPDHHVGMSNLHLVGGSGRCYPFDARGAGYGRGEGLVVLALKRLDDALRDRDPVRAVVRATAVNQDGYTPQGITYPNGAAQAALVRAAYARSGGLRPRDVGYVEAHGTGTVAGDTEELNALADVFASSDTAAARSLPLYVGSIKGNIGHTENASGLASLVKAALILEHQQIPPVAGFST…	gene_00381/MGLRNQDAMAPIAVVGISCRLPGGANTPSELWQFLAKGGEAWSPVPPDRFNEAAFHHPSADDPNGTTHHQGGHFIDADVRDFDSSFFRLSPQQAAAMDPQQRFLLEMTYEALESAGWTREGVAGSNTSVYTAMFTADYERNLYRDPLDLPVYYITGTEKAILSNRISHYFDLHGPSVTLDTACSGGLVALHQACQSLRDGESSAALVSAANLTLGPDHHVGMSNLHLVGGSGRCYPFDARGAGYGRGEGLVVLALKRLDDALRDRDPVRAVVRATAVNQDGYTPQGITYPNGAAQAALVRAAYARSGGLRPRDVGYVEAHGTGTVAGDTEELNALADVFASSDTAAARSLPLYVGSIKGNIGHTENASGLASLVKAALILEHQQIPPV…				gene_11230/MNNPDVCNEPIALVGISLRLPGGANDIDGLWDLIASGESAWQPVPEDRYNGEAFYHPNADDPNGTSNHPGGHFISGDVRDFDHTFFKFTKAQAAAADPQQRILLELAYEALENSGIPQESLAGTATSVFTAIFPLDYDRLLFKDTLDLPTYYMTGGEKAIMSNRISHVLDLRGPSMTIDTACSGGLVALHQACQSLRAGESHTALVTATNLLLGPDHFIGLSNLHMLSSTGRCYPFDERGKGYGRGEGVVVLVLKRLSDAVRDRNPIRALIRGSAIGHDGYTPQSITYPNGGAQASLARAAYARAGLKPEEVPYVEAHGTGTKAGDREELAGLAEVFANGSEPRPTPLYVGSIKGAIGHTEATAGLASVVKAVAMLERAQIPPVAGFA…						gene_14575/MTPFPISAGITPTVSINSFGFGGTNAHVILQKGPRPPPLQRINDDDDSSPRLFVFSAHSESSLKMMMRAHLDWLAKEPDLLSLADLSYTLCHRRSKLNWRFSCVAHDRVSLMQQLQRGLENGGAVGGASPSSAFRPRTSDPYIIFVFTGQGAQWAGMGRELFATSTSTTTTTSPCPIFQKSIAASSAILKELGAEWDLAEELQRDAARTRLNTAALAQPATTAVQIALVDRLHAQGIRPRAVVGHSSGEIAAAYAAGRLSHRAAVGIAYHRGCCVAAASSSGSGLLPRGAMMAVGLGEQGVAPYLKNLACGGRVGVACVNSPGNVTLSGDSDAVDEVAVRLAADERGVFHRRLMVDTAYHSHHMQVVAEDYLGRLDRLPVDESCGDNT…
PKS21	gene_08468/MARESLSLGNGGPTLGSRPTTAISISLPESLGDFSSGFSWNIPHLNDLDLRKSTLSEQAGSGVRSSAAATAAPAQTTPAVPEQKGEAPEAAAPPPLPPKPMRKEDEPLSNAINIILARSRAYEPLRKKNEQPWWTTRSEESAAKAEKARANMQDKLPPEGTELYFVYPRDCCKSHETRSIDQHLEDSVEAYAMHRSQHFEGVLFWRAFLTKFQVDTLNDMLEVEKVEHQPRPDPTAKRMSDVAPFFTPSRENKKLDDNTPWPPGKSLYVIWARHSEDEKEVRSIDGQLEEIAGPENVYVEVYPTQVYFWRAFLTKSQSEIVEKFPEVGSIGTRLHPRAADTYDPTDC	gene_12067/MAFPTSPTDSTTFSEQSDVMSALSTKIVFFGNDFSDHNLPSLFGSFQKHSRDRSFPFLSQLLTESWQMLQHELSLLPNELRESVPPFQDIQRLVTFYASNTLCPLAPAISGALLCISQIAGLIGYHEADSLPYTLHQSSTSLTGLSVGILAAAGVSVSSSLSDLVQTGVESARIAWRLGVHVNSKSQLLESAQTEGSPDSWAYVVTGLSVEEIQSELDVINSKSSHPELLKIFVSAADKSSVSVTGPPSRLKAAFHSSHVLRYSKWLPLPVYGGLCHAPHLYTNDDAITIVYESDFRSFVDQKPVLPLYSSQSGEPFKEKAYAQLLNAIVIEILTNGIYLDNLEAGLIGAIRQSSYCEILRFGKSLVSDHILAEIQSQLPQLKVNDDH…	gene_00923/MAFPTSPTDSTTFSEQSDVMSALSTKIVFFGNDFSDHNLPSLFGSFQKHGRDRDFPFLNQLLTESWHMLQHELSLLQNDLRESVPPFQDIQRLATFYASNTLCPLAPAISGALLCISQAAGLVGYHEADQTPYTLHNSSSNLTGLSVGILTAAGVSVSSSLSDLVQTGVESARIAWRLGVHVNAKSQLLESAQTEGSPDSWAYVVTGLSVGEIQNELDVINSKSSHPELLKIFVSAADKSSVSVTGPPSRLKAAFHSSHVLRYSKWLPLPVYGGLCHAPHLYTDEDAQTVVYESDFRSSVDRKPVLPLYSSQSGEVFKEKTYAQLLKAIVVEILTNGIYLDNLEAGLISAIRQSSYCEFLRFGKSLVSDHILSEIQSQLPQVKVNDDH…	gene_06250/MAFPTSPTDSTTFSEQSDVMSALSTKIVFFGNDFSDHNLPSLFGSFQKHGRDRDFPFLNQLLTESWHMLQHELSLLQNDLRESVPPFQDIQRLATFYASNTLCPLAPAISGALLCISQVAGLVGYHEADQTPYTLHNSSSNLTGLSVGILTAAGVSVSSSLSDLVQTGVESARIAWRLGVHVNAKSQLLESAQTEGSPDSWAYVVTGLSVGEIQNELDVINSKSSHPELLKIFVSAADKSSVSVTGPPSRLKAAFHSSHVLRYSKWLPLPVYGGLCHAPHLYTDEDAQTVVYESDFRSSVDRKPVLPLYSSQSGEVLKEKTYAQLLKAIVVEILTNGIYLDNLEAGLISAIRQSSYCEFLRFGKSLVSDHILSEIQSQLPQVKVNDDH…	gene_08861/MAFPTSPTDSTTFSEQSDVMSALSTKIVFFGNDFSDHNLPSLFGSFQKHGRDRDFPFLNQLLTESWHMLQHELSLLQNDLRESVPPFQDIQRLATFYASNTLCPLAPAISGALLCISQVAGLVGYHEADQTPYTLHNSSSNLTGLSVGILTAAGVSVSTSLSDLVQTGVESARIAWRLGVHVNAKSQLLESAQTEGSPDSWAYVVTGLSVGEIQSELDVINSKSSHPELLKIFVSAADKSSVSVTGPPSRLKAAFHSSHVLRYSKWLPLPVYGGLCHAPHLYTDEDAQTVVYESDFRSSVDRKPVLPLYSSQSGEVFKEKTYAQLLKAIVVEILTNGIYLDNLEAGLIGAIRQSSYCEFLRFGKSLVSDHILSEIQSQLPQVKVNDDH…	gene_14751/MAFPTSPTDSTTFSEQSDVMSALSTKIVFFGNDFSDHNFPSLFGSFQKHGRDRDFPFLNQLLTESWHMLQHELSLLQNDLRESVPPFQDIQRLATFYASNTLCPLAPAISGALLCISQVAGLVGYHEADQTPYTLHNSSSNLTGLSVGILTAAGVSVSSSLSDLVQTGVKSARIAWRLGVHVNAKSQLLESAQTEGSPDSWAYVVTGLSVGEIQSELDVINSKSSHPELLKIFVSAADKSSVSVTGPPSRLKAAFHSSHVLRYSKWLPLPVYGGLCHAPHLYTDEDAQTVVYESDFRSSVDRKPVLPLYSSQSGEVFKEKTYAQLLKAIVVEILTNGIYLDNLEAGLIGAIRQSSYCEFLRFGKSLVSDHILSEIQSQLPQVKVNDDH…	gene_12267/MAFPTSPTDSTTFSEQSDVMSALSTKIVFFGNDFSDHNLPSLFGSFQKHGRDRDFPFLNQLLTESWHMLQHELSLLQNDLRESVPPFQDIQRLTTFYVSNTLCPLAPAISGALLCISQVAGLVGYHEADQTPYTLHNSSSNLTGLSVGILTAAGVSVSSSLSDLVQTGVESARIAWRLGVHVNAKSQLLESAQTEGSPDSWAYVVTGLSVGEIQSELDVINSKSSHPELLKIFVSAADKSSVSVTGPPSRLKAAFHSSHVLRYSKWLPLPVYGGLCHAPHLYTDEDAQTVVYESDFGSSVDRKPVLPLYSSQSGEVFKEKTYAQLLKAIVVEILTNGIYLDNLEAGLIGAIRQSSYCEFLRFGKSLVSDHILSEIQSQLPQVKVNDDH…			gene_06017/MAFPTSPTDSTTFSEQSDVMSALSTKIVFFGNDFSDHNLPSLFGSFQKHSRDRDFPFLSQLLTESWHMLQHELSLLPHELRDTVPQFQDIQRLVTFYASNTLCPLAPAISGALLCISQIAGLIGHHEADSSPYTLHHAATSLAGLSVGILAAAGVSVSTSLSDLVQTGVESARIAWRLGVHVNAKSQLLESAQNEGSPDSWAYVVTGLGVQEIQKELDVINSKSGHPELLKIFVSAADKSSVSVTGPPSRLKAAFHSSHILRYSKWLPLPVYGGLCHAPHLYTDKDAEQIVYESDFRSSVDRKPVLPLYSSQSGEPFKEKTYAQLLKAIAVEILTNGIYLDSLEAGLIGAVRQSSYSEMLRFGKSLVSDHILAEIQSQLPQLKISDDH…	gene_03630/MAFPTSPTDSTTFSEQSDVMSALSTKIVFFGNDFSDHNLPSLFGSFQKHSRDRDFPFLSQLLTESWHMLQHELSLLPHELRDTVPQFQDIQRLVTFYASNTLCPLAPAISGALLCISQIAGLIGHHEADSSPYTLHHAATSLAGLSVGILAAAGVSVSTSLSDLVQTGVESARIAWRLGVHVNAKSQLLESAQNEGSPDSWAYVVTGLGVQEIQKELDVINSKSGHPELLKIFVSAADKSSVSVTGPPSRLKAAFHSSHILRYSKWLPLPVYGGLCHAPHLYTDKDAEQIVYESDFRSSVDRKPVLPLYSSQSGEPFKEKTYAQLLKAIAVEILTNGIYLDSLEAGLIGAVRQSSYSEMLRFGKSLVSDHILAEIQSQLPQLKISDDH…										gene_14992/MAFPTSPTDSTTFSEQSDVMSALSTKIVFFGNDFSDHNFPSLFGSFQKHGRDRDFPFLNQLLTESWHMLQHELSLLQNDLRESVPPFQDIQRLATFYASNTLCPLAPAISGALLCISQVAGLVGYHEADQTPYTLHNSSSNLTGLSVGILTAAGVSVSSSLSDLVQTGVKSARIAWRLGVHVNAKSQLLESAQTEGSPDSWAYVVTGLSVGEIQSELDVINSKSSHPELLKIFVSAADKSSVSVTGPPSRLKAAFHSSHVLRYSKWLPLPVYGGLCHAPHLYTDEDAQTVVYESDFRSSVDRKPVLPLYSSQSGEVFKEKTYAQLLKAIVVEILTNGIYLDNLEAGLIGAIRQSSYCEFLRFGKSLVSDHILSEIQSQLPQVKVNDDH…
PKS22		gene_07181/MPFIRDSPSSGDSSSESNYGFPSFQAIVDDETYAAKLLPTSAEKPLSEQLEPIAVVGMGCRLPGEVKSASGFWELMMDKKSGQTPKVPKSRFNIDAHFHANNDRPGSFNVLGGYFLADETLKEFDPSFFGITPIEAMWMDPQQRKLLEVVYEAFESAGVTLDAVAGSKTAVFAASFTADFQQMCFKEPSFRHSFAATGVDPGILSNRISHVFNLRGPSIVVNTACSSSVYAVHNACNALRNKECAAAVVGGVNLVLTVDQHMNTAKLGVLSPNSACSTFDAAADGYGRAEGVGAVYLKRLSDAIRDGDPIRAVIRSSATNNNGRVPAVGITHPNRDGQVEVITHAYQRGGNLDPLLTGYFECHGTGTAVGDPLEVHAVSLAMNQSRRP…	gene_06734/MPFIRDNSPSSGGSSTESNYGYPSPQSIVDDETYAAKLLPTSAEKPLSEQLEPIAVVGMGCRLPGEVKSASGFWKFMMDKKTGQTPKVPKSRFNIDAHFHANNDRPGSFNVLGGYFLADETLEEFDPSFFGITPIEAMWMDPQQRKLLEVVYEAFESAGVTLDAVAGSKTAVFAASFTADFQQMCFKEPSFRHSFAATGVDPGILSNRISHVFNLRGPSIVVNTACSSSVYAVHNACNALRNKECAAAVVGGVNLVLTVDQHMNTAKLGVLSPNSACSTFDAAADGYGRAEGVGAVYLKRLSDAVRDGDPIRAVIRSSATNNNGRVPAVGITHPNRDGQVEVITHAYQRGGNLDPLLTGYFECHGTGTAVGDPLEVHAVSLAMNQSRR…	gene_07333/MPFIRDNSPSSGGSSTESNYGYPSPQSIVDDETYAAKLLPTSAEKPLSEQLEPIAVVGMGCRLPGEVKSASGFWKFMMDKKTGQTPKVPKSRFNIDAHFHANNDRPGSFNVLGGYFLADETLEEFDPSFFGITPIEAMWMDPQQRKLLEVVYEAFESAGVTLDAVAGSKTAVFAASFTADFQQMCFKEPSFRHSFAATGVDPGILSNRISHVFNLRGPSIVVNTACSSSVYAVHNACNALRNKECAAAVVGGVNLVLTVDQHMNTAKLGVLSPNSACSTFDAAADGYGRAEGVGAVYLKRLSDAVRDGDPIRAVIRSSATNNNGRVPAVGITHPNRDGQVEVITHAYQRGGNLDPLLTGYFECHGTGTAVGDPLEVHAVSLAMNQSRR…	gene_03857/MPFIRDNSPSSGGSSTESNYGYPSPQSIVDDETYAAKLLPTSAEKPLSEQLEPIAVVGMGCRLPGEVKSASGFWKFMMDKKTGQTPKVPKSRFNIDAHFHANNDRPGSFNVLGGYFLADETLEEFDPSFFGITPIEAMWMDPQQRKLLEVVYEAFESAGVTLDAVAGSKTAVFAASFTADFQQMCFKEPSFRHSFAATGVDPGILSNRISHVFNLRGPSIVVNTACSSSVYAVHNACNALRNKECAAAVVGGVNLVLTVDQHMNTAKLGVLSPNSACSTFDAAADGYGRAEGVGAVYLKRLSDAVRDGDPIRAVIRSSATNNNGRVPAVGITHPNRDGQVEVITHAYQRGGNLDPLLTGYFECHGTGTAVGDPLEVHAVSLAMNQSRR…	gene_14314/MPFIRDNSPSSGGSSTESNYGYPSPQSIVDDETYAAKLLPTSAEKPLSEQLEPIAVVGMGCRLPGEVKSASGFWKFMMDKKTGQTPKVPKSRFNIDAHFHANNDRPGSFNVLGGYFLADETLEEFDPSFFGITPIEAMWMDPQQRKLLEVVYEAFESAGVTLDAVAGSKTAVFAASFTADFQQMCFKEPSFRHSFAATGVDPGILSNRISHVFNLRGPSIVVNTACSSSVYAVHNACNALRNKECAAAVVGGVNLVLTVDQHMNTAKLGVLSPNSACSTFDAAADGYGRAEGVGAVYLKRLSDAVRDGDPIRAVIRSSATNNNGRVPAVGITHPNRDGQVEVITHAYQRGGNLDPLLTGYFECHGTGTAVGDPLEVHAVSLAMNQSRR…	gene_05018/MPFIRDNSPSSGGSSTESNYGYPSPQSIVDDETYAAKLLPTSAEKPLSEQLEPIAVVGMGCRLPGEVKSASGFWKFMMDKKTGQTPKVPKSRFNIDAHFHANNDRPGSFNVLGGYFLADETLEEFDPSFFGITPIEAMWMDPQQRKLLEVVYEAFESAGVTLDAVAGSKTAVFAASFTADFQQMCFKEPSFRHSFAATGVDPGILSNRISHVFNLRGPSIVVNTACSSSVYAVHNACNALRNKECAAAVVGGVNLVLTVDQHMNTAKLGVLSPNSACSTFDAAADGYGRAEGVGAVYLKRLSDAVRDGDPIRAVIRSSATNNNGRVPAVGITHPNRDGQVEVITHAYQRGGNLDPLLTGYFECHGTGTAVGDPLEVHAVSLAMNQSRR…									gene_14723/MHIRYIDQVRRITYRIVKMPFMRATSSPGESSTESGYGVYSAQAIVNDETYAAKLLSTSAEKPLSEQLEPIAVVGMVVYEAFESAGVTLVEVAGSKTAVFAASFTSDFQQMCFKEPSFRHSFAATGVDPGILSNRISHVFNLRGPSIVVNTACSSSIYAVHNACNALRNKECAAAVVGGVNLVLTVGQHINTAKLGMLSPNSACSTFDAAADGYGRAEGVGAVYLKRLSDAIRDGDPIRAVIRSSATNNNGRVPAVGITHPNRDGQVEVITHAYQRGGNLDPLLTGYLECHGTGITVGDPLEVHAVSLAMNQSRRPGEDPPLMVGAVKTNIGHSEAASGLSALIKAVLSVERGVVIPTRLKNPSPSIKWDQWAVTVPTEPTAFRHSQI…	gene_03177/MPFIRDSPSSGDSSTESNYGFPSSQAIVDDETYAAKLLPTSTEKPLSEQLEPIAVVGMGCRLPGEVKSASGFWKLMMDKKSGQTPKVPKSRFNIDAHFHANNDRPGSFNVLGGYFLADETLQEFDPSFFGITPIEAMWMDPQQRKLLEVVYEAFESAGVTLDTIAGSKTAVFAASFTADFQQMCFKEPSFRHSFAATGVDPGILSNRISHVFNLRGPSIVVNTACSSSVYAVHNACNALRNKECAAAVVGGVNLVLTVDQHMNTAKLGVLSPNSACSTFDAAADGYGRAEGVGAVYLKRLSEAIRDGDPIRAVIRSSATNNNGRAVQTIMTSSEFAKVDMLIEIGPHSAMGGPIRQIKSALGHAKMEYLPTLVRGEDSAVRMLMLAGE…	gene_09599/MPFMRDTPSPGESSTESGYGTYSAQAIVDDETYAAKLLPTSAERPLSEQLEPIAVVGMGCRLPGEVKSASNFWSFMMNKKSGQTPKVPESRFNIDAHFHANNDRPGSFNVLGGYFLADETLQEFDPSFFGITPIEAMWMDPQQRKLLEVVYEAFESAGVTLDELAGSKTAVFAACFTADFQQMCFKEPSFRHSFAATGVDPGILSNRISHVFNLRGPSIVVNTACSSSVYAVHNACNALRNKECAAALVGGVNLVLTVDQHMNTAKLGVLSPNSACSTFDVAADGYGRAEGVGAVYLKRLSDAIRDGDPIRAVIRSSATNNNGRVPAVGITHPNRDGQVEVITHAYQRGGNLDPLLTGYFECHGTGTAVGDPLEVHAVSLAMNQSRRP…			gene_09910/MPFIRDNSPSSGGSSTESNYGYPSPQSIVDDETYAAKLLPTSAEKPLSEQLEPIAVVGMGCRLPGEVKSASGFWKFMMDKKTGQTPKVPKSRFNIDAHFHANNDRPGSFNVLGGYFLADETLEEFDPSFFGITPIEAMWMDPQQRKLLEVVYEAFESAGVTLDAVAGSKTAVFAASFTADFQQMCFKEPSFRHSFAATGVDPGILSNRISHVFNLRGPSIVVNTACSSSVYAVHNACNALRNKECAAAVVGGVNLVLTVDQHMNTAKLGVLSPNSACSTFDAAADGYGRAEGVGAVYLKRLSDAVRDGDPIRAVIRSSATNNNGRVPAVGITHPNRDGQVEVITHAYQRGGNLDPLLTGYFECHGTGTAVGDPLEVHAVSLAMNQSRR…
PKS23	gene_00783/MAAEKSISTKMGEQAFTPTTASSGTPTSSSSPTTASSPTSASSYVEVNGEALHCDPTRDVAIVGMSCRTAGGLNSPEKLWNFLMDKGDASGEIPQHRWEPWMRRDPRNKKEIEQTVSRGYFIEDLENFDAAFFGISPKEANQMDPHQRLGLELAWEALENAGIDPHSLAESDTAVYMGCDSDDYSRLLMEDLPNIEPWMGIGTAAHGIPNRISYHLNLMGPSAAVDAACASGLVAIHMGCRAILDGESTVALVGGVNVLLSPGLTRMLGKAGALSPEGICRSFDDDANGYARGEGGAVVVLKNLAAAIADGDHILAVTKGSAVAQDGKTNGIMAPNAKAQELVGRQALERARLSPASVDYVEAHATSTKLGDPTEVSALAALYGAGAG…	gene_05585/MAADKSTSPAKGEEGFTPTTSTSSYVEFNEETLLHCDPTRDVAVVGMSCRTAGGLNTPEKLWEFLMDKKDASGEVPQHLVRDAMAWPHTTNNKNTQLSPRTAAVCCYGYGGTVAHAVIQQTPPSSVTTPLSPVTKQHNDHNQGPIILPVSASQLKRLAPRSKQMAEWFSHPSSEAYSLRDIAHTLSRRRAHQAYRAAIVVETHKEAIDAMNALAEDECDGKDHIAIGGRILGSATDRSTDVVWVFSGHGAQWKEMGTSLLKSRVFTGFVQELDILVQKEAGFSAIKALQTGDFENNTEQIQVLTYVVQIGLHRILASEGVEPQAVIGHSVGEVAASVVAGCLDVKEGLLLVARRAKLYAHLRTKVNGAMALVQLPYAQVTKELAGRED…	gene_10446/MAAEKSISTKMGEQAFTPLTASSGTPTSSSSPTTASSPTSASSYVEVNGEALQCDPTRDVAIVGMSCRTAGGLNSPEKLWDFLMDKKDASGEVPRHRWEPWMRRDPRNKKEIEQTVSRGYFIEDLENFDAAFFGISPKEANQMDPHQRLGLELAWEALENAGIDPHSLAESDTAVYMGCDSDDYSRLLMEDLPNIEPWMGIGTAPHGIPNRISYHLNLMGPSAAVDAACASGLVAIHMGCRAILDGESTVALVGGVNVLLSPGLTRMLGKAGALSPEGICRSFDDDANGYARGEGGAVVVLKNLAAAIADGDHILAVTKGSAVAQDGKTNGIMAPNAKAQELVGRQALERARLAPSAVDYVEAHATSTKLGDPTEVSALAALYGAGAG…	gene_01756/MAAEKSISTKMGEQAFTPLTASSGTPTSSSSPTTASSPTSASSYVEFNGEALQCDPTRDVAIVGMSCRTAGGLNSPEKLWDFLMDKKDASGEKEIEQTVSRGYFIEDLENFDAAFFGISPKEANQMDPHQRLGLELAWEALENAGIDPHSLAESDTAVYMGCDSDDYSRLLMEDLPNIEPWMGIGTAPHGIPNRISYHLNLMGPSAAVDAACASGLVAIHMGCRAILDGESTVALVGGVNVLLSPGLTRMLGKAGALSPEGICRSFDDDANGYARGEGGAVVVLKNLAAAIADGDHILAVTKGSAVAQDGKTNGIMAPNAKAQELVGRQALERARLAPSAVDYVEAHATSTKLGDPTEVSALAALYGAGAGRDQASPVYLGSIKPNVG…	gene_08582/MPSLLPPTPPRRTNDYELGPTILPVSASQLKRLAPRSKQLAEWLSEPANEAYSLRDIAHTLSRRRAHHPHRAAVVVESHQEASDAMSAVAADECDGKDHIAFGGRVLGTPTDRATDVVWVFSGHGAQWKEMGTSLLRSRVFAEFLRELDGLVQKEAGFSALEALRTGDFEESTERVQVLTYVVQVGLHRLLRSEGVAPQAVIGHSVGEVAASVVAGCLDVEEGLLLVARRAKLYADLRTKVVGAMALVQLPFSQVSKELAGREQDIVAAIDSSPSSCVVSGKAESVDGFVQQLKARGVKTFRVNTDVAFHSPMLEDYSAPLAKVLEGSMHPHTPTIPAYSTSAADPRAQILRGVEYWQNNMVGPVMLQSAVKAALDDGYRIFLEISSH…	gene_06993/MPHGRRPQLPEKLWDFLMDKKDASGEVPRHRWEPWMRRDPRNKKEIEQTVSRGYFIEDLENFDAAFFGISPKEANQMDPHQRLGLELAWEALENAGIDPHSLAESDTAVYMGCDSDDYSRLLMEDLPNIEPWMGIGTAPHGIPNRISYHLNLMGPSAAVDAACASGLVAIHMGCRAILDGESTVALVGGVNVLLSPGLTRMLGKAGALSPEGICRSFDDDANGYARGEGGAVVVLKNLAAAIADGDHILAVTKGSAVAQDGKTNGIMAPNAKAQELVGRQALERARLAPSAVDYVEAHATSTKLGDPTEVSALAALYGAGAGRDQASPVYLGSIKPNVGHLEAAAGAIGFVKAVLAVNKGQLAPQAKLNKLNSRVDWANSGLQVVRDA…	gene_00098/MAWPTHKKTDTTNDNDNDNSLINRTSPRTAAVCCYGYGGTVAHAVIQQITPSNAITPPPTPPRRNNDYELGPTILPVSASQLKRLAPRSKQLAEWLSEPANEAYSLRDIAHTLSRRRAHHPHRAAVVVESHQEASDAMSAVAADECDGKDHIALGGRVLGTPTDRATDVVWVFSGHGAQWKDMGTSLLRSRVFAEFLRELDGLVQKEAGFSALEALRTGDFEESTERVQVLTYVVQVGLHRLLRSEGVAPQAVIGHSVGEVAASVVAGCLDVEEGLLLVARRAKLYADLRTKVVGAMALVQLPFSQVSQELAGREQDIVAAIDSSPSSCVVSGKAESVDEFVQQLKARGVKTFRVNTDVAFHSPMLEDYSAPLAKVLEGSMHPHTPTI…			gene_02729/MSCRTAGGLNSPEKLWEFLMDKKDASGEVPQHRWEPWLRRDVRNKKELQQTISRGYFIEDLENFDAAFFGISPKEANQMDPHQRLGLELAWEALEDAGIDPHALAESDTAVYMGCDSDDYSRLLMEDLPNIEPWMGIGTAAHGIPNRISYHLNLMGPSAAVDAACASGLVAIHLGMRAILDGESTVALAGGVNVLLSPALTRMLGKAGALSPGGVCRSFDDDADGYARGEGGAVIVLKNLAAAVADGDRILAVAKGSAVAQDGKTNGIMAPNAGAQELAHATSTKLGDPTEVSALAALYGAGAGRNQTSPVYLGSIKPNVGHLEAAAGAIGFVKAVLAVNKGRLAPQARLNKLNSRIHWPSSGLQVVRDAMAWPGTKDNNNTQISPRT…	gene_14169/MAAENPMSPVKGEKGFTPSTSTSSYVEVNEDNSLQCDPTRDVAIVGMSCRTAGGLNTPEKLWEFLMDKKDASGEVPQHRWEPWLRRDVRNKKELQQTISRGYFIEDLENFDAAFFGISPKEANQMDPHQRLGLELAWEALEDAGIDPHALAESDTAVYMGCDSDDYSRLLMEDLPNIEPWMGIGTAAHGIPNRISYHLNLMGSSAAVDAACASGLVAIHLGMRAILDGESTVALAGGVNVLLSPALTRMLGKAGALSPGGVCRSFDDDADGYARGEGGAVVVLKNLAAAVADGDRILAVAKGSAVAQDGKTNGIMAPNARAQELVGRQALARARLPPSAVDYVEAHATSTKLGDPTEVSALAALYGAGAGRNQTSPVYLGSIKPNVGH…										gene_05746/MAAEKSISTKMGEQAFTPLTASSGTPTSSSSPTTASSPTSASSYVEVNGEALQCDPTRDVAIVGMSCRTAGGLNSPEKLWDFLMDKKDASGEVPRHRWEPWMRRDPRNKKEIEQTVSRGYFIEDLENFDAAFFGISPKEANQMDPHQRLGLELAWEALENAGIDPHSLAESDTAVYMGCDSDDYSRLLMEDLPNIEPWMGIGTAPHGIPNRISYHLNLMGPSAAVDAACASGLVAIHMGCRAILDGESTVALVGGVNVLLSPGLTRMLGKAGALSPEGICRSFDDDANGYARGEGGAVVVLKNLAAAIADGDHILAVTKGSAVAQDGKTNGIMAPNAKAQELVGRQALERARLAPSAVDYVEAHATSTKLGDPTEVSALAALYGAGAG…
PKS24			gene_14317/MSSLLTSLSDGEDEPVMPIAIIGIGGRFPGDASNPEKLWEMISKGQSALSKVPPDRFNIDAFYHPYGERQGTINAREAHFMNRDVSAFDAPFFKLSATEAKAMDPQQRWCLESTYEALENAGLTMDQVNGSNTSVYVGSFTTDYSNLLNCDREDLPTYQATGTGAAMMANRISWYFNFKADSTSFDTACSSSLVALHHGCKGLRTGECTMSVVGGVNFILLPDMMSTMSHMNFLSPDGTSKPFDHRANGYSRGEGAAFCVLKPLDLALKDGDVIRAVIRNTDVNQDGFTPGITQPSSEAQENLIRRVYADAGLNLAHTTYVEAHGTGTPIGDPLEAKALGRTFGNARQSGDSVYIGSLKSNIGHLEGGSGTAQVIKAIFMLEQGQIPP…	gene_01064/MSSLLTSLSDGEDEPVMPIAIIGIGGRFPGDASNPEKLWEMISKGQSALSKVPPDRFNIDAFYHPYGERQGTINAREAHFMNRDVSAFDAPFFKLSATEAKAMDPQQRWCLESTYEALENAGLTMDQVNGSNTSVYVGSFTTDYSNLLNCDREDLPTYQATGTGAAMMANRISWYFNFKADSTSFDTACSSSLVALHHGCKGLRTGECTMSVVGGVNFILLPDMMSTMSHMNFLSPDGTSKPFDHRANGYSRGEGAAFCVLKPLDLALKDGDVIRAVIRNTDVNQDGFTPGITQPSSEAQENLIRRVYADAGLNLAHTTYVEAHGTGTPIGDPLEAKALGRTFGNARQSGDSVYIGSLKSNIGHLEGGSGTAQVIKAIFMLEQGQIPP…	gene_13804/GLTMDQVNGSNTSVYVGSFTTDYSNLLNCDREDLPTYQATGTGAAMMANRISWYFNFKADSTSFDTACSSSLVALHHGCKGLRTGECTMSVVGGVNFILLPDMMSTMSHMNFLSPDGTSKPFDHRANGYSRGEGAAFCVLKPLDLALKDGDVIRAVIRNTDVNQDGFTPGITQPSSEAQENLIRRVYADAGLNLAHTTYVEAHGTGTPIGDPLEAKALGRTFGNARQSGDSVYIGSLKSNIGHLEGGSGTAQVIKAIFMLEQGQIPPSLYYEKPNPHIPMDDWNLRVPTELTPWPADGLRRISINSFGYGGTNAHCILDDAYHYLKERRLAGNHNVKVADGSSPAISEDSGVSLSEPIGPLTLRNTDTESETEPDKAMALFPRLLIWS…	gene_07671/MSSLLTSLSDGEDEPVMPIAIIGIGGRFPGDASNPEKLWEMISKGQSALSKVPPDRFNIDAFYHPYGERQGTINAREAHFMNRDVSAFDAPFFKLSATEAKAMDPQQRWCLESTYEALENAGLTMDQVNGSNTSVYVGSFTTDYSNLLNCDREDLPTYQATGTGAAMMANRISWYFNFKADSTSFDTACSSSLVALHHGCKGLRTGECTMSVVGGVNFILLPDMMSTMSHMNFLSPDGTSKPFDHRANGYSRGEGAAFCVLKPLDLALKDGDVIRAVIRNTDVNQDGFTPGITQPSSEAQENLIRRVYADAGLNLAHTTYVEAHGTGTPIGDPLEAKALGRTFGNARQSGDSVYIGSLKSNIGHLEGGSGTAQVIKAIFMLEQGQIPP…	gene_09317/MDQVNGSNTSVYVGSFTTDYSNLLNCDREDLPTYQATGTGAAMMANRISWYFNFKADSTSFDTACSSSLVALHHGCKGLRTGECTMSVVGGVNFILLPDMMSTMSHMNFLSPDGTSKPFDHRANGYSRGEDGSSPAISEDSGVSLSEPIGPLTLRNTDTESETEPDKAMALFPRLLIWSSNEKEGVYRTCAAHASYLKSKFAELEAKHKSEVFSKLIRTLHARRSRLPWKSFSIVNSLNVVGTLEGSIVEPVRSSGEKPPLIFIFTGQGAQWYAMGRQLFSVPIFRKRMNEADAYMKSLGASWSLTAELYRDQDDTRLGLAHISQPACTALQVALVDLLRQWKVVPDSVIGHSSGEIAAAYAKGAITRQDAWAIAFHRGRLASQVGRA…	gene_12742/MLSTDQYNLPIYQPTGNGNAIMSNCTSKPLELAIKNGDVIRGVIRNSAVHQDGLTNGITLPSSVAQQALIRRVYADAGLSLAHTAYIEAHGTGTPAGDPIEAEALGKTLGKARQRGDPAYLGSIKSNVGHLECGAGLAQMIKAVKMLEHGKIPASLHYEKPNPNIPMDEWNLRVPTELPPGPVLVFGGLASSLLALELAGNHDFQAAAESSPAASHDSGHSSGKIAAAYAKKAITRQDAWAIAYHRGRLASHVGIAGAMMATGLGYYDAAAYIDRHVPGSGNAEAIDKLETIIKGDGHFARKLEKVDVAYHSEHMRVIAETHREALVHIPPLIPEDPRGIKMYSSLHSKVVSSDMLGPDYWVDNMTSPVNFLGGMQALVKSPVIAKNR…								gene_06491/MPEPSEPIAVVGIAGRFPGDADNPQKLWDMVREGRNALTKIPTSRFNVEAFYHPHGERQGTLNVNKAHFMDRDVSAFDAQFFNLRASEVEAMDPQQRMALECTYEALENEAAGIPKEKVWGSNISCYVGSFTDDYKGMLNCDRENLPLYESTGVGSAMMSNRISWFFDMKGPSISIDTACSSSLVAFHLGCQSLRTGESTMAVVGGTNYILLPDMMGVMASLQFLSPDGKSRSFDHKANGYSRGEGAAFCVLKTLSRALEDGDVIRGIIRNSAVNQDGNTNGITFPSADAQEVLIRKAYADAGLSLAHTAYIEAHGTGTAAGDPLEAQAIGNTFGRARQSGDPVYMGSIKSNVGHLEGGSGLTQVIKAILMLEHGKIPPSLHYERPNP…		gene_05447/MPEPLMPIAIVGIAGRFPGDAENPERLWDMVCEGRNALTKVPSSRFNSDAFCHPHGERQGTTNVDKAHFMNHDISAFDAPFFNLRPKEVKAMDPQQRMALECTYEALENGKSISENHKEQVSGSNTSCYIGYFTRDYGEMLSSDRYNLPIYQPTGNGNAIMSNRISWYFNMKGPSITIDTACSSSLVALHLACQSLRTGESTMSVVGGTNLILLPDMMGAMASMQFLSPDGKSQAFDEKANGYARGEGAAFCILKPLELAITNGDVIRGVIRNSAVNQDGYTNGITLPSCDAQQALIRKVYADAGLSLAHTGYVEAHGTGTPAGDPLEAEALGKTFGQARRRDDPVYIGSIKSNVGHLEGGSGLAQVIKAVKMLEHGMIPASLHYEKP…			gene_00551/MVATDLGPDEAKEFINRHVPGRVAVACFNSPSSTTLSGDAEAIDELLVFLKEDIRFVRNLEVDVPYHSNHMKDIAEEYHQSLADIKPLPEDSKGPNMFSSLEPGLVTSDKFQPEYWVANMVSPVNFLGGLEALILNGPAGKPRRRANQRNQADPVFIEIGPHGALKGYLRQILTPSSKQSGPIKDLRYQSVLWRGSCAAQTSLGVAGKLFQLGYPIDIEAVNCASGSQSGLPFLVDLPPFNWNHNLKYWSESHAARAHRFREHPRIDLLGSQTIDSSNYEPRYRNILRCNEVPWMKHHKVQEHILYPAAGMMAMSIEAMRQRADQSQEVEGYELRDVVFAKAIIVPEGGDGVETMLTLRPSSSHGSGTDVAVWQEFQLYSRRESWERN…
PKS25	gene_08611/MALEQKLGLTDWYGDDRDPIDASAVSTVIGERRSPSNPVYIGSVKSNFGHLEGASGAVSVVKAVMMLERKMMLPNPNFIQMNPKIEHPERLKVLTEAISWPSEAPRRIVVTNFGFGGSNAAVLLDEESNGNAEDVIKHTNGTNGTNGTNGTNNTYDESPHQLFVFSSKSSHSLGQYIKSLVQYLDSTDYSALDISYTLGQRRTHFPHAFSVVANSLLSLKNELSNMPSIPSSLRSDSPNVAFIFTGQGAQYSQMASGLSQYHVFAEALRRAEKILHDLGATWSLANELEAPKSLSRIDTAEISQPACTAIQLALVLLLRSWRIMPMAVLGHSSGEIAAAFSADLITFETAMAIAYFRGVAANRLLNDDTVRGAMLAVGAGPDEAARLL…		gene_07425/MDSPEPLAVVGYAYRAPGVGRKALWEFLAEAKSAWSQIPKDRMNAEAIYHPSKAGFFSSKGGHFLPDDIYAFDSAFFNIKTDEARAMDPQHRLLLEMAFEAMESAGLTLPELAGSRAGVFTAHDIADTTLGMMEDAPMTTKYSATGVAPAMAANRLSYFFGLTGPSVTLDAACAGSAYAIHVACKSLLQGDCSVAFVNAAKLLTGPGMWSLLGSMGALSPEGKSFSYDSRASGFGKGEGGTCLIIKRLSDARASGDPVRAVIRNTAVSHSGRSNGITMPSRTAQEDLLLRLHHDVGLDPNDTGFVEGHGTGTEVGDPIDASAVSSVIGSRRSSSNPVYIGSIKSNFGHLEGASGAISVVKAIMMLERNMLLPNADFIQMNPKIEHPER…	gene_06622/MDSSEPLAVVGYAYRAPGVGRKALWEFLAEAKSAWSQIPKDRMNAEAIYHPSKAGFFSSKGGHFLPDDIYAFDSAFFNIKTDEARAMDPQHRLLLEMAFEAMESAGLTLPELAGSRAGVFTAHDIADTTLGMMEDAPMTTKYSATGVAPAMAANRLSYFFGLTGPSVTLDAACAGSAYAIHVACKSLLQGDCSVAFVNAAKLLTGPGMWSLLGSMGALSPEGKSFSYDSRASGFGKGEGGTCLIIKRLSDARASGDPVRAVIRNTAVSHSGRSNGITMPSRTAQEDLLLRLHRDVGLDPNDTGFVEGHGTGTEVGDPIDASAVSSVIGSRRSSSNPVYIGSIKSNFGHLEGASGAISVVKAIMMLERNMLLPNADFIQMNPKIEHPER…	gene_16240/MDSPEPLAVVGYAYRAPGVGRKALWEFLAEAKSAWSQIPKDRMNAEAIYHPSKAGFFSSKGGHFLPDDIYAFDSAFFNIKTDEARAMDPQHRLLLEMAFEAMESAGLTLPELAGSRAGVFTAHDIADTTLGMMEDAPMTTKYSATGVAPAMAANRLSYFFGLTGPSVTLDAACAGSAYAIHVACKSLLQGDCSVAFVNAAKLLTGPGMWSLLGSMGALSPEGKSFSYDSRASGFGKGEGGTCLIIKRLSDARASGDPVRAVIRNTAVSHSGRSNGITMPSRTAQEDLLLRLHCDVGLDPNDTGFVEGHGTGTEVGDPIDASAVSSVIGSRRSSSNPVYIGSIKSNFGHLEGASGAISVVKAIMMLERNMLLPNADFIQMNPKIEHPER…	gene_13625/MDSPEPLAVVGYAYRAPGVGRKALWEFLAEAKSAWSQIPKDRMNAEAIYHPSKAGFFSSKGGHFLPDDIYAFDSAFFNIKTDEARAMDPQHRLLLEMAFEAMESAGLTLPELAGSRAGVFTAHDIADTTLGMMEDAPMTTKYSATGVAPAMAANRLSYFFGLTGPSVTLDAACAGSAYAIHVACKSLLQGDCSVAFVNAAKLLTGPGMWSLLGSMGALSPEGKSFSYDSRASGFGKGEGGTCLIIKRLSDARASGDPVRAVIRNTAVSHSGRSNGITMPSRTAQEDLLLRLHRDVGLDPNDTGFVEGHGTGTAVGDPIDASAVSSVIGRRRSSSNPVYIGSIKSNFGHLEGASGAISVVKAIMMLERNMLLPNADFIQMNPEIEHPER…	gene_05660/MDSPEPLAVVGYAYRAPGVGRKALWEFLAEAKSAWSQIPKDRMNAEAIYHPSKAGFFSSKGGHFLPDDIYAFDSAFFNIKTDEARAMDPQHRLLLEMAFEAMESAGLTLPELAGSRAGVFTAHDIADTTLGMMEDAPMTTKYSATGVAPAMAANRLSYFFGLTGPSVTLDAACAGSAYAIHCTLPEGKSFSYDSRASGFGKGEGGTCLIIKRLSDARASGDPVRAVIRNTAVSHSGRSNGITMPSRTAQEDLLLRLHCDVGLDPNDTGFVEGHGTGTEVGDPIDASAVSSVIGSRRSSSNPVYIGSIKSNFGHLEGASGAISVVKAIMMLERNMLLPNADFIQMNPKIEHPERLKVLTKAIPWPREAPRRVVVTNFGFGGSNAAVLLD…			gene_06665/MNAEAIHHPSKAGFFSSNGGHFLPDDIYAFDSAFFSIKTEEAKAMDPQHRLLLEMAFEAMESAGLTLPELAGSRTGVFTAHDIADTTLGMLEDLPTTTKYSATGVAPVMAANRLSYFFDLTGPSVTLDAACAGSAYAIHVACKSLLEGDCSVAFVNAAKLLTGPGMWSLLVHSRQKEKSFSYDSRASGFGKGEGGACLIIKRLSDARACGDPVRAVIRNTAVSHSGRSNGITMPSRTAQEDLLLRLHREVGLDPNDTGFVEGHGTGTEVGDPIDAGAVSTVIGSRRSSSNPVYIGSIKSNFGHLEGASGAISVVKAIMMLERKMLLPNADFIEMNPKIEHPERLKVLTKAIPWPLEAPRRVVVTNFGFGGSNAAVLLDEEPKKAADNG…	gene_12303/MDNHEPLAIVGYAYRAPGVGRKALWEFLAEAKSAWSQIPKDRMNAEAIHHPSKAGFFSSNGGHFLPDDIYAFDSAFFNIKTDEARAMDPQHRLLLEMAFEAMESAGLTLPELAGSRAGVFTAHDIADTTLGMMEDAPTTTKYSATGVAPAMAANRLSYFFGLTGPSVTLDAACAGSTYALHVACKSLLEGDCSVAFVNAAKLLTGPNMWSMLGSMGALSSEGKSFSYDSRASGFGKGEGGTCLIIKRLSDARACGDPVRAVIRNTAVSHSGRSNGITMPSRTAQEELLLRLHRDVGLDPNDTGFVEGHGTGTEVGDPIDASAVSTVIGSRRSSSNPVYIGSIKSNFGHLEGASGAISVVKGIMMLERNMLLPNADFIEMNPKIEHPER…										gene_10706/MDSPEPLAVVGYAYRAPGVGRKALWEFLAEAKSAWSQIPKDRMNAEAIYHPSKAGFFSSKGGHFLPDDIYAFDSAFFNIKTDEARAMDPQHRLLLEMAFEAMESAGLTLPELAGSRAGVFTAHDIADTTLGMMEDAPMTTKYSATGVAPAMAANRLSYFFGLTGPSVTLDAACAGSAYAIHVACKSLLQGDCSVAFVNAAKLLTGPGMWSLLGSMGALSPEGKSFSYDSRASGFGKGEGGTCLIIKRLSDARASGDPVRAVIRNTAVSHSGRSNGITMPSRTAQEDLLLRLHRDVGLDPNDTGFVEGHGTGTAVGDPIDASAVSSVIGRRRSSSNPVYIGSIKSNFGHLEGASGAISVVKAIMMLERNMLLPNADFIQMNPEIEHPER…
PKS26	gene_09322/MSQHMDPDNTPIAICGMGVRLPGGICSSSDLFDFLVNKGDARNVVPKDRYNVEAYHDPSGKAGSIATKYGYYLDIDLAEFDGSMFRISNAELAAMDPSQRLLLEVTREAFESAGEADFRGKNIGTFVGDFTEDWQDLQNVDLLNAAPYQMTGKGDFALANRLAFEYDLLGPSVSTKTACSATAEAVHQAVLAIRSGSCPSAIVGGANIIITPRVSIAMTQFGLLAADGNCKTFDADADGFARGESVCALYLKRLDLAVRDGNPIRAVIRACDSNADGGDGSRTFGTPNAVAQEALIRQTYRLAGLPLHETKVVELHGTGTPVGDPLETTAIAACFGGDEEVFIGSVKPNLGHGEGGSAMASIIKSVVALENQTILPNIKFQRPNPKIP…		gene_04806/MSQHMDPNNTPIAICGMGVRLPGGIRSSSDLFDFLVNKGDARNVVPKDRYNVEAYHDPSGKAGSIATKYGYYLDIDLAEFDGSMFRISNAELAAMDPSQRLLLEVTREAFESAGEADFRGKNIGTFVGDFTEDWQDLQNVDLLNAAPYQMTGKGDFALANRLAFEYDLLGPSVSTKTACSATAEAVHQAVLAIRSGSCPSAIVGGANIIITPRVSIAMTQFGLLAADGNCKTFDADADGFARGESVCALYLKRLDLAMRDGNPVRAVIRACDSNADGGDGSRTFGTPNAVAQERLIRQTYRLAGLPLHETKVVELHGTGTPVGDPLETTAIAACFGGEEELFIGSVKPNLGHGEGGSAMASIIKSVVALENKTILPNIKFQRPNPKIP…	gene_10943/MSQHMDPNNTPIAICGMGVRLPGGIRSSSDLFDFLVNKGDARNVVPKDRYNVEAYHDPSGKAGSIATKYGYYLDIDLAEFDGSMFRISNAELAAMDPSQRLLLEVTREAFESAEDWQDLQNVDLLNAAPYQMTGKGDFALANRLAFEYDLLGPSVSTKTACSATAEAVHQAVLAIRSGSCPSAIVGGANIIITPRVSIAMTQFGLLAADGNCKTFDADADGFARGESVCALYLKRLDLAVRDGNPVRAVIRACDSNADGGDGSRTFACFGGNEEVFIGSVKPNLGHGEGGSAMASIIKSVVALENKTILPNIKFQRPNPKIPWHRNLKVPIEARPWPKGARERMSINSFGLGGSNVHIIIDSAASMALNNIQETCDAIQSLHGSSHLE…	gene_11235/MSQHMDPNNTPIAICGMGVRLPGGIRSSSDLFDFLVNKGDARNVVPKDRYNVEAYHDPSGKAGSIATKYGYYLDIDLAEFDGSMFRISNAELAAMDPSQRLLLEVTREAFESAGEADFRGKNIGTFVGDFTEDWQDLQNVDLLNAAPYQMTGKGDFALANRLAFEYDLLGPSVSTKTACSATAEAVHQAVLAIRSGSCPSAIVGGANIIITPRVSIAMTQFGLLAADGNCKTFDADADGFARGESVCALYLKRLDLAVRDGNPVRAVIRACDSNADGGDGSRTFGTPNAVAQERLIRQTYRLAGLPLHETKVVELHGTGTPVGDPLETTAIAACFGGDEEVFIGSVKPNLGHGEGGSAMASIIKSVVALENKTILPNIKFQRPNPKIP…	gene_09211/MSQHMDPNNTPIAICGMGVRLPGGIRSSSDLFDFLVNKGDARNVVPKDRYNVEAYHDPSGKAGSIATKYGYYLDIDLAEFDGSMFRISNAELAAMDPSQRLLLEVTREAFESAGEADFRGKNIGTFVGDFTEDWQDLQNVDLLNAAPYQMTGKGDFALANRLAFEYDLLGPSVSTKTACSATAEAVHQAVLAIRSGSCPSAIVGGANIIITPRVSIAMTQFGLLAADGNCKTFDADADGFARGESVCALYLKRLDLAVRDGNPVRAVIRACDSNADGGDGSRTFGTPNAVAQERLIRQTYRLAGLPLHETKVVELHGTGTPVGDPLETTAIAACFGGDEEVFIGSVKPNLGHGEGGSAMASIIKSVVALENKTILPNIKFQRPNPKIP…	gene_10474/MTLNNIQETCDAIQSLHGSSHLEHVVRSSSANENGQVDVESQANGNGHYNAYVTNNGHNVLTNGALETTKSGLANGTSNGVSNGTSRPITNGTCVTTNGGVDNNEVLHNNNISHEATKGHEQAPDHANGYGQSNGHADAASEAPLNGDGERGNEGGLPKSHAQLNGRSNTNGHHEHDNKH TTPPRSQAKFGDGNATSTQPETKGLLLFSGNSAPAATKLASSHQEYLVRNPEKLDALVYTLASRRERLKLATYCIAQGTTTTEPPAPTENMGVDQVAFIFTGQGAQWVGMGREMVLENAVFAASIRQMDKTLKSLNHAPQWTLEDLLLSDPSDKDALSPVDIAQPICTAVQVAYVDTLATWNIRPSAVAGHSSGEIAAAYAAGILTS…			gene_06655/MAGAKSDIPNGTLNGTSNGSSHSSTYSLTHGGLDNNDNLHDGHEHAHEHTNGYRPSRGHVNGNGAPLNGSTTTNGHHHDDNDKQTITSSPQAKFENGNATSTQLEAKGLLLFSGNSAPAVKKLASSHREYLEKSPEKLDAMVYTLASRRERLKLATYSIAQGTTITEPPAPAENLGVDQVAFIFTGQGAQWVGMGREMMLEDSVFATSIRQMDKVLRSLEHAPQWSLEELLLSGSTDKDALSPVDIAQPICTAIQVAYVDTLATWNVRPSAVAGHSSGEIAAAYAAGILTSSEAIITAYYRGYACVQNKTPGGMAAVGLGRDKIEPLLKPGVVLACENSNASVTISGDLDVLDATIDKLKAAFPDVFVRKLRVATAYHSHHMATVGDS…	gene_12315/MSQNMDPNNTPIAICGMGVRLPGGIRSSSDLFEFLVNKGDARNVVPKDRYNVEAYHDPSGKAGSIATKYGYYLDIDLAEFDGSMFRISNAELAAMDPSQRLLLEVTREAFESAGEADFRGKNIGTFVGDFTEDWQDLQNVDLLNAAPYQMTGKGDFALANRLAFEYDLLGPSVSTKTACSATAEAVHQAVLAIRSGSCPSAIVGGANIIITPRVSIAMTQFGLLAADGNCKTFDAGADGFARGESVCALYLKRLDLAVRDGNPVRAVIRACDSNADGGDGSRTFGTPNAVAQEALIRQTYRLAGLPLHETKVVELHGTGTPVGDPLETTAIAACFGGHEEVVIGSVKPNLGHGEGGSAMASIIKSVVALENRTILPNIKFQRPNPKIP…										gene_06262/MSQHMDPNNTPIAICGMGVRLPGGIRSSSDLFDFLVNKGDARNVVPKDRYNVEAYHDPSGKAGSIATKYGYYLDIDLAEFDGSMFRISNAELAAMDPSQRLLLEVTREAFESAGEADFRGKNIGTFVGDFTEDWQDLQNVDLLNAAPYQMTGKGDFALANRLAFEYDLLGPSVSTKTACSATAEAVHQAVLAIRSGSCPSAIVGGANIIITPRVSIAMTQFGLLAADGNCKTFDADADGFARGESVCALYLKRLDLAVRDGNPVRAVIRACDSNADGGDGSRTFGTPNAVAQERLIRQTYRLAGLPLHETKVVELHGTGTPVGDPLETTAIAACFGGDEEVFIGSVKPNLGHGEGGSAMASIIKSVVALENKTMLPNIKFQRPNPKIP…
PKS27	gene_03510/MAVSLPSLLVFGPQGDLASEKTHQDLRLELSSNTRLSALREAVDDLPNFWEALVGFDPSLGRVPGAKYLGELKQWLNKTSTQVPYPQTSLPNHSALVVSVLVQITQYTHYLDQLGHDSHLRLLTSTGTGGAQGFCVGLLTAVAVAVSATEADLGHFAAIALRLAVCIGAYVDIDGAYSSAATEYRAIALRWREGNVEDKAEVTAILESTPNAYISSVNDDASVTVTTTAAEADRLINRARNSHLRTKTLHIRGRYHTPDHADVVEKILKFASTTQYLQFPDAKELKIPLRNTATGDVVSGGSLTRLALESTLSNVADWYKTLQSAIQELPGSNHTIAFAGLGNAVPASLVGSGKLNILALGDSNEFKAKQRETPQDSHVSDPVERTNR…		gene_07349/MTVTLPSILVFGPQGDLASEKTRQDLRLELNSSTRLSALREAVDDLPQFWEALVNFDPSLGRVPGAKYIGELKQWLNNTAAPVPYPQTSVPNHCALALSVLVQITQYTHYLDHLGHNSHPRVLSSTRLGGVHGFCVGILSAIAVAVSTTEADLGHFAAIALRLAVCIGAYVDLDGIYSSIPTGYRAIALRWREGRVEDKAEVTDILESTADAYISSINDDASVTVTVTAIEEDGLIDKARKSDLRTKTLHICGRYHTPDHAGAVEKILKFASITKDLQFPDAKELNVPLRNTATGDVVSGCSLTRLALESTLTNVADWYKTLQSAIQQLPGSHHTIAFAGLGNAVPASLVGSGKLTVLALGDSHEPNTKQGEKLSSNHVNGLANGVNG…	gene_06703/MTVTLPSILVFGPQGDLASEKTHQDLRLELNSSTRLSALREAVDDLPQFWEALVNFDPSLGRVPGAKYIGELKQWLNNTAAPVPYPQTSVPNHCALALSVLVQITQYTHYLDHLGHNSHPRVLSSTRFGGVHGFCVGILSAITVAVSTTEADLGHFAAIALRLAVCIGAYVDLDGIYSSIPTGYRAIALRWREGRVEDKAEVTDILESTADAYISSINDDASVTVTVTAIEEDGLIDKARKSDLRTKTLHICGRYHTPDHAGAVEKILKFASITKDLQFPDAKELNVPLRNTATGDVVSGCSLTRLALESTLTNVADWYKTLQSAIQQLPGSHHTIAFAGLGNAVPASLVGSGKLTVLALGDSHEPNTKQGEKLSSNHVNGLANGVNG…	gene_16320/MTVTLPSILVFGPQGDLASEKTHQDLRLELNSSTRLSALREAVDDLPQFWEALVNFDPSLGRVPRCQITQYTHYLDHLGHNSHPRVLSSTRLGGVHGFCVGILSAIAVAVSTTEADLGHFAAIALRLAVCIGAYVDLDGIYSSIPTGYRAIALRWREGRVEDKAEVTDILESTADAYISSINDDASVTVTVTAIEEDGLINKARKSDLRTKTLHICGRYHTPDHAGAVEKILKFASITKDLQFPDAKELNVPLRDTATGEVVSGGSLTRLALESTLMNVADWYKTLQSAIQQLPGFHHTIAFAGLGNAVPASLVGNGKLTVLAFGDSHEPNTKQGEKLSSNHVNGLANGVNGINGVNSNDTGIDFDVYNDLDQYPPHSIAIVGMAGRF…	gene_13707/MTVTLPSILVFGPQGDLASEKTHQDLRLELNSSTRLSALREAVDDLPQFWEALVNFDPSLGRVPGAKYIGELKQWLNNAAAPVPYPQTSVSNHCALALSVLVQITQYTHYLDHLGHNSHPRVLSSTRLGGVHGFCVGILSAIAVAVSTTEADLGHFAAIALRLAVCIGAYVDLDGIYSSIPTGYRAIALRWREGRVEDKAEVTDILESTADAYISSINDDASVTVTVTAIEEDGLIDKARKSDLRTKTLHICGRYHTPDHAGAVEKILKFASITKDLQFPDAKELNVPLRNTATGDVVSGCSLTRLALESTLTNVADWYKTLQSAIQQLPGSHHTIAFAGLGNAVPASLVGSGKLTVLALGDSHEPNTKQGEKLSSNHVNGLANGVNG…	gene_05747/MTVTLPSILVFGPQGDLASEKTHQDLRLELNSSTRLSALREAVDDLPQFWEALVNFDPSLGRVPGAKYIGELKQWLNNTAAPVPYPQTSVPNHCALALSVLVQITQYTHYLDHLGHNSHPRVLSSTRLGGVHGFCVGILSAIAVAVSTTEADLGHFAAIALRLAVCIGAYVDLDGIYSSIPTGYRAIALRCREGRVEDKAEVTDILESTADAYISSINDDASVTVTVTAIEADGLIDRARKSDLRTKTLHICGRYHTPDHAGAVEKILKFASITKDLQFPDAKELNVPLRDTATGEVVSGGSLTRLALESTLMNVADWYKTLQSAIQQLPGSHHTIAFAGLGNAVPASLVGNGKLTVLTLGDSHEPNTKQGEKLSSNHMNGLANGING…									gene_09789/MTGTLPSLLVFGPQGDIALEKAHQSLHLELSSSTRLSALREAVDDLPQFWETLVDFDPSLRQVPGAKYLGQLKQWLNGAGPIPHSQQADLPNHYALAISVLLQITQYTRYLDHLGHDSHRRLLDSTKSGGVQGFCVGFLSAVAVVTSKAEADIGASAATALCLAVCIGAYVDLDGACYSTPTEYRATALRWRAGNAEDKAEVVAVLETTPHAYISSVNDVASVTITTTAADAKGLIDRARKSHLRTSAVHVHGRYHTPDHAHAVDKLMKFASLCKAVQFPEVQEVHIPICDTATGEIVSGGSLTRLALENTLLHVANWYKTLQSAIKQLPESHHTIASAGLGNPIPASILADGNFAIITLSDLEDLNPIAGNMPSNGRVNSHVNGESG…		gene_10939/MSSRKPIDPARAAESNLGWILGVTAAFHGLALIFVASRIYIRLAIVRSFGKDDAMILMSALCALLGGMVTYIIAAFHGLGRHADTIPKADHKEYMKMTFIQAVVSTICALACLKISIGFALLRLSHSRRYSQIIWGMIGFVCVYATVSWIEWLVNCDPIAGFWDKSIPGIKCLPVKVHKGFALMNTACNILTDVVFATLPVPMIWRLQMAYRARVYLISILSLGYAAVLLGITKVVCQNVFRGDPDQSFTNWIQFFGFLQVNVGIMAACAPSLKPLVGGVMGLTSLTSRYGKSGGGGPGSKYGTGVQASVRRESRGVGLGGAAGGTKKGWFRSKSETDEFEMTTDMFGALHEQKGIHQVRATAVSPSGSEDDEWHIKPDGNNIGIMRT…			gene_10623/MTVTLPSILVFGPQGDLASEKTHQDLRLELNSSTRLSALREAVDDLPQFWEALVNFDPSLGRVPGAKYIGELKQWLNNTAAPVPYPQTSVPNHCALALSVLVQITQYTHYLDHLGHNSHPRVLSSTRLGGVHGFCVGILSAIAVAVSTTEADLGHFAAIALRLAVCIGAYVDLDGIYSSIPTGYRAIALRWREGRMEDKAEVTDILESTADAYISSINDDASVTVTVTAIEEDGLIDKARKSDLRTKTLHICGRYHTPDHAGAVEKILKFASITKDLQFPDAKELNVPLRNTATGDVVSGCSLTRLALESTLTNVADWYKTLQSAIQQLPGSHHTIAFAGLGNAVPASLVGSGKLTVLALGDSHEPNTKQKEKLSSNHVNGLANGVNG…
[truncated: 65 more rows]

## Sheet: Table S5
	Apiospora arundinis IDT 11852	Apiospora arundinis IDT 41787	Apiospora arundinis IDT 7813	Apiospora arundinis CBS 124788	Apiospora arundinis CBS 450.92	Apiospora aurea CBS 244.83	Apiospora hydei CBS 114990	Apiospora rasikravindriarae CBS 337.61	Apiospora marii CBS 200.57	Apiospora marii CBS 497.90	Apiospora phaeosperma CBS 142.55	Apiospora phragmitis CBS 135458	Apiospora pterosperma CBS 123185	Apiospora saccharicola 334.86	Apiospora saccharicola 831.71	Apiospora arundinis AAU 773	Apiospora sphaeosperma	Apiospora malaysiana	Apiospora koreanum KUC21332	Apiospora kogelbergensis CBS 113332	Apiospora kogelbergensis CBS 117206
[truncated: 29 more rows]
